# Supplementary material for: Metabolomic profiling reveals a differential role for hippocampal glutathione reductase in infantile memory formation
Source: eLife. 2021 Nov 26;10:e68590. doi: 10.7554/eLife.68590 (PMC8626085; doi:10.7554/eLife.68590)
Supplement: Figure 1—source data 1. [file elife-68590-fig1-data1.xlsx]

## Sheet: Figure 1-Source Data 1
Figure 1-Source Data 1
Figure 1a
Amino Acids	145
Peptides	38
Carbohydrates	50
Energy	11
Lipids	110
Nucleotides	52
Cofactors and Vitamins	31
Xenobiotics	17
Total	454
Figure 1b
Sample	PN1_1M	PN1_2F	PN1_3M	PN1_4M	PN1_5F	PN7_1M	PN7_2M	PN7_3F	PN7_4F	PN7_5F	PN17_1F	PN17_2M	PN17_3F	PN17_4F	PN17_5M	PN17_6M	PN17_7M	PN24_1M	PN24_2F	PN24_3M	PN24_4M	PN24_5M	PN24_6F	PN24_7F	PN80_1M	PN80_2M	PN80_3M	PN80_4M	PN80_5M	PN80_6M	PN80_7M
Age	PN1	PN1	PN1	PN1	PN1	PN7	PN7	PN7	PN7	PN7	PN17	PN17	PN17	PN17	PN17	PN17	PN17	PN24	PN24	PN24	PN24	PN24	PN24	PN24	PN80	PN80	PN80	PN80	PN80	PN80	PN80
(N(1) + N(8))-acetylspermidine	0.6628	1.1597	0.8489	1.4674	0.9238	0.7075	0.9861	0.6234	0.6296	0.9195	1.4405	1.054	1.007	1.2956	0.7657	0.993	1.0225	0.9869	0.9371	1.0542	1.1272	1.2525	1.1005	0.9142	1.1027	0.7517	1.0561	0.833	0.8526	1.1325	0.9744
1,5-anhydroglucitol (1,5-AG)	0.709	0.9492	0.6797	1.3041	0.9838	0.9586	1.0803	0.9257	0.7996	1.2633	1.901	1.874	1.6914	2.0963	1.8058	2.3441	1.6482	1.2414	0.7939	1.177	0.919	1.0514	0.9871	0.9805	0.8433	0.8271	0.7303	0.9019	0.5457	0.9988	1.292
1-docosahexaenoylglycerol (22:6)	0.154	1.7198	0.9591	1.747	1.0959	1.3513	0.9989	0.154	1.1069	1.3272	0.154	0.499	1.5877	0.6224	1.3047	0.9668	1.1641	0.7313	0.8493	1.2073	0.7289	1.595	1.7611	1	1.2864	0.5998	1.3934	0.154	0.154	0.3733	0.3512
1-methyl-4-imidazoleacetate	0.2016	0.2713	0.4299	0.3258	0.9718	0.221	0.2002	0.1433	0.1471	0.1658	0.8124	1.0762	1.2764	1.1133	1.0314	1.1378	1.2413	1.0679	1.2424	1.2874	1.3793	1.3115	1.5275	1.2905	0.6002	0.7214	0.7606	0.6125	0.4306	0.6026	0.7995
1-methylguanidine	0.8993	1.0589	0.8964	1.4784	0.8725	0.8463	1.0086	0.9026	0.8776	1.1874	0.2165	0.6809	0.7049	0.7545	0.6864	0.666	0.8414	1.5041	1.526	2.1507	1.5489	1.7221	1.8449	1.1496	1.1851	0.9002	0.8749	0.9319	0.7775	1.0865	1.0051
1-methylhistidine	2.2345	4.5897	2.4912	4.6499	2.2755	0.9959	1.0179	1	0.9548	0.7732	1.1435	1.6323	2.4212	2.4225	1.5494	1.3967	1.8749	0.4199	0.5724	0.9347	1.0597	0.9649	1.4183	0.4526	0.1892	0.2781	0.6116	0.6227	0.439	0.4145	1.3001
1-methylnicotinamide	0.2379	0.7598	0.301	0.3568	0.199	0.199	0.268	0.3957	0.199	0.2036	1.7018	1.9653	1.9418	2.0253	2.1421	2.0081	2.4738	1.363	0.9912	1.2015	1.0088	0.963	1.1218	1.0519	0.6906	0.6883	0.5496	0.6045	0.6461	0.8398	0.7269
1-oleoylglycerol (18:1)	1.6293	7.0905	2.9131	5.1236	3.05	1.4827	1.302	0.437	1.0511	1.2604	0.3962	0.2312	0.1872	0.1872	2.5643	0.2761	1.0704	0.7148	0.662	0.6366	0.7238	0.9278	1.254	0.6884	3.8578	0.8636	1.2224	0.3614	0.7155	0.9604	1.3823
1-palmitoylglycerol (16:0)	0.8496	4.6981	1.5568	2.3185	1.4057	1.3595	1.5849	0.7195	2.8369	1.3363	0.5436	2.2132	8.2104	0.5397	0.5995	1.2939	1.9207	0.7057	0.7204	0.8161	1.1264	1.4615	1.9097	0.8045	1.0193	0.7993	0.8075	0.7389	0.554	0.65	1.57
1-ribosyl-imidazoleacetate	13.4506	19.374	18.9089	26.9639	38.8845	1	1.0345	0.6416	0.5596	0.637	2.7431	4.9381	2.1004	2.7056	4.3904	4.6548	5.0391	1.1232	0.8282	0.7186	0.8392	1.058	0.7741	0.9971	0.3195	0.2633	0.17	0.2954	0.1137	0.347	0.2219
12-HETE	0.1096	0.3076	0.1096	0.6511	0.3477	0.7977	0.8461	0.8708	0.7943	0.7963	1.4253	2.0633	2.5103	1.8041	1.8519	1.8696	1.232	1.651	0.7896	2.9696	2.341	2.7307	2.2103	1.9973	1.0548	1.1041	0.98	0.236	0.72	0.2883	0.9887
13-HODE + 9-HODE	0.2299	0.9546	0.6181	1.0496	0.9099	1.0454	1.0856	0.9096	0.7444	1.2529	0.4169	1.2793	1.1046	0.6243	1.4491	1.2103	1.4398	1.2556	1.3794	1.1606	1.3435	1.37	1.1662	1.0509	0.3995	0.5498	0.3623	0.6212	0.3437	0.5369	0.2869
15-HETE	0.3132	0.4177	0.3057	0.5801	0.2984	0.6385	0.7318	0.675	0.6386	0.6765	0.4706	1.2616	0.9087	0.8541	1.3873	1.1553	1.27	1.6615	1.6034	1.975	1.9902	1.7215	1.7107	1.4698	1.1279	0.946	0.806	0.7904	0.7703	1.0557	0.9058
15-KETE	0.5274	0.7754	0.4786	0.8039	0.3543	0.7418	1.0011	1.1158	0.8353	1.0789	0.246	1.1096	1.1708	1.2126	1.1613	0.9217	1.1997	1.5458	1.3401	1.3327	1.4987	1.2988	1.4766	1.1995	1.0244	0.7691	0.8781	0.8666	0.7066	0.6946	0.7215
2'-deoxycytidine	0.5188	0.735	0.5605	0.8077	0.5603	0.9407	0.9722	0.7671	0.9264	0.9849	1.0763	1.1395	1.2028	1.0814	1.1678	1.2333	1.4067	1.0828	1.0796	1.3329	1.2014	1.3551	1.2114	1.0151	0.477	0.4008	0.3889	0.3333	0.3602	0.5448	0.4373
2'-deoxycytidine 5'-monophosphate	0.7679	0.8762	0.7668	1.0155	0.7897	0.6559	0.6112	0.496	0.5446	0.5188	0.7004	0.7229	0.8305	0.9564	0.7336	0.781	0.9845	1.9386	1.7784	1.925	2.1172	2.2973	1.922	1.6795	1.1793	1.0586	1.2079	0.9824	0.9102	1.3484	1.4296
2'-deoxyinosine	1.3988	1.5352	1.4152	1.7028	1.5003	1.2729	1.2178	0.8985	1.0556	1.0916	0.73	0.7345	0.6748	0.6783	0.8021	1.0552	1.0802	1.0475	1.0156	1.4294	1.1368	1.4992	1.363	0.9949	1.0516	0.7141	0.7839	0.8159	0.5959	0.9208	1.0051
2'-deoxyuridine	0.2788	0.5855	0.3545	0.3955	0.2098	0.8451	0.9707	0.8805	1.1154	0.8977	1.1571	1.2497	1.23	1.0742	1.2423	1.1044	1.3473	0.9955	1.2604	1.301	0.9105	1.2315	1.1549	1.0926	0.7942	0.6219	0.5673	0.5224	0.5324	0.7409	0.6244
2'-O-methylcytidine	3.4649	4.0737	3.2987	4.7002	3.6224	3.9662	2.914	2.4792	3.1713	2.3374	0.8951	1.0522	1.0735	1.353	0.9977	1.8044	1.8782	0.7688	0.6798	1.2685	0.9664	1.0797	0.9192	0.4751	0.8037	0.7514	0.8529	0.9498	0.2485	1.1017	0.987
2-aminoadipate	0.9264	1.0845	0.7626	1.14	0.9491	0.3957	0.5894	0.3411	0.364	0.5553	0.7842	0.8739	1.0628	1.2857	1.4718	0.9801	0.8763	2.9105	2.0861	2.4312	1.9694	2.7417	2.0096	1.7636	0.6213	0.6201	0.7716	0.9252	0.9629	0.9696	1.4183
2-aminoheptanoate	1.2429	1.3905	0.9021	1.5133	0.6094	0.6094	0.857	0.9712	0.856	0.6094	0.6094	0.9029	0.853	0.6094	1.2894	1.0354	0.7721	1.7615	1.1014	1.7546	1.6695	1.5649	1.0864	1.2398	1.0415	0.8821	1.4348	0.6094	0.7007	0.8196	0.9563
2-docosahexaenoylglycerol (22:6)	0.3258	1.0482	0.3258	1.0274	1.2084	1.0358	0.5439	0.3258	1.0934	0.9174	0.3258	0.3258	1.0026	0.882	1.1215	1.0348	1.433	0.8157	1.0309	1.4511	0.5731	1.6657	1.5465	0.8084	0.7975	0.3258	1.1859	0.3258	0.3258	0.3258	0.5193
2-hydroxyadipate	1.3717	0.2798	1.0359	0.5614	0.2948	0.2798	0.2798	0.3904	1.6272	0.7807	0.2798	0.2798	2.3254	2.3385	0.7761	0.4603	1.304	0.9492	2.1185	1.0174	1.3808	1.2839	1.5204	0.8277	0.6309	0.7806	0.9797	1.121	0.644	0.9826	1.1271
2-hydroxybehenate	0.501	0.3403	0.3842	0.3832	0.3981	0.3648	0.2905	0.3319	0.3407	0.3377	0.7226	0.6193	0.5306	0.4853	0.5412	0.5879	0.4915	2.2405	1.1412	1.1277	1.1285	1.6403	1.0496	1.0887	3.2283	1.1974	1.5279	0.8003	1.0569	1.9496	1.2192
2-hydroxybutyrate/2-hydroxyisobutyrate	1.1483	1.1086	1.1866	1.4504	1.209	1.1011	1.2056	1.1874	0.9467	1.2804	1.2888	1.6966	1.9392	1.7481	1.9008	1.8581	2.0406	1.0265	0.7878	0.9457	0.922	0.9253	0.9735	0.7019	0.6025	0.5248	0.5842	0.5819	0.4623	0.586	0.5614
2-hydroxydecanoate	1.5034	1.5354	1.1492	1.6514	1.2414	1.0526	1.1344	1.2063	1.1315	1.2048	0.2681	0.8805	1.0148	1.0522	1	1.0192	1.124	1.047	0.7545	1.2163	0.8475	1.1276	1.1813	0.782	0.6464	0.5071	0.7194	0.2681	0.5363	0.5783	0.569
2-hydroxyglutarate	0.8085	0.9491	0.7638	1.1184	0.8355	1.1931	1.1446	0.8762	0.9752	1.1395	1.0161	1.3556	1.383	1.3134	1.4924	1.3262	1.3125	1.2914	0.9265	1.2481	1.0429	1.0467	1.1099	0.9271	0.7269	0.7719	0.7832	0.7404	0.5848	0.7288	0.7645
2-hydroxyheptanoate	1.0597	1.1386	0.9344	1.1975	0.8326	0.9502	1.1048	0.9137	0.7584	1.0092	0.4861	1.3389	1.4627	1.3122	1.3727	1.5627	1.5705	1.067	1.0222	1.1134	1.1233	0.9723	1.0098	0.9285	0.5547	0.4719	0.5179	0.5563	0.4503	0.5585	0.5274
2-hydroxypalmitate	0.8882	1.2947	1.1489	1.5004	0.9597	1.2227	1.1104	1.0939	0.9223	1.5549	0.825	1.061	1.5729	1.597	1.161	0.8646	1.2671	1.2383	0.8339	0.8149	0.7926	1.0908	1.1002	0.8504	1.2489	0.6682	1.0008	0.6502	0.736	0.9018	0.6782
2-methylbutyrylcarnitine (C5)	0.4118	0.5464	0.3081	0.3081	0.5424	2.537	2.1135	1.4014	1.4711	1.4983	1.6108	1.9742	1.3644	1.2852	1.2164	1.4604	1.1397	1.5062	0.88	1.618	0.3081	1.115	1.1253	0.8916	0.8079	0.6577	0.7972	0.5807	0.5868	0.7737	0.4827
2-methylcitrate/homocitrate	0.2231	0.2321	0.1819	0.2464	0.1751	0.4908	0.496	0.4059	0.4679	0.4487	1.0956	1.107	1.126	0.9996	1.2216	1.2725	1.5419	1.7508	1.66	2.1084	1.3538	1.7246	1.5139	1.3606	0.9329	0.8428	0.8406	0.9811	0.6723	0.9087	0.9527
2-methylserine	4.7344	5.6832	5.0578	6.7008	1.4993	0.308	1.2724	0.2632	0.5249	0.4005	0.7781	0.6418	0.3358	0.361	0.3757	0.69	0.9103	3.5792	3.0503	3.2594	2.5518	3.6403	3.2819	0.2632	0.674	0.8488	1.7543	0.2632	0.619	1.3363	1
2-oleoylglycerol (18:1)	1.1911	4.2182	2.2867	3.9062	2.363	0.8192	1.0388	0.3721	0.8553	0.9612	0.3117	0.2525	0.2705	0.1215	1.1915	0.3292	0.6889	0.7141	0.8121	1.0408	0.9375	1.3107	1.136	0.8448	2.7282	1.0503	1.1761	0.7212	0.6372	0.8714	1.0475
2-oxoarginine	0.6325	0.9664	0.8051	0.9997	0.8301	0.7816	1.0058	0.7884	0.9187	0.9721	0.4904	0.9206	0.9736	0.5747	1.1696	1.0003	1.2852	1.4617	1.4454	2.0192	1.2895	1.6397	1.2565	1.3966	1.4722	1.5088	0.8206	0.6333	0.7889	1.1112	1.1697
2-palmitoylglycerol (16:0)	1.003	3.4529	2.0127	3.4037	1.611	1.5231	2.023	0.8428	2.064	1.6513	0.1346	0.1346	0.8157	0.3794	0.4836	1.2713	1.3185	0.8246	0.7116	0.6827	1.0355	1.0963	1.4102	0.9913	1.7934	0.494	0.937	0.4912	0.4811	0.1346	1.1169
3'-dephosphocoenzyme A	0.2386	0.5233	0.2947	0.4802	0.4529	0.5166	0.4532	0.3643	0.5966	0.4796	1.862	1.0729	1.0754	1.4769	1.1792	1.307	1.6059	1.1794	1.3861	1.3662	1.6313	1.5166	1.3694	1.6381	0.7622	0.7043	0.833	0.8988	0.7554	0.8489	1.3254
3-(4-hydroxyphenyl)lactate	0.7522	0.8352	0.7594	0.9456	0.8544	0.9046	0.9854	0.9167	0.8035	1.0661	0.9669	1.043	1.0773	0.884	1.0719	1.5615	1.4053	0.8453	0.6273	1.424	1.3089	1.2392	1.2848	1.0272	0.9118	0.9055	0.9453	0.999	0.8692	1.2127	1.1691
3-aminoisobutyrate	0.6739	0.7227	0.4814	0.8206	0.5225	0.3865	0.5049	0.2512	0.4163	0.4648	0.7006	0.9524	1.9813	0.2512	1.4263	0.5505	1.2574	1.5443	1.9341	2.3738	1.4287	1.5582	1.1982	0.7546	1.4172	0.2777	1.0679	0.2512	0.2512	0.9904	0.2512
3-hydroxy-3-methylglutarate	0.9831	1.1546	0.8362	1.3864	0.6408	1.9317	2.0353	1.7883	1.6795	1.8717	1.2465	1.5125	1.6584	1.4181	1.4944	1.6837	1.7015	1.0169	0.8221	1.1617	0.834	1.0337	0.8989	0.706	0.4047	0.4153	0.3544	0.4082	0.288	0.4325	0.5032
3-hydroxyadipate	1.943	1.6258	1.2405	2.2774	0.5606	1.8604	2.9511	1.7797	2.35	2.6329	2.7567	4.7127	4.8206	4.5132	4.5404	4.6345	4.7201	0.7164	0.9683	1.3293	0.322	0.5213	0.4629	0.564	0.6557	0.459	0.4393	0.5166	0.3724	0.5374	0.187
3-hydroxybutyrate (BHBA)	1.5585	1.9331	1.7427	2.8138	1.1242	2.5232	2.752	2.6752	2.4058	3.2502	2.5218	4.8875	4.871	4.0221	3.6774	3.7439	3.6885	1.1224	0.6306	0.6852	0.8168	0.785	0.7995	0.5546	0.5587	0.4979	0.5354	0.7456	0.3351	0.629	0.6334
3-hydroxybutyrylcarnitine (1)	1.3619	1.229	1.1317	1.3759	0.885	3.0598	3.7214	3.0679	2.9596	3.0351	3.8361	6.5157	6.125	5.8626	6.0539	4.9793	5.2431	1.048	0.7986	0.9257	0.9118	0.9199	0.952	0.7235	0.4818	0.3497	0.499	0.5705	0.3752	0.4177	0.4359
3-hydroxybutyrylcarnitine (2)	0.9213	0.959	0.6609	0.9336	0.7149	2.0764	2.5214	1.9224	2.184	2.1963	1.7027	2.2044	2.2931	2.2294	1.9509	1.8098	1.5845	0.9989	0.7671	0.8841	1.0409	1.0759	0.9658	0.7187	0.8033	0.6109	0.762	0.8017	0.7911	0.7255	0.5459
3-hydroxyhexanoate	0.4755	1.0081	0.8912	1.5391	0.9392	0.7533	0.9772	3.9	1.0987	0.9919	0.4755	1.2794	3.4574	1.1462	1.0433	1.0384	1.0741	0.4755	0.7182	0.4755	0.4755	0.4755	0.4755	0.4755	0.4755	0.4755	0.4755	0.6503	0.4755	0.4755	0.4755
3-hydroxyisobutyrate	2.0446	2.5798	2.6622	3.6998	2.4623	1.3753	1.6824	1.1796	1.3335	1.8698	1.3306	1.4516	1.7359	1.1948	1.1938	1.2396	1.167	1.197	0.7171	1.1745	0.8234	0.7117	0.974	0.6713	0.3849	0.277	0.3213	0.4797	0.2825	0.2629	0.4545
3-hydroxypalmitate	0.9455	0.984	0.7427	0.9133	1.1114	1.18	1.3936	0.8384	1.3755	0.9987	0.3704	1.5082	1.2267	1.2319	1.357	1.9445	1.4974	1.0598	1.0246	0.8774	1.0013	1.0541	0.858	0.8221	1.2856	0.8471	0.7746	0.4634	0.4666	0.5187	0.5872
3-methoxytyrosine	0.5889	0.7275	0.508	1	0.4899	1.7676	1.8864	2.1855	2.0385	2.0215	2.7572	3.3414	4.5365	3.1886	4.2287	5.4733	5.3657	0.1388	0.5607	0.1388	0.3874	0.7055	0.5363	0.3084	0.1388	0.1388	0.2694	0.1388	0.1388	0.1388	0.3031
3-methylcytidine	0.1819	0.2737	0.1916	0.2529	0.2109	0.2326	0.2459	0.208	0.1833	0.219	0.3736	0.3923	0.4892	0.4205	0.591	0.4642	0.4798	1.3175	1.4791	1.618	1.4339	1.4628	1.3328	1.2325	1.1668	1.1381	1.0473	1.1827	0.9526	1.1638	1.2661
3-methylglutaconate	0.6691	0.7326	0.4878	1.1215	0.4548	0.9475	0.9376	0.9988	0.9268	1.3187	1.2011	1.4422	1.5234	1.1247	1.4566	1.4867	1.5598	1.8012	1.1269	1.6465	0.7221	1.429	1.0474	0.8615	0.5605	0.7483	0.453	0.4842	0.3792	0.6466	0.5518
3-methylhistidine	0.9065	1.9857	1.0167	2.2848	1.4339	0.2408	0.2975	0.3012	0.2551	0.3238	1.4824	1.6284	2.5566	2.1335	1.7172	1.8585	2.7063	0.1265	0.1265	0.4065	0.234	0.3434	0.1265	0.1265	0.6852	0.7601	0.9778	0.8164	1.052	0.864	1.813
3-phosphoglycerate	2.2806	3.2174	2.9746	2.9893	3.451	1.5761	1.4157	1.8599	1.4004	1.8967	0.9725	0.9993	0.9377	1.015	1.0632	1.1007	1.0537	0.8911	1.0051	0.9864	1.0657	0.9571	1.2018	1.0203	0.8179	0.9032	1.0146	0.9036	0.8343	0.8815	0.8233
3-ureidopropionate	3.7501	5.2863	5.9629	6.2859	4.4659	1.5724	1.3822	1.748	1.3869	1.468	1.0834	1.2974	1.55	1.0687	0.7884	0.7135	0.9313	1.127	0.879	1.2661	0.6651	0.7224	0.8813	0.3552	0.2471	0.3309	0.3373	0.2471	0.2471	0.2471	0.5357
4-cholesten-3-one	0.8676	1.2039	0.8832	1.1617	0.9381	0.7698	0.9998	0.8669	0.7828	0.9422	0.7082	1.0848	1.6124	1.1001	1.15	1.3108	1.2439	1.4224	1.368	1.1834	1.034	1.1912	1.1542	0.9974	0.9309	0.7854	0.6961	0.6726	0.7039	0.8224	0.7168
4-guanidinobutanoate	0.0485	0.0754	0.0434	0.0754	0.0475	0.3867	0.4691	0.3688	0.3986	0.4301	1.0121	1.337	1.3236	1.2862	1.3307	1.3605	1.4152	1.2791	1.1714	1.7166	1.1087	1.2845	1.3997	0.9879	0.5225	0.4199	0.484	0.3545	0.3676	0.592	0.6216
4-hydroxy-nonenal-glutathione	0.8424	0.9708	0.8194	1.3107	0.9175	1.057	1.129	0.8558	0.9686	0.8677	0.5288	1.4271	1.3911	2.1467	1.2559	1.9442	1.9395	0.9924	1.0583	1.0341	1.0892	1.0544	1.0947	0.9568	0.7942	0.5337	0.8695	0.7486	0.6015	0.8562	0.6457
5,6-dihydrouridine	2.6583	2.8837	2.5304	3.9956	2.3601	1.3906	1.2917	1.263	1.3194	1.5227	0.9247	0.7798	1.1327	1.1764	1.1154	0.975	1.0918	0.8788	0.7983	1.1013	1.0581	1.2451	1.1609	0.1785	0.7322	0.4833	0.678	0.5641	0.3522	0.7576	0.7574
5-(galactosylhydroxy)-L-lysine	1.3801	1.8221	1.4455	1.9612	1.6295	0.99	1.1328	0.9176	0.9991	1.1639	0.952	0.9432	1.0465	1.0819	1.2582	1.1223	1.1601	1.0604	1.0536	1.2486	1.1179	1.1584	1.0164	0.9033	0.581	0.6574	0.5177	0.4381	0.4301	0.5714	0.7155
5-aminovalerate	0.2803	0.42	0.2603	0.4997	0.2768	0.4752	0.5323	0.5276	0.4306	0.5138	0.3668	0.7349	1.0679	0.9816	0.7389	0.7983	0.9051	1.2148	1.2545	1.3748	0.8893	0.9343	0.8708	0.8197	1.3443	1.3517	1.3629	1.2024	1.3228	1.2178	1.3039
5-HETE	0.1859	0.4931	0.2081	0.5762	0.1602	0.5914	0.467	0.7549	0.4119	0.6992	0.3115	1.1263	1.4857	1.5511	1.1421	1.3908	0.9828	1.6879	1.0235	1.609	2.4561	1.4884	1.7887	1.1339	1.666	0.8338	0.8816	0.5942	0.7176	0.9095	0.9937
5-hydroxyindoleacetate	0.1307	0.1886	0.1782	0.2326	0.1459	0.2927	0.3169	0.3174	0.2465	0.237	0.9984	0.9259	0.9448	0.9418	0.7791	0.834	1.0881	1.2285	1.4113	1.8686	1.7293	1.88	1.8805	1.5072	0.9431	0.705	1.1082	1.0789	1.0016	0.8962	1.2884
5-KETE	0.5375	0.5559	0.268	0.6181	0.268	0.7056	0.7144	0.7914	0.531	0.598	0.268	1.3526	1.1251	1.4311	0.9893	1.4163	1.1875	1.4759	1.1298	1.3549	1.524	1.444	1.2324	0.9986	1.6448	0.8897	1.1711	0.7137	0.6384	0.9804	0.6337
5-methyl-2'-deoxycytidine	0.7939	1.0705	0.7819	1.1651	0.7432	1.0122	1.2562	0.8947	1.0716	1.21	0.7563	0.9048	1.0349	0.9878	1.0142	1.1589	1.2391	1.8148	1.3302	2.4628	1.7642	2.2628	1.7439	1.3513	0.3191	0.3114	0.2893	0.3213	0.2709	0.7052	0.3382
5-methylcytidine	0.7098	0.8605	0.6824	1.1077	0.858	0.8831	0.8604	0.7006	0.7154	0.7575	0.9014	1.1306	1.3165	1.2003	1.1439	1.3605	1.4753	1.2557	1.2286	1.4558	1.2933	1.4327	1.2044	1.0479	0.5854	0.4491	0.5424	0.5025	0.4638	0.6313	0.6193
5-methyltetrahydrofolate (5MeTHF)	0.2368	1.2262	1.0596	1.8327	1.0375	0.9213	1.025	0.8187	0.5254	0.9161	0.8565	0.7254	0.6187	0.8787	0.639	1.1718	1.0607	1.2033	1.0182	1.3383	1.4395	1.5269	1.2885	1.0133	0.8624	0.8122	0.9267	0.9158	0.6405	1.1199	1.2559
5-methylthioadenosine (MTA)	0.8016	1.2773	0.8793	1.4655	1.1627	0.9957	1.0491	0.8547	0.9327	1.0501	0.7709	1.0043	1.1803	1.1074	1.1353	1.3041	1.2575	1.128	1.1695	1.5524	1.278	1.4529	1.2475	1.0175	0.6653	0.6284	0.5556	0.4584	0.4817	0.6535	0.8229
5-oxoproline	0.3372	0.2829	0.3138	0.5165	0.2923	0.2868	0.3211	0.1586	0.2225	0.2964	0.4384	0.5336	0.5537	0.5082	0.6356	0.6364	0.6841	1.5404	1.4852	1.7397	1.6543	1.8553	1.5267	1.2968	1.5456	1.0806	1.0651	1.1202	0.9349	1.2211	1.6675
5-phosphoribosyl diphosphate (PRPP)	0.47	0.588	0.6109	0.8885	0.6799	0.6031	0.655	0.6044	0.6173	0.6907	0.6539	0.2483	0.34	0.5966	0.1461	0.4162	0.4599	0.9285	1.0121	0.962	1.1944	1.1825	1.3933	1.2158	1.4244	1.354	1.6247	1.4362	1.3837	1.5513	1.4655
6-phosphogluconate	0.5201	0.9812	0.7127	0.6822	1.2841	2.1252	1.5966	1.652	1.4287	1.3167	0.8899	1.5562	1.1591	1.4398	1.008	1.8107	1.9196	0.6091	0.668	1.3268	1.0076	0.9557	1.1798	1.0627	0.4969	0.4854	0.6888	0.3524	0.3798	0.5937	0.4808
7-hydroxycholesterol (alpha or beta)	0.8805	0.91	0.8809	0.9548	0.7975	0.9924	1.127	1.0747	0.7606	1.0349	0.3906	1.7576	1.7163	1.9535	1.433	1.7777	1.7156	1.1549	0.9676	1.018	1.209	1.1662	1.0575	0.8774	0.9965	0.7676	0.9657	0.9299	0.8331	0.8843	0.8937
7-methylguanine	3.4954	4.7094	3.8071	4.9816	4.4242	2.2881	2.6172	1.7944	2.0335	1.9151	1.1887	1.8665	1.9152	1.4154	1.6908	1.6324	1.802	0.8855	0.8351	1.1945	0.9289	0.9671	0.9756	0.7741	0.5745	0.5152	0.4693	0.5418	0.4344	0.5964	0.6726
acetylcarnitine (C2)	0.9511	1.1035	0.7455	1.3282	0.8554	2.285	2.5055	2.4294	2.1486	2.2936	1.8985	1.9824	2.0842	1.778	1.7424	1.8553	1.8778	0.7263	0.7536	0.8558	0.9219	0.6148	1.1054	0.8501	0.9068	0.7913	1.0021	0.8505	0.908	0.8818	0.6396
acetylphosphate	0.355	0.5569	0.5505	0.3777	0.5518	0.6759	0.2895	0.6784	0.541	0.5084	0.8255	1.0443	1.184	1.1923	1.171	1.0924	1.2174	0.8767	1.0265	1.13	1.1491	1.4161	1.0856	1.0663	0.8032	1.1615	1.0454	0.6449	0.9706	0.7376	1.6854
aconitate [cis or trans]	0.4712	0.4759	0.4446	0.5571	0.425	0.464	0.2551	0.4764	0.4657	0.5348	0.4945	0.905	0.8437	0.8703	0.8923	0.5842	0.7213	1.1744	1.0912	1.2455	1.1736	1.1612	0.9766	1.0478	2.3266	2.2548	2.0601	2.5105	2.3237	2.2827	2.6177
adenine	0.3673	0.3036	0.3302	0.2852	0.2776	0.3266	0.3425	0.3313	0.3552	0.3326	0.5761	0.433	0.4904	0.3966	0.3969	0.3993	0.4014	1.3607	1.2234	1.2425	1.1113	1.6115	1.0275	0.9725	2.476	2.5584	2.4932	2.1684	2.1833	2.4337	2.9553
adenosine	1.8295	1.8898	1.9737	1.822	2.3452	1.7588	1.8169	1.8406	2.6802	2.0439	0.7124	1.1576	1.1397	1.0211	0.4751	0.9838	1.0162	0.4074	0.4086	0.4793	0.3592	0.4319	0.436	0.3462	0.6538	1.1267	2.4823	1.2086	0.8927	0.7544	1.6241
adenosine 2'-monophosphate (2'-AMP)	0.7193	0.5746	0.6656	0.8436	0.4247	0.4831	0.4524	0.5329	0.3958	0.7269	0.7754	1.076	0.782	1.2965	0.6535	1.0844	1.0946	0.9534	0.7379	0.8234	1.4648	1.3344	1.4575	1.0625	1.0425	0.8648	1.1568	0.8821	1.0468	1.1876	1.4469
adenosine 3'-monophosphate (3'-AMP)	0.8021	0.5123	0.7847	0.7991	0.6181	0.4866	0.6616	0.6421	0.4487	0.6841	0.663	0.752	0.6169	0.8219	0.5203	1.0156	0.9208	1.0704	0.9932	1.2022	1.2554	1.5842	1.3642	0.9148	1.1512	1.0727	1.3513	1.271	1.026	1.2104	1.5588
adenosine 5'-monophosphate (AMP)	24.1723	20.9182	21.8382	27.3086	21.4516	19.4149	22.7373	20.5952	21.8724	24.0014	1.6632	4.3974	2.2298	3.0614	1.8066	5.0122	4.4993	0.885	0.7646	0.9798	0.9699	0.9941	0.9245	0.6736	0.6166	0.6896	0.6265	0.4747	0.6331	0.5899	0.8004
adipate (C6-DC)	5.878	7.021	6.0394	9.2106	1.3157	1.2008	1.3383	1.8344	1.4438	1.8229	0.3944	0.9317	0.9832	1.2397	1.4216	0.9835	1.2929	0.3944	1.0586	1.0447	0.5433	1.1586	0.6084	1.0923	0.6393	0.6439	0.5769	0.3944	0.6231	0.3944	0.7977
adrenoylcarnitine (C22:4)	0.3387	0.5461	0.3387	0.6253	0.3665	0.9261	1.0287	0.6537	0.3387	0.7492	1.202	0.8816	1.0711	0.9229	0.8955	0.656	0.7177	1.4987	1.6824	1.1577	0.9405	1.3424	1.1444	0.7056	1.3613	1.0829	0.9713	1.5747	0.7991	1.2116	0.6103
alanine	1.0914	1.1186	1.0813	1.2244	1.3967	0.8721	0.9775	0.6708	0.813	0.8312	0.9355	1.0058	1.1005	0.8359	1.0382	1.1015	1.1323	1.2515	1.1521	1.3043	1.0494	1.1674	1.0102	1.0147	1.0161	0.9845	0.838	0.7764	0.7521	1.0003	0.9263
alanylglycine	0.9408	1.0682	0.2992	1.7945	0.5364	0.9736	0.3869	0.5981	0.2992	0.7302	0.2992	0.6057	0.8033	1.0623	0.864	0.6964	0.8129	1.1044	1.1112	1.2327	1.3916	1.0086	1.3177	0.2992	0.7102	0.9092	1.2004	0.954	1.2316	0.5641	1.5913
allantoin	5.6717	8.5533	6.194	7.4723	4.9327	2.4782	3.1858	2.5892	1.772	2.4833	1.3259	2.0547	1.8817	1.9117	1.9466	2.3416	2.3781	0.854	0.7485	0.9068	1.0745	0.9918	0.7155	0.5413	0.4092	0.3457	0.4188	0.3499	0.3472	0.4877	0.4804
allo-threonine	0.5105	0.4843	0.4664	0.7822	0.3665	0.7536	0.7802	0.7002	0.6509	0.7102	0.9989	1.076	1.1825	1.1536	1.114	1.2833	1.455	1.4633	1.2053	1.4636	1.4666	1.5413	1.1594	1.2126	0.9193	0.7678	0.7268	0.8124	0.6911	1.0661	1.0011
alpha-hydroxyisovalerate	2.5459	3.4162	3.268	4.7041	2.8612	1.3169	2.0241	1.0678	1.3726	1.6819	0.4656	1.1222	0.9647	0.91	1.1247	1.173	1.1662	1.1547	0.8396	0.5832	1.0734	1.0022	1.0823	1.0161	0.2062	0.3261	0.3273	0.3244	0.2062	0.2774	0.2062
alpha-ketoglutarate	1.69	1.3346	1.3511	1.5034	1.1125	1.2784	1.7792	1.2052	1.6677	1.5205	0.5521	1.1078	1.8277	1.7346	1.2763	1.4209	2.0216	1.0245	0.9396	1.0242	0.8866	1.0146	0.9346	0.7729	0.6373	0.657	0.6717	0.6565	0.5547	0.6525	0.6829
alpha-tocopherol	0.0108	0.0396	0.0249	0.0557	0.0449	0.1575	0.1508	0.1069	0.1355	0.1615	0.686	0.1664	0.2083	0.1365	0.2491	0.2073	0.1261	1.1629	0.8913	1.4542	1.0824	1.3282	1.0974	0.9216	2.2654	2.3917	2.1097	2.0281	1.862	2.3455	2.3389
arabinose	0.4014	0.7156	0.4026	0.8302	0.3508	0.3744	0.4321	0.362	0.3045	0.4217	1.0915	1.2404	1.2576	1.1403	1.3042	1.2906	1.4292	1.4464	1.0594	1.3925	1.2637	1.3156	1.2469	0.9908	0.8333	0.8984	0.8775	1.0092	0.6389	0.9835	1.0301
arabitol/xylitol	0.6972	0.8702	0.6251	1.255	0.554	0.4215	0.5946	0.3918	0.3896	0.5653	0.9032	0.9412	0.8715	0.9571	0.9895	1.0687	0.9761	1.3608	1.2519	1.3	1.1616	1.0226	1.2052	1.0392	1.2617	1.0105	1.2392	1.5237	0.8891	1.5585	1.3541
arabonate/xylonate	0.9985	1.1884	0.8317	1.7723	0.9151	0.5733	0.9038	0.5928	0.6104	0.8364	0.9001	1.1022	1.0749	0.9968	1.023	1.2879	1.2994	1.526	1.2715	1.6122	1.2087	1.375	1.1899	0.9209	0.978	0.7698	0.8287	0.8892	0.6121	1.0635	0.9557
arachidonoylcarnitine (C20:4)	0.0586	0.0534	0.0343	0.0897	0.0482	0.2289	0.3027	0.2029	0.2319	0.207	1.7328	1.1665	1.2207	1.0196	0.9093	0.7489	0.873	1.7004	1.5494	1.6104	1.5226	1.6473	1.3195	1.2449	1.1927	0.7815	0.9323	0.9445	0.8828	0.8807	0.8777
argininate	0.1377	0.2438	0.1619	0.3081	0.2005	0.1806	0.269	0.1814	0.2514	0.2546	0.1857	0.3015	0.3442	0.2133	0.393	0.4153	0.4638	0.9583	1.2179	1.6139	1.1051	1.208	1.0957	1.0216	1.5513	1.8395	1.2471	1.0069	1.0046	1.5474	1.5658
arginine	0.5145	0.6371	0.4692	0.7196	0.5137	0.6678	0.6157	0.5327	0.5326	0.5889	0.7369	0.935	0.9725	0.8368	0.9395	0.9795	1.0205	1.275	1.2268	1.4812	1.3502	1.5239	1.2473	1.1798	1.2072	1.1113	1.0235	0.881	0.9178	1.1128	1.3333
argininosuccinate	0.5989	0.777	0.4975	0.8624	0.5077	0.6885	0.7875	0.6224	0.629	0.8253	0.9233	1.3211	1.2373	1.0242	1.1265	1.3625	1.3085	1.9972	1.5629	2.5328	2.1087	2.4162	1.6382	1.4497	0.9555	0.8909	0.81	0.6581	0.5831	1.0246	1.2458
asparagine	0.9172	1.1982	0.8584	1.1541	0.8805	0.9219	0.9992	0.8266	0.8481	1.0421	1.1535	1.1272	1.1229	0.941	1.2674	1.3326	1.422	1.3406	1.0675	1.3089	1.1991	1.4004	1.3333	0.9543	1.0697	0.8437	0.7577	0.7785	0.654	0.825	0.9428
asparaginylalanine	1.8137	2.0424	1.3455	1.7075	1.1778	1.8954	1.1407	1.4453	0.8869	1.3213	1.1507	0.8696	1.1227	1.1539	1.1591	1.8594	1.2472	0.7188	0.7912	1.2169	1.2497	1.2403	1.2991	0.9712	0.9603	0.5823	0.8501	0.4761	0.6307	0.4439	0.9758
asparaginylglutamate	0.663	1.2709	0.3328	0.988	1.0766	0.9125	0.9432	0.7135	0.7051	0.5475	1.1185	1.5293	1.7618	1.4825	1.4359	1.2992	1.6622	1.4662	0.9014	1.1236	0.9947	1.1551	1.0956	1.2009	0.7601	0.7771	0.642	0.3937	0.6175	0.3328	0.3328
aspartate	0.4774	0.566	0.444	0.7407	0.4871	0.5377	0.5268	0.4191	0.4638	0.4911	0.7723	0.8259	0.8577	0.9249	0.9954	1.0002	0.9998	1.4976	1.5057	1.7279	1.7389	1.7416	1.6128	1.3735	1.0761	0.9846	1.1144	1.065	0.9024	0.9855	1.356
aspartylaspartate	0.3856	0.5284	0.2955	0.6411	0.6039	0.4324	0.5903	0.3448	0.461	0.4391	0.7401	0.88	0.9314	0.7863	0.9936	1.1391	1.2792	1.422	1.4138	1.8509	1.3989	1.7749	1.2039	1.2357	1.5918	1.2513	0.8878	0.9362	0.9142	1.2008	1.243
aspartylglycine	0.6081	1.0847	0.8408	1.3625	1.2413	0.6525	0.9927	0.6163	0.7928	0.7186	1.2731	0.8857	1.3429	1.0198	1.4522	1.637	1.6604	1.3851	1.3361	1.9076	0.9998	1.6465	1.1567	1.3258	1.2527	0.7742	0.6592	0.5105	0.4456	0.943	0.7366
azelate (C9-DC)	1.5546	1.7201	1.0622	8.6299	0.9866	0.8554	1.1041	1.6245	1.4508	1.1034	0.6233	0.6139	0.8922	0.9156	0.8105	0.8143	0.9481	1.1224	1.3764	1.5442	1.2183	1.1412	1.2077	0.8578	0.9377	0.8764	0.9319	1.0117	0.9791	1.1897	1.0038
benzoate	1.2001	1.1232	1.3314	1.4585	1.2508	0.8052	0.9029	0.8871	0.6601	1.126	0.6731	0.9408	0.6782	0.5307	0.8579	0.8181	3.2032	1.1845	0.9651	3.5137	0.6996	1.2667	1.0249	0.8916	0.7934	0.8357	1.1622	1.3362	0.7532	1.1314	1.0337
beta-citrylglutamate	5.8356	6.4565	5.6157	7.5442	5.6432	5.6682	5.7195	4.9544	5.1792	5.65	1.7271	1.7883	1.653	1.7713	1.9321	2.1068	2.1428	0.9136	0.8291	0.9799	0.9519	0.9983	1.0198	0.9338	0.4839	0.4087	0.3882	0.4015	0.3663	0.4813	0.5003
beta-hydroxyisovalerate	1.2004	1.3474	1.1435	2.082	1.0131	1.0632	1.243	0.9715	1.0891	1.2187	0.8398	1.091	1.3606	0.8827	1.1529	0.9941	1.1734	1.1425	1.1036	1.1521	0.8303	1.2406	0.9615	0.8985	0.6428	0.5303	0.6962	0.7098	0.5789	0.6889	0.7489
betaine	0.6406	1.0254	0.6728	1.1569	0.6853	0.7851	0.9608	0.758	0.9587	0.8751	0.8665	1.2923	1.1647	1.1175	1.1382	1.1913	1.2375	1.3712	1.3756	1.7346	1.3606	1.4894	1.1991	1.0249	0.7823	0.7397	0.732	0.5036	0.5963	0.8753	1.0121
betaine aldehyde	0.1947	0.1281	0.1281	0.1281	0.1588	0.3093	0.2852	0.3979	0.1281	0.303	0.3967	0.3149	0.2374	0.4036	0.522	0.3236	0.3325	1.6014	1.4462	2.0838	1.6204	2.1039	1.3819	0.9875	1.0575	1.064	1.0565	0.9463	1.0765	0.8523	1.9977
butyrylcarnitine (C4)	3.4071	2.5581	1.9799	1.9028	2.4704	11.1646	11.0165	7.7001	7.5984	7.3581	4.3223	4.3114	3.5334	3.7608	4.3873	3.5663	3.5507	0.7616	0.5338	0.6064	0.9815	0.3817	0.9445	0.5977	0.4343	0.6141	0.6313	0.0878	0.4674	0.0878	0.0878
C-glycosyltryptophan	0.5356	0.6051	0.4752	0.7282	0.4842	0.5728	0.6328	0.5676	0.5545	0.5751	1.0221	1.0322	0.9225	1.0698	0.9466	1.1602	1.1825	1.5568	1.4185	1.8753	1.6488	1.8	1.5279	1.293	0.9305	0.7533	0.8687	1.0167	0.6722	1.0765	1.0142
caprate (10:0)	0.9205	1.1272	0.9397	1.3792	1.1825	1.2558	1.2422	1.3036	1.0594	0.9524	0.8414	1.0263	1.2675	0.9309	1.1585	1.0071	1.1711	0.9938	1.2435	1.1542	1.026	1.2612	1.3198	1.0338	0.8405	0.9357	0.8409	0.6949	0.705	0.7526	1.0381
caproate (6:0)	1.0103	1.2972	1.3979	1.7837	0.9897	1.1362	0.9374	1.2807	0.8185	1.0917	0.4186	1.1544	1.2218	1.0923	1.3821	1.3754	1.3313	1.3574	0.8181	1.2602	1.0266	1.2094	1.0967	0.8915	0.3205	0.3739	0.3819	0.5379	0.4282	0.5291	0.5349
carboxyethyl-GABA	0.6409	0.7258	0.4498	0.7287	0.3231	0.7491	0.6031	0.9302	0.2123	0.9796	0.5732	0.7362	0.7533	1.1805	1.0377	0.9368	1.134	0.9469	1.0864	1.4166	1.2045	1.284	1.2993	1.0985	1.3046	1.0006	1.0127	0.7995	1.1988	0.9634	1.2688
carnitine	0.2179	0.2267	0.2042	0.2695	0.2107	0.9268	0.8864	0.8214	0.8449	0.8547	1.2325	1.2781	1.3492	1.3114	1.1595	1.0618	1.239	1.0554	1.0383	1.3429	1.2256	1.2468	1.1438	0.9479	0.6789	0.6837	0.6655	0.6782	0.6378	0.6433	0.6726
chiro-inositol	1.0947	1.6183	1.1635	1.6279	1.1716	0.3276	0.3241	0.3605	0.2571	0.3297	0.2586	0.2853	0.2865	0.1356	0.4114	0.3777	0.4614	1.2186	1.3984	1.7637	1.2091	1.8609	1.2625	1.1768	0.7887	1.0632	0.8351	0.7376	0.815	1.1659	1.2521
cholesterol	0.1398	0.1892	0.1338	0.2046	0.1334	0.2359	0.2356	0.1865	0.1795	0.2204	0.5633	0.635	0.6471	0.5611	0.6823	0.7094	0.6928	1.1968	1.179	1.2632	1.326	1.3814	1.1221	0.9844	1.2529	1.1079	1.1221	1.0442	0.9612	1.0939	1.3312
choline	0.9157	1.1017	0.8439	1.1115	0.775	0.943	0.9875	0.9423	0.9155	1.0125	0.7628	0.9611	0.9707	0.9774	1.0607	1.2182	1.1956	1.1868	1.2455	1.4187	1.3413	1.3969	1.3676	1.1238	1.0378	0.9229	0.915	0.8568	0.8649	0.9476	1.0536
choline phosphate	1.0117	1.1235	1.0151	1.2757	0.8609	0.9346	0.9217	0.8911	0.8659	0.9587	0.8409	0.9313	0.8965	0.916	1.0202	0.9903	1.0421	1.131	1.1138	1.219	1.18	1.2606	1.1125	1.0379	1.0282	0.9867	0.9604	0.9457	0.9439	0.9317	1.0484
citrate	0.3289	0.3335	0.2596	0.3738	0.2847	0.3683	0.4192	0.4316	0.3934	0.4404	0.5691	0.8962	0.8111	0.8847	0.9861	0.7753	0.7268	1.0622	1.0403	1.1661	1.1046	1.137	0.9557	1.04	2.1488	2.0131	1.941	2.3166	2.1157	1.9948	2.4489
citrulline	1.2989	1.2743	1.2245	1.525	1.3168	1.2423	1.3416	1.099	1.2146	1.2751	1.111	1.1628	1.1559	1.0113	1.0033	1.164	1.2816	0.8283	0.9623	0.9529	0.9112	0.9408	0.8633	0.8178	0.4155	0.4451	0.3403	0.4003	0.3994	0.4341	0.4632
coenzyme A	0.1179	0.2293	0.1648	0.2259	0.2433	0.2452	0.2215	0.1808	0.1384	0.301	0.4975	0.6536	0.6116	0.6345	0.708	0.5599	0.5606	1.298	0.833	1.2713	1.3569	1.5031	1.2661	0.9829	1.2752	1.2718	1.2105	1.3978	1.4484	1.5497	1.7552
creatine	0.6642	0.7194	0.6851	0.8163	0.6814	0.7691	0.7636	0.742	0.7003	0.7889	0.8572	0.926	0.929	0.9072	0.8965	0.9422	0.9911	1.0917	1.0341	1.1253	1.1085	1.1806	1.0771	1.015	1.0354	1.0402	1.014	1.0258	0.9881	1.0297	1.1214
creatinine	0.6101	0.7362	0.6921	0.8268	0.7084	0.7098	0.7338	0.6465	0.6942	0.6771	0.7869	0.8744	0.9216	0.8374	0.9392	0.9182	1.0599	1.2514	1.2782	1.422	1.3914	1.3862	1.1973	1.1155	1.3701	1.0654	1.0274	0.9726	0.9583	1.2068	1.3245
cystathionine	7.828	8.6137	7.559	11.3531	8.1306	5.1169	4.9224	3.8518	4.4881	5.7634	1.3887	1.8749	1.9958	1.4405	1.5329	1.6007	2.0352	0.7547	0.6644	1.0052	0.8481	1.1187	0.9399	0.738	0.5668	0.4885	0.4558	0.381	0.3914	0.5606	0.6933
cysteine	0.0839	0.1539	0.0876	0.1854	0.1204	0.1417	0.1233	0.0865	0.1348	0.1176	0.6398	0.2851	0.34	0.2307	0.4026	0.3278	0.377	1.0636	1.0773	1.4931	1.1704	1.3851	1.037	0.9961	1.4642	1.4288	1.1868	1.0039	1.0881	1.4013	2.0783
cysteine sulfinic acid	0.5275	1.1401	0.5566	1.4547	0.7285	0.3769	0.7584	0.3386	0.2125	0.2787	0.2125	0.8247	0.788	0.8309	0.7383	0.8977	1.0008	2.2148	2.0978	1.5724	1.9914	1.4019	1.4915	1.3453	1.2284	0.7799	1.1392	1.2735	0.9156	1.1135	0.6846
cysteine-glutathione disulfide	0.789	0.9452	0.7853	1.1322	0.6046	0.3172	0.41	0.3116	0.3817	0.4642	0.2341	0.4236	0.4495	0.494	0.4839	0.5121	0.5298	1.1699	1.3624	1.4483	1.1833	1.071	1.1104	0.9329	2.1618	1.6838	2.0779	1.7469	1.7579	1.6974	1.9392
cytidine	0.9967	1.2175	0.9607	1.3482	0.9652	0.9468	0.9419	0.8125	0.8374	1.0165	0.8933	1.0298	1.0661	1.0051	1.0723	1.0968	1.2417	1.182	1.1885	1.3487	1.2829	1.4013	1.291	1.1273	0.8556	0.8117	0.7869	0.7167	0.6778	0.8123	0.984
cytidine 2',3'-cyclic monophosphate	4.1734	5.5521	3.9007	6.9319	4.6106	1.0513	1.3531	1.0275	1.036	1.3946	0.4941	0.6273	0.9692	0.8804	1.1347	1.2555	1.4994	0.9591	1.1088	1.4888	1.5757	1.9243	1.3196	0.9835	0.3911	0.4669	0.4174	0.5127	0.4365	0.5894	0.8461
cytidine 5'-diphosphocholine	0.6774	0.8768	0.4923	0.6929	0.6271	0.9991	1.0546	0.6736	0.6321	0.7938	1.2469	1.2435	1.3269	1.1788	1.3306	1.3621	1.1784	1.4975	1.0124	1.3088	1.1515	1.3903	1.0691	0.9357	0.8847	0.8233	0.7958	0.9371	0.7905	1.0597	0.9842
cytidine 5'-monophosphate (5'-CMP)	1.9849	2.452	2.1104	2.8471	2.319	1.5808	1.7153	1.6041	1.7486	1.9177	1.1404	1.1858	1.0623	1.1896	0.9925	1.3029	1.3724	0.9916	0.7588	1.0975	0.8809	1.0121	0.9307	0.7701	0.4472	0.4073	0.4267	0.4279	0.3674	0.468	0.4907
cytidine 5'-monophospho-N-acetylneuraminic acid	0.7684	0.902	0.6374	0.9747	0.6159	0.6748	0.7767	0.6052	0.4927	0.6569	1.0253	1.3007	1.2604	1.1781	1.2154	1.3984	1.4686	1.5022	1.3345	1.539	1.5855	1.688	1.3261	1.1324	0.7247	0.6696	0.6147	0.685	0.6069	0.7495	0.8254
cytidine-5'-diphosphoethanolamine	0.6233	0.8329	0.6416	1.0016	0.6021	0.8797	0.9109	0.6263	0.6456	0.7721	1.1833	1.1827	1.1865	1.1438	1.2632	1.3514	1.3749	1.3679	0.9842	1.3458	1.2808	1.2801	1.2371	1.0336	0.8515	0.8461	0.7478	0.9006	0.6676	1.0363	0.8308
cytosine	2.9335	3.0155	3.3123	3.3402	2.7091	1.643	2.0152	1.8475	1.9402	2.3365	0.193	0.6515	0.7205	0.7692	0.6239	0.9975	0.754	1.0318	0.9291	1.1925	1.2257	0.8396	1.2722	0.9951	0.2584	0.193	0.193	0.193	0.193	0.193	0.193
dehydroascorbate	0.4914	0.5825	0.3932	0.651	0.5699	0.7535	0.7039	0.5828	0.6133	0.7565	0.7474	0.9867	0.9926	1.1204	1.1465	1.1155	0.9501	1.1724	1.1297	1.0889	1.2355	1.0759	1.0534	1.117	0.8524	0.9684	0.9625	1.3924	0.9896	1.0226	1.0837
deoxycarnitine	0.3782	0.4972	0.4627	0.5727	0.4221	0.4237	0.5047	0.3855	0.4556	0.4404	0.9245	1.1765	1.1557	1.1681	1.0372	1.1111	1.2839	2.0451	1.8116	2.3774	1.9716	1.9106	1.9531	1.603	0.9029	0.8006	0.8904	0.9671	0.5262	0.8429	0.7847
desmosterol	1.4787	1.9602	1.3618	2.1281	1.3986	3.1586	3.2315	2.4189	2.3617	2.8289	1.2625	1.3761	1.3882	1.4934	1.6327	1.7391	1.3926	0.8581	0.8444	0.9262	0.9443	1.0694	0.7784	0.6488	0.7177	0.5767	0.4632	0.4485	0.4349	0.6599	0.7124
dihydroxyacetone phosphate (DHAP)	0.1644	0.2551	0.1571	0.2171	0.1735	0.2598	0.2645	0.2408	0.2355	0.371	0.8691	0.9804	0.8241	0.9248	1.0004	1.002	0.9348	1.1044	0.9721	1.3601	1.1597	1.0319	1.2588	1.2056	1.265	1.7154	1.3061	1.2821	1.258	1.4081	1.5498
dimethylarginine (SDMA + ADMA)	2.3255	3.002	2.1166	3.2441	2.1849	1.5816	1.47	1.2114	1.2608	1.2882	0.7833	0.9922	1.038	0.8856	0.9477	1.1324	1.1451	1.0685	1.0259	1.3254	1.2388	1.3754	1.2032	0.925	0.7147	0.6917	0.6225	0.5472	0.5764	0.6202	0.8595
dimethylglycine	2.6499	5.3504	4.0272	4.7199	3.1009	2.5232	4.3418	2.4194	2.3935	2.8526	1.7829	3.2063	2.8224	2.5966	2.4578	3.4869	2.8455	0.7131	0.6282	0.8065	0.9971	0.7729	1.0308	0.8512	0.273	0.3273	0.2638	0.3136	0.283	0.3382	0.4254
dopamine 3-O-sulfate	1.2779	1.8008	1.2113	1.9666	0.9721	1.1315	1.1439	1.0623	0.9187	1.9623	0.3352	0.6865	1.0237	1.5501	1.5885	1.2187	0.9966	1.0193	0.9834	1.5787	1.4317	1.361	1.1832	0.8611	0.4039	0.3489	0.4399	0.3514	0.3081	0.5616	0.4063
eicosanoylsphingosine (d20:1)	0.0419	0.0723	0.0389	0.0677	0.0403	0.0661	0.0802	0.0651	0.0428	0.0691	0.5703	0.627	0.6195	0.5512	0.6359	0.5973	0.602	1.0882	1.2305	1.1916	1.3001	1.2483	1.0725	1.0235	1.4163	1.1591	1.2196	1.2002	1.0901	1.1051	1.2891
eicosenoylcarnitine (C20:1)	0.1688	0.1778	0.1081	0.1969	0.1034	0.276	0.3226	0.1668	0.1812	0.2199	0.583	0.4538	0.6017	0.4155	0.44	0.4992	0.3892	1.3255	1.1768	1.1907	1.143	1.4753	0.9936	0.8797	1.4415	1.1682	1.0935	1.2089	1.1287	1.1849	1.0864
ergothioneine	0.4526	1.8607	0.8062	1.3428	1.0098	1.6225	2.2634	1.4931	0.8059	1.401	1.9738	1.5443	1.5302	0.9445	0.685	0.892	0.9902	0.3723	0.3798	1.1985	0.2329	1.3089	0.3127	0.2866	2.0726	1.5017	0.8899	1.1753	1.1192	1.2526	2.2899
erythritol	1.2833	1.4612	1.1565	2.2892	1.101	0.4703	0.9144	0.6916	0.7377	0.6413	0.4703	0.9934	1.0844	0.8823	0.9267	1.0619	1.355	1.4662	1.1487	1.2141	1.2178	1.2116	1.2351	0.873	0.8809	0.863	0.7313	0.6559	0.6155	1.1784	1.4557
erythronate	1.0153	1.3532	1.0337	1.681	1.0569	0.5412	0.6943	0.5227	0.5241	0.6351	0.78	0.7741	0.8183	0.7684	0.9065	0.901	0.901	1.5915	1.2493	1.5589	1.4574	1.4253	1.2764	1.1143	1.0995	0.9123	0.9098	1.0677	0.7784	1.0223	1.1204
ethylmalonate	1.0387	1.3056	0.9082	1.6051	0.6584	1	1.1364	0.4484	0.7921	0.8875	0.9349	1.2141	1.1787	1.3087	1.2426	1.1472	1.1744	2.1155	0.991	1.467	1.3356	1.8913	0.7605	0.7123	0.803	1.0889	0.7429	0.4484	0.4484	0.6436	1.322
flavin adenine dinucleotide (FAD)	0.4992	0.6217	0.5351	0.7439	0.5112	0.6157	0.6583	0.5537	0.643	0.6075	0.9975	0.8863	0.8357	1.0064	0.8289	1.0614	1.1367	1.2304	1.2585	1.5765	1.4514	1.3014	1.3266	1.2508	1.1211	0.8826	0.981	1.0025	0.794	1.0936	1.2315
flavin mononucleotide (FMN)	0.2087	0.2355	0.1991	0.3291	0.2304	0.3871	0.344	0.2277	0.3238	0.3497	0.6627	0.6267	0.8003	0.849	0.9341	1.03	0.9603	1.3049	1.4587	2.0605	1.7737	1.8672	1.9735	1.5922	1.2291	0.8493	1.1077	1.2342	0.97	1.1974	1.8883
formiminoglutamate	2.1197	2.8368	1.3122	2.8982	1.5143	0.7234	1.0349	0.735	0.9728	0.7575	1.0817	1.6434	1.5534	1.2221	1.4915	1.9166	2.7645	1.1122	0.8511	1.3628	0.7926	1.0088	0.9912	0.839	0.6477	0.668	0.3897	0.3003	0.4404	0.6254	0.5617
fructose	1.3312	1.5125	1.1073	2.3294	1.0577	0.8167	0.8023	0.9275	0.9832	1.1411	0.5319	2.1535	0.9884	0.6094	1.227	0.8766	1.0116	0.9127	0.8567	1.4272	1.2328	1.3344	1.4426	1.0241	1.0334	1.2269	0.897	0.8436	0.7534	0.9838	1.2072
fructose 1,6-diphosphate/glucose 1,6-diphosphate/myo-inositol diphosphates	0.1967	0.3246	0.2076	0.3062	0.2362	0.4532	0.4829	0.476	0.4225	0.5444	0.7113	0.8498	0.5552	1.2158	0.6512	1.1939	0.9637	0.9194	0.9671	0.7281	1.3608	0.9593	1.247	1.3208	1.8132	1.8444	1.9085	1.2847	1.3423	1.8353	1.9219
fumarate	0.7398	0.9439	0.7127	1.0392	0.755	1.025	1.0325	0.723	0.7457	0.9475	0.93	1.1609	1.2853	0.9678	1.2339	1.202	1.2325	1.4328	1.3741	1.4466	1.4059	1.5268	1.3675	1.1821	0.8963	0.9123	0.8543	0.9087	0.7629	0.9525	1.0221
galactitol (dulcitol)	0.8723	1	0.7355	1.1636	0.8866	1.1172	1.0667	0.8911	0.8696	1.0293	1.1658	1.3756	1.178	1.3035	1.6473	1.8306	1.718	1.3108	0.9225	1.2222	1.0717	1.3324	1.2498	0.9323	0.84	0.9614	0.8318	0.7937	0.6012	0.787	1.0187
gamma-aminobutyrate (GABA)	0.2556	0.3399	0.2524	0.3129	0.2609	0.4552	0.5205	0.4345	0.4553	0.4839	0.7346	0.7955	0.8328	0.7584	0.8726	0.8656	0.8863	1.2368	1.111	1.32	1.2029	1.2844	1.1636	1.0295	1.0821	0.9889	1.0615	1.0335	0.9574	1.0877	1.1903
gamma-glutamylglutamate	0.2124	0.2939	0.2333	0.3658	0.2769	0.2301	0.3525	0.22	0.2634	0.288	0.4727	0.4647	0.4886	0.3444	0.5301	0.5276	0.5819	1.8326	1.6154	1.902	1.2315	1.5264	1.1353	1.5482	2.031	1.4276	1.2123	1.0844	1.1909	1.7247	1.3813
gamma-glutamylglutamine	0.8391	1.3042	0.7983	1.4393	0.8126	0.3437	0.6898	0.3102	0.4878	0.6389	0.2791	0.2386	0.2075	0.2081	0.2766	0.2851	0.2954	1.043	0.9675	1.2088	0.9698	1.0293	1.1404	0.9768	1.4831	1.0761	1.1378	1.3482	1.029	1.4738	1.4079
gamma-glutamylglycine	0.3196	0.7254	0.4082	0.8499	0.3286	0.0932	0.2032	0.1782	0.0799	0.0773	0.0582	0.0463	0.0463	0.0546	0.0463	0.1055	0.0463	1.1647	1.0407	1.3013	1.212	1.301	0.9051	0.7279	1.5704	0.9177	1.2027	1.0886	0.9593	1.3525	1.3466
gamma-glutamylleucine	0.6939	1.1672	0.9536	1.4448	1.0394	0.3896	0.5132	0.242	0.3451	0.482	0.2312	0.2312	0.4325	0.2312	0.4606	0.6131	0.407	1.4483	0.9991	1.7851	1.4613	1.3743	1.2451	1.0419	1.2876	0.9024	0.8527	0.7762	0.6255	1.0541	1.2377
gamma-glutamylphenylalanine	0.2966	0.4331	0.2966	0.2966	0.2966	0.2966	0.2966	0.2966	0.2966	0.2966	0.2966	0.2966	0.2966	0.2966	0.3742	0.3677	0.2966	1.4542	1.1638	1.7361	1.2505	1.1142	0.9009	1.0768	1.04	0.7283	0.8179	0.6423	0.5098	1.0819	1.2482
gamma-glutamylthreonine	0.4566	0.7768	0.6801	0.8153	1.1754	0.5903	0.9365	0.4803	0.7835	0.6362	0.6822	0.8947	1.0855	0.5476	1.1087	1.1323	1.2844	1.6591	1.6591	2.024	1.0871	1.524	1.0985	1.43	1.7258	1.4138	0.6777	0.5656	0.87	1.4601	1.4181
gamma-glutamylvaline	1.3993	2.2744	1.6833	2.5834	1.7994	0.6298	0.7989	0.4	0.5866	0.9881	0.3245	0.2526	0.6357	0.4265	0.7621	0.6012	0.7181	1.2268	1.3111	1.6487	1.2632	2.0129	1.3351	1.2201	0.5298	0.9111	0.8913	0.6827	1.0057	0.7819	1.247
gamma-tocopherol/beta-tocopherol	0.1748	0.4123	0.1748	0.5682	0.3586	0.1748	0.2141	0.1748	0.2273	0.226	1.4178	0.6055	0.479	0.2009	0.6361	0.6823	0.3703	2.1536	1.7236	2.3416	1.7523	2.1346	1.9601	2.0019	0.8129	1.0292	0.8294	0.6166	0.8742	0.9708	1.3941
gluconate	0.7433	1.5306	0.7539	1.3645	0.8212	2.3782	2.6428	1.7587	1.9466	1.3225	1.0753	1.5114	1.2308	1.1214	1.6129	3.0625	1.7029	0.9752	1.5501	1.3603	1.1024	1.1764	0.9923	0.8707	0.4205	0.439	0.4219	0.2755	0.2687	0.4668	0.441
glucose	1.0015	1.5041	0.9985	1.3232	1.2622	0.8028	0.6627	0.9133	0.9541	0.8943	0.6198	1.3001	1.134	1.0732	1.6637	1.4578	1.6435	1.0641	0.9153	1.9865	1.5315	1.311	1.5586	1.2433	0.553	0.9322	0.6906	0.3501	0.4766	0.6933	0.8831
glucose 6-phosphate	0.118	0.1866	0.157	0.1122	0.2204	0.1621	0.247	0.2081	0.2654	0.1949	0.9592	1.3866	1.3265	0.7283	1.5753	1.6097	1.876	1.5845	1.171	2.2857	1.3096	1.4536	1.1072	1.2415	1.0324	1.1799	0.4378	0.3675	0.433	1.0368	0.6981
glucuronate	2.734	3.349	2.5955	4.2072	3.1044	1.9936	2.2921	1.8374	2.0501	2.1045	0.6557	1.0087	1.0016	0.863	1.158	1.0912	1.2288	1.0101	1.0614	1.3676	1.1698	0.9932	0.9152	0.8216	0.5501	0.5674	0.4503	0.5515	0.3802	0.301	0.6868
glutamate	0.6555	0.7084	0.6181	0.8339	0.6583	0.6795	0.6837	0.6197	0.5909	0.7225	0.8395	0.9386	0.9255	0.9835	0.9357	1.0388	1.0209	1.2224	1.1938	1.2785	1.2932	1.3321	1.3004	1.1394	1.0582	0.9892	1.0036	0.9964	0.9334	1.0423	1.1338
glutamate, gamma-methyl ester	0.5408	0.7538	0.5705	0.7204	0.7002	0.6308	0.6137	0.4954	0.535	0.5131	0.8331	0.8141	0.8705	0.7219	1.0574	0.7373	0.7544	0.9321	1.0488	1.701	1.1601	1.2626	1.156	1.0906	1.1322	1.6767	0.9922	1.0459	1.0908	1.2382	1.464
glutamine	0.8291	0.9929	0.7517	1.1269	0.6586	0.669	0.6665	0.5197	0.515	0.7201	0.7733	0.8004	0.7987	0.8213	0.8237	0.8692	0.8791	1.2598	1.2049	1.3281	1.2446	1.3525	1.2573	1.0794	1.1444	1.0336	0.9941	0.9378	0.9789	1.0314	1.2995
glutaminylglutamate	1.0022	1.0738	0.9533	1.4949	1.1947	0.9838	1.0938	0.8862	1.1788	1.0189	0.6008	1.4592	1.4187	1.2326	1.3188	1.5006	1.6603	1.1799	1.1859	1.0505	0.8506	1.0427	0.9225	1.0268	0.8086	0.7882	0.7176	0.6952	0.5298	0.8409	0.7012
glutarate (C5-DC)	1.1025	1.5192	1.1196	1.6534	0.7816	0.6548	0.7119	0.5281	0.4621	0.84	0.413	0.8092	1.1582	0.9149	1.0547	1.0051	0.8122	1.4155	1.4518	1.504	1.2427	1.4014	1.3736	0.9949	0.927	0.8436	1.1107	0.923	0.8259	0.9677	1.1607
glutathione, oxidized (GSSG)	0.9239	1.0926	0.7868	1.477	0.8981	0.9493	0.7819	0.6668	0.7378	0.8826	2.0362	1.0616	1.2253	0.7181	1.3787	1.1483	1.5149	1.3266	1.097	1.5831	1.2437	1.4771	1.4976	1.2167	0.9059	0.9579	0.8844	0.7504	0.9799	0.9505	1.1467
glutathione, reduced (GSH)	0.4525	0.5628	0.5286	0.6394	0.748	0.7239	0.7739	0.503	0.7649	0.6582	1.1625	0.9341	0.89	0.8557	0.9055	1.0229	1.0355	1.5394	1.383	2.1256	1.4963	1.7429	1.3569	1.5738	0.7955	0.917	0.5962	0.596	0.6899	1.0061	1.2631
glycerate	1.2903	1.5428	1.3369	2.0265	1.2396	1.0518	1.2311	1.0628	1.0179	1.2641	0.418	0.8689	0.9704	0.9433	0.9638	1.0887	1.323	1.1582	1.0877	1.1604	1.2	1.1658	1.0986	0.921	0.6491	0.5864	0.5714	0.6652	0.477	0.8116	0.5449
glycerol	0.4664	0.5913	0.3545	0.4371	0.3978	0.6225	0.4949	0.4839	0.4287	0.5626	0.6822	0.8982	0.9066	0.8851	0.9069	1.1988	0.9489	1.5047	1.1652	1.5166	1.307	1.7428	1.4843	1.2322	1.3045	1.1387	0.9282	0.9907	0.9429	1.2234	1.2147
glycerol 3-phosphate	8.2486	7.132	5.9847	8.7593	6.4722	3.626	3.8174	4.0869	3.0688	4.0011	0.4764	0.8986	1.1533	1.013	1.3699	1.4646	1.9084	0.8109	0.8446	0.8756	0.9126	1.0201	1.0346	0.8451	1.0572	0.9211	0.9276	0.9294	0.9715	0.9447	1.12
glycerophosphoethanolamine	0.6576	0.742	0.6252	0.7017	0.7237	0.6498	0.6197	0.5793	0.5647	0.6613	0.546	0.6108	0.641	0.6929	0.6147	0.7684	0.7035	1.0402	1.0259	1.1118	1.0893	1.1406	1.0813	0.9656	1.5306	1.6124	1.4836	1.3564	1.4373	1.3518	1.7233
glycerophosphoglycerol	0.6745	0.7505	0.6419	0.713	0.7105	0.9045	1.0049	0.7866	0.934	0.9517	0.8068	0.7691	0.7921	0.7787	0.7333	0.8604	0.8705	1.2204	1.2598	1.2946	1.2183	1.3407	1.2911	1.3108	1.1752	1.0283	0.9951	1.1249	1.104	1.1316	1.1773
glycerophosphoinositol	0.3345	0.443	0.2634	0.4213	0.3786	0.5083	0.5991	0.4803	0.5563	0.5783	0.7492	0.7812	0.84	0.6606	0.7918	0.9147	0.9759	1.2531	1.2409	1.3728	1.3337	1.289	1.1135	1.159	1.3146	1.1664	0.857	1.0742	1.051	1.1981	1.0866
glycerophosphorylcholine (GPC)	1.7494	1.9594	1.5627	1.7491	1.8887	1.2657	1.1424	1.0995	1.1502	1.3917	0.5059	0.3433	0.3264	0.4781	0.3245	0.7004	0.6256	0.8965	0.7579	0.9076	0.9276	0.9246	1.0339	0.8397	1.8465	1.884	1.6918	1.6558	1.7496	1.6665	2.131
glycerophosphoserine	0.1895	0.2321	0.1467	0.302	0.2664	0.3378	0.2917	0.2907	0.3055	0.336	0.9766	1.0813	0.9552	0.8576	1.2125	0.9942	0.8922	1.315	1.0921	1.4197	1.0052	1.2765	0.949	0.8449	1.1784	1.219	1.0344	0.9948	1.078	1.2372	1.3803
glycine	0.9385	1.1959	0.9218	1.3045	0.8725	0.6991	0.7488	0.6483	0.6151	0.7408	0.5665	0.5798	0.621	0.5463	0.6392	0.6549	0.6828	1.1461	1.0906	1.2623	1.1145	1.2596	0.9943	0.8848	1.281	1.0748	1.0965	1.0268	0.9686	1.2296	1.3315
glycylalanine	0.5102	0.7485	0.9616	0.8993	0.9574	1.3268	0.8692	0.2718	0.6793	0.4801	1.0084	1.5051	1.1466	0.513	1.1871	1.1984	1.4055	1.5566	1.2459	1.4111	1.3777	1.3354	1.2017	1.2235	0.9345	0.8541	0.6767	1.0183	0.2718	0.7466	2.3504
glycylaspartate	0.9588	1.2989	0.9563	1.5824	1.0913	0.9916	0.9558	0.7958	0.7154	0.84	0.7691	0.8659	1.033	0.783	0.9886	1.0297	1.0081	1.4142	1.2968	1.8336	1.4998	2.0371	1.5918	1.2946	0.8161	0.9718	0.828	0.723	0.7634	0.8782	1.3027
glycylglutamate	1.2583	1.5593	0.9897	1.7466	1.1098	0.9696	1.0103	0.8003	0.7042	1.0326	0.8555	1.0502	1.0456	0.864	1.1502	1.2371	1.2161	1.3316	1.1669	1.3444	1.3821	1.4307	1.2285	1.1754	0.895	0.7417	0.7674	0.7045	0.5509	0.7825	0.8941
glycylglycine	1.0587	1.4144	1.0724	1.4688	1.3858	1.2399	1.4521	0.8899	1.0664	1.072	0.8863	1.0065	1.0229	0.8918	1.1194	1.0193	0.9659	1.0582	1.2613	1.1117	1.0219	0.9592	0.8679	0.9361	0.9107	0.8666	0.9271	0.5596	0.5751	0.7843	1.1897
glycylserine	0.9795	1.2358	0.7015	1.2347	1.0541	1.0125	0.9094	0.754	0.8306	0.7812	1.0069	1.0558	1.0018	0.912	1.2441	1.1672	1.0659	1.0791	1.0556	1.2886	1.1894	1.4819	0.9014	1.0672	1.2335	0.9305	0.7479	0.5874	0.6679	0.8989	1.3111
guanidinoacetate	2.652	2.6645	2.3629	3.3607	2.1919	2.3948	3.9265	2.5128	2.2404	2.8445	0.8149	0.8587	1.1525	0.9407	0.9059	0.9309	1.0944	1.0893	1.0999	1.2133	0.9552	1.2942	1.011	0.9033	0.8883	0.8655	0.8377	0.751	0.844	0.8723	0.9438
guanine	7.2361	7.9121	7.8853	7.3283	7.7015	2.8898	3.7911	3.5074	4.1023	3.7833	1.0913	1.6478	1.7309	1.2299	1.6716	1.7718	1.7186	0.8711	0.8282	1.0567	0.5865	0.7775	0.726	0.8424	0.5473	0.7096	0.3539	0.4873	0.4195	0.5949	0.4771
guanosine	4.1412	5.0851	4.0479	5.2468	4.3761	4.6826	4.2678	4.2511	4.0817	3.7795	2.7947	3.3199	3.6204	3.401	3.1072	3.9002	3.8818	0.581	0.4999	1.0754	0.6848	0.9246	0.8752	0.6646	0.3433	0.3607	0.3116	0.3384	0.3365	0.4262	0.6509
guanosine 5'- diphosphate (GDP)	1.2737	1.5945	1.7415	2.229	1.4902	0.9497	1.0587	0.7767	0.7787	1.0978	1.7709	1.729	1.3081	2.0785	1.78	2.1626	2.2884	0.408	0.408	0.408	0.9575	0.9827	0.6195	0.9252	0.408	0.8635	0.989	1.011	0.7331	0.6831	1.2042
guanosine 5'- monophosphate (5'-GMP)	20.6322	25.3683	22.4636	30.3256	21.8467	25.8815	30.8617	23.6916	25.4009	27.3458	12.593	18.152	11.5599	13.2825	9.2668	19.8737	17.9807	0.6003	0.4287	1.0486	0.6289	0.7147	0.7143	0.5028	0.2781	0.4678	0.3248	0.276	0.3211	0.296	0.622
gulonate	10.5822	13.3699	10.4705	18.0853	11.2549	2.5026	3.2456	1.7953	2.3499	2.8887	1.1296	1.3756	1.1754	1.1599	1.2537	1.5482	1.4439	0.9568	0.7793	1.0694	1.1274	1.0074	1.1163	0.7981	0.5576	0.492	0.4499	0.4785	0.4299	0.6787	0.5772
heme	0.0834	0.2674	0.1727	0.4841	0.1052	0.067	0.067	0.067	0.067	0.067	0.693	0.067	0.067	0.067	0.0983	0.067	0.067	0.4551	0.8152	2.0827	1.0426	1.2558	0.9552	0.9123	1.3642	2.1182	0.9018	1.5911	1.2752	1.4065	1.7365
hexanoylcarnitine (C6)	0.529	0.3379	0.4891	0.8183	0.4004	0.8931	1.5517	1.1172	1.0724	1.0948	0.7279	1.6963	1.5294	0.944	0.6837	1.6635	1.7174	0.7208	2.0141	0.9301	1.0908	0.3379	1.023	1.0486	0.4927	0.6157	0.3379	1	0.9114	1.0284	0.9164
hippurate	0.3145	0.7133	0.2445	0.8457	0.302	0.5006	0.427	0.2445	0.2445	0.7365	1.1838	0.2445	0.459	0.2445	0.2445	0.4277	0.6297	1.3404	1.2798	3.3471	2.3137	2.904	2.0799	1.0104	0.9568	0.8972	1.2285	0.8616	0.7799	1.0165	1.1223
histidine	0.9193	1.1053	0.917	1.5165	0.8563	0.7747	0.699	0.7314	0.671	0.7223	1.3421	1.135	1.2707	1.2762	1.138	1.2972	1.3872	1.1094	0.9515	1.1207	1.1803	1.1889	1.0448	0.9851	0.8258	0.6812	0.6889	0.6147	0.6181	0.7634	0.8964
histidylglutamate	0.6618	0.8699	0.275	1.1568	1.0091	1.0002	0.9975	1.0287	1.1163	1.0563	0.968	1.1594	1.1897	0.9088	0.9615	1.173	1.4214	1.2871	1.2808	2.0804	1.3224	1.7178	1.6412	1.4103	0.7986	0.8353	0.8904	0.275	0.6403	0.7775	1.0195
histidylglycine	0.6252	0.9263	0.4905	0.6809	0.2453	0.6197	0.3335	0.2484	0.1797	0.3762	0.217	0.249	0.2793	0.1797	0.6989	0.1797	0.6334	1.0101	1.4252	1.5328	1.2773	2.7542	1.0601	1.2466	1.5083	1.0402	1.0599	0.4226	0.5938	1.3213	1.8684
homoarginine	2.8165	3.4055	2.2562	3.7851	3.8562	1.0021	1.0779	1.1092	0.8298	1.2515	0.9979	1.4679	1.3816	1.2749	1.5156	1.5647	1.6505	1.0073	0.7425	1.0079	0.9329	1.242	0.8641	0.9217	0.248	0.3043	0.2243	0.1687	0.2658	0.363	0.3655
homocitrulline	1.1516	2.1124	1.516	2.3419	1.5408	0.282	0.5592	0.2989	0.4752	0.3427	0.6028	1.0227	1.6983	1.0565	1.4711	0.6894	1.053	0.9734	1.0189	1.4517	1.36	1.1095	1.3263	0.6908	0.4006	0.715	0.8918	1.0509	0.6616	0.977	1.5586
homostachydrine	0.7294	1.1829	0.874	1.6869	1.7862	0.234	0.5637	0.2351	0.2507	0.2436	0.9336	1.0831	1.0968	0.4313	1.2836	1.4495	1.8126	3.2305	2.9939	5.1147	1.5001	3.2602	0.96	2.0455	1.2944	1.0276	0.4035	0.3174	0.5919	1.005	0.7452
hypotaurine	1.2593	1.37	1.0108	1.1698	1.245	0.6979	0.9892	0.6389	0.833	0.941	1.428	1.122	1.1958	0.9847	1.0765	1.0589	1.1789	1.172	0.859	1.3234	0.8795	1.1848	1.2899	1.0804	0.5202	0.5214	0.4237	0.5443	0.484	0.6302	0.6962
hypoxanthine	0.322	0.3789	0.3554	0.3488	0.3833	0.5033	0.4728	0.4133	0.4065	0.434	1.0026	1.0779	1.2229	0.9341	1.2361	1.0674	1.1083	1.1997	1.1523	1.3544	1.0771	1.3112	1.0369	1.0777	1.0002	1.1091	0.8298	0.7062	0.8522	0.9395	1.1082
imidazole lactate	0.8584	1.066	0.9115	1.6101	1.1292	1.097	1.2119	0.8448	1.3113	1.0339	1.7527	2.0034	2.1407	1.8493	2.885	3.2758	2.9966	1.0055	0.779	1.0691	0.8831	0.9529	0.7502	0.9945	0.4223	0.5535	0.3476	0.3044	0.2764	0.6036	0.527
imidazole propionate	0.606	0.9237	0.816	1.3055	2.2441	0.1355	0.1355	0.1355	0.1355	0.1355	1.1842	1.0532	0.7221	1.4541	0.9539	0.944	0.6631	1.828	2.0708	1.4837	1.8554	1.9683	2.0916	1.4382	0.3919	0.3257	0.6145	0.2592	0.3193	1.0461	0.3277
inosine	0.721	0.9155	0.7077	1.0014	0.7173	0.797	0.7732	0.6192	0.6021	0.6782	0.7237	0.6695	0.7042	0.7921	0.6565	0.838	0.8894	1.3081	1.162	1.54	1.4081	1.4416	1.5447	1.2028	1.2528	0.7864	1.0088	1.2112	0.8385	1.3406	1.2702
isobutyrylcarnitine (C4)	1.3529	1.6669	1.1169	0.9145	1.711	2.5269	3.1782	2.3032	2.0683	2.5974	1.5002	1.5535	1.3918	1.0136	0.9759	1.3848	1.0165	1	0.8078	1.1776	0.7912	0.9655	1.1765	0.8771	0.4193	0.4124	0.6161	0.4124	0.4743	0.4312	0.5395
isocitric lactone	0.5024	0.675	0.5024	0.8131	0.5871	0.7704	1	0.5437	0.5275	0.8707	1.3438	1.1672	0.7595	0.6539	1.1511	1.4315	1.1558	1.2422	1.085	0.9435	0.5024	0.8306	0.8137	0.7871	1.0444	1.1316	1.1516	1.1968	0.7831	1.2509	1.1208
isoleucine	0.8312	1.0381	0.9458	1.2278	0.9134	1.014	0.9894	0.8399	0.8056	0.964	0.8118	1	1.035	0.8989	1.1215	1.1987	1.2395	1.3821	1.3163	1.5861	1.4092	1.6203	1.3393	1.1792	0.9769	0.9611	0.9091	0.756	0.7443	0.9431	1.0559
isovalerylcarnitine (C5)	0.584	0.7608	0.5608	0.4093	0.3552	1.7571	2.1145	1.487	1.2379	1.5845	1.8772	1.6268	1.3239	1.4151	1.1808	1.4211	1.4149	1.1414	0.9357	1.4179	1.4153	0.995	1.3405	0.889	0.4912	0.4477	0.5635	0.3994	0.5127	0.3532	0.4222
kynurenine	0.6104	0.9977	0.7015	1.145	0.2158	0.3604	0.5367	0.445	0.2066	0.4144	1.9492	2.2681	2.9342	2.404	2.441	2.5804	2.2354	0.4623	0.4669	0.5489	0.5685	0.5612	0.5623	0.3633	0.9956	0.897	1.4802	0.6504	0.9537	1.1505	1.3818
lactate	0.5662	0.6828	0.5128	0.7382	0.5408	0.6166	0.6133	0.4661	0.452	0.6024	0.84	0.8304	0.9433	0.7779	1.0483	0.9324	0.9871	1.2622	1.22	1.3511	1.1807	1.4653	1.0739	0.9248	1.0973	1.1962	1.0228	1.0129	0.8929	1.1536	1.2495
lanthionine	0.4889	0.6261	0.1662	0.1662	0.9955	0.9014	1.5974	1.0111	1.1825	1.5969	0.9872	1.6686	1.9633	0.3135	1.2947	0.9105	1.3055	1.447	1.1541	2.1071	0.1662	0.8688	0.8025	1.3617	1.2007	0.699	0.599	0.1662	0.3664	1.1998	0.8231
leucine	0.9253	1.1166	0.9789	1.3322	0.8353	0.9634	0.9717	0.8086	0.7545	0.9581	0.7838	0.9427	0.9809	0.8847	1.0512	1.1306	1.1406	1.3469	1.2492	1.5003	1.4213	1.6408	1.3798	1.1272	1.0408	0.9707	0.9514	0.8005	0.7858	0.9544	1.1236
linoleoylcarnitine (C18:2)	0.0832	0.071	0.071	0.1221	0.071	0.6734	0.8625	0.5552	0.5787	0.6415	1.1175	1.1263	1.2951	1.1394	1.2637	1.5658	1.0828	1.0784	0.8625	1.2642	0.9853	1.0701	1.0244	0.7069	0.7397	0.7845	0.8989	0.6908	0.8916	0.6477	0.7775
lysine	0.9092	1.1084	0.8187	1.2696	0.981	0.9076	0.8997	0.8009	0.7579	0.8961	0.9943	1.1747	1.2169	1.0931	1.1591	1.263	1.2374	1.3256	1.1858	1.4653	1.4181	1.5655	1.2714	1.1895	0.943	0.925	0.8244	0.7284	0.7453	0.956	0.9951
malate	0.8507	1.0064	0.8045	1.0171	0.8501	0.9286	0.9647	0.8389	0.8247	1.0171	1.0243	1.1663	1.133	1.0355	1.1281	1.2102	1.1572	1.1906	1.1755	1.1696	1.2474	1.2567	1.1855	1.0491	0.9017	0.8769	0.8343	0.8808	0.7229	0.9363	0.9759
malonate	1.2361	1.3252	1.1955	1.7199	0.9403	1.1485	1.2334	1.1455	1.3382	1.0132	0.8867	1.3195	1.171	0.9846	1.189	1.1404	1.2232	0.9893	1.1027	1.0713	0.9048	1.118	0.8719	1.1055	0.6772	0.9356	0.7417	0.8405	0.848	0.945	0.7952
malonylcarnitine	0.3341	0.5466	0.4338	0.5497	0.2805	0.6678	0.6516	0.5626	0.5485	0.588	0.9628	1.1031	1.1159	1.2877	1.0726	1.1017	1.0663	1.2453	1.4103	1.8551	1.503	2.0367	1.6939	1.2175	0.7413	0.7072	0.7799	0.6615	0.7655	0.6301	0.7341
maltose	8.9288	13.9453	8.1442	11.2623	10.4006	2.033	1.7926	1.7457	1.5313	1.9932	0.5362	1.1145	0.8127	0.8495	1.1334	1.4875	1.3194	0.9454	0.7905	1.1969	1.1227	1.0296	1.0543	0.9888	0.6175	0.6969	0.6587	0.4629	0.5791	0.7787	0.7153
maltotetraose	29.5147	41.3506	28.5029	37.8546	37.9886	4.8147	3.8621	4.3328	5.3298	4.5738	0.6309	1.1156	0.5082	0.1147	1.1718	1.729	1.6778	0.3853	0.4838	0.1147	0.7288	0.9823	0.3992	0.8415	0.2755	0.2619	0.1147	0.1147	0.1205	0.1147	0.4527
maltotriose	13.9636	18.8979	12.9899	18.3205	18.8995	3.2117	2.3493	2.5989	3.1029	2.6248	0.7327	1.1751	0.8374	1.0959	1.1296	1.6724	1.4823	0.6247	0.515	1.5239	1.0113	0.8913	0.9352	0.9147	0.4848	0.4812	0.5588	0.3208	0.3986	0.5441	0.3831
mannitol/sorbitol	0.7784	0.9015	0.5988	1.0104	0.5218	0.6604	0.5974	0.4328	0.4828	0.6547	0.7418	0.9628	0.728	0.7411	0.8622	0.8257	0.7992	1.3183	1.1537	1.3057	1.3302	1.4856	1.0855	0.8466	1.4337	1.0157	1.0331	1.162	1.0364	1.2369	1.2498
mannose	0.3368	0.332	0.4081	0.4248	0.332	0.6632	0.5261	0.6127	0.6809	0.5842	0.8562	1.3566	1.5424	1.1312	2.1289	1.671	1.9298	1.553	1.4108	2.2286	1.7016	1.7561	1.4092	1.2156	0.7648	0.9381	0.654	0.5307	0.5276	0.8871	0.9875
mannose-6-phosphate	0.1492	0.2217	0.1675	0.1294	0.2402	0.2285	0.291	0.2787	0.2981	0.1949	0.8626	1.3068	1.2913	0.7008	1.559	1.4609	1.8314	1.6121	1.1541	2.3839	1.4383	1.6299	1.3345	1.1888	0.9969	1.1873	0.5082	0.4086	0.537	1.0448	0.8452
methionine	0.5414	0.7341	0.5584	0.7432	0.6219	0.7219	0.711	0.6416	0.6596	0.6949	0.8213	0.8609	0.9176	0.8823	1.0089	1.0759	1.0956	1.2858	1.1717	1.562	1.4264	1.601	1.4181	1.1651	1.0285	0.9713	0.889	0.8021	0.7834	1.0507	1.2059
methionine sulfoxide	0.7462	1.0259	0.6761	0.9153	0.7611	0.7611	0.8892	0.7847	0.696	0.7878	0.4067	1.2602	1.1107	1.1694	1.2	1.4801	1.4395	1.3083	1.2437	1.3807	1.353	1.3241	1.2264	1.0281	0.9342	0.7688	0.8136	0.7553	0.6591	0.8711	0.7652
methyl glucopyranoside (alpha + beta)	1.4923	1.6003	1.4044	1.4783	1.6652	0.7529	0.5606	0.6603	0.6877	0.6247	0.2285	0.2909	0.6003	0.605	0.7847	0.7212	0.6183	1.6074	1.6607	1.408	1.7702	1.3533	2.4003	1.7372	1.0609	0.6686	0.7695	1.1111	1.0238	0.9762	1.2561
methylmalonate (MMA)	1.3819	1.6175	1.4006	2.0713	1.3833	0.9989	0.9797	0.8647	0.7178	0.8982	0.8536	0.9837	1.049	0.8801	1.2698	1.1048	1.0275	1.2515	1.1625	1.3384	1.0866	1.2137	1.0078	1.1333	0.7059	1.0183	0.8335	0.8651	0.7675	0.8551	0.9811
methylphosphate	0.3811	0.4752	0.3227	0.54	0.3648	0.3927	0.4956	0.3591	0.2419	0.4372	0.5481	0.7588	0.7467	0.6591	1.086	0.9434	0.9787	1.2901	1.1539	1.6102	1.3186	1.5286	1.1221	0.9917	1.1687	1.5953	1.0885	0.9928	1.1987	1.4167	2.0388
methylsuccinate	0.5242	0.6253	0.4242	0.8551	0.3513	0.8378	1.0129	0.7786	0.6142	0.9389	0.9871	1.1751	1.2239	1.053	1.2036	1.2819	1.1115	3.199	2.2335	2.7734	2.0454	2.8007	2.2286	1.552	1.0866	0.6019	0.6396	0.755	0.7173	0.8789	0.7077
myo-inositol	0.3582	0.465	0.3475	0.5199	0.3554	0.427	0.3958	0.4181	0.3428	0.3968	0.5484	0.6453	0.7404	0.5571	0.6517	0.6839	0.6805	1.1668	1.0924	1.4101	1.2547	1.3805	1.1735	1.1112	1.0776	1.1925	1.0497	1.0418	0.9592	1.0961	1.3393
myristoylcarnitine (C14)	0.0498	0.0675	0.0426	0.0696	0.0422	0.2421	0.2648	0.1849	0.2169	0.2359	0.8367	1.0744	1.2059	0.9431	1.0124	1.2352	0.9272	1.3378	1.3335	1.8299	1.2128	1.4556	1.2004	0.8349	0.9141	0.8672	0.9163	0.9578	0.7963	0.7654	0.9842
N-acetyl-1-methylhistidine	1.7943	1.6003	0.3795	0.672	0.862	0.3643	0.2581	0.2467	0.2563	0.4033	1.0871	1.9261	1.8004	1.6968	1.4662	1.883	2.3493	0.2461	0.2783	1.0531	1.1122	1.3113	0.5727	0.6463	1.1151	0.4591	0.2266	0.3562	0.2215	0.7233	0.4383
N-acetyl-aspartyl-glutamate (NAAG)	0.898	0.9257	0.7942	1.0163	0.9136	1.1977	1.1632	1.047	1.078	1.1684	1.0915	1.2748	1.1663	1.1299	1.3663	1.2553	1.3535	1.0675	0.9351	1.0503	1.0049	0.9951	0.9894	0.9121	0.7646	0.7767	0.7291	0.6963	0.7313	0.8029	0.9067
N-acetyl-glucosamine 1-phosphate	2.1921	2.4804	2.2669	2.5934	2.0069	1.5598	1.3841	1.1157	1.1812	1.3131	0.4871	0.8543	0.9552	0.7017	1.1658	0.9765	1.1186	0.993	1.1075	1.2614	1.1974	1.4966	1.391	0.7529	0.6484	0.9373	0.6573	0.7052	0.6426	0.7343	1.077
N-acetylalanine	0.405	0.5326	0.3778	0.5358	0.4134	0.4717	0.4961	0.3683	0.374	0.4687	0.6432	0.8026	1.0016	0.7511	0.9491	0.9011	1.0494	1.4726	1.3532	1.5617	1.3752	1.8483	1.1404	1.1646	1.4386	1.0828	1.0251	0.787	0.7934	1.153	1.3543
N-acetylarginine	0.104	0.1478	0.1189	0.1802	0.1126	0.2266	0.2305	0.2295	0.1909	0.2234	0.6711	0.7992	0.9954	0.8379	0.8107	0.9026	1.0046	1.6797	1.4909	2.2848	1.5709	1.9968	1.9077	1.5076	1.0816	1.1766	0.8891	0.8745	0.889	1.5061	1.3588
N-acetylasparagine	0.8813	0.8974	0.5999	0.8784	0.6486	0.574	0.5609	0.4642	0.6307	0.7887	0.5284	0.9431	1.1019	1.0553	1.1551	1.0787	1.2067	1.0859	1.0398	1.7325	1.4134	1.3658	1.2531	1.4018	1.4415	0.9384	0.6959	0.6811	0.5381	0.9652	0.6901
N-acetylaspartate (NAA)	0.1434	0.164	0.1332	0.1764	0.1198	0.2212	0.2191	0.208	0.1905	0.2122	0.7502	0.8481	0.8603	0.8247	0.8203	0.844	0.8838	1.1718	1.0814	1.2361	1.1777	1.2098	1.1627	1.0817	1.2345	1.0375	1.0856	1.1018	0.9891	1.1783	1.2119
N-acetylglucosamine 6-phosphate	0.435	0.6435	0.4284	0.6763	0.5448	0.8039	0.7239	0.6122	0.659	0.8037	0.5626	0.6145	0.9812	0.7819	1.0031	0.797	0.9969	1.6435	2.0328	2.2366	2.1999	2.3618	2.0634	1.5364	1.2398	1.5273	1.2538	0.8863	0.9866	1.218	1.692
N-acetylglucosamine/N-acetylgalactosamine	0.4601	0.474	0.4454	0.5133	0.5688	0.7795	0.8889	0.664	0.79	0.704	1.1453	1.1818	1.2008	1.0051	1.4904	1.2538	1.3211	1.1708	1.1232	1.2526	1.0631	1.043	1.0689	0.9949	0.8558	0.8504	0.71	0.7085	0.6102	0.8586	0.6661
N-acetylglucosaminylasparagine	0.9829	1.2062	0.9499	1.4968	1.0171	0.8394	0.8756	0.6701	0.6625	0.7213	0.6432	0.7274	0.8873	0.8241	0.8326	0.8652	0.7959	1.0503	1.1951	1.3855	1.318	1.1857	1.1609	1.055	1.074	1.0291	0.9484	0.9124	0.8251	1.1376	1.2193
N-acetylglutamate	0.1378	0.1448	0.1557	0.1196	0.1976	0.2441	0.2394	0.2269	0.2662	0.1811	0.76	0.8335	0.9925	0.887	0.9381	0.8941	1.0075	1.2951	1.2486	1.5204	1.2424	1.3025	1.3703	1.1201	1.1648	1.0203	0.9775	1.0439	0.953	0.9194	1.0303
N-acetylglutamine	0.492	0.51	0.2033	0.3118	0.3596	0.4415	0.221	0.2008	0.3815	0.4774	0.7925	0.936	1.1504	0.958	1.0497	1.0024	1.1781	1.1216	0.9976	2.1863	1.5295	1.8365	1.2083	1.6385	2.4783	1.5917	0.8941	0.8216	0.8506	1.6121	1.1433
N-acetylhistidine	1.7436	2.0455	0.8718	1.5671	1.1013	0.7006	0.3693	0.4477	0.8145	0.9743	0.9485	1.3182	1.658	1.8126	1.6319	1.4458	1.6909	0.4222	0.271	1.0586	0.714	0.8986	0.9903	1.0531	0.5415	0.4502	0.3019	0.271	0.271	0.271	0.6012
N-acetylmethionine	0.2954	0.3257	0.2427	0.3281	0.2817	0.4084	0.3626	0.3193	0.3434	0.3266	0.9938	0.8694	0.7832	0.7165	0.8051	0.8711	0.8761	1.2143	0.979	1.2881	1.2244	1.3003	1.2331	1.2186	1.2852	1.1564	1.23	1.1404	0.9719	1.2736	1.3626
N-acetylmethionine sulfoxide	0.3818	0.5096	0.2688	0.4702	0.4448	0.5198	0.5769	0.5047	0.4941	0.4178	0.4931	1.1685	1.1653	1.239	1.2184	1.2577	1.0172	0.9834	0.9051	1.1389	1.1528	0.9279	1.2649	0.9418	0.8583	1.007	1.2606	1.0635	0.8564	0.902	0.993
N-acetylneuraminate	0.2392	0.2999	0.2131	0.2573	0.2152	0.498	0.4187	0.3941	0.3785	0.4484	1.0022	1.1562	1.0871	1.0739	1.2363	1.2325	1.1693	1.3251	1.3469	1.4031	1.4127	1.4605	1.324	1.1575	0.9302	0.9029	0.8804	0.8655	0.8123	0.8618	1.0541
N-acetylphenylalanine	1.543	1.0934	0.5365	0.5927	0.8803	0.8503	0.55	0.3922	0.7456	0.8381	0.9974	1.335	1.2895	1.2258	1.1788	1.5086	1.6727	0.8149	0.6574	1.5403	1.1484	1.3126	0.9294	1	1.1126	0.6279	0.4772	0.3347	0.2882	0.1723	0.5195
N-acetylputrescine	5.5213	7.2721	5.4018	8.2326	7.2551	4.9999	4.4421	3.4601	3.6689	4.9665	1.1866	1.1308	1.3883	1.2475	0.9971	1.3202	1.2667	0.867	0.994	1.1748	0.8952	1.0292	0.9316	0.855	0.4516	0.3811	0.304	0.3439	0.2464	0.3697	0.321
N-acetylserine	0.9665	1.0871	0.9255	0.9803	1.0045	0.9062	0.7702	0.7442	0.8464	0.8432	0.7026	1.0545	1.1994	0.9955	1.1338	1.017	1.2534	1.2556	1.1651	1.4043	1.288	1.181	1.3179	1.0921	0.9415	0.8155	0.8757	0.8424	0.7849	0.8518	0.843
N-acetyltaurine	5.4339	5.271	4.956	7.5819	5.4074	2.83	3.3723	2.9022	2.9248	3.3341	1.0052	1.2228	1.2936	1.4926	1.1675	1.6252	1.4152	0.9314	0.7601	1.0189	0.8728	0.8544	1.0034	0.8138	0.4695	0.2813	0.3712	0.2882	0.2313	0.4282	0.334
N-acetylthreonine	1.0436	1.1779	0.8898	1.2482	1.0682	0.9509	0.8713	0.873	0.8811	1.0422	0.7371	1.0229	1.1552	1.1438	1.0027	1.1027	1.1213	1.0886	0.8883	1.6568	1.0062	1.2895	1.2283	0.9529	1.12	0.6145	0.7429	0.5366	0.5651	0.9617	0.902
N-acetyltyrosine	1.1032	0.7587	0.2654	0.3885	0.6725	1.0736	0.4897	0.5745	1.0881	1.4271	0.9746	1.1266	1.116	1.0005	1.1764	1.8352	1.8561	0.4969	0.275	1.0168	1.119	1.0981	0.5515	0.9431	1.0887	0.5227	0.3232	0.3479	0.3249	0.9291	0.3547
N-arachidonoyltaurine	0.1596	0.1807	0.1549	0.3984	0.1549	0.1549	0.2061	0.1549	0.3477	0.188	0.6088	0.9021	1.1412	0.8344	1.2668	2.0717	0.9015	1.6188	0.9573	2.6624	2.9364	2.9103	1.2635	1.0709	1.7984	1.534	0.8132	0.2441	0.4113	0.7707	0.4793
N-delta-acetylornithine	0.6714	1.1826	0.9597	1.2694	1.0945	0.0604	0.1103	0.0565	0.0814	0.058	0.1556	0.2359	0.3135	0.2422	0.2856	0.2309	0.208	1.1308	1.3807	1.6352	2.0554	1.4077	2.4119	1.0109	0.6933	0.9451	1.1792	1.2061	0.7837	1.1636	1.7122
N-formylmethionine	0.999	1.0427	0.7881	1.1372	0.7355	0.7897	0.7321	0.8391	0.6476	0.7618	0.7732	0.9628	1.0465	1.0922	0.9459	0.9791	1.2807	1.5102	1.4176	1.8522	1.6454	1.79	1.7512	1.3635	0.9059	0.6977	0.9713	0.8569	0.823	0.8936	1.0185
N-formylphenylalanine	2.1096	2.5705	2.3668	2.7047	1.2886	1.3294	1.5486	1.4092	0.8181	1.3821	0.488	0.8532	1.2065	0.7589	0.9433	1.2439	1.1888	1.3729	0.9095	1.3305	0.89	1.0937	1.2406	0.8534	0.6278	0.488	0.6697	0.8598	0.5849	0.488	0.6676
N-methylalanine	2.3342	3.8239	2.5913	2.4658	1.6047	1.0629	2.0707	1.394	1.5514	1.6637	0.3393	1.6656	0.9238	0.4516	0.6678	1.8037	1.5292	0.4253	0.1129	0.9312	0.6429	0.6996	1.1496	0.463	1.4194	0.6719	0.7639	1	0.1129	0.9402	0.2717
N-monomethylarginine	0.37	0.5092	0.2564	0.8037	0.5399	0.2969	0.4329	0.1881	0.2706	0.2496	0.4306	0.4724	0.6246	0.5183	0.6897	0.5404	0.6302	1.2357	1.489	1.776	1.4338	1.3043	1.3992	1.1268	1.6327	1.4258	1.0448	1.0032	0.8957	1.3541	1.6941
N-palmitoylserine	0.2678	0.4764	0.2608	0.4262	0.48	0.3135	0.3427	0.2608	0.553	0.2608	0.2608	0.9785	0.2608	0.2608	0.5609	0.2608	0.6102	1.9534	0.2608	0.9455	1.0215	3.1871	0.2608	0.7446	6.8132	3.0108	2.1825	0.9432	1.2782	3.0125	1.6867
N-stearoylserine	0.2004	0.4766	0.3005	0.6133	0.3248	0.6263	0.6154	0.2045	0.4261	0.6869	0.673	1.2052	1.4987	1.7832	1.6201	1.0736	1.7608	2.0751	1.0383	1.1378	1.0129	1.1115	0.9173	0.7316	1.9717	0.6412	0.9871	0.3141	0.508	1.0481	0.4832
N-trimethyl 5-aminovalerate	0.6631	0.7151	0.5679	0.8573	0.4649	1.032	1.249	0.9705	1.0561	1.0703	0.6599	0.7949	0.7789	0.6443	0.8854	0.9948	1.0052	0.7817	0.9229	1.21	1.0893	1.0813	0.8474	0.7525	2.625	2.4717	4.4495	3.3522	2.0416	2.3926	6.08
N1-methyladenosine	0.9303	1.4816	0.9801	1.4712	1.1751	0.9776	0.9743	0.6698	0.8695	1.0099	0.7464	1.0252	1.0454	0.8871	1.1086	1.0509	1.2923	1.0981	1.258	1.5017	1.0717	1.378	1.37	1.1798	0.8246	0.8008	0.8532	0.8043	0.5145	0.8113	1.061
N2,N2-dimethylguanosine	2.7108	3.2968	3.18	4.1927	4.0412	1.4662	1.5782	1.1705	1.406	1.4699	0.8421	1.0808	0.9213	1.0209	0.9581	1.2295	1.3694	0.761	1.0139	1.4347	1.1305	1.2722	1.0232	0.8237	0.5766	0.5715	0.4195	0.5702	0.3836	0.5889	0.5907
N6,N6,N6-trimethyllysine	1.1947	1.8119	1.2367	2.2805	1.2435	1.082	0.9787	0.8823	0.7598	0.9378	0.6291	0.9435	1.0422	0.859	1.0677	1.4683	1.1905	0.925	0.8531	1.2376	1.0535	1.243	1.0213	0.8296	1.1931	0.7124	0.632	0.5427	0.9536	1.309	1.419
N6-carbamoylthreonyladenosine	3.6299	3.8731	3.6566	4.7941	3.2072	1.5508	1.5447	1.1299	1.3288	1.6707	0.8236	0.8681	0.7056	0.9045	0.8161	1.3013	0.8928	0.9343	0.9614	1.2068	1.2234	1.419	1.2603	1.0106	1.0399	0.7551	0.8965	0.8953	0.6066	0.9272	1.0483
N6-succinyladenosine	2.1552	2.1451	1.8468	2.5197	1.9121	1.8989	1.9401	1.5469	1.8148	1.8779	1.0892	0.9388	0.9693	1.2117	1.0546	1.0004	1.0633	1.0047	1.0141	1.205	1.1642	1.391	1.1401	0.7799	0.6616	0.4191	0.7124	0.7415	0.4994	0.8398	0.8662
nicotinamide	0.463	0.5841	0.4947	0.6074	0.5802	0.6141	0.7193	0.5521	0.6386	0.6218	0.8588	0.9292	1.0249	0.8812	0.9995	1.0005	1.1064	1.3055	1.2101	1.3962	1.1628	1.245	1.1534	1.2149	1.1239	1.1017	0.9162	0.8696	0.8342	1.0862	1.0223
nicotinamide adenine dinucleotide (NAD+)	0.9293	0.8523	1.0771	0.8992	1.1155	0.6964	0.498	0.5994	0.5981	0.5497	0.8845	0.7412	0.8268	0.7519	0.9096	0.8536	0.8641	0.9815	1.1272	1.527	1.1921	1.2263	1.1448	1.0205	1.065	0.9435	1.0009	1.0584	0.9991	1.0855	1.2566
nicotinamide riboside	1.9965	1.7606	2.0032	2.0208	2.3729	0.9181	0.3852	0.592	0.4567	0.3852	1.2785	1.4371	0.9795	0.7249	1.5106	1.2628	0.93	1.4975	1.3441	1.3404	1.2814	0.3852	1	1.261	0.9143	1.6168	0.6428	0.8094	0.3852	1.1049	0.7797
O-sulfo-L-tyrosine	0.9265	0.946	0.8628	1.1486	0.9274	0.6276	0.7328	0.5298	0.4702	0.6545	0.8865	0.8702	0.7497	0.8123	0.9407	1.1796	1.0991	1.4302	1.2153	1.6491	1.3644	1.371	1.445	1.0929	1.0625	0.9235	1.0819	0.9482	0.7836	1.1194	1.3671
o-Tyrosine	1.4883	2.3313	1.6877	2.0035	1.4418	1.2741	0.9922	1	1.1687	1.436	0.5018	0.7177	0.8546	0.8654	0.8635	0.7991	1.0155	1.2018	1.3235	1.8057	1.2497	1.3998	1.7964	1	0.5018	0.8802	0.9047	0.6619	0.5018	0.6534	1.2914
oleoyl ethanolamide	0.0344	0.1567	0.0344	0.1505	0.0878	0.1128	0.0935	0.0344	0.059	0.0996	0.2298	0.3048	0.3752	0.2831	0.413	0.4409	0.3835	1.4186	1.278	1.2117	1.0148	1.5485	1.045	0.9852	4.2906	1.1907	1.755	0.475	0.774	1.1186	1.0261
oleoylcarnitine (C18:1)	0.0758	0.0945	0.0641	0.1057	0.0696	0.2097	0.2346	0.1799	0.1743	0.2044	0.5307	0.4743	0.6455	0.4882	0.4309	0.5186	0.4296	1.2243	1.2517	1.3792	1.1233	1.3921	1.1348	0.8646	1.1876	1.1234	1.1537	1.0625	1.1055	1.0053	1.207
ophthalmate	3.6728	4.221	3.5983	4.4921	4.2671	1.0154	1.0215	1.1826	0.9846	1.7305	1.3863	1.2053	1.7855	1.7003	1.8557	1.7737	1.6811	1.0176	0.7002	0.717	0.841	0.8257	0.8842	0.5171	0.3891	0.6199	0.5452	0.6031	0.6166	0.5379	0.765
ornithine	0.8876	1.2562	0.9981	1.4452	0.8057	1.351	1.2105	1.0019	0.9546	1.2528	0.9121	1.0166	0.9902	0.9549	1.0934	1.0896	1.0558	1.3713	1.3847	1.9677	1.4182	1.8054	1.4562	1.1336	0.881	0.8158	0.7238	0.7217	0.6545	0.8527	0.8719
orotate	1.8773	2.329	1.9103	3.1264	1.8249	2.1693	2.2518	1.6247	1.7665	2.168	1.063	0.9722	1.0276	0.9973	0.9907	1.2974	1.0994	1.2706	0.9333	1.069	0.9352	1.0027	1.384	1.1445	0.6125	0.6786	0.6288	0.7515	0.5166	0.7569	0.8583
orotidine	2.8521	3.3997	2.6684	4.2858	2.9395	2.2488	3.0254	2.064	1.9424	2.7194	1.2458	1.6181	1.4139	1.4871	1.5963	1.8472	1.7867	0.9973	0.7774	1.0474	0.884	0.9471	0.8068	0.539	0.3418	0.2119	0.2982	0.306	0.2361	0.416	0.376
oxalate (ethanedioate)	1.2438	1.3846	1.079	1.4774	1.0339	0.9074	1.103	1.0099	0.8437	1.2856	0.372	0.8943	1.1345	0.9961	0.9883	1.0973	1.2676	1.3651	1.3076	1.2607	1.2554	1.328	1.119	1.0887	0.8605	0.7244	0.7614	0.8575	0.676	0.9008	0.7432
palmitoleoylcarnitine (C16:1)	0.0343	0.0501	0.035	0.0532	0.0326	0.1571	0.1722	0.1248	0.1226	0.1534	0.5549	0.629	0.6849	0.5814	0.579	0.7126	0.5321	1.227	1.2277	1.6917	1.05	1.2756	1.3048	0.6801	1.0659	1.1754	1.2494	1.1987	1.0848	0.9582	1.2889
palmitoyl ethanolamide	0.1918	0.3038	0.2201	0.3584	0.248	0.305	0.296	0.1566	0.2502	0.2802	0.2425	0.3845	0.4058	0.3758	0.465	0.4151	0.4089	1.5112	1.2817	1.2342	1.0689	1.6615	0.9888	1.0128	7.1175	1.9608	2.9063	0.7968	1.2312	1.8493	1.7965
palmitoylcarnitine (C16)	0.0989	0.1331	0.1034	0.142	0.1069	0.3919	0.4293	0.2804	0.3196	0.3769	0.6791	0.655	0.8272	0.7219	0.6692	0.7163	0.6563	1.1965	1.2172	1.2931	1.0669	1.3428	1.0136	0.8366	1.3962	1.3375	1.3945	1.3473	1.3046	1.1144	1.449
pantetheine	0.0867	0.19	0.1229	0.1552	0.1924	0.3464	0.2312	0.2419	0.2581	0.1929	1.2262	0.9723	0.9923	0.6602	1.2289	1.1135	1.2362	1.4542	1.318	1.8183	1.3584	1.8895	1.1635	0.9952	1.0077	1.2194	0.8641	0.6621	0.7443	1.0048	1.6236
pantothenate	2.4734	2.9989	2.6078	3.2353	2.92	1.5414	1.698	1.4301	1.3687	1.7132	0.9357	1.2407	1.318	1.0052	1.4026	1.5124	1.3844	0.9629	0.82	0.959	0.9948	1.1545	0.8976	0.7802	0.887	0.8963	0.8398	0.7396	0.77	0.9119	1.1328
phenylalanine	0.9409	1.0944	0.9133	1.1371	0.8028	0.829	0.8394	0.6864	0.6904	0.7361	0.8856	0.9479	1.1057	0.9225	0.9825	1.0846	1.1831	1.3223	1.1691	1.4123	1.2889	1.5649	1.3093	1.1444	1.0904	0.9967	0.9739	0.7845	0.8431	1.0147	1.2155
phosphate	0.7307	0.7854	0.7347	0.7833	0.7779	0.8214	0.7617	0.7783	0.7893	0.7889	0.9337	0.9503	0.9867	0.8898	0.9665	1.0045	0.9999	1.0489	1.0488	1.1796	1.0895	1.0371	1.0733	1.0001	1.02	1.0057	0.9571	0.9598	0.9549	1.0407	1.0788
phosphoenolpyruvate (PEP)	1.919	2.6925	2.533	2.5584	2.8953	1.3432	1.1935	1.6135	1.1681	1.6658	1.0371	1.0958	0.9876	1.0214	1.1322	1.0765	1.0577	0.9643	1.0264	0.9438	1.0986	0.9233	1.1972	1.0911	0.8612	0.9359	0.9498	0.8932	0.8859	0.9622	0.8404
phosphoethanolamine	1.2465	1.5643	1.2487	1.7066	1.2935	1.5095	1.4924	1.3743	1.2569	1.4924	1.0892	1.3616	1.2278	1.1391	1.3057	1.4185	1.3373	0.9101	0.8063	1.0204	1.0088	0.9912	0.917	0.8567	0.7639	0.6711	0.678	0.723	0.6138	0.746	0.7733
phosphopantetheine	0.0603	0.079	0.0603	0.1299	0.1252	0.2036	0.2073	0.1455	0.1244	0.1436	0.9876	0.7394	0.6154	0.6377	0.8388	0.9016	0.837	1.4681	1.6055	1.8014	1.74	2.0826	1.4631	1.4873	1.1678	1.295	1	1.0443	0.7926	1.4693	1.8357
pimelate (C7-DC)	1.0178	1.2616	0.8355	2.5347	0.7254	0.5012	0.5012	0.7629	0.5012	0.5647	0.5012	0.706	1.0955	0.8144	0.7636	0.8406	0.7843	1.1546	1.1938	1.0937	0.8837	1.4944	0.5152	0.5012	1.2734	1.0243	1.3562	1.533	1.2325	1.1455	1.3265
pipecolate	6.013	10.9715	8.2574	10.6517	11.709	1.3645	2.3275	1.4209	1.684	1.7134	1.038	1.5703	1.4732	1.1933	1.7744	1.8519	2.2366	0.8945	0.8353	1.0667	0.8639	1.1293	0.856	0.6833	0.7832	0.5697	0.63	0.6284	0.6654	0.8403	0.7282
proline	1.2464	1.3835	1.3243	1.6699	1.3406	1.1772	1.2153	0.9216	1.0714	1.1421	0.8812	1.0668	1.1406	0.9318	1.1238	1.0673	1.0583	1.2186	1.0575	1.2661	1.1297	1.2466	1.0091	1.0225	0.8757	0.8268	0.7905	0.6799	0.7341	0.8679	0.9385
prolylalanine	0.6577	0.9138	0.4556	0.9564	0.6176	1.1858	1.1959	0.9879	0.8661	0.9396	1.0357	1.3843	1.1579	1.2238	1.102	1.4344	1.4133	1.1431	1.0435	1.5902	1.3572	1.8137	1.1809	1.1024	0.7317	0.7088	0.6747	0.4892	0.588	0.8184	1.0136
prolylglutamate	0.7113	0.9661	0.7837	1.1137	0.8847	1.0211	0.9998	0.8659	0.889	0.9583	0.7846	0.9662	1.1657	1.0262	1.1832	1.1471	1.422	1.3716	1.3866	1.8824	1.3623	1.7606	1.4029	1.2566	0.8831	0.8185	0.8074	0.6614	0.7587	0.8239	1.0321
prolylglycine	0.4409	0.6645	0.3977	0.8608	0.501	0.9902	1.0379	0.7485	0.6973	1.0667	0.9825	1.4011	1.3541	1.0463	1.105	1.1558	1.7375	1.3066	1.2413	1.7087	1.1543	2.2327	1.3433	1.281	0.704	0.7458	0.5965	0.5646	0.5464	0.758	1.0027
prolylproline	0.7028	1.0455	0.6083	1.0186	0.7982	0.9602	0.8436	0.6607	0.6483	0.679	1.0211	1.3583	1.3119	1.1608	1.6529	1.7422	1.2775	1.2199	1.1554	1.729	1.7288	1.5791	1.3274	0.9814	0.7758	0.9711	0.7094	0.5859	0.4819	0.6794	0.8596
propionylcarnitine (C3)	0.4886	1.0748	0.5409	0.6593	0.4908	0.9934	1.2655	1.1449	1.3828	1.6229	0.71	1.1763	1.1913	0.9766	1.143	0.9684	0.9067	1.1741	1.1121	1.4043	1.4459	1.12	1.3175	0.8707	0.7704	0.9159	0.8496	1.4829	0.5871	0.7167	0.6106
prostaglandin F2alpha	0.3856	0.2978	0.2754	0.3055	0.3208	0.51	0.6299	0.4366	0.4544	0.5209	0.9465	1.0808	1.1161	1.0659	1.2203	1.329	1.0215	1.3272	1.1359	1.5754	1.1949	1.3324	1.4205	1.0588	1.025	0.6262	0.9072	0.9785	0.5895	0.8365	0.7546
pseudouridine	1.8515	2.5376	2.1202	3.0483	2.1941	1.1295	1.425	1.0451	1.1008	1.1129	1.0714	1.1822	1.1896	0.8893	1.0862	1.1537	1.2405	1.0342	0.8575	1.1446	0.978	1.0546	0.9242	0.8416	0.7423	0.5455	0.5653	0.6198	0.4421	0.7454	0.7288
putrescine	6.4937	7.3503	6.4708	8.7784	9.1081	4.866	5.42	4.0096	4.5194	5.0872	1.1679	0.9954	1.2516	1.1539	1.0934	1.2113	1.1299	0.8713	1.0695	1.0514	0.9764	1.1416	0.946	0.9505	0.5871	0.4897	0.3433	0.4669	0.3152	0.4814	0.4905
pyridoxal	0.2814	0.4062	0.2783	0.3839	0.333	0.5595	0.4998	0.4058	0.4565	0.4256	0.8356	0.8857	0.9071	0.7464	1.0186	0.9461	1.0224	1.2918	1.3083	1.6361	1.3679	1.507	1.2531	1.1527	1.096	0.9546	1.004	0.8839	0.8278	0.996	1.5375
pyridoxamine	0.2183	0.5011	0.298	0.3473	0.3101	0.5819	0.4413	0.5135	0.4461	0.5453	0.9863	0.7077	0.8558	0.6442	0.9712	0.892	0.8222	1.2034	1.2004	1.4202	1.2627	1.3343	0.8182	1.0412	1.1046	1.2273	1.1167	1.0578	1.0796	0.9869	1.4295
pyridoxamine phosphate	0.0633	0.0603	0.0587	0.1132	0.0834	0.1662	0.1523	0.0587	0.1164	0.1006	0.6093	0.5761	0.5274	0.414	0.598	0.5389	0.6407	1.2011	1.2766	1.4311	1.1076	1.2098	0.988	1.1438	1.3183	1.2533	1.1069	0.9464	1	1.3735	1.3151
pyroglutamine	0.0444	0.0425	0.0378	0.0497	0.0376	0.0766	0.0611	0.0589	0.0643	0.0616	0.437	0.3874	0.3949	0.4048	0.3837	0.3955	0.4163	1.0873	1.0648	1.1338	1.0283	1.1646	1.0701	0.9992	1.1552	1.0613	1.0197	0.9756	1.0008	1.0569	1.2196
pyruvate	0.2322	0.2437	0.2139	0.3662	0.2045	0.3069	0.3194	0.235	0.2616	0.3165	0.755	1.0946	1.2042	1.064	1.3776	1.2551	1.2931	1.5111	1.2537	1.5139	1.5347	1.7046	1.4138	1.1964	0.8586	0.8777	0.8217	0.8604	0.73	0.9528	0.8953
ribitol	0.9523	1.073	0.8959	1.423	0.8565	1.002	0.9428	0.7785	0.4692	0.9089	0.6326	0.7709	0.9255	0.9564	1.0712	1.0278	1.2491	1.5951	1.4227	1.311	1.296	1.5737	1.4985	1.0886	4.0082	0.7467	0.767	0.9354	0.5174	3.7693	0.9116
riboflavin (Vitamin B2)	0.8746	0.9109	0.8518	0.9254	0.8153	0.958	0.87	0.8251	0.7685	0.9126	0.7383	0.7804	0.8461	0.9256	0.7912	0.9784	0.8356	1.276	1.2768	1.786	1.2662	1.7189	1.3966	0.965	1.3703	1.0216	1.2662	1.085	0.9023	1.3049	1.1133
ribonate	1.3611	1.8609	1.5246	2.5642	1.4823	0.7349	0.9035	0.7358	0.6476	0.8762	0.6902	0.792	0.9233	0.7849	1.0062	0.9938	1.1763	1.5167	1.1532	1.529	1.3389	1.4212	1.2556	1.1494	1.4166	0.9192	0.7557	0.7625	0.562	1.38	0.9552
ribose	0.9238	1.3328	0.9051	1.4414	1.0378	1.296	1.2222	0.9163	0.9265	1.0546	0.771	0.7869	1.0463	0.8962	1.0076	0.998	1.1124	1.6728	1.6128	1.6939	1.7138	1.6078	1.772	1.3601	0.8662	0.7705	0.8269	0.989	0.7818	1.002	0.9642
ribose 1-phosphate	1.4774	1.2605	1.1622	1.6245	1.4085	1.1045	1.3508	0.8144	1.0091	1.0133	0.3763	0.2785	0.2338	0.2157	0.2127	0.2363	0.3886	1.3287	0.8597	1.0926	1.1816	0.7974	1.2764	0.9909	1.1402	0.8138	0.8608	1.5319	0.989	1.5654	0.9185
ribulonate/xylulonate	0.836	1.005	0.7459	1.3457	0.7111	0.7431	0.9507	0.7512	0.7104	0.8632	0.8514	0.8515	1.1783	0.9244	1.3423	1.2008	1.4717	1.6019	1.3487	1.669	1.4269	1.7863	1.4469	1.155	0.7842	0.8436	0.7385	0.726	0.608	0.9333	0.9805
ribulose 5-phosphate	0.1206	0.3099	0.1206	0.1801	0.176	0.3968	0.21	0.3458	0.3219	0.4109	0.5577	0.8984	1.8705	1.3422	2.1069	0.9757	2.0412	0.8589	1.0202	1.8136	1.5456	1.9254	1.9059	1.0071	0.5717	1.7669	0.9812	0.6143	0.9047	0.4519	1.3571
S-adenosylhomocysteine (SAH)	0.8517	0.8727	0.7803	0.9978	0.8434	1.1235	1.1355	0.8557	0.8901	0.9181	1.2083	1.1139	0.8858	0.9882	1.2183	1.1972	1.0022	0.9205	0.7704	1.0083	0.9265	1.2866	0.9446	0.9023	1.1216	0.9158	1.1614	1.2052	0.9098	1.1428	1.3797
S-adenosylmethionine (SAM)	0.9339	1.2746	1.011	1.4657	1.3041	1.0208	1.0735	0.9067	0.8604	0.9827	1.0627	1.229	1.1858	1.0248	1.2282	1.2691	1.3631	1.1161	0.9313	1.4453	1.0049	1.1763	1.0868	0.9274	0.6458	0.6748	0.5898	0.5609	0.5498	0.7206	0.867
S-methylcysteine	1.3981	2.0016	1.4379	2.1582	1.5345	0.8243	0.7719	0.7096	0.7631	0.9088	1.4086	0.9411	1.2185	1.0637	1.1626	1.3565	1.4064	0.5473	0.4637	0.557	0.5815	0.6064	0.5152	0.4743	0.8972	1.029	1.0078	0.7998	0.7206	1.2088	1.4983
S-methylglutathione	1.821	2.0678	1.905	2.6003	2.2597	1.211	1.1924	0.5773	0.968	0.9528	0.7767	0.5868	0.8554	1	0.881	0.7292	0.9425	0.9903	1.022	1.7005	1.2696	1.1023	1.1172	1.0571	0.8377	1.0245	0.4209	0.4209	0.6084	0.8335	1.1018
sedoheptulose	0.4005	0.4246	0.4005	0.6857	0.4005	0.6398	0.5675	0.6151	0.6753	0.4755	0.9848	1.3678	1.8803	1.1056	2.0902	1.6223	1.5516	1.2201	1.4382	2.1017	1.7501	1.8057	1.3864	1.2476	0.7196	0.9414	0.5534	0.4005	0.4481	0.7264	0.907
sedoheptulose-7-phosphate	0.1128	0.1404	0.1215	0.0723	0.1355	0.1798	0.1328	0.2578	0.1979	0.1506	0.8558	1.1187	1.0305	1.06	1.2074	1.0951	1.1696	1.0052	0.8462	1.5222	1.0874	1.2346	0.9271	1.0283	0.9948	1.2156	0.8206	0.5265	0.8123	0.895	1.1771
serine	1.0428	1.3633	1.0632	1.4242	0.9686	0.8455	0.8311	0.6665	0.6772	0.8666	0.8785	1.0038	1.0143	0.9982	0.9916	1.0945	1.1139	1.1318	1.0667	1.2639	1.1744	1.3075	1.1178	0.9982	1.0873	0.8818	0.9131	0.8433	0.7898	0.9686	1.053
serylglutamate	0.6484	1.0156	0.6529	1.157	0.9402	1.0505	1.0557	0.6567	0.7506	0.844	0.9137	1.1988	1.0964	0.8967	1.0471	1.2289	1.1686	1.069	1.0702	1.235	1.1418	1.3782	0.9839	1.1118	0.8216	0.844	0.4221	0.5394	0.6229	0.9797	1.1478
serylglycine	0.479	0.5812	0.4238	0.6463	0.5091	0.715	0.5845	0.5131	0.4999	0.5386	0.9983	1.2317	1.0828	0.9948	1.162	1.3249	1.1492	1.1699	1.1024	1.1792	1.1968	1.2869	0.9801	1.0357	1.1325	1.0599	0.9014	0.6828	0.7301	1.0637	1.198
spermidine	1.0294	1.4582	0.997	1.6902	1.2926	1.3381	1.5271	1.0203	1.1571	1.3529	0.7406	0.897	1.1027	0.7375	1.0988	1.1577	1.2468	1.2536	1.1	1.5754	1.2325	1.5088	1.2308	1.003	0.4337	0.3812	0.3426	0.4032	0.3291	0.5935	0.7861
spermine	0.3782	0.5311	0.3522	0.756	0.3629	0.6385	0.6438	0.7272	0.4347	0.9652	0.6462	1.1463	1.7408	1.1193	0.8756	1.3468	1.0096	2.2092	1.1994	1.4152	1.6963	1.6895	2.2614	0.8181	0.6701	0.4948	0.7624	0.9106	0.6074	0.8691	1.0913
sphingadienine	0.0728	0.113	0.0547	0.1039	0.1078	0.2847	0.3046	0.2277	0.2321	0.2264	0.9302	0.8732	0.7801	0.6993	0.664	0.7948	0.843	1.207	1.2111	1.264	1.4326	1.3995	1.1901	1.1115	1.2942	1.1766	1.0007	0.9993	0.9846	1.1939	1.2029
sphinganine	0.1881	0.2186	0.1478	0.1832	0.1763	0.3349	0.384	0.2989	0.2945	0.2968	0.7886	0.8075	0.7895	0.7515	0.7803	0.8768	0.8302	1.831	1.853	2.0253	2.0453	2.4655	1.8366	1.6465	1.2725	1.0944	1.0734	0.9565	0.8966	1.1264	1.3807
sphingosine	0.0805	0.1297	0.0884	0.1275	0.0888	0.1361	0.1368	0.1108	0.1153	0.1318	0.4595	0.4666	0.4882	0.3955	0.4467	0.4873	0.5073	1.0837	1.0404	1.1176	1.1825	1.2667	1.0335	0.8822	1.4093	1.2877	1.1656	1.1515	1.0484	1.2322	1.4174
stachydrine	2.1496	3.7095	2.666	4.0705	2.2588	0.2959	0.4317	0.1727	0.2474	0.2737	0.3975	0.533	0.4511	0.4982	0.5919	0.6686	0.7923	2.0139	1.9988	2.878	2.5503	2.8094	2.5847	1.7161	1.0103	0.9563	0.9027	0.9897	0.8397	1.0255	1.5774
stearoyl ethanolamide	0.1913	0.3302	0.2415	0.3189	0.2994	0.3266	0.2762	0.2469	0.2426	0.3313	0.3882	0.325	0.4232	0.2923	0.4305	0.4126	0.3758	1.4267	1.2963	1.4305	1.2605	1.5192	1.1135	0.9059	1.9096	1.1836	1.099	0.9844	1.0156	1.153	1.4058
stearoylcarnitine (C18)	0.1509	0.1991	0.1402	0.1999	0.1487	0.4203	0.4967	0.3101	0.3308	0.3623	0.8566	0.7177	0.8989	0.6711	0.728	0.7808	0.6415	1.6553	1.3891	1.4355	1.2108	1.6223	1.0261	0.9157	1.3093	1.0449	1.0451	1.0743	1.0623	0.9739	1.0929
succinylcarnitine (C4-DC)	0.7154	0.8534	0.7479	0.9996	0.7868	1.1285	1.2082	1.0786	1.07	1.216	0.7934	1.2004	1.0879	1.0129	1.3052	1.1319	1.4154	1.0232	0.9203	1.5428	1.1597	1.053	1.1502	0.9466	0.6627	0.5246	0.5161	0.494	0.6392	0.6825	0.7215
tartronate (hydroxymalonate)	1.066	1.2933	1.2284	1.2526	1.0826	1.1037	0.9664	0.8501	1.0306	1.1049	0.5787	0.6713	0.9948	0.7287	1.0982	0.7011	0.8619	0.9871	1.0056	1.5588	1.0052	1.5946	1.363	1.0455	0.6801	0.919	0.7394	0.7078	0.8215	0.7505	1.2367
taurine	1.1695	1.2887	1.1368	1.3883	1.1404	1.1248	1.0864	0.9739	0.953	1.1211	0.9691	1.0071	1.0026	1.0093	1.066	1.1015	1.1195	1.0163	0.9965	1.0785	1.1031	1.1504	1.0419	0.9612	0.7791	0.7434	0.7397	0.7265	0.7035	0.83	0.8468
thiamin (Vitamin B1)	0.3478	0.611	0.2844	0.701	0.3522	0.3482	0.4253	0.2658	0.3396	0.5051	0.8844	0.683	0.654	0.6848	1.0905	1.1687	1.0845	1.7564	1.2725	2.0767	1.7826	2.165	1.4889	1.2999	1.0139	0.8661	1.065	0.6797	0.6438	1.0976	1.4372
thiamin monophosphate	0.25	0.3169	0.2708	0.4902	0.2877	0.2914	0.3734	0.2421	0.2782	0.3321	0.7031	0.9371	1.0585	0.9814	0.8872	0.8971	1.0681	1.4127	1.276	1.5357	1.5098	1.6786	1.5474	1.3449	1.0082	1.0394	1.0383	0.9422	0.9739	1.2455	1.2796
threonate	0.7989	1.1408	0.7343	1.4534	0.811	0.9689	1.2462	0.937	0.7713	1.0424	0.4743	1.5706	1.4507	1.5411	1.3952	1.8436	1.5449	1.2532	1.1849	1.0026	1.2073	1.0878	0.9751	1.0062	0.5668	0.4344	0.5588	0.6344	0.4629	0.5598	0.4014
threonine	0.983	1.2697	0.9316	1.4539	0.8385	0.9977	1.0459	0.8141	0.7995	1.0377	0.8799	0.967	0.9961	0.9781	0.9109	1.0852	1.1084	1.183	1.1253	1.2603	1.2938	1.3803	1.1389	0.9988	1.1009	0.9264	0.8257	0.7866	0.7953	1.1787	1.2062
thymidine	1.107	1.5749	1.0523	1.6006	0.9588	1.1464	1.3569	0.9939	1.1564	1.1995	1.1108	1.1669	1.1399	1.0796	1.1021	1.1884	1.3453	0.808	0.841	1.1409	0.963	1.0608	1.0917	0.7781	0.4955	0.4387	0.4598	0.5306	0.4079	0.5387	0.5202
trans-4-hydroxyproline	3.7204	3.6903	3.5154	3.8704	3.873	3.0871	3.3879	3.2942	3.5224	3.2733	2.1409	2.191	2.2927	1.9102	2.4954	2.3032	2.5548	0.9726	0.8936	0.9863	0.9351	1.0664	0.892	0.8311	0.8177	0.7028	0.7452	0.537	0.6845	0.8015	0.7903
trigonelline (N'-methylnicotinate)	1.1126	2.0721	1.0544	1.9877	1.7247	0.4328	0.5438	0.3849	0.3964	0.432	0.3556	0.3691	0.3933	0.3412	0.4761	0.5731	0.6036	2.2973	1.793	3.0698	2.6671	2.7503	2.5925	1.8809	1.1168	0.9287	0.936	0.8566	0.775	1.134	1.2639
trimethylamine N-oxide	0.9254	1.4421	0.911	1.1106	0.19	0.7503	0.19	1.0523	0.8115	1.0023	0.8813	0.6636	0.19	0.9161	0.9702	0.19	0.6341	1.4166	1.2723	1.6744	1.8423	1.9274	1.6281	1.3831	1.0666	0.8319	0.19	0.8483	0.9474	1.1368	1.3991
tryptophan	1.3613	1.8475	1.6999	2.4283	0.9379	0.93	0.958	0.7567	0.7872	0.9124	0.8817	1.0015	1.1412	0.9217	1.042	1.0833	1.1411	1.1997	1.1203	1.2984	1.1568	1.3568	1.1422	1.0403	0.9728	0.9537	0.8417	0.7169	0.8052	0.967	1.0982
tyrosine	0.809	1.0258	0.8266	1.1211	0.9998	1.0046	1.1134	0.8555	1.017	0.9025	0.8144	1.0002	1.0992	0.8761	1.1574	1.1639	1.1664	1.0514	0.9937	1.4275	1.3477	1.121	1.3999	1.0806	0.7988	0.981	0.8947	0.8159	0.6876	0.9743	1.2816
UDP-galactose	3.5049	4.1255	3.1575	4.4645	3.7123	3.5218	3.838	2.9049	3.0448	3.518	1.6068	1.4689	1.4201	1.4299	0.8168	1.5896	1.3942	0.8356	0.7421	0.3527	0.8418	0.6317	1	0.6747	0.4356	0.2832	0.4324	0.7809	0.6804	0.4336	0.5906
UDP-glucose	8.7904	10.1545	9.2261	11.525	9.7375	9.2293	7.8579	6.7969	6.8054	8.156	0.9926	1.2792	1.0221	1.2906	0.7041	1.4406	1.3694	0.8306	0.8816	0.5458	0.7665	0.9129	1.3018	0.664	0.6447	0.4045	0.8153	0.9008	1.3113	0.8544	1.492
UDP-glucuronate	5.982	6.4953	5.4897	8.0684	6.3637	4.2466	4.7851	3.2783	4.9177	4.065	2.6926	2.0827	2.0127	2.3608	1.6576	2.9344	3.2821	0.6394	0.5178	0.9468	0.7104	0.7184	0.7812	0.8804	0.3405	0.2268	0.4361	0.6571	0.3833	0.3798	0.3241
UDP-N-acetylglucosamine/galactosamine	2.0387	2.4149	1.8266	2.9232	1.8713	1.798	2.124	1.5656	1.5051	1.9167	1.0867	1.4266	1.3502	1.2837	1.3762	1.5776	1.597	0.9969	0.6985	1.0416	0.9471	0.9793	0.9194	0.7973	0.3838	0.328	0.3551	0.4185	0.3761	0.413	0.4252
uracil	0.3179	0.3974	0.3043	0.4722	0.3043	0.4578	0.4892	0.3376	0.3223	0.4715	0.7224	0.9479	1.1856	0.9215	1.2368	1.1426	1.1545	1.5357	1.3995	1.6577	1.4699	1.7419	1.2688	1.1285	0.9973	1.0122	0.7932	0.799	0.7225	0.8791	1.1283
urate	0.6444	0.2831	0.6506	0.4171	0.7737	0.6392	0.3336	0.5279	0.4793	0.6116	0.6984	0.4419	0.6784	0.3226	1.0245	0.8506	0.9468	1.4591	1.5038	1.4779	1.2625	1.0237	0.6261	1.165	1.0948	1.2201	1.5014	1.184	1.2611	1.2658	0.9871
urea	2.1359	2.1916	1.6401	2.6699	1.8301	0.8427	1.0305	0.6458	0.6555	0.9417	0.7725	0.8479	0.8869	0.9426	0.7794	0.9939	0.9307	1.1039	1.1204	1.0563	1.0681	1.2691	1.1813	0.9951	0.9667	0.7884	0.9109	0.7984	0.7441	1.0112	0.9614
uridine	1.1852	1.343	1.1723	1.5611	0.9928	1.1717	0.9337	0.9723	0.8763	1.1371	1.0592	0.8628	1.2282	1.2544	1.0652	0.9537	1.1791	1.0189	0.9526	1.1007	1.3384	1.2867	1.2844	0.9334	0.9296	0.6584	0.9783	0.8351	0.754	1.0006	0.9184
valine	1.1322	1.4515	1.1054	1.7953	1.0663	0.9843	1.0177	0.7833	0.7223	1.021	0.8381	0.9596	0.9828	0.8214	1.0312	1.1529	1.1685	1.4929	1.3064	1.577	1.4212	1.6725	1.3182	1.1504	0.9826	0.8945	0.8605	0.7697	0.7497	0.9393	0.9985
xanthine	0.1925	0.2803	0.1891	0.2853	0.2279	0.2776	0.2676	0.2054	0.2113	0.2379	0.7397	0.6752	0.8095	0.676	0.9007	0.694	0.7678	1.552	1.3607	1.676	1.5335	1.6116	1.3495	1.3087	1.1948	1.1018	1.088	1.0034	0.9966	1.1943	1.2378
xanthosine	0.4655	0.6707	0.4709	0.6979	0.5202	0.4758	0.4785	0.3976	0.3604	0.3219	0.2916	0.2539	0.2889	0.2481	0.294	0.3082	0.3299	1.1715	1.1413	1.3949	1.1962	1.1561	1.3305	0.9646	1.4388	1.1347	1.4153	1.7798	1.0354	1.6214	1.1544
xylulose 5-phosphate	0.0916	0.2179	0.0916	0.3367	0.2663	0.6089	0.2693	0.2704	0.4054	0.3392	0.6035	1.3026	1.6125	0.8445	1.1997	1.4044	1.6315	1.1476	0.7507	1.618	1.1679	2.4092	1.9955	0.9013	0.8856	1.1994	0.7109	0.4844	1.0208	0.9052	2.288
Figure 1c
Total peak number	PN1	PN7	PN17	PN24	PN80
	384	396	391	428	412
	402	401	408	432	418
	376	387	412	435	417
	402	392	402	435	401
	398	397	418	436	405
			419	436	408
			421	428	417
MEAN	392.4	394.6	410.143	432.857	411.143
SEM	5.26878	2.37908	4.07915	1.35275	2.52066
n	5	5	7	7	7
Total scaled intensity	PN1	PN7	PN17	PN24	PN80
	0.762516	0.810009	0.876973	1.24033	1.08071
	0.888582	0.831175	0.983501	1.18346	1.01829
	0.741875	0.728268	1.00487	1.33029	1.00019
	0.987597	0.722381	0.952489	1.27728	0.973203
	0.753067	0.834688	1.00243	1.35644	0.91989
			1.06105	1.23617	1.04854
			1.07917	1.10384	1.16917
MEAN	0.826727	0.785304	0.994355	1.24683	1.03
SEM	0.0481944	0.0248653	0.025573	0.0325593	0.0303398
n	5	5	7	7	7
Figure 1d
Percentages	PN7 vs. PN1	PN17 vs. PN7	PN24 vs. PN17	PN80 vs. PN24
Non-significant change	50.4405	37.2247	36.3436	27.9736
Significantly downregulated	28.6344	16.0793	17.4009	64.3172
Significantly upregulated	20.9251	46.696	46.2555	7.70925
Number significantly downregulated	Amino acids	Peptides	Carbohydrates	Energy	Lipids	Nucleotides	Cofactors and vitamins	Xenobiotics	Total
PN7 vs. PN1	54	8	19	0	12	23	7	7	130
PN17 vs. PN7	19	4	13	0	10	22	3	2	73
PN24 vs. PN17	37	1	8	2	12	15	3	1	79
PN80 vs. PN24	104	24	35	7	55	38	17	12	292
Number ignificantly upregulated	Amino acids	Peptides	Carbohydrates	Energy	Lipids	Nucleotides	Cofactors and vitamins	Xenobiotics	Total
PN7 vs. PN1	23	2	12	3	39	3	11	2	95
PN17 vs. PN7	79	11	27	8	49	15	19	4	212
PN24 vs. PN17	63	21	17	5	51	21	20	12	210
PN80 vs. PN24	10	1	3	2	12	3	1	3	35

## Sheet: Figure supplement 1-Source Data
Figure 1-Figure supplement 1-Source Data 1
											Two-Way ANOVA			Fold of Change			One-Way ANOVA	Fold of Change										One-Way ANOVA	Fold of Change
	Heat map of statistically significant biochemicals profiled in this study. Red and green shaded cells indicate p≤0.05 (red indicates that the mean values are significantly higher for that comparison; green values significantly lower). Light red and light green shaded cells indicate 0.05<p<0.10 (light red indicates that the mean values trend higher for that comparison; light green values trend low…													ANOVA Contrasts				ANOVA Contrasts											ANOVA Contrasts				Statistical Values
														Trained Naïve				Naïve											Trained				Two-Way ANOVA						ANOVA Contrasts						One-Way ANOVA		ANOVA Contrasts
											Age Main Effect	Training Main Effect	Age:Training Interaction				Naive Age Effect	PN7 PN1	PN17 PN1	PN24 PN1	PN1 PN80	PN17 PN7	PN24 PN7	PN7 PN80	PN24 PN17	PN17 PN80	PN24 PN80	Trained Age Effect	PN24 PN17	PN17 PN80	PN24 PN80		Age Main Effect		Training Main Effect		Age:Training Interaction		PN17 Trained / PN17 Naïve		PN24 Trained / PN24 Naïve		PN80 Trained / PN80 Naïve		Naive Age Effect		PN7 Naïve / PN1 Naïve		PN17 Naïve / PN1 Naïve
	Pathway Sort Order	Super Pathway	Sub Pathway	Biochemical Name	Platform	Comp ID	KEGG	HMDB	PUBCHEM	X				PN17	PN24	PN80																X	p-value	q-value	p-value	q-value	p-value	q-value	p-value	q-value	p-value	q-value	p-value	q-value	p-value	q-value	p-value	q-value	p-value
	1	Amino Acid	Glycine, Serine and Threonine Metabolism	glycine	LC/MS pos early	58	C00037	HMDB00123	750					0.87	1.01	1.06		0.66	0.59	1.06	0.91	0.89	1.6	0.6	1.81	0.54	0.97		2.09	0.44	0.92		0	0	0.5024	0.7062	0.0504	0.1986	0.0209	0.1058	0.8377	1	0.3068	0.9286	2.13e-10	1.64e-12	1.4505e-05	5.9031e-05	6.8665e-08
	5			dimethylglycine	LC/MS pos early	5086	C01026	HMDB00092	673					0.9	1.05	1.1		0.73	0.69	0.21	12.49	0.94	0.29	9.14	0.3	8.63	2.61		0.35	7.1	2.49		0	0	0.8357	0.8004	0.4567	0.4827	0.3719	0.4483	0.6078	1	0.4591	0.9577	0	0	0.0341	0.0517	0.0093
	6			betaine	LC/MS pos early	3141	C00719	HMDB00043	247					0.87	1	0.9		1.04	1.37	1.63	1.12	1.32	1.57	1.16	1.19	1.53	1.82		1.37	1.48	2.03		3.38e-13	1.5e-14	0.1112	0.6978	0.4555	0.4827	0.0927	0.2022	0.9726	1	0.2635	0.8797	1.21e-05	5.88e-08	0.6051	0.5427	0.0054
	7			betaine aldehyde	LC/MS pos early	15499	C00576	HMDB01252	249					1.13	1.07	1.02		1.93	2.45	10.87	0.13	1.27	5.63	0.25	4.44	0.31	1.39		4.19	0.35	1.46		2.07e-13	9e-15	0.8369	0.8004	0.932	0.6805	0.8589	0.7235	0.7438	1	0.8357	1	8.3e-14	1e-15	0.0023	0.0049	1.4606e-05
	9			serine	LC/MS pos early	1648	C00065	HMDB00187	5951					0.87	0.99	1.04		0.66	0.86	0.98	1.26	1.3	1.48	0.83	1.14	1.09	1.23		1.29	0.91	1.18		6.6541e-06	1.3574e-07	0.2699	0.6978	0.07	0.2178	0.0154	0.0889	0.9181	1	0.4839	0.9577	2.01e-05	9.46e-08	9.4142e-06	4.132e-05	0.0574
	10			N-acetylserine	LC/MS pos early	37076		HMDB02931	65249					0.97	1	1.02		0.83	1.06	1.25	1.17	1.28	1.51	0.97	1.18	1.24	1.46		1.22	1.17	1.43		7.4535e-10	2.1804e-11	0.9943	0.825	0.9002	0.6736	0.7454	0.6728	0.9942	1	0.7492	1	2.59e-06	1.34e-08	0.012	0.0211	0.5069
	15			2-methylserine	LC/MS pos early	53229	C02115		94309					0.88	1.07	0.94		0.12	0.12	0.59	5.1	1.06	5.06	0.6	4.8	0.63	3.02		5.8	0.59	3.44		1.4492e-08	3.5967e-10	0.8367	0.8004	0.5977	0.552	0.5937	0.5854	0.3778	1	0.9961	1	1.77e-05	8.38e-08	1.9127e-05	7.503e-05	1.8538e-05
	16			threonine	LC/MS pos early	1284	C00188	HMDB00167	6288					0.86	0.98	1.01		0.86	0.9	1.09	1.12	1.05	1.27	0.96	1.21	1.02	1.23		1.38	0.86	1.19		4.7994e-06	9.9983e-08	0.1849	0.6978	0.1276	0.2829	0.0196	0.1045	0.7827	1	0.7063	0.9963	0.0502	0.0002	0.1588	0.1958	0.3576
	17			N-acetylthreonine	LC/MS neg	33939			152204					0.93	0.96	0.99		0.85	0.96	1.07	1.4	1.13	1.25	1.19	1.11	1.34	1.49		1.15	1.27	1.45		3.7003e-06	7.8272e-08	0.6629	0.7438	0.8407	0.6511	0.5039	0.5406	0.8069	1	0.8738	1	0.0053	2.11e-05	0.2163	0.2524	0.6967
	18			allo-threonine	LC/MS polar	15142	C05519	HMDB04041	99289					0.82	0.94	0.98		1.38	2.26	2.6	0.61	1.64	1.89	0.84	1.15	1.38	1.59		1.32	1.16	1.53		6.5404e-07	1.4551e-08	0.0736	0.6978	0.4844	0.4906	0.048	0.156	0.492	1	0.6552	0.9955	3.76e-10	2.84e-12	0.0018	0.0041	1.787e-09
	28		Alanine and Aspartate Metabolism	alanine	LC/MS pos early	1126	C00041	HMDB00161	5950					0.83	0.96	1.04		0.7	0.86	0.96	1.32	1.23	1.36	0.93	1.11	1.14	1.26		1.29	0.91	1.17		2.3493e-05	4.5241e-07	0.072	0.6978	0.0275	0.1868	0.0025	0.0466	0.5314	1	0.508	0.9577	6.86e-05	3.15e-07	5.2332e-05	0.0002	0.0396
	30			N-acetylalanine	LC/MS polar	1585	C02847	HMDB00766	88064					0.82	0.94	0.98		0.96	1.92	3.13	0.42	2	3.25	0.4	1.63	0.8	1.3		1.86	0.67	1.24		6.3246e-10	1.8822e-11	0.1088	0.6978	0.2869	0.3929	0.0337	0.1274	0.5233	1	0.9967	1	1.42e-11	1.27e-13	0.7611	0.6338	2.0064e-06
	31			N-methylalanine	LC/MS pos early	37069	C02721	HMDB01906	5288725					1.27	0.56	1.01		0.6	0.41	0.25	3.46	0.68	0.41	2.09	0.6	1.42	0.85		0.26	1.79	0.47		0.002	3.3796e-05	0.7365	0.771	0.1492	0.2936	0.3308	0.4163	0.0859	1	0.848	1	0.0022	9.01e-06	0.2542	0.2837	0.0141
	34			aspartate	LC/MS pos early	443	C00049	HMDB00191	5960					0.92	1.04	1.11		0.9	1.68	2.95	0.51	1.87	3.28	0.46	1.76	0.85	1.5		1.97	0.71	1.41		0	0	0.4749	0.7062	0.056	0.2036	0.1427	0.2569	0.4504	1	0.0546	0.5168	1e-14	0	0.2544	0.2837	1.5729e-07
	35			N-acetylaspartate (NAA)	LC/MS neg	22185	C01042	HMDB00812	65065					0.9	0.99	1.01		1.43	5.65	7.87	0.13	3.96	5.52	0.19	1.39	0.74	1.04		1.54	0.66	1.02		0	0	0.1221	0.6978	0.0782	0.2252	0.0079	0.0678	0.8693	1	0.8162	1	0	0	3.0627e-07	1.7494e-06	0
	38			asparagine	LC/MS pos early	512	C00152	HMDB00168	6267					0.79	0.98	1.04		0.93	1.19	1.23	1.19	1.29	1.33	1.11	1.03	1.42	1.47		1.27	1.08	1.38		2.4776e-07	5.6588e-09	0.1104	0.6978	0.0251	0.1868	0.0027	0.0466	0.8041	1	0.5273	0.9577	9.52e-05	4.31e-07	0.4363	0.4253	0.0401
	39			N-acetylasparagine	LC/MS pos early	33942		HMDB06028	99715					0.98	1.08	1.07		0.77	1.29	1.7	0.92	1.67	2.2	0.71	1.31	1.19	1.56		1.45	1.09	1.58		3.3277e-05	6.3724e-07	0.4964	0.7062	0.9026	0.6736	0.9787	0.7515	0.5559	1	0.5731	0.9955	0.0002	8.7e-07	0.1111	0.1433	0.107
	41		Glutamate Metabolism	glutamate	LC/MS pos early	57	C00025	HMDB00148	611					0.91	1.01	1.05		0.95	1.37	1.8	0.68	1.45	1.9	0.64	1.31	0.93	1.22		1.45	0.81	1.18		1.1e-14	1e-15	0.6374	0.74	0.0177	0.1868	0.0121	0.0806	0.7266	1	0.1507	0.7772	8.7e-14	1e-15	0.3135	0.3303	1.2688e-07
	42			glutamine	LC/MS pos early	53	C00064	HMDB00641	5961					0.86	1.04	1.12		0.71	0.94	1.43	0.82	1.33	2.02	0.58	1.51	0.78	1.18		1.83	0.6	1.09		0	0	0.8996	0.8095	0.0013	0.1024	0.0028	0.0466	0.4965	1	0.0271	0.3744	4.99e-09	3.38e-11	0.0002	0.0007	0.5942
	43			alpha-ketoglutaramate	LC/MS polar	62101								1.3	1.02	0.81		2.42	5.43	11.52	0.09	2.24	4.76	0.23	2.12	0.51	1.08		1.67	0.81	1.35		0.1002	0.0016	0.991	0.825	0.381	0.4461	0.3291	0.4163	0.9749	1	0.3233	0.9349	5.12e-05	2.36e-07	0.2283	0.2626	0.0085
	44			N-acetylglutamate	LC/MS pos early	15720	C00624	HMDB01138	70914					0.95	1.01	1.11		1.53	5.97	8.6	0.15	3.9	5.62	0.23	1.44	0.89	1.28		1.53	0.76	1.16		1.55e-13	7e-15	0.4226	0.7062	0.0618	0.205	0.279	0.3823	0.8646	1	0.0254	0.3744	0	0	4.6424e-06	2.1905e-05	0
	45			N-acetylglutamine	LC/MS pos early	33943	C02716	HMDB06029	182230					0.88	1.22	1.16		0.92	2.69	4	0.28	2.93	4.36	0.26	1.49	0.75	1.12		2.06	0.57	1.18		0.0002	3.0957e-06	0.4561	0.7062	0.3234	0.4091	0.4367	0.4901	0.2158	1	0.4111	0.9577	7.84e-09	5.21e-11	0.655	0.5768	1.3498e-05
	50			glutamate, gamma-methyl ester	LC/MS pos early	33487		HMDB61715	68662					0.86	1.14	1.05		0.85	1.26	1.82	0.53	1.48	2.14	0.45	1.44	0.67	0.97		1.92	0.55	1.05		1.3513e-10	4.321e-12	0.8264	0.8002	0.0618	0.205	0.0799	0.1829	0.1276	1	0.5358	0.9653	5.02e-09	3.39e-11	0.1271	0.1617	0.0212
	51			pyroglutamine	LC/MS pos early	46225			134508					0.95	1.02	1.1		1.52	9.5	25.43	0.04	6.24	16.72	0.06	2.68	0.38	1.01		2.88	0.32	0.93		0	0	0.4706	0.7062	0.0439	0.1986	0.1619	0.2749	0.6743	1	0.0295	0.3823	0	0	7.9539e-09	6.8148e-08	0
	52			N-acetyl-aspartyl-glutamate (NAAG)	LC/MS pos early	35665	C12270	HMDB01067	5255					0.88	1.01	1.05		1.24	1.36	1.09	1.18	1.09	0.88	1.46	0.81	1.6	1.29		0.93	1.33	1.23		4.4e-14	2e-15	0.3768	0.6978	0.009	0.15	0.0035	0.0473	0.7863	1	0.2005	0.8294	1.8e-10	1.4e-12	0.0001	0.0004	3.6274e-07
	53			beta-citrylglutamate	LC/MS neg	54923	C20775		72715786					0.88	0.99	1.04		0.87	0.3	0.15	14.37	0.34	0.17	12.55	0.5	4.33	2.19		0.57	3.67	2.08		0	0	0.334	0.6978	0.0906	0.2389	0.0256	0.1105	0.8658	1	0.4273	0.9577	0	0	0.0503	0.0724	0
	54			gamma-aminobutyrate (GABA)	LC/MS pos early	1416	C00334	HMDB00112	119					0.87	1.04	1.06		1.65	2.89	4.19	0.27	1.75	2.54	0.44	1.45	0.78	1.13		1.74	0.64	1.11		0	0	0.5841	0.7383	0.0036	0.1309	0.0023	0.0463	0.3209	1	0.1951	0.8294	0	0	1.2785e-09	1.4867e-08	0
	55			carboxyethyl-GABA	LC/MS pos early	40007		HMDB02201	2572					0.98	0.99	1.03		1.21	1.58	2.08	0.53	1.31	1.71	0.64	1.31	0.84	1.1		1.33	0.8	1.06		0.0002	4.0646e-06	0.8972	0.8095	0.9412	0.6805	0.999	0.7515	0.9021	1	0.728	0.9963	0.0013	5.43e-06	0.5838	0.5279	0.0196
	56			N-methyl-GABA	LC/MS pos early	39577	C15987		70703					1.18	0.98	1.2		0.77	1.69	12.54	0.11	2.18	16.18	0.09	7.42	0.19	1.42		6.2	0.19	1.16		0	0	0.1924	0.6978	0.5607	0.5291	0.1572	0.2729	0.9482	1	0.3628	0.9359	3.97e-13	5e-15	0.4898	0.4656	0.118
	59			S-1-pyrroline-5-carboxylate	LC/MS pos early	42370	C04322	HMDB01301	1196					0.95	1.2	1.26		1.5	2.66	5.05	1.19	1.78	3.37	1.78	1.9	3.17	6.01		2.39	2.41	5.75		1.7238e-11	6.3e-13	0.7564	0.7758	0.3164	0.4068	0.2887	0.387	0.4544	1	0.3945	0.9577	1.16e-07	6.88e-10	0.2195	0.2552	0.0003
	65		Histidine Metabolism	histidine	LC/MS neg	59	C00135	HMDB00177	6274					0.86	1.01	1.02		0.68	1.19	1.02	1.46	1.76	1.5	0.99	0.86	1.74	1.49		1	1.47	1.47		4e-15	0	0.228	0.6978	0.0445	0.1986	0.0076	0.0666	0.8514	1	0.6097	0.9955	1.53e-08	9.88e-11	0.0001	0.0004	0.0163
	66			1-methylhistidine	LC/MS pos early	30460	C01152	HMDB00001	92105					1.19	1.22	0.96		0.29	0.55	0.26	5.9	1.87	0.88	1.72	0.47	3.23	1.51		0.48	3.99	1.92		3.2908e-09	8.8372e-11	0.2753	0.6978	0.7921	0.6364	0.5076	0.5425	0.275	1	0.8885	1	3.78e-07	2.12e-09	0.0002	0.0005	0.0282
	67			3-methylhistidine	LC/MS pos early	15677	C01152	HMDB00479	64969					0.97	1.06	1.09		0.19	1.32	0.14	1.53	7.09	0.75	0.28	0.11	2.02	0.21		0.12	1.79	0.21		0	0	0.7736	0.7877	0.8843	0.6694	0.8131	0.7022	0.7075	1	0.7195	0.9963	3.77e-12	3.7e-14	1.114e-07	7.2541e-07	0.1382
	68			N-acetylhistidine	LC/MS pos early	33946	C02997	HMDB32055	75619					1.02	1.29	1.24		0.45	1.02	0.53	3.79	2.27	1.17	1.71	0.51	3.88	2		0.65	3.21	2.08		3.6108e-10	1.1082e-11	0.1706	0.6978	0.6176	0.5622	0.9204	0.7371	0.1429	1	0.4158	0.9577	1.88e-06	9.82e-09	0.0026	0.0054	0.8241
	70			N-acetyl-1-methylhistidine	LC/MS pos early	43255			193270					0.91	1.39	1.34		0.29	1.64	0.7	2.1	5.71	2.44	0.6	0.43	3.45	1.47		0.65	2.34	1.53		1.6195e-06	3.4793e-08	0.1482	0.6978	0.3579	0.4294	0.7429	0.6723	0.1358	1	0.181	0.8294	3.59e-05	1.67e-07	0.0021	0.0047	0.0495
	74			imidazole propionate	LC/MS pos early	40730		HMDB02271	70630					1	0.88	1.52		0.11	0.85	1.54	2.51	7.35	13.43	0.29	1.83	2.12	3.88		1.61	1.4	2.25		2.2233e-11	7.9e-13	0.2057	0.6978	0.0174	0.1868	0.9186	0.7371	0.4103	1	0.0031	0.1289	7.53e-12	7.1e-14	5.2715e-10	6.8652e-09	0.6429
	75			formiminoglutamate	LC/MS pos early	43493	C00439	HMDB00854	439233					0.79	0.94	1.05		0.4	0.78	0.47	4.12	1.97	1.18	1.63	0.6	3.21	1.92		0.71	2.43	1.73		2.1797e-11	7.8e-13	0.3367	0.6978	0.4469	0.4803	0.1428	0.2569	0.6184	1	0.7552	1	1.4e-08	9.11e-11	2.4692e-05	9.348e-05	0.1481
	76			imidazole lactate	LC/MS pos early	15716	C05568	HMDB02320	440129					0.8	1	1.1		0.99	2.17	0.82	2.57	2.2	0.84	2.54	0.38	5.57	2.12		0.48	4.06	1.94		0	0	0.5762	0.7342	0.2976	0.3964	0.1257	0.2403	0.988	1	0.5482	0.9838	1.15e-11	1.05e-13	0.9957	0.7171	6.657e-06
	77			carnosine	LC/MS pos early	1768	C00386	HMDB00033	439224					0.87	0.91	1.03		1	1.78	8.82	0.07	1.78	8.82	0.07	4.96	0.13	0.63		5.18	0.11	0.55		0	0	0.2866	0.6978	0.574	0.5372	0.2433	0.3488	0.366	1	0.8206	1	0	0	1	0.7171	1.7082e-05
	78			homocarnosine	LC/MS pos early	1633	C00884	HMDB00745	10243361					0.89	0.93	1.11		1.29	371.71	1758.43	0	289.11	1367.67	0	4.73	0.23	1.1		4.93	0.19	0.92		0	0	0.5134	0.7062	0.1672	0.305	0.1662	0.278	0.3714	1	0.2477	0.8797	0	0	0.0445	0.0647	0
	83			1-methyl-4-imidazoleacetate	LC/MS pos early	32350	C05828	HMDB02820	75810					0.9	1.09	1.52		0.4	2.5	2.96	0.68	6.26	7.41	0.27	1.18	1.7	2.01		1.43	1.01	1.44		2.7582e-11	9.53e-13	0.0033	0.6129	6.8195e-05	0.0182	0.1759	0.2886	0.2432	1	2.0179e-06	0.0009	9.65e-12	8.9e-14	0.0002	0.0005	7.1296e-07
	84			1-ribosyl-imidazoleacetate	LC/MS pos early	61868	C05131	HMDB02331	5117448					0.66	1	1.02		0.03	0.16	0.04	95.13	4.9	1.17	3.13	0.24	15.36	3.66		0.36	10.02	3.6		0	0	0.1626	0.6978	0.3883	0.4504	0.0591	0.1716	0.6891	1	0.9076	1	0	0	5e-15	3.74e-13	8.8065e-10
	85			4-imidazoleacetate	LC/MS pos early	32349	C02835	HMDB02024	96215					0.7	0.65	1.76		0.09	0.21	0.08	68.88	2.22	0.82	6.48	0.37	14.4	5.29		0.34	5.7	1.95		1.5142e-10	4.819e-12	0.238	0.6978	0.1776	0.3153	0.3087	0.4035	0.0745	1	0.4339	0.9577	1.44e-12	1.5e-14	6.8799e-08	4.7659e-07	8.1972e-06
	91		Lysine Metabolism	lysine	LC/MS pos early	1301	C00047	HMDB00182	5962					0.86	1.02	1.04		0.84	1.14	1.32	1.16	1.36	1.58	0.98	1.16	1.33	1.54		1.37	1.1	1.51		3.18e-12	1.27e-13	0.3014	0.6978	0.0272	0.1868	0.0063	0.0666	0.7448	1	0.455	0.9577	3.27e-07	1.85e-09	0.0301	0.0465	0.0454
	98			N6,N6,N6-trimethyllysine	LC/MS pos early	1498	C03793	HMDB01325	440120					0.79	1.08	0.91		0.6	0.66	0.66	1.61	1.11	1.1	0.96	0.99	1.06	1.06		1.37	0.92	1.26		0.1133	0.0018	0.3698	0.6978	0.2483	0.3672	0.0857	0.1936	0.5291	1	0.6615	0.9955	0.0328	0.0001	0.0078	0.0144	0.0152
	100			5-(galactosylhydroxy)-L-lysine	LC/MS pos early	43582								0.89	0.99	1.02		0.63	0.66	0.66	2.95	1.04	1.04	1.86	1	1.93	1.93		1.12	1.68	1.88		0	0	0.4628	0.7062	0.26	0.3762	0.0894	0.1981	0.9343	1	0.5905	0.9955	5.77e-12	5.5e-14	1.5283e-05	6.0681e-05	1.7012e-05
	101			saccharopine	LC/MS pos early	1495	C00449	HMDB00279	160556					0.8	0.92	1.26		1	2.22	6.83	0.26	2.22	6.83	0.26	3.08	0.57	1.75		3.53	0.36	1.28		4.7694e-11	1.607e-12	0.7485	0.7739	0.1506	0.2936	0.2556	0.3567	0.4071	1	0.1601	0.7985	6.57e-13	7e-15	1	0.7171	7.5315e-05
	102			2-aminoadipate	LC/MS polar	6146	C00956	HMDB00510	469					0.92	0.84	1.09		0.46	1.08	2.34	1.08	2.33	5.06	0.5	2.17	1.17	2.53		1.98	0.99	1.95		2.7384e-11	9.51e-13	0.4739	0.7062	0.2734	0.3828	0.5917	0.5851	0.1395	1	0.4298	0.9577	1.47e-10	1.17e-12	1.088e-05	4.5414e-05	0.6507
	106			glutarylcarnitine (C5-DC)	LC/MS pos early	44664		HMDB13130	71464488					0.79	1.02	0.96		0.76	7.39	18.77	0.11	9.76	24.79	0.09	2.54	0.84	2.13		3.27	0.69	2.27		8.8863e-06	1.7759e-07	0.1693	0.6978	0.4168	0.4591	0.0663	0.1738	0.8867	1	0.6971	0.9963	0	0	0.2579	0.2856	3.81e-13
	110			pipecolate	LC/MS pos early	1444	C00408	HMDB00070	849					0.86	1.04	1		0.18	0.17	0.09	13.75	0.93	0.53	2.46	0.57	2.3	1.31		0.69	1.97	1.36		1.004e-11	3.83e-13	0.5746	0.7342	0.3383	0.4171	0.1369	0.2511	0.6289	1	0.9581	1	0	0	1.119e-12	3.5954e-11	6.9e-14
	114			5-aminovalerate	LC/MS pos early	18319	C00431	HMDB03355	138					1.13	0.99	0.91		1.43	2.3	3.03	0.27	1.61	2.12	0.38	1.32	0.61	0.81		1.15	0.77	0.88		0.0002	3.7134e-06	0.9349	0.8115	0.4727	0.4865	0.3502	0.4298	0.9975	1	0.4285	0.9577	9.81e-10	7.11e-12	0.0136	0.0233	2.1182e-06
	115			N-trimethyl 5-aminovalerate	LC/MS pos early	57687								0.88	1.03	0.7		1.65	1.26	1.46	0.2	0.77	0.89	0.32	1.16	0.25	0.29		1.36	0.31	0.42		3.85e-13	1.7e-14	0.0766	0.6978	0.1638	0.305	0.3593	0.4377	0.7959	1	0.0175	0.3616	6.9e-11	5.75e-13	0.0026	0.0054	0.108
	116		Phenylalanine Metabolism	phenylalanine	LC/MS pos early	64	C00079	HMDB00159	6140					0.86	1.03	1.03		0.77	1.04	1.35	0.99	1.34	1.74	0.77	1.3	1.03	1.33		1.55	0.86	1.34		3.1533e-09	8.5345e-11	0.4404	0.7062	0.0704	0.2178	0.0215	0.1065	0.5959	1	0.6086	0.9955	1.41e-06	7.48e-09	0.003	0.0061	0.5664
	117			N-acetylphenylalanine	LC/MS neg	33950	C03519	HMDB00512	74839					0.97	1.12	1.06		0.73	1.42	1.14	1.84	1.95	1.57	1.34	0.8	2.61	2.1		0.93	2.38	2.2		1.9696e-08	4.7845e-10	0.5527	0.7197	0.8334	0.6511	0.8835	0.7334	0.5438	1	0.5703	0.9955	0.0002	8.7e-07	0.2653	0.2898	0.0852
	132		Tyrosine Metabolism	tyrosine	LC/MS pos early	1299	C00082	HMDB00158	6057					0.87	1.03	1.01		1.02	1.09	1.26	1.04	1.06	1.23	1.06	1.16	1.13	1.31		1.37	0.97	1.33		4.1711e-06	8.7424e-08	0.5989	0.74	0.1782	0.3153	0.0714	0.1753	0.59	1	0.6954	0.9963	0.0294	0.0001	0.7884	0.6492	0.3725
	133			N-acetyltyrosine	LC/MS neg	32390		HMDB00866	68310					1.02	1.35	0.91		1.46	2.04	1.23	1.15	1.39	0.84	1.67	0.61	2.33	1.41		0.8	2.62	2.11		7.1525e-07	1.5862e-08	0.3514	0.6978	0.3266	0.4111	0.8969	0.7354	0.086	1	0.796	1	0.0115	4.51e-05	0.1762	0.214	0.0082
	141			4-hydroxyphenylpyruvate	LC/MS neg	1669	C01179	HMDB00707	979					1.33	0.91	1		0.8	0.6	1.21	2.26	0.75	1.52	1.8	2.03	1.35	2.74		1.39	1.8	2.5		7.6965e-07	1.6959e-08	0.6251	0.74	0.389	0.4504	0.1746	0.2884	0.6106	1	0.9861	1	0.0007	2.95e-06	0.3631	0.3715	0.0281
	144			3-(4-hydroxyphenyl)lactate	LC/MS neg	32197	C03672	HMDB00755	9378					1.01	1.04	0.96		1.13	1.38	1.34	0.83	1.22	1.18	0.93	0.97	1.14	1.11		1	1.2	1.2		0.096	0.0015	0.8074	0.7988	0.751	0.6257	0.9249	0.7372	0.4879	1	0.7132	0.9963	0.0864	0.0003	0.3326	0.3482	0.0109
	148			phenol sulfate	LC/MS neg	32553	C02180	HMDB60015	74426					1.16	1.38	0.87		0.72	0.72	2.39	0.53	1	3.33	0.38	3.33	0.38	1.27		3.96	0.5	2		2.0859e-08	5.0494e-10	0.5367	0.7155	0.2213	0.3519	0.6328	0.6101	0.1301	1	0.3481	0.9359	8.05e-06	3.95e-08	0.364	0.3715	0.3275
	162			3-methoxytyrosine	LC/MS pos early	12017		HMDB01434	1670					0.82	0.94	0.86		2.99	6.23	0.6	3.66	2.08	0.2	10.94	0.1	22.82	2.19		0.11	21.84	2.4		0	0	0.3946	0.7025	0.9195	0.6798	0.4328	0.4897	0.832	1	0.6304	0.9955	1.83e-13	2e-15	0.0001	0.0004	2.6648e-08
	174			o-Tyrosine	LC/MS pos early	43392		HMDB06050	91482					0.7	0.97	1.15		0.66	0.45	0.78	2.32	0.68	1.19	1.52	1.74	1.04	1.81		2.41	0.64	1.53		7.6719e-09	1.9828e-10	0.3822	0.6978	0.0227	0.1868	0.0109	0.0759	0.8114	1	0.1722	0.8269	2.99e-06	1.52e-08	0.0124	0.0215	6.4294e-06
	182			dopamine 4-sulfate	LC/MS neg	48406	C13691	HMDB04148	123932					1.44	0.83	1		0.64	0.42	0.18	13.67	0.66	0.27	8.8	0.42	5.77	2.41		0.24	8.33	2		7.9108e-09	2.0369e-10	0.9333	0.8115	0.3944	0.4517	0.3011	0.3974	0.3724	1	1	1	3.08e-10	2.33e-12	0.1113	0.1433	0.0003
	183			dopamine 3-O-sulfate	LC/MS neg	48407	C13690	HMDB06275	122136					0.96	0.95	0.81		0.86	0.73	0.83	3.59	0.85	0.97	3.09	1.14	2.62	2.98		1.13	3.12	3.52		3.85e-13	1.7e-14	0.4579	0.7062	0.4663	0.4846	0.7288	0.663	0.7971	1	0.173	0.8269	2.36e-06	1.23e-08	0.4799	0.4609	0.0626
	186			N-formylphenylalanine	LC/MS neg	48433			759256					0.96	1.17	1.07		0.59	0.43	0.5	3.52	0.74	0.85	2.07	1.15	1.52	1.75		1.41	1.37	1.93		1.7794e-06	3.8109e-08	0.484	0.7062	0.5809	0.5412	0.7266	0.6628	0.2654	1	0.6584	0.9955	3.68e-07	2.07e-09	0.0039	0.0076	7.3826e-06
	206		Tryptophan Metabolism	tryptophan	LC/MS pos early	54	C00078	HMDB00929	6305					0.83	1	1.06		0.52	0.62	0.72	1.82	1.19	1.37	0.96	1.15	1.13	1.31		1.39	0.89	1.24		5.1522e-06	1.0669e-07	0.2555	0.6978	0.0273	0.1868	0.0062	0.0666	0.9872	1	0.3626	0.9359	3.39e-05	1.58e-07	1.0116e-05	4.3336e-05	0.0003
	213			C-glycosyltryptophan	LC/MS neg	48782			10981970					0.93	1	1.01		1.03	1.85	2.81	0.63	1.81	2.74	0.64	1.52	1.16	1.76		1.65	1.07	1.75		7e-15	0	0.6097	0.74	0.5314	0.5122	0.2292	0.3426	0.8851	1	0.8538	1	6.76e-13	7e-15	0.6602	0.5794	1.9729e-08
	217			kynurenine	LC/MS pos early	15140	C00328	HMDB00684	161166					1.06	1.4	1.1		0.53	3.27	0.69	0.68	6.12	1.29	0.37	0.21	2.24	0.47		0.28	2.16	0.6		0	0	0.0289	0.6978	0.3234	0.4091	0.6783	0.6393	0.0166	1	0.3186	0.9338	2.65e-09	1.84e-11	0.0197	0.0323	4.6948e-07
	219			N-acetylkynurenine (2)	LC/MS pos early	48757								1.1	1	1		1	4.57	1	1	4.57	1	1	0.22	4.57	1		0.2	5.01	1		0	0	0.6129	0.74	0.7722	0.6311	0.3826	0.4559	1	1	1	1	0	0	1	0.7171	0
	223			N-formylanthranilic acid	LC/MS polar	43549	C05653	HMDB04089	101399					1.28	0.77	1.07		0.75	0.33	0.34	3.98	0.44	0.45	2.99	1.01	1.33	1.34		0.61	1.58	0.96		0.0123	0.0002	0.793	0.7927	0.1166	0.2741	0.1261	0.2403	0.1586	1	0.7423	1	6.35e-06	3.15e-08	0.5622	0.5113	0.0001
	233			5-hydroxyindoleacetate	LC/MS neg	437	C05635	HMDB00763	1826					0.86	1.11	1.17		1.61	5.31	9.38	0.17	3.3	5.83	0.28	1.77	0.93	1.64		2.27	0.68	1.56		6.67e-13	2.8e-14	0.4509	0.7062	0.0249	0.1868	0.0698	0.175	0.2103	1	0.0636	0.5777	0	0	0.0001	0.0003	1e-15
	250			3-indoxyl sulfate	LC/MS neg	27672		HMDB00682	10258					1	1.01	0.83		1	1	3.87	0.58	1	3.87	0.58	3.87	0.58	2.25		3.9	0.7	2.73		3e-15	0	0.5062	0.7062	0.4715	0.4865	1	0.7515	0.8211	1	0.1728	0.8269	4.25e-11	3.65e-13	1	0.7171	1
	254		Leucine, Isoleucine and Valine Metabolism	leucine	LC/MS pos early	60	C00123	HMDB00687	6106					0.85	1.03	1.04		0.86	0.95	1.33	1.1	1.11	1.55	0.94	1.4	1.04	1.46		1.69	0.85	1.45		2.1524e-10	6.726e-12	0.4466	0.7062	0.081	0.2258	0.025	0.1101	0.6516	1	0.5846	0.9955	4.29e-05	1.99e-07	0.1078	0.1404	0.5907
	255			N-acetylleucine	LC/MS neg	1587	C02710	HMDB11756	70912					0.9	1.03	0.98		0.93	1.44	1.82	0.82	1.54	1.95	0.76	1.27	1.18	1.49		1.46	1.08	1.57		0.0014	2.4975e-05	0.7816	0.7897	0.7896	0.636	0.4769	0.5149	0.8537	1	0.9609	1	0.0035	1.4e-05	0.7142	0.6068	0.0606
	257			4-methyl-2-oxopentanoate	LC/MS neg	22116	C00233	HMDB00695	70					1.68	0.94	0.95		2.15	0.78	0.33	5.73	0.36	0.15	12.34	0.42	4.48	1.9		0.24	7.95	1.88		2.3677e-10	7.332e-12	0.4107	0.7048	0.2233	0.353	0.0624	0.1738	0.7735	1	0.8492	1	5.99e-08	3.7e-10	0.0415	0.0609	0.2368
	265			isovalerylcarnitine (C5)	LC/MS pos early	34407		HMDB00688	6426851					0.81	0.98	1.14		3.06	2.74	2.18	1.17	0.9	0.71	3.59	0.79	3.22	2.55		0.96	2.27	2.19		0	0	0.5083	0.7062	0.0475	0.1986	0.0274	0.114	0.8527	1	0.1922	0.8294	3.71e-12	3.7e-14	1.8923e-09	1.8885e-08	2.7267e-09
	272			beta-hydroxyisovalerate	LC/MS polar	12129		HMDB00754	69362					0.95	1.07	1.09		0.82	0.79	0.77	2.07	0.96	0.94	1.7	0.98	1.63	1.59		1.1	1.42	1.56		1.5103e-09	4.1866e-11	0.5365	0.7155	0.4845	0.4906	0.5332	0.5567	0.4383	1	0.3605	0.9359	1.68e-06	8.86e-09	0.1337	0.1694	0.0383
	275			3-methylglutaconate	LC/MS polar	57747		HMDB00522	1551553					0.81	1.08	1.16		1.48	2.02	1.78	1.27	1.36	1.2	1.88	0.88	2.56	2.26		1.17	1.8	2.11		1.2641e-11	4.67e-13	0.8659	0.8095	0.0766	0.2235	0.0789	0.182	0.3938	1	0.2231	0.8513	7.79e-07	4.26e-09	0.0119	0.021	3.2312e-05
	288			isoleucine	LC/MS pos early	1125	C00407	HMDB00172	6306					0.85	1.03	1.05		0.93	1.05	1.42	1.09	1.13	1.52	1.02	1.35	1.15	1.55		1.63	0.93	1.52		2.3464e-10	7.299e-12	0.4687	0.7062	0.0747	0.2199	0.0247	0.1101	0.7009	1	0.4958	0.9577	9.46e-06	4.61e-08	0.4267	0.4172	0.5167
	290			N-acetylisoleucine	LC/MS neg	33967		HMDB61684	2802421					0.87	1.11	1.18		0.95	1.15	1.34	1.05	1.21	1.4	1	1.16	1.21	1.4		1.47	0.9	1.32		0.0098	0.0002	0.5316	0.7155	0.3975	0.4536	0.4602	0.5034	0.4423	1	0.2945	0.9286	0.0809	0.0003	0.7475	0.6273	0.4046
	291			3-methyl-2-oxovalerate	LC/MS neg	15676	C00671	HMDB03736	47					1.28	1	1		1.56	1.05	0.49	2.05	0.67	0.31	3.19	0.47	2.15	1		0.36	2.74	1		1.715e-12	7.1e-14	0.2706	0.6978	0.2981	0.3964	0.0605	0.172	1	1	1	1	2.99e-08	1.89e-10	0.0063	0.012	0.7437
	292			alpha-hydroxyisovalerate	LC/MS polar	46537		HMDB00407	99823					0.91	0.99	1.2		0.44	0.29	0.29	12.55	0.66	0.65	5.58	0.97	3.7	3.6		1.06	2.8	2.96		5e-15	0	0.7286	0.765	0.4328	0.47	0.5519	0.5688	0.9931	1	0.2323	0.8716	7e-14	1e-15	3.8781e-05	0.0001	1.2647e-08
	294			2-methylbutyrylcarnitine (C5)	LC/MS pos early	45095		HMDB00378	6426901					0.77	1.1	1.22		4.26	3.39	2.51	0.63	0.8	0.59	2.69	0.74	2.14	1.59		1.06	1.35	1.43		0.0001	2.1218e-06	0.6979	0.7587	0.074	0.2199	0.0975	0.2066	0.293	1	0.1978	0.8294	6.31e-07	3.51e-09	2.4117e-07	1.4056e-06	9.6552e-07
	299			3-hydroxy-2-ethylpropionate	LC/MS polar	32397		HMDB00396	188979					0.89	0.98	1.2		1.03	0.91	0.33	3.15	0.88	0.32	3.26	0.36	2.88	1.04		0.4	2.13	0.85		3.6103e-10	1.1082e-11	0.9599	0.8163	0.6212	0.5622	0.5706	0.5777	0.8978	1	0.435	0.9577	1.19e-08	7.81e-11	0.8226	0.6629	0.422
	301			ethylmalonate	LC/MS polar	15765		HMDB00622	11756					0.81	0.86	0.97		0.77	1.06	1.2	1.4	1.37	1.55	1.09	1.13	1.49	1.69		1.21	1.24	1.5		0.0018	3.1285e-05	0.2337	0.6978	0.676	0.5947	0.1723	0.2867	0.592	1	0.8702	1	0.0458	0.0002	0.2523	0.2832	0.6253
	302			methylsuccinate	LC/MS polar	15745		HMDB01844	10349					0.9	1.05	0.94		1.5	2.06	4.32	0.72	1.37	2.87	1.09	2.09	1.49	3.12		2.45	1.42	3.48		0	0	0.4905	0.7062	0.4904	0.495	0.2908	0.3875	0.5807	1	0.4934	0.9577	7.56e-11	6.24e-13	0.0039	0.0077	2.7581e-06
	308			valine	LC/MS pos early	1649	C00183	HMDB00883	6287					0.82	1.03	1.06		0.69	0.76	1.08	1.48	1.1	1.57	1.02	1.43	1.12	1.6		1.79	0.87	1.56		2.2304e-11	7.9e-13	0.3782	0.6978	0.0369	0.1986	0.0103	0.0759	0.6664	1	0.4727	0.9577	7.13e-06	3.51e-08	0.0009	0.0022	0.0062
	311			3-methyl-2-oxobutyrate	LC/MS polar	44526	C00141	HMDB00019	49					1.07	0.98	1		0.96	0.88	0.34	3.14	0.92	0.35	3.02	0.38	2.76	1.05		0.35	2.96	1.03		1.8549e-11	6.75e-13	0.8281	0.8002	0.873	0.6679	0.5912	0.5851	0.8712	1	1	1	2.12e-08	1.36e-10	0.7529	0.6285	0.2513
	314			isobutyrylcarnitine (C4)	LC/MS pos early	33441		HMDB00736	168379					0.82	1.03	1.21		1.87	0.93	0.72	2.86	0.5	0.38	5.37	0.77	2.67	2.06		0.97	1.8	1.74		2.1119e-11	7.64e-13	0.9237	0.8115	0.0664	0.2132	0.0783	0.1818	0.9693	1	0.1169	0.7176	7.48e-13	8e-15	1.3125e-05	5.4093e-05	0.6019
	316			3-hydroxyisobutyrate	LC/MS polar	1549	C06001	HMDB00336	87					0.8	0.98	1.09		0.55	0.49	0.33	7.65	0.89	0.6	4.23	0.67	3.78	2.55		0.82	2.78	2.29		0	0	0.4518	0.7062	0.2009	0.3348	0.0708	0.1753	0.8983	1	0.5053	0.9577	3.7e-14	1e-15	0.0002	0.0005	6.8497e-06
	320		Methionine, Cysteine, SAM and Taurine Metabolism	methionine	LC/MS pos early	1302	C00073	HMDB00696	6137					0.85	1.06	1.07		1.07	1.49	2.15	0.67	1.39	2.01	0.71	1.45	0.99	1.43		1.79	0.79	1.42		4.0643e-11	1.39e-12	0.7861	0.79	0.0355	0.1986	0.0234	0.1101	0.3914	1	0.3117	0.9311	4.45e-10	3.31e-12	0.3446	0.3573	1.1956e-05
	321			N-acetylmethionine	LC/MS neg	1589	C02712	HMDB11745	448580					0.88	1.02	1.01		1.19	2.87	4.1	0.24	2.4	3.43	0.29	1.43	0.7	1		1.66	0.61	1.02		6.1744e-10	1.8455e-11	0.3432	0.6978	0.2594	0.3762	0.0637	0.1738	0.8012	1	0.9969	1	0	0	0.0125	0.0215	1e-15
	322			N-formylmethionine	LC/MS neg	2829	C03145	HMDB01015	439750					0.94	0.99	1.07		0.8	1.08	1.72	1.07	1.34	2.15	0.86	1.6	1.15	1.84		1.69	1	1.69		8e-15	0	0.978	0.8242	0.329	0.4111	0.3319	0.4163	0.9094	1	0.2593	0.8797	4.67e-09	3.19e-11	0.0234	0.0373	0.3541
	325			methionine sulfoxide	LC/MS pos early	18374	C02989	HMDB02005	158980					0.98	0.98	1		0.95	1.4	1.54	1.04	1.47	1.62	0.99	1.1	1.45	1.59		1.1	1.41	1.55		5.213e-06	1.0762e-07	0.9324	0.8115	0.928	0.6805	0.7527	0.674	0.8198	1	0.9526	1	0.0026	1.05e-05	0.7775	0.644	0.0538
	326			N-acetylmethionine sulfoxide	LC/MS pos early	45428			193368					1.05	1.01	1.02		1.21	2.6	2.52	0.42	2.15	2.08	0.51	0.97	1.09	1.05		0.92	1.12	1.04		0.4842	0.0074	0.4972	0.7062	0.8546	0.6581	0.4032	0.4679	0.9259	1	0.8052	1	1.32e-08	8.63e-11	0.1347	0.17	6.238e-08
	331			S-adenosylmethionine (SAM)	LC/MS pos early	15915	C00019	HMDB01185	34756					0.8	0.98	1.13		0.81	1	0.92	1.82	1.23	1.13	1.47	0.92	1.81	1.67		1.13	1.28	1.45		2.4136e-11	8.51e-13	0.3437	0.6978	0.0038	0.1309	0.0023	0.0463	0.8698	1	0.083	0.6387	9.33e-08	5.59e-10	0.0347	0.0522	0.9335
	332			S-adenosylhomocysteine (SAH)	LC/MS neg	42382	C00021	HMDB00939	439155					0.9	1.07	1.05		1.13	1.25	1.11	0.78	1.1	0.98	0.88	0.89	0.97	0.86		1.05	0.84	0.88		0.1014	0.0016	0.9027	0.8095	0.2584	0.3762	0.1619	0.2749	0.4507	1	0.6537	0.9955	0.0272	0.0001	0.1691	0.2061	0.0095
	336			cystathionine	LC/MS pos early	15705	C02291	HMDB00099	439258					0.86	1	1.18		0.56	0.19	0.1	17.21	0.35	0.18	9.56	0.51	3.36	1.72		0.59	2.45	1.45		0	0	0.8742	0.8095	0.0474	0.1986	0.0936	0.2022	0.9406	1	0.0624	0.5777	0	0	2.0876e-05	8.0913e-05	1e-14
	338			cysteine	LC/MS pos early	1868	C00097	HMDB00574	5862					0.65	1	1.25		0.96	2.95	9.31	0.09	3.08	9.72	0.09	3.16	0.27	0.85		5.31	0.15	0.78		0	0	0.1737	0.6978	0.008	0.1473	0.0029	0.0466	0.9646	1	0.094	0.6674	0	0	0.9494	0.7171	1.3012e-07
	340			S-methylcysteine	LC/MS pos early	39592		HMDB02108	24417					0.93	1.1	1.06		0.47	0.72	0.31	1.67	1.54	0.67	0.78	0.44	1.19	0.52		0.52	1.04	0.54		3.3e-14	2e-15	0.549	0.7197	0.3493	0.4236	0.4	0.4661	0.33	1	0.3677	0.9431	1.37e-10	1.09e-12	2.4176e-07	1.4056e-06	0.0031
	344			cystine	LC/MS pos early	56	C00491	HMDB00192	67678					3.33	0.76	0.74		0.82	0.63	0.9	0.37	0.77	1.09	0.31	1.41	0.24	0.33		0.32	1.07	0.35		0.001	1.8476e-05	0.6397	0.74	0.0137	0.1868	0.0088	0.0712	0.5644	1	0.1781	0.8294	0.0001	4.4e-07	0.5153	0.4863	0.1547
	348			cysteine sulfinic acid	LC/MS pos early	37443	C00606	HMDB00996	109					1.21	1.01	0.99		0.45	0.86	1.96	0.86	1.92	4.4	0.39	2.29	0.74	1.7		1.91	0.91	1.74		1.5854e-07	3.6662e-09	0.3806	0.6978	0.5417	0.517	0.1632	0.2757	0.9265	1	0.9831	1	8.66e-06	4.23e-08	0.0026	0.0054	0.4894
	349			hypotaurine	LC/MS pos early	590	C00519	HMDB00965	107812					0.88	1.03	1.14		0.68	0.95	0.92	2.22	1.4	1.36	1.5	0.97	2.11	2.04		1.13	1.62	1.84		2.14e-13	1e-14	0.8524	0.8091	0.0713	0.2179	0.0942	0.2022	0.6647	1	0.117	0.7176	1.34e-09	9.63e-12	0.0004	0.001	0.5591
	350			taurine	LC/MS pos early	2125	C00245	HMDB00251	1123					0.91	0.96	1.03		0.86	0.85	0.86	1.6	0.99	1	1.37	1.01	1.36	1.37		1.07	1.2	1.28		2.16e-13	1e-14	0.099	0.6978	0.0655	0.2127	0.0109	0.0759	0.3273	1	0.4609	0.9577	1.67e-10	1.31e-12	0.002	0.0043	0.0005
	351			N-acetyltaurine	LC/MS neg	48187			159864					0.98	0.95	0.94		0.54	0.23	0.16	16.69	0.43	0.29	8.95	0.68	3.84	2.6		0.66	3.99	2.62		0	0	0.4028	0.7041	0.9578	0.6817	0.7861	0.6871	0.4959	1	0.6166	0.9955	0	0	4.7395e-06	2.2044e-05	3.2e-14
	353			taurocyamine	LC/MS pos early	35117	C01959	HMDB03584	68340					0.85	0.91	1		3.18	10.8	10.92	1	3.39	3.43	3.18	1.01	10.8	10.92		1.09	9.13	9.97		0	0	0.1088	0.6978	0.4162	0.4591	0.0661	0.1738	0.347	1	1	1	1.3e-13	2e-15	0.0006	0.0014	1.9159e-11
	355			3-sulfo-L-alanine	LC/MS polar	47089	C00506	HMDB02757	72886					1.22	0.94	0.84		0.42	0.19	0.25	4.6	0.46	0.6	1.94	1.31	0.88	1.15		1.01	1.29	1.3		0.3375	0.0052	0.9589	0.8163	0.3613	0.4294	0.2762	0.3799	0.7544	1	0.3844	0.9577	2.44e-08	1.56e-10	0.0003	0.0008	5.3348e-09
	356			cyano-alanine	LC/MS polar	35660	C02512		13538					1	1.05	1.01		1	1	4.27	0.48	1	4.27	0.48	4.27	0.48	2.07		4.48	0.48	2.14		0	0	0.6287	0.74	0.9404	0.6805	1	0.7515	0.7083	1	0.6428	0.9955	6.42e-13	7e-15	1	0.7171	1
	357		Urea cycle; Arginine and Proline Metabolism	arginine	LC/MS pos early	1638	C00062	HMDB00517	232					0.88	1.01	1.03		1.03	1.61	2.32	0.53	1.56	2.26	0.54	1.45	0.85	1.22		1.66	0.72	1.2		1.0862e-11	4.1e-13	0.4714	0.7062	0.123	0.2776	0.0406	0.1398	0.8258	1	0.525	0.9577	7.89e-12	7.4e-14	0.644	0.5729	8.0936e-07
	358			argininosuccinate	LC/MS pos early	15497	C03406	HMDB00052	828					0.77	1.01	1.07		1.1	1.83	3.02	0.74	1.67	2.76	0.81	1.65	1.35	2.22		2.17	0.97	2.1		1.989e-12	8.1e-14	0.3713	0.6978	0.0498	0.1986	0.0141	0.0831	0.8406	1	0.4242	0.9577	3.69e-09	2.53e-11	0.4152	0.412	2.8312e-05
	359			urea	LC/MS pos early	1670	C00086	HMDB00294	1176					0.97	1.04	1.2		0.39	0.42	0.53	2.37	1.07	1.35	0.93	1.27	1	1.26		1.36	0.81	1.1		6.956e-06	1.4148e-07	0.1401	0.6978	0.0883	0.2356	0.5456	0.5657	0.529	1	0.0138	0.3491	8.04e-11	6.6e-13	4.9161e-11	9.4152e-10	6.271e-11
	361			ornithine	LC/MS pos early	1493	C00077	HMDB03374	6262					0.87	1.05	1.11		1.07	0.94	1.4	1.37	0.88	1.3	1.46	1.48	1.29	1.91		1.78	1.01	1.8		4e-14	2e-15	0.8985	0.8095	0.0383	0.1986	0.0457	0.1514	0.4362	1	0.1411	0.7763	1.8e-06	9.46e-09	0.4107	0.4102	0.6827
	364			2-oxoarginine	LC/MS pos early	55072	C03771	HMDB04225	558					0.84	0.98	0.97		1.06	1.08	1.77	0.79	1.03	1.68	0.83	1.64	0.85	1.4		1.91	0.74	1.41		1.3461e-05	2.6593e-07	0.4427	0.7062	0.7802	0.6316	0.32	0.412	0.7743	1	0.9626	1	0.0029	1.17e-05	0.7157	0.6068	0.7917
	365			citrulline	LC/MS pos early	2132	C00327	HMDB00904	9750					1.03	1.08	1.11		0.93	0.85	0.68	3.21	0.91	0.73	2.98	0.8	2.72	2.17		0.84	2.51	2.1		0	0	0.0115	0.6978	0.4411	0.4758	0.5681	0.5777	0.1094	1	0.0218	0.3744	0	0	0.1847	0.2211	0.0025
	366			homoarginine	LC/MS pos early	22137	C01924	HMDB00670	9085					0.87	1.04	1.25		0.33	0.44	0.3	11.63	1.34	0.91	3.8	0.68	5.08	3.46		0.81	3.56	2.89		0	0	0.4295	0.7062	0.0495	0.1986	0.1956	0.3148	0.6875	1	0.0275	0.3744	0	0	4.2861e-09	3.8763e-08	2.5392e-07
	367			homocitrulline	LC/MS pos early	22138	C02427	HMDB00679	65072					0.97	1.14	0.96		0.23	0.63	0.65	1.94	2.77	2.89	0.44	1.04	1.21	1.27		1.23	1.22	1.51		0.0179	0.0003	0.5879	0.739	0.7718	0.6311	0.9189	0.7371	0.382	1	0.8702	1	4.73e-06	2.37e-08	2.1957e-07	1.3488e-06	0.0196
	368			proline	LC/MS pos early	1898	C00148	HMDB00162	145742					0.87	1.01	1		0.79	0.75	0.82	1.71	0.94	1.03	1.35	1.09	1.27	1.39		1.26	1.11	1.4		5.6402e-10	1.6932e-11	0.1396	0.6978	0.1056	0.2619	0.0117	0.0797	0.9294	1	0.9613	1	9.08e-08	5.46e-10	0.0017	0.0038	5.7699e-05
	371			dimethylarginine (SDMA + ADMA)	LC/MS pos early	36808	C03626	HMDB01539	123831					0.87	0.99	1.04		0.53	0.38	0.45	3.89	0.73	0.86	2.06	1.18	1.49	1.76		1.34	1.26	1.69		3.8639e-10	1.1806e-11	0.4282	0.7062	0.3611	0.4294	0.1125	0.2287	0.9551	1	0.7691	1	4.69e-13	5e-15	4.7147e-07	2.5164e-06	3.5398e-11
	372			N-acetylarginine	LC/MS pos early	33953	C02562	HMDB04620	67427					0.88	1.05	1.11		1.66	6.48	13.39	0.12	3.91	8.07	0.2	2.07	0.77	1.6		2.46	0.62	1.52		1.15e-13	6e-15	0.8557	0.8095	0.1412	0.2936	0.1405	0.2563	0.5714	1	0.2182	0.8513	0	0	6.432e-05	0.0002	0
	373			N-acetylcitrulline	LC/MS pos early	48434	C15532	HMDB00856	656979					0.84	1.32	1.06		1	2.88	1.83	1	2.88	1.83	1	0.64	2.88	1.83		1	2.29	2.29		9.8469e-11	3.215e-12	0.5028	0.7062	0.0304	0.1949	0.1295	0.2438	0.023	1	0.7286	0.9963	9.01e-10	6.59e-12	1	0.7171	5.157e-09
	375			N-delta-acetylornithine	LC/MS pos early	43249			9920500					1.06	1.24	1.02		0.07	0.23	1.52	0.94	3.26	21.5	0.07	6.6	0.22	1.44		7.66	0.23	1.74		0	0	0.1302	0.6978	0.507	0.499	0.5883	0.5851	0.0735	1	0.7715	1	0	0	2.3e-14	1.239e-12	1.9437e-09
	380			trans-4-hydroxyproline	LC/MS pos early	32306	C01157	HMDB00725	5810					0.9	1	1.02		0.89	0.61	0.25	5.15	0.69	0.28	4.57	0.41	3.13	1.3		0.46	2.77	1.27		0	0	0.4601	0.7062	0.2438	0.3666	0.0776	0.1813	0.9246	1	0.6709	0.9963	0	0	0.0591	0.083	2.2089e-09
	387			N-monomethylarginine	LC/MS pos early	43586	C03884	HMDB29416	132862					0.81	0.96	1.02		0.58	1.13	2.81	0.38	1.94	4.85	0.22	2.5	0.43	1.08		2.96	0.34	1.01		0	0	0.1896	0.6978	0.1501	0.2936	0.0262	0.1119	0.6534	1	0.6516	0.9955	7.41e-11	6.14e-13	0.0048	0.0092	0.2573
	388			argininate	LC/MS pos early	57461		HMDB03148	160437					0.84	1.03	1.13		1.08	1.57	5.58	0.15	1.46	5.16	0.16	3.55	0.24	0.84		4.31	0.18	0.76		0	0	0.9256	0.8115	0.3001	0.3964	0.2554	0.3567	0.7839	1	0.3042	0.9286	6.2e-14	1e-15	0.5368	0.4984	0.0073
	391		Creatine Metabolism	guanidinoacetate	LC/MS pos early	43802	C00581	HMDB00128	763					0.98	0.96	1.13		1.05	0.36	0.41	3.09	0.34	0.39	3.25	1.13	1.12	1.26		1.1	0.98	1.07		0.0013	2.255e-05	0.4721	0.7062	0.1099	0.2642	0.7781	0.686	0.5294	1	0.036	0.4166	6e-15	0	0.6555	0.5768	2.865e-12
	392			creatine	LC/MS pos early	27718	C00300	HMDB00064	586					0.94	1	1.02		1.06	1.29	1.53	0.69	1.22	1.45	0.73	1.18	0.89	1.05		1.27	0.82	1.04		3.3e-14	2e-15	0.3057	0.6978	0.0432	0.1986	0.01	0.0758	0.8365	1	0.4812	0.9577	7.3e-14	1e-15	0.1056	0.1381	7.788e-09
	393			creatinine	LC/MS pos early	513	C00791	HMDB00562	588					0.9	1.01	1.01		0.97	1.27	1.81	0.63	1.31	1.87	0.61	1.43	0.8	1.14		1.6	0.71	1.13		7.758e-12	3.01e-13	0.4089	0.7048	0.2343	0.3638	0.0657	0.1738	0.8899	1	0.7571	1	8.79e-11	7.15e-13	0.6764	0.5888	0.0007
	399		Polyamine Metabolism	putrescine	LC/MS pos early	1408	C00134	HMDB01414	1045					0.89	1.08	0.92		0.63	0.15	0.13	16.85	0.24	0.21	10.54	0.88	2.52	2.21		1.07	2.44	2.6		0	0	0.3597	0.6978	0.1712	0.308	0.1192	0.2351	0.3239	1	0.3188	0.9338	0	0	2.4283e-05	9.3012e-05	0
	402			spermidine	LC/MS pos early	485	C00315	HMDB01257	1102					0.74	0.99	1.28		0.99	0.77	0.98	2.77	0.78	0.99	2.74	1.28	2.14	2.72		1.7	1.24	2.11		2.325e-12	9.5e-14	0.9244	0.8115	0.0036	0.1309	0.0126	0.0809	0.9561	1	0.0164	0.3549	8.5e-09	5.62e-11	0.998	0.7171	0.0618
	407			spermine	LC/MS pos late	603	C00750	HMDB01256	1103					1.16	1.09	1.05		1.43	2.37	3.39	0.62	1.65	2.37	0.88	1.43	1.46	2.09		1.34	1.61	2.16		5.0969e-06	1.0586e-07	0.3693	0.6978	0.9768	0.6871	0.5125	0.5447	0.5829	1	0.7216	0.9963	5.05e-06	2.52e-08	0.0708	0.0977	7.0525e-05
	410			5-methylthioadenosine (MTA)	LC/MS pos early	1419	C00170	HMDB01173	439176					0.8	1.04	1.12		0.87	0.99	1.13	1.83	1.14	1.29	1.6	1.14	1.82	2.07		1.48	1.3	1.92		3.06e-12	1.24e-13	0.7027	0.7587	0.0279	0.1868	0.0191	0.1045	0.6744	1	0.1807	0.8294	5.02e-07	2.8e-09	0.3343	0.3489	0.9634
	411			N-acetylputrescine	LC/MS pos early	37496	C02714	HMDB02064	122356					0.84	1.03	1		0.64	0.18	0.14	19.5	0.28	0.22	12.47	0.79	3.53	2.79		0.97	2.95	2.86		0	0	0.302	0.6978	0.3065	0.3991	0.0731	0.177	0.7853	1	0.8098	1	0	0	0.0001	0.0003	0
	417			(N(1) + N(8))-acetylspermidine	LC/MS pos early	57814								0.95	1.04	1.06		0.76	1.07	1.04	1.06	1.4	1.36	0.81	0.97	1.13	1.1		1.07	1.01	1.08		0.4317	0.0066	0.993	0.825	0.7986	0.6367	0.5827	0.5847	0.7877	1	0.7904	1	0.0614	0.0002	0.0557	0.0789	0.4645
	418		Guanidino and Acetamido Metabolism	1-methylguanidine	LC/MS pos early	48114	C02294	HMDB01522	10111					0.99	1	1.12		0.93	0.62	1.57	1.08	0.67	1.7	1	2.52	0.67	1.69		2.54	0.59	1.51		4.5254e-11	1.533e-12	0.554	0.7197	0.8077	0.6397	0.8622	0.7245	0.9924	1	0.3903	0.9577	1.68e-05	7.98e-08	0.7146	0.6068	0.0029
	419			4-guanidinobutanoate	LC/MS pos early	15681	C01035	HMDB03464	500					0.89	1.02	1.11		7.08	22.33	22.04	0.12	3.15	3.11	0.86	0.99	2.7	2.66		1.14	2.16	2.45		0	0	0.8492	0.8081	0.1031	0.2577	0.1326	0.2459	0.7525	1	0.1292	0.7427	0	0	1e-15	1.43e-13	0
	422		Glutathione Metabolism	glutathione, reduced (GSH)	LC/MS pos early	2127	C00051	HMDB00125	124886					0.83	1.04	1.09		1.17	2.21	2.73	0.7	1.89	2.34	0.82	1.24	1.55	1.91		1.92	0.8	1.54		8.1475e-07	1.7895e-08	0.4127	0.7051	0.0047	0.1309	0.0495	0.1564	0.6659	1	0.2998	0.9286	2.5e-07	1.45e-09	0.3099	0.3287	1.119e-05
	423			glutathione, oxidized (GSSG)	LC/MS pos early	27727	C00127	HMDB03337	65359					0.62	1.04	1.14		0.78	0.94	1.3	1.1	1.21	1.68	0.86	1.39	1.04	1.44		1.78	0.72	1.28		8.6014e-09	2.2064e-10	0.223	0.6978	0.0066	0.1309	0.0012	0.0463	0.7789	1	0.4197	0.9577	5.18e-05	2.38e-07	0.0192	0.0315	0.6242
	425			cysteine-glutathione disulfide	LC/MS pos early	35159		HMDB00656	4247235					1.14	0.95	0.95		0.44	0.52	1.39	0.46	1.19	3.14	0.2	2.65	0.24	0.63		2.2	0.29	0.63		0	0	0.8075	0.7988	0.2373	0.3663	0.1292	0.2438	0.5333	1	0.6211	0.9955	7.5e-14	1e-15	7.5066e-07	3.8188e-06	5.9082e-06
	426			S-methylglutathione	LC/MS pos early	33944	C11347		3605667					0.9	1.08	1.21		0.46	0.39	0.55	2.84	0.84	1.2	1.31	1.43	1.1	1.57		1.71	0.82	1.4		1.3624e-05	2.6837e-07	0.3924	0.7025	0.1588	0.3032	0.3445	0.4264	0.5246	1	0.0779	0.6348	1.83e-06	9.59e-09	5.3738e-05	0.0002	1.4435e-06
	427			S-lactoylglutathione	LC/MS pos early	15731	C03451	HMDB01066	440018					0.44	1.14	1.03		1	9.38	8.61	0.1	9.38	8.61	0.1	0.92	0.93	0.86		2.38	0.4	0.95		0.0006	1.175e-05	0.1722	0.6978	0.0492	0.1986	0.0065	0.0666	0.7185	1	0.9099	1	5.44e-12	5.2e-14	1	0.7171	5.1763e-09
	428			cysteinylglycine	LC/MS pos early	35637	C01419	HMDB00078	439498					1.25	0.98	1.13		0.85	0.81	3.59	0.16	0.96	4.24	0.13	4.42	0.13	0.56		3.47	0.14	0.49		0	0	0.5193	0.7098	0.4594	0.4827	0.345	0.4264	0.5193	1	0.417	0.9577	0	0	0.4199	0.4143	0.2397
	429			cysteinylglycine disulfide	LC/MS pos early	62103		HMDB00709						5.02	1.01	0.58		0.24	0.07	0.05	2.68	0.28	0.2	0.65	0.72	0.18	0.13		0.14	1.57	0.23		5.5829e-06	1.1491e-07	0.2834	0.6978	0.0021	0.1309	0.001	0.0463	0.9729	1	0.0918	0.6674	1.66e-10	1.31e-12	4.4042e-05	0.0002	3.461e-10
	431			5-oxoproline	LC/MS neg	1494	C01879	HMDB00267	7405					0.77	0.99	1.11		0.74	1.64	4.55	0.28	2.22	6.17	0.21	2.78	0.46	1.29		3.47	0.35	1.22		0	0	0.7547	0.7758	0.0833	0.2302	0.0017	0.0463	0.9803	1	0.2119	0.8508	6e-15	0	0.0227	0.0364	0.0002
	434			2-hydroxybutyrate/2-hydroxyisobutyrate	LC/MS polar	52281								0.88	0.99	1.01		0.94	1.46	0.74	2.19	1.56	0.78	2.05	0.5	3.2	1.61		0.57	2.78	1.58		0	0	0.2667	0.6978	0.4516	0.4827	0.1011	0.2103	0.7971	1	0.9902	1	2e-14	0	0.4085	0.4102	2.0631e-05
	436			ophthalmate	LC/MS pos early	34592		HMDB05765	7018721					1	1.08	1.28		0.29	0.4	0.19	6.95	1.37	0.66	2.04	0.48	2.79	1.35		0.52	2.17	1.13		3.55e-13	1.6e-14	0.1349	0.6978	0.271	0.3827	0.9245	0.7372	0.5691	1	0.0367	0.4166	7e-15	0	1.0622e-10	1.7292e-09	1.0606e-08
	439			4-hydroxy-nonenal-glutathione	LC/MS neg	48487								1.09	0.99	0.9		1	1.56	1.07	1.35	1.56	1.07	1.35	0.68	2.11	1.44		0.62	2.55	1.59		1.0739e-09	3.0635e-11	0.9062	0.8095	0.4235	0.4631	0.2882	0.387	0.924	1	0.4425	0.9577	0.0015	6.22e-06	0.94	0.7171	0.0195
	445	Peptide	Gamma-glutamyl Amino Acid	gamma-glutamylglutamate	LC/MS pos early	36738	C05282	HMDB11737	92865					0.8	0.93	1.01		0.98	1.76	5.58	0.19	1.8	5.69	0.19	3.16	0.34	1.07		3.68	0.27	0.99		0	0	0.1407	0.6978	0.3935	0.4517	0.0633	0.1738	0.479	1	0.9823	1	0	0	0.8911	0.6979	3.4832e-05
	446			gamma-glutamylglutamine	LC/MS pos early	2730	C05283	HMDB11738	150914					0.78	1.02	1.18		0.48	0.25	1.01	0.81	0.52	2.12	0.39	4.1	0.2	0.82		5.33	0.13	0.71		0	0	0.6536	0.74	0.0027	0.1309	0.0036	0.0473	0.8345	1	0.041	0.4427	2.09e-13	3e-15	5.8269e-06	2.672e-05	2.3006e-11
	447			gamma-glutamylglycine	LC/MS pos early	33949		HMDB11667	165527					0.8	1.04	1.14		0.24	0.11	2.08	0.44	0.46	8.65	0.1	18.98	0.05	0.91		24.64	0.03	0.83		0	0	0.9852	0.825	0.1234	0.2776	0.1149	0.2307	0.7367	1	0.1988	0.8294	0	0	2.1375e-07	1.3383e-06	1.2062e-11
	448			gamma-glutamylhistidine	LC/MS pos early	18245			7017195					0.91	1.04	1.47		0.94	1.03	3.56	0.64	1.1	3.8	0.6	3.45	0.66	2.27		3.95	0.41	1.61		0	0	0.081	0.6978	0.0137	0.1868	0.4554	0.502	0.7141	1	0.0013	0.1159	1.45e-11	1.29e-13	0.6538	0.5768	0.8147
	450			gamma-glutamylleucine	LC/MS pos early	18369		HMDB11171	151023					0.72	0.97	1.07		0.37	0.35	1.26	1.1	0.94	3.39	0.41	3.59	0.39	1.39		4.86	0.26	1.26		0	0	0.3399	0.6978	0.1867	0.3178	0.0492	0.1564	0.8653	1	0.5988	0.9955	6.9e-09	4.6e-11	1.472e-05	5.9167e-05	1.2314e-06
	451			gamma-glutamyl-alpha-lysine	LC/MS pos early	55015			65254					0.9	0.97	1.27		0.66	0.73	3.21	0.62	1.11	4.86	0.41	4.37	0.45	1.99		4.69	0.32	1.51		0	0	0.3862	0.6978	0.0558	0.2036	0.4618	0.5034	0.7903	1	0.0159	0.3549	1.48e-09	1.06e-11	0.0955	0.128	0.186
	453			gamma-glutamylmethionine	LC/MS pos early	44872		HMDB29155	7009567					1	1.22	1.24		0.39	0.26	0.59	1.33	0.67	1.51	0.52	2.26	0.35	0.79		2.76	0.28	0.77		1.04e-13	5e-15	0.0498	0.6978	0.3668	0.4311	1	0.7515	0.0926	1	0.0821	0.6387	1.34e-06	7.14e-09	0.0001	0.0004	3.0158e-07
	454			gamma-glutamylphenylalanine	LC/MS pos early	33422		HMDB00594	111299					1	1.01	1.03		0.92	0.98	3.84	0.37	1.07	4.19	0.34	3.91	0.37	1.43		3.98	0.35	1.41		0	0	0.8899	0.8095	0.9775	0.6871	0.9446	0.7462	0.9372	1	0.8177	1	2.4e-13	3e-15	0.5598	0.5105	0.9214
	455			gamma-glutamylthreonine	LC/MS pos early	33364		HMDB29159	76078708					0.79	0.93	1.06		0.88	1.23	1.92	0.67	1.4	2.19	0.59	1.56	0.83	1.29		1.83	0.62	1.14		0.001	1.6968e-05	0.4273	0.7062	0.4803	0.4896	0.225	0.3412	0.5337	1	0.6397	0.9955	0.0024	9.78e-06	0.5927	0.5345	0.2669
	457			gamma-glutamyltyrosine	LC/MS neg	2734		HMDB11741	94340					1	1.08	0.83		1	1	2.63	0.45	1	2.63	0.45	2.63	0.45	1.19		2.85	0.54	1.54		1.0464e-08	2.6544e-10	0.9671	0.8187	0.4079	0.4591	1	0.7515	0.3265	1	0.3623	0.9359	1.24e-05	6.01e-08	1	0.7171	1
	458			gamma-glutamylvaline	LC/MS pos early	43829		HMDB11172	7015683					0.77	1.05	1.21		0.35	0.27	0.73	2.25	0.78	2.1	0.79	2.69	0.62	1.66		3.68	0.39	1.45		1.0571e-11	4.01e-13	0.9167	0.8115	0.1375	0.2932	0.1052	0.2161	0.7489	1	0.2548	0.8797	1.83e-07	1.07e-09	8.5071e-06	3.7942e-05	6.0499e-08
	461			gamma-glutamyl-2-aminobutyrate	LC/MS pos early	37092								0.7	1.03	0.89		0.35	0.23	0.26	6.9	0.65	0.73	2.43	1.13	1.57	1.77		1.65	1.25	2.05		0.002	3.3974e-05	0.3099	0.6978	0.5512	0.5244	0.1586	0.2732	0.927	1	0.6652	0.9963	5.94e-08	3.68e-10	0.0002	0.0006	1.7726e-07
	469		Dipeptide	alanylglycine	LC/MS pos early	37075		HMDB06899	79094					0.78	1.21	1.02		0.64	0.79	1.15	0.91	1.23	1.78	0.58	1.45	0.72	1.04		2.26	0.55	1.23		0.0018	3.0685e-05	0.8838	0.8095	0.3012	0.3964	0.2056	0.3217	0.3696	1	0.9008	1	0.2417	0.0009	0.2632	0.2896	0.677
	477			alanylserine	LC/MS pos early	37079		HMDB28696	96821					1	1.12	1.49		1.14	0.45	1.44	1.32	0.4	1.26	1.51	3.16	0.6	1.89		3.55	0.4	1.43		1.7985e-05	3.4927e-07	0.3585	0.6978	0.7944	0.6366	1	0.7515	0.5	1	0.3588	0.9359	0.006	2.38e-05	0.6277	0.5615	0.0144
	509			asparaginylalanine	LC/MS pos early	54731		HMDB28724						0.72	0.95	1.05		0.83	0.76	0.66	2.3	0.91	0.8	1.9	0.87	1.74	1.52		1.16	1.19	1.38		0.0041	6.9311e-05	0.1766	0.6978	0.0949	0.243	0.0138	0.0831	0.8296	1	0.6772	0.9963	9.36e-05	4.25e-07	0.2393	0.2715	0.0794
	516			asparaginylglutamate	LC/MS pos early	43022								0.8	0.98	1.36		0.88	1.7	1.31	1.57	1.92	1.48	1.39	0.77	2.67	2.06		0.95	1.57	1.48		1.7828e-08	4.3616e-10	0.8699	0.8095	0.021	0.1868	0.0742	0.1772	0.8704	1	0.028	0.3744	1.86e-05	8.78e-08	0.8159	0.6592	0.0021
	520			aspartylaspartate	LC/MS pos early	40671			332965					0.78	1.01	1.06		0.92	1.96	3	0.43	2.13	3.24	0.4	1.53	0.84	1.28		1.97	0.62	1.23		1.5892e-07	3.6662e-09	0.3305	0.6978	0.1512	0.2936	0.0358	0.1274	0.9822	1	0.6558	0.9955	6.17e-10	4.57e-12	0.7005	0.605	1.0112e-05
	521			aspartylglycine	LC/MS pos early	41519			302429;5247119					0.73	0.84	1.03		0.73	1.29	1.36	1.35	1.76	1.85	0.99	1.05	1.74	1.83		1.22	1.23	1.5		2.2414e-05	4.3283e-07	0.0779	0.6978	0.2622	0.377	0.0395	0.1377	0.2334	1	0.839	1	0.0003	1.3e-06	0.1107	0.1433	0.0999
	576			glutaminylglutamate	LC/MS pos early	43025								0.77	1.03	1		0.9	1.15	0.91	1.58	1.27	1	1.42	0.79	1.81	1.43		1.05	1.39	1.46		4.6241e-07	1.0423e-08	0.2657	0.6978	0.164	0.305	0.0314	0.1233	0.7944	1	0.9858	1	0.0005	2.12e-06	0.476	0.4585	0.3693
	592			glycylalanine	LC/MS pos early	41463			98153					0.81	1.03	0.78		0.89	1.4	1.64	0.83	1.57	1.84	0.74	1.17	1.16	1.36		1.5	1.2	1.8		0.0015	2.5977e-05	0.3576	0.6978	0.7637	0.628	0.3849	0.4559	0.9511	1	0.4311	0.9577	0.0563	0.0002	0.4222	0.4153	0.2328
	594			glycylaspartate	LC/MS polar	41366		HMDB28837	273261					0.84	0.94	1.08		0.73	0.79	1.33	1.31	1.08	1.82	0.96	1.69	1.03	1.75		1.91	0.8	1.52		2.0779e-10	6.523e-12	0.3287	0.6978	0.135	0.2912	0.0515	0.1568	0.5545	1	0.3762	0.9577	3.37e-06	1.71e-08	0.0099	0.0178	0.0315
	596			glycylglutamate	LC/MS polar	34403		HMDB28840	99278					0.78	0.98	1.03		0.68	0.8	0.97	1.75	1.17	1.43	1.19	1.22	1.39	1.7		1.52	1.06	1.61		7.9084e-10	2.3037e-11	0.096	0.6978	0.0455	0.1986	0.004	0.0491	0.7864	1	0.7027	0.9963	3.82e-06	1.92e-08	0.001	0.0024	0.0296
	599			glycylglycine	LC/MS pos early	21029	C02037	HMDB11733	11163					0.8	1.06	0.99		0.89	0.77	0.81	1.54	0.86	0.9	1.38	1.04	1.19	1.24		1.39	0.95	1.32		0.002	3.4966e-05	0.2793	0.6978	0.0993	0.2521	0.0211	0.1058	0.5783	1	0.9592	1	0.0024	9.78e-06	0.3083	0.3287	0.0215
	600			glycylhistidine	LC/MS pos early	41367		HMDB28843	417360					0.74	0.87	1.12		1.07	1.88	0.91	1.64	1.75	0.85	1.76	0.49	3.08	1.49		0.57	2.02	1.16		1.7836e-05	3.4735e-07	0.6279	0.74	0.5063	0.499	0.232	0.3426	0.9876	1	0.7027	0.9963	0.0025	1.02e-05	0.8138	0.6591	0.0287
	607			glycylserine	LC/MS polar	33940		HMDB28850	73086					0.73	0.97	0.99		0.82	1.02	1.11	1.14	1.24	1.34	0.94	1.08	1.17	1.26		1.43	0.87	1.24		0.0017	2.9037e-05	0.0563	0.6978	0.0278	0.1868	0.0016	0.0463	0.7962	1	0.7951	1	0.0706	0.0003	0.1665	0.2045	0.7457
	614			histidylglutamate	LC/MS pos early	41963		HMDB28884	9838731					0.64	1	1.03		1.31	1.4	1.93	1.06	1.07	1.48	1.39	1.38	1.49	2.05		2.15	0.93	1.99		2.763e-08	6.6184e-10	0.1242	0.6978	0.0144	0.1868	0.0016	0.0463	0.9867	1	0.5114	0.9577	0.0011	4.61e-06	0.0821	0.1105	0.0332
	615			histidylglycine	LC/MS pos early	41368		HMDB28885	351662					0.96	0.94	1.19		0.59	0.59	2.48	0.53	0.99	4.19	0.31	4.23	0.31	1.32		4.14	0.25	1.05		1.6019e-11	5.89e-13	0.5687	0.7296	0.6107	0.5591	0.9865	0.7515	0.8717	1	0.261	0.8797	6.47e-06	3.2e-08	0.1005	0.1341	0.0459
	660			leucylproline	LC/MS pos early	35663		HMDB11175	80817					0.83	0.83	0.93		0.7	1.16	2.28	0.58	1.65	3.26	0.4	1.97	0.67	1.32		1.98	0.6	1.18		3.6127e-05	6.899e-07	0.2315	0.6978	0.8381	0.6511	0.3352	0.4189	0.367	1	0.829	1	0.0001	4.4e-07	0.307	0.3287	0.4134
	661			leucylserine	LC/MS pos early	40048			3621685					0.89	1.13	1.34		0.74	0.93	3.72	0.3	1.25	5.01	0.22	4	0.28	1.11		5.07	0.18	0.93		5.6893e-11	1.88e-12	0.1956	0.6978	0.339	0.4171	0.6847	0.6435	0.2999	1	0.1094	0.7176	1.54e-05	7.35e-08	0.5373	0.4984	0.9047
	685			methionylaspartate	LC/MS pos early	40687								0.8	1.1	1.14		1	1.32	6.93	0.14	1.32	6.93	0.14	5.24	0.19	0.99		7.2	0.13	0.95		0	0	0.7575	0.7758	0.0806	0.2258	0.0953	0.2033	0.3266	1	0.2168	0.8513	0	0	1	0.7171	0.0556
	717			prolylalanine	LC/MS pos early	40705		HMDB29010	418041					0.72	1.09	1.16		1.44	1.74	1.83	1	1.21	1.27	1.44	1.05	1.74	1.84		1.6	1.08	1.72		8.4742e-10	2.4581e-11	0.6703	0.7499	0.0008	0.0892	0.0009	0.0463	0.2929	1	0.0789	0.6348	5.08e-06	2.53e-08	0.0065	0.0123	6.565e-05
	721			prolylglutamate	LC/MS pos early	41381			3563697					0.82	1.06	1.06		1.06	1.23	1.67	1.08	1.16	1.57	1.15	1.35	1.33	1.8		1.74	1.03	1.79		1.247e-11	4.66e-13	0.5986	0.74	0.0562	0.2036	0.0246	0.1101	0.4824	1	0.478	0.9577	1.23e-06	6.59e-09	0.4724	0.4564	0.0282
	723			prolylglycine	LC/MS pos early	40703		HMDB11178	6426709					0.78	1.03	1.12		1.58	2.19	2.56	0.82	1.38	1.62	1.29	1.17	1.79	2.09		1.55	1.24	1.93		1.5494e-10	4.909e-12	0.6376	0.74	0.0421	0.1986	0.0226	0.1101	0.6769	1	0.262	0.8797	3.08e-07	1.75e-09	0.0026	0.0054	2.6277e-06
	729			prolylproline	LC/MS pos early	40731		HMDB11180	11622593					0.77	1.03	1.05		0.91	1.63	1.66	1.15	1.79	1.83	1.05	1.02	1.88	1.92		1.37	1.38	1.89		1.0968e-08	2.7722e-10	0.3461	0.6978	0.1197	0.2776	0.0284	0.1152	0.7395	1	0.7692	1	1.63e-06	8.62e-09	0.5233	0.4896	0.0005
	735			serylglycine	LC/MS polar	42577		HMDB29039	136488					0.77	1	1.01		1.08	2.15	2.15	0.55	1.99	1.99	0.59	1	1.17	1.17		1.31	0.89	1.17		0.0145	0.0002	0.0777	0.6978	0.0268	0.1868	0.0019	0.0463	0.9818	1	0.8506	1	4.07e-10	3.06e-12	0.4163	0.412	3.8372e-09
	740			serylglutamate	LC/MS pos early	42041			3613616					0.77	1.02	1.16		0.99	1.22	1.29	1.15	1.24	1.31	1.13	1.06	1.4	1.49		1.41	0.93	1.31		0.0008	1.3995e-05	0.6459	0.74	0.0245	0.1868	0.0174	0.097	0.8329	1	0.1478	0.7763	0.0088	3.47e-05	0.985	0.7171	0.1119
	747			serylserine	LC/MS pos early	42053			138784					0.59	0.91	1.12		0.91	1.44	1.37	1.09	1.58	1.5	0.99	0.95	1.56	1.49		1.47	0.82	1.21		0.0561	0.0009	0.0812	0.6978	0.0318	0.1965	0.003	0.047	0.5794	1	0.5319	0.962	0.0231	9.02e-05	0.6474	0.5744	0.0501
	757			threonylisoleucine	LC/MS pos early	42972								0.83	0.93	1.07		1	1.66	6.62	0.09	1.66	6.62	0.09	3.98	0.15	0.61		4.46	0.12	0.53		0	0	0.2682	0.6978	0.1686	0.3052	0.0544	0.1644	0.485	1	0.4606	0.9577	0	0	1	0.7171	7.2392e-06
	909	Carbohydrate	Glycolysis, Gluconeogenesis, and Pyruvate Metabolism	1,5-anhydroglucitol (1,5-AG)	LC/MS neg	20675	C07326	HMDB02712	64960					0.79	0.99	0.88		1.09	2.06	1.1	1.05	1.9	1.02	1.15	0.54	2.18	1.16		0.67	1.97	1.32		8.811e-12	3.4e-13	0.0403	0.6978	0.3276	0.4111	0.0251	0.1101	0.8457	1	0.2573	0.8797	4.36e-07	2.44e-09	0.4387	0.4264	1.049e-06
	912			glucose	LC/MS polar	20488	C00031	HMDB00122	79025					0.89	0.9	0.83		0.69	1.04	1.13	1.86	1.5	1.62	1.29	1.08	1.94	2.1		1.1	2.07	2.27		3.2715e-08	7.8092e-10	0.1917	0.6978	0.89	0.6722	0.5323	0.5567	0.6086	1	0.2547	0.8797	0.0001	4.4e-07	0.0523	0.0747	0.9492
	913			glucose 6-phosphate	LC/MS polar	31260	C00668	HMDB01401	5958					0.72	0.84	0.96		1.36	8.51	9.13	0.21	6.27	6.73	0.29	1.07	1.82	1.96		1.25	1.38	1.72		0.0001	2.1218e-06	0.1348	0.6978	0.6963	0.6042	0.13	0.2438	0.4689	1	0.7145	0.9963	3.78e-12	3.7e-14	0.14	0.1753	3.8597e-11
	919			fructose 1,6-diphosphate/glucose 1,6-diphosphate/myo-inositol diphosphates	LC/MS neg	46896	C00354							1.15	1.12	0.87		1.87	3.45	4.21	0.15	1.84	2.25	0.28	1.22	0.51	0.63		1.19	0.68	0.81		4.4524e-06	9.3035e-08	0.6183	0.74	0.212	0.3441	0.203	0.3206	0.4795	1	0.2616	0.8797	4.47e-13	5e-15	9.8938e-05	0.0003	7.4868e-10
	921			dihydroxyacetone phosphate (DHAP)	LC/MS neg	15522	C00111	HMDB01473	668					0.92	0.93	0.9		1.42	4.83	5.98	0.14	3.4	4.21	0.2	1.24	0.67	0.83		1.25	0.69	0.86		1.1712e-08	2.9493e-10	0.0261	0.6978	0.8935	0.6732	0.2426	0.3488	0.2758	1	0.0931	0.6674	0	0	0.0005	0.0012	0
	926			3-phosphoglycerate	LC/MS neg	1414	C00597	HMDB00807	724					1.01	0.93	0.86		0.55	0.34	0.34	3.38	0.63	0.62	1.85	1	1.16	1.15		0.92	1.35	1.25		7.1723e-09	1.8677e-10	0.0071	0.6695	0.0399	0.1986	0.8309	0.7123	0.1146	1	0.0011	0.1159	0	0	1.5474e-09	1.6252e-08	1e-15
	927			phosphoenolpyruvate (PEP)	LC/MS neg	597	C00074	HMDB00263	1005					1.02	0.9	0.85		0.55	0.42	0.41	2.79	0.76	0.74	1.54	0.98	1.17	1.14		0.86	1.41	1.21		3.3776e-08	8.0345e-10	0.0027	0.6129	0.0303	0.1949	0.7758	0.686	0.0269	1	0.001	0.1159	2.7e-14	0	2.4447e-09	2.341e-08	1.5e-13
	928			pyruvate	LC/MS polar	22250	C00022	HMDB00243	1060					0.85	0.98	1.09		1.14	4.56	5.74	0.29	3.99	5.03	0.34	1.26	1.34	1.69		1.45	1.04	1.51		4.462e-09	1.189e-10	0.4614	0.7062	0.1329	0.2886	0.0599	0.1716	0.7506	1	0.3368	0.9359	0	0	0.1522	0.1884	4e-15
	929			lactate	LC/MS polar	527	C00186	HMDB00190	612					0.82	0.98	1.02		0.9	1.49	1.99	0.56	1.65	2.2	0.51	1.33	0.83	1.11		1.59	0.67	1.07		3.2862e-09	8.8372e-11	0.0802	0.6978	0.0498	0.1986	0.0038	0.0477	0.7595	1	0.7754	1	1.51e-10	1.19e-12	0.2556	0.2841	2.5734e-05
	932			glycerate	LC/MS polar	1572	C00258	HMDB00139	752					1	1.01	1.01		0.76	0.63	0.75	2.42	0.83	0.99	1.83	1.18	1.53	1.81		1.2	1.51	1.8		7.2871e-09	1.8904e-10	0.7641	0.7805	0.9841	0.6875	0.7823	0.6871	0.9735	1	0.8335	1	2.7e-06	1.39e-08	0.0619	0.0861	0.0006
	935		Pentose Phosphate Pathway	6-phosphogluconate	LC/MS neg	15442	C00345	HMDB01316	91493					0.91	0.98	0.79		1.94	1.67	1.16	1.68	0.86	0.6	3.27	0.7	2.81	1.96		0.75	3.23	2.42		9.8681e-11	3.215e-12	0.1712	0.6978	0.3365	0.4171	0.7228	0.6623	0.9647	1	0.0513	0.5061	2.89e-07	1.66e-09	0.0004	0.0011	0.0029
	936			ribulose 5-phosphate	LC/MS polar	1474	C00199	HMDB00618	439184					0.75	0.85	0.87		1.86	7.71	7.93	0.19	4.15	4.27	0.35	1.03	1.47	1.52		1.17	1.27	1.49		0.0124	0.0002	0.1948	0.6978	0.9272	0.6805	0.2884	0.387	0.5739	1	0.5242	0.9577	6.8e-09	4.55e-11	0.0198	0.0323	1.1106e-08
	937			ribose 5-phosphate	LC/MS polar	561	C00117	HMDB01548						0.87	1.08	0.88		4.09	15.37	15.71	0.09	3.76	3.84	0.36	1.02	1.37	1.4		1.26	1.36	1.71		0.0076	0.0001	0.3854	0.6978	0.5589	0.5291	0.6117	0.5986	0.7933	1	0.2109	0.8508	3.33e-09	2.29e-11	0.0186	0.031	5.5185e-09
	938			ribose 1-phosphate	LC/MS polar	1763	C00620	HMDB01489	439236					1.31	1.05	1.07		0.76	0.2	0.78	1.24	0.26	1.02	0.95	3.88	0.25	0.96		3.13	0.3	0.95		3e-14	2e-15	0.3429	0.6978	0.8019	0.6377	0.2808	0.3831	0.7328	1	0.8226	1	1.19e-12	1.3e-14	0.0566	0.0797	1.152e-12
	939			5-phosphoribosyl diphosphate (PRPP)	LC/MS neg	36840	C00119	HMDB00280	7339					1.44	1.05	0.97		0.98	0.63	1.74	0.44	0.64	1.78	0.43	2.76	0.28	0.77		2.02	0.41	0.83		2.1713e-11	7.8e-13	0.2435	0.6978	0.3201	0.4081	0.0643	0.1738	0.7644	1	0.8764	1	1.04e-08	6.85e-11	0.9984	0.7171	0.0027
	940			sedoheptulose-7-phosphate	LC/MS neg	35649	C05382	HMDB01068	616					0.86	0.99	1.02		1.58	9.24	9.38	0.13	5.86	5.95	0.2	1.02	1.17	1.19		1.17	0.99	1.16		0.1439	0.0022	0.4355	0.7062	0.7382	0.6233	0.3017	0.3974	0.9623	1	0.7168	0.9963	0	0	0.0037	0.0075	1e-15
	946		Pentose Metabolism	ribose	LC/MS polar	1471	C00121	HMDB00283	5779					0.95	0.98	1.02		0.96	0.84	1.45	1.27	0.87	1.51	1.22	1.73	1.07	1.84		1.78	0.99	1.78		0	0	0.5553	0.7197	0.7296	0.6191	0.4061	0.469	0.6483	1	0.7893	1	1.26e-07	7.45e-10	0.7213	0.61	0.0548
	947			ribitol	LC/MS polar	15772	C00474	HMDB00508	6912					0.74	0.93	1.37		0.79	0.91	1.34	0.62	1.16	1.7	0.49	1.48	0.57	0.84		1.85	0.31	0.57		0.0043	7.1913e-05	0.9922	0.825	0.1645	0.305	0.2304	0.3426	0.7745	1	0.1445	0.7763	0.2207	0.0008	0.368	0.3744	0.7101
	948			ribonate	LC/MS polar	27731	C01685	HMDB00867	5460677					0.9	0.96	0.98		0.44	0.52	0.76	1.82	1.17	1.72	0.81	1.47	0.94	1.39		1.57	0.87	1.36		1.6076e-06	3.4645e-08	0.5369	0.7155	0.7275	0.6191	0.3539	0.4327	0.7408	1	0.8482	1	1.35e-05	6.48e-08	6.2847e-06	2.8419e-05	3.7462e-05
	950			xylulose 5-phosphate	LC/MS polar	37285	C00231	HMDB00868	439190					0.98	0.96	0.92		1.89	6.12	7.11	0.19	3.24	3.77	0.35	1.16	1.15	1.33		1.14	1.22	1.39		0.1259	0.002	0.6406	0.74	0.9618	0.6817	0.7767	0.686	0.9462	1	0.6469	0.9955	6.34e-08	3.9e-10	0.0168	0.0281	1.0803e-07
	954			arabinose	LC/MS polar	575	C00216	HMDB00646	66308					0.84	1.04	0.95		0.7	2.32	2.31	0.6	3.3	3.29	0.42	1	1.4	1.39		1.23	1.22	1.51		4.2938e-07	9.7101e-09	0.1526	0.6978	0.1647	0.305	0.0252	0.1101	0.7074	1	0.5702	0.9955	4.55e-11	3.89e-13	0.0235	0.0373	2.9145e-08
	969			arabitol/xylitol	LC/MS polar	48885	C01904		6912					0.91	1.05	0.87		0.59	1.2	1.49	0.63	2.03	2.52	0.37	1.24	0.76	0.94		1.43	0.8	1.14		5.2036e-05	9.9095e-07	0.1612	0.6978	0.3485	0.4236	0.2307	0.3426	0.7244	1	0.1153	0.7176	1.44e-08	9.34e-11	0.0003	0.0008	0.0562
	970			ribulose/xylulose	LC/MS polar	54671			5289590					0.76	1.03	0.96		1.71	7.54	8.19	0.31	4.41	4.79	0.54	1.09	2.37	2.57		1.47	1.88	2.77		6.0228e-09	1.5743e-10	0.1915	0.6978	0.4757	0.4866	0.1004	0.2102	0.9631	1	0.5096	0.9577	1.3e-14	0	0.0032	0.0065	8.3e-14
	971			arabonate/xylonate	LC/MS polar	48255								0.9	0.99	0.99		0.62	0.96	1.14	1.31	1.56	1.85	0.81	1.18	1.26	1.49		1.3	1.15	1.5		5.1253e-07	1.1515e-08	0.446	0.7062	0.656	0.582	0.2386	0.3449	0.9672	1	0.925	1	0.0002	8.7e-07	0.0012	0.0028	0.9428
	972			sedoheptulose	LC/MS polar	53237		HMDB03219	5459879					0.74	0.86	1.03		1.29	3.28	3.38	0.69	2.55	2.63	0.89	1.03	2.26	2.33		1.2	1.63	1.95		6.2155e-07	1.3873e-08	0.1056	0.6978	0.2604	0.3762	0.0348	0.1274	0.4042	1	0.8719	1	1.91e-09	1.34e-11	0.1046	0.1377	1.8788e-08
	973			ribulonate/xylulonate	LC/MS polar	61858								0.85	1.03	1.14		0.87	1.2	1.6	1.16	1.39	1.85	1	1.33	1.39	1.86		1.63	1.03	1.68		2.0654e-09	5.6796e-11	0.9776	0.8242	0.1093	0.2642	0.0983	0.207	0.7379	1	0.1982	0.8294	6.83e-06	3.37e-08	0.312	0.3298	0.0923
	977		Glycogen Metabolism	maltotetraose	LC/MS neg	15910	C02052	HMDB01296	446495					1.25	0.69	1.46		0.13	0.03	0.02	168.63	0.22	0.12	22.05	0.57	4.78	2.71		0.31	4.08	1.28		1.0002e-05	1.9874e-07	0.7048	0.7587	0.1576	0.3027	0.215	0.3306	0.1809	1	0.4502	0.9577	9.37e-13	1e-14	3.2481e-05	0.0001	1.3663e-10
	979			maltotriose	LC/MS neg	44688	C01835	HMDB01262	439586					0.95	0.96	1.46		0.17	0.07	0.06	36.67	0.42	0.33	6.13	0.79	2.56	2.02		0.8	1.67	1.33		7.5072e-07	1.6595e-08	0.5318	0.7155	0.5182	0.5068	0.9067	0.7363	0.9226	1	0.1987	0.8294	0	0	2.4469e-11	5.311e-10	0
	982			maltose	LC/MS polar	15586	C00208	HMDB00163	10991489					0.8	0.9	1.13		0.17	0.1	0.1	16.36	0.57	0.56	2.82	0.98	1.61	1.58		1.11	1.14	1.26		0.0036	6.1167e-05	0.2983	0.6978	0.4678	0.4846	0.1809	0.2953	0.4165	1	0.7221	0.9963	0	0	1.215e-12	3.5954e-11	0
	1022		Fructose, Mannose and Galactose Metabolism	fructose	LC/MS polar	48195	C00095	HMDB00660	5984					0.71	0.96	1		0.64	0.72	0.8	1.48	1.13	1.26	0.94	1.11	1.07	1.19		1.5	0.76	1.14		0.0166	0.0003	0.2369	0.6978	0.3497	0.4236	0.0673	0.1738	0.8254	1	0.9796	1	0.1413	0.0005	0.0333	0.0509	0.0353
	1027			mannitol/sorbitol	LC/MS polar	46142	C00794	HMDB00247	5780					0.87	0.98	1.04		0.74	1.06	1.6	0.65	1.43	2.15	0.48	1.51	0.69	1.04		1.7	0.58	0.98		1.2057e-10	3.873e-12	0.3486	0.6978	0.2465	0.3666	0.0682	0.1738	0.8126	1	0.6387	0.9955	1.56e-07	9.19e-10	0.0181	0.0302	0.4215
	1028			mannose	LC/MS polar	48153	C00159	HMDB00169	18950					0.83	0.92	0.89		1.67	4.14	4.39	0.49	2.47	2.63	0.81	1.06	2.01	2.13		1.17	1.88	2.2		4.8701e-09	1.2877e-10	0.1259	0.6978	0.884	0.6694	0.2266	0.3421	0.5983	1	0.3475	0.9359	3.78e-11	3.3e-13	0.0013	0.0031	9.0912e-11
	1029			mannose-6-phosphate	LC/MS polar	1469	C00275	HMDB01078	439198					0.77	0.8	0.96		1.42	7.09	8.45	0.23	4.99	5.94	0.33	1.19	1.63	1.94		1.24	1.31	1.62		0.0002	3.1858e-06	0.1131	0.6978	0.7627	0.628	0.175	0.2884	0.2933	1	0.7187	0.9963	3.59e-12	3.6e-14	0.0735	0.1006	5.4876e-11
	1038			galactitol (dulcitol)	LC/MS polar	1117	C01697	HMDB00107	11850					0.83	0.89	0.99		1.07	1.57	1.23	1.12	1.47	1.15	1.19	0.79	1.75	1.38		0.84	1.47	1.24		3.8874e-06	8.1727e-08	0.0745	0.6978	0.5632	0.5294	0.082	0.1864	0.2676	1	0.7917	1	1.29e-05	6.21e-08	0.4879	0.4656	7.7183e-05
	1039			galactose 1-phosphate	LC/MS polar	15706	C00446	HMDB00645	123912					0.81	0.9	1.03		0.95	2.89	8.01	0.2	3.04	8.44	0.19	2.78	0.58	1.61		3.08	0.46	1.4		4.0406e-08	9.5456e-10	0.3268	0.6978	0.6247	0.5637	0.1929	0.3134	0.6737	1	0.9766	1	4.02e-11	3.47e-13	0.8339	0.6687	0.0002
	1052		Nucleotide Sugar	UDP-glucose	LC/MS polar	32344	C00029	HMDB00286	8629					1.3	1.28	0.8		0.79	0.12	0.09	10.77	0.15	0.11	8.47	0.73	1.26	0.92		0.71	2.06	1.47		0.0045	7.4437e-05	0.5148	0.7062	0.2419	0.3666	0.3314	0.4163	0.2481	1	0.3149	0.9338	1e-15	0	0.1845	0.2211	5.83e-13
	1056			UDP-galactose	LC/MS polar	15860	C00052	HMDB00302	18068					0.99	1.18	1.07		0.89	0.37	0.19	7.3	0.41	0.22	6.48	0.52	2.67	1.4		0.62	2.5	1.54		3.6881e-09	9.8656e-11	0.4798	0.7062	0.7533	0.6259	0.9791	0.7515	0.3205	1	0.7994	1	1.88e-13	2e-15	0.4903	0.4656	6.1159e-07
	1057			UDP-glucuronate	LC/MS neg	2763	C00167	HMDB00935	17473					0.87	1.24	0.76		0.66	0.38	0.11	16.51	0.57	0.17	10.85	0.31	6.2	1.89		0.43	7.14	3.08		0	0	0.404	0.7041	0.048	0.1986	0.4428	0.4952	0.1535	1	0.0388	0.4297	0	0	0.0078	0.0144	8.3316e-08
	1059			guanosine 5'-diphospho-fucose	LC/MS polar	15903								0.7	1.24	1.1		1.19	1.56	0.65	3.92	1.31	0.54	4.68	0.41	6.13	2.54		0.74	3.87	2.86		4.25e-13	1.8e-14	0.7248	0.7647	0.1092	0.2642	0.0592	0.1716	0.3519	1	0.6983	0.9963	5.71e-11	4.83e-13	0.2594	0.2863	0.0113
	1063			UDP-N-acetylglucosamine/galactosamine	LC/MS polar	46148								0.85	1.03	1.01		0.8	0.63	0.41	5.74	0.78	0.51	4.62	0.66	3.59	2.36		0.8	3.01	2.42		0	0	0.2839	0.6978	0.0949	0.243	0.0194	0.1045	0.6424	1	0.9255	1	0	0	0.0264	0.0413	7.2219e-06
	1064			cytidine 5'-monophospho-N-acetylneuraminic acid	LC/MS polar	36831	C00128	HMDB01176	448209					0.88	0.95	1.03		0.82	1.62	1.85	1.12	1.97	2.25	0.92	1.14	1.81	2.07		1.24	1.54	1.91		0	0	0.2033	0.6978	0.2675	0.3811	0.0591	0.1716	0.4988	1	0.7004	0.9963	6.57e-11	5.5e-13	0.0482	0.0697	3.8595e-06
	1071		Aminosugar Metabolism	glucosamine-6-phosphate	LC/MS polar	580	C00352	HMDB01254	439217					0.7	0.88	0.86		1.27	13.62	14.7	0.14	10.74	11.59	0.17	1.08	1.86	2.01		1.35	1.51	2.04		3.2509e-05	6.2428e-07	0.0659	0.6978	0.6984	0.6042	0.0937	0.2022	0.6058	1	0.3038	0.9286	1e-15	0	0.278	0.3017	2.2e-14
	1075			glucuronate	LC/MS polar	15443	C00191	HMDB00127	444791					0.91	0.91	1.07		0.64	0.31	0.33	6.42	0.49	0.51	4.13	1.05	2.01	2.1		1.05	1.71	1.79		4.1157e-10	1.2464e-11	0.5651	0.7275	0.4981	0.498	0.4135	0.4735	0.4196	1	0.5274	0.9577	7.7e-14	1e-15	0.0025	0.0054	3.348e-10
	1079			N-acetylglucosamine 6-phosphate	LC/MS polar	15107	C00357	HMDB02817	439219					0.88	0.9	1.09		1.32	1.5	3.69	0.43	1.14	2.79	0.57	2.45	0.65	1.6		2.51	0.53	1.32		1.77e-13	8e-15	0.4779	0.7062	0.3067	0.3991	0.2555	0.3567	0.352	1	0.3975	0.9577	8.44e-11	6.9e-13	0.0299	0.0463	0.002
	1080			N-acetyl-glucosamine 1-phosphate	LC/MS polar	15741	C04256	HMDB01367	440364					0.87	0.95	1.05		0.57	0.39	0.51	2.99	0.68	0.89	1.7	1.31	1.16	1.52		1.43	0.96	1.36		0.0004	6.8824e-06	0.5585	0.7214	0.5995	0.552	0.3121	0.4064	0.6853	1	0.6836	0.9963	4.05e-08	2.54e-10	0.0003	0.0009	3.6037e-08
	1086			N-acetylneuraminate	LC/MS pos early	32377	C00270	HMDB00230	439197					0.91	0.96	1.04		1.75	4.64	5.5	0.27	2.66	3.15	0.47	1.18	1.26	1.5		1.24	1.11	1.37		2.96e-13	1.3e-14	0.1858	0.6978	0.0932	0.2426	0.0333	0.1274	0.2967	1	0.3558	0.9359	0	0	9.9162e-10	1.2073e-08	0
	1097			N-acetylglucosaminylasparagine	LC/MS pos early	48149	C04540	HMDB00489	123826					0.89	1.03	1.04		0.67	0.7	1.06	1.11	1.06	1.58	0.74	1.5	0.78	1.17		1.73	0.67	1.16		6.76e-13	2.9e-14	0.7231	0.7647	0.1418	0.2936	0.0712	0.1753	0.6179	1	0.4656	0.9577	2.54e-06	1.31e-08	6.7962e-05	0.0002	0.0002
	1098			erythronate	LC/MS polar	42420		HMDB00613	2781043					0.84	0.99	1		0.48	0.68	1.13	1.24	1.43	2.37	0.59	1.65	0.85	1.4		1.95	0.71	1.39		1.78e-13	8e-15	0.1156	0.6978	0.1445	0.2936	0.0141	0.0831	0.9017	1	0.9309	1	7.17e-10	5.26e-12	8.4393e-09	7.0453e-08	0.0001
	1100			N-acetylglucosamine/N-acetylgalactosamine	LC/MS pos early	46539		HMDB00215	24139					0.88	1.04	0.94		1.55	2.5	2.24	0.66	1.6	1.44	1.02	0.9	1.63	1.47		1.05	1.54	1.62		1.6e-14	1e-15	0.1317	0.6978	0.1484	0.2936	0.035	0.1274	0.538	1	0.2779	0.8941	8.38e-13	9e-15	1.5552e-06	7.7897e-06	1.69e-13
	1101		Advanced Glycation End-product	N6-carboxymethyllysine	LC/MS pos early	36713			123800					1	1	1.11		0.48	0.48	2.42	0.31	1	4.99	0.15	4.99	0.15	0.75		4.98	0.13	0.67		0	0	0.5236	0.7105	0.823	0.648	1	0.7515	0.8007	1	0.3948	0.9577	9.02e-13	1e-14	0.0026	0.0054	0.0013
	1105	Energy	TCA Cycle	citrate	LC/MS neg	1564	C00158	HMDB00094	311					1.07	0.98	1.05		1.3	2.55	3.39	0.15	1.97	2.61	0.19	1.33	0.38	0.5		1.22	0.38	0.47		0	0	0.3203	0.6978	0.5244	0.5098	0.2151	0.3306	0.7543	1	0.4294	0.9577	0	0	0.0014	0.0033	3.35e-13
	1107			aconitate [cis or trans]	LC/MS neg	46173								1.1	0.99	1.03		0.93	1.6	2.37	0.2	1.73	2.56	0.19	1.48	0.32	0.48		1.34	0.34	0.46		0	0	0.3236	0.6978	0.4657	0.4846	0.1316	0.2454	0.8493	1	0.7047	0.9963	3e-15	0	0.3576	0.3673	0.0002
	1110			isocitric lactone	LC/MS polar	54724			98259					0.71	0.99	1.05		1.21	1.78	1.44	0.56	1.47	1.19	0.68	0.81	1	0.81		1.13	0.68	0.76		0.0469	0.0007	0.1582	0.6978	0.3021	0.3964	0.0511	0.1568	0.5094	1	0.8515	1	0.0019	7.84e-06	0.2899	0.3135	0.0008
	1111			alpha-ketoglutarate	LC/MS polar	528	C00026	HMDB00208	51					1.21	0.95	0.98		1.07	1.02	0.67	2.17	0.95	0.63	2.31	0.66	2.2	1.46		0.52	2.71	1.42		1.5923e-08	3.9095e-10	0.6757	0.7523	0.5019	0.4986	0.2375	0.3449	0.7227	1	0.9107	1	3.7e-06	1.87e-08	0.6821	0.5922	0.7453
	1113			succinylcarnitine (C4-DC)	LC/MS pos early	37058		HMDB61717	71464481					0.86	1.02	1.24		1.39	1.38	1.36	1.35	1	0.98	1.88	0.98	1.87	1.84		1.16	1.31	1.52		1.13e-09	3.2102e-11	0.5548	0.7197	0.0328	0.1986	0.1226	0.2402	0.7539	1	0.0275	0.3744	5.74e-08	3.57e-10	0.0021	0.0045	0.0017
	1114			succinate	LC/MS pos early	1437	C00042	HMDB00254	1110					1.01	1.06	1.06		0.97	0.74	0.33	5.8	0.77	0.35	5.6	0.45	4.3	1.94		0.47	4.13	1.95		1.67e-13	8e-15	0.6451	0.74	0.9736	0.6871	0.8906	0.7354	0.8317	1	0.654	0.9955	7.45e-12	7.1e-14	0.7992	0.6521	0.0448
	1115			fumarate	LC/MS polar	1643	C00122	HMDB00134	444972					0.84	0.95	1.01		1.07	1.37	1.66	0.93	1.28	1.55	0.99	1.21	1.27	1.54		1.38	1.06	1.47		1.0138e-09	2.9039e-11	0.0531	0.6978	0.1417	0.2936	0.0096	0.0741	0.4335	1	0.9474	1	3.04e-07	1.73e-09	0.4249	0.4167	0.0002
	1116			malate	LC/MS polar	1303	C00149	HMDB00156	525					0.84	0.98	0.99		1.01	1.24	1.31	1.03	1.23	1.29	1.04	1.05	1.28	1.35		1.24	1.08	1.34		1.1832e-09	3.3201e-11	0.0184	0.6978	0.0237	0.1868	0.0006	0.0463	0.7079	1	0.9023	1	2.62e-07	1.51e-09	0.8306	0.6677	0.0001
	1126			2-methylcitrate/homocitrate	LC/MS neg	52282								0.85	1.07	1.05		2.18	5.64	7.74	0.24	2.59	3.55	0.53	1.37	1.36	1.87		1.73	1.11	1.91		1.8e-14	1e-15	0.8014	0.7969	0.045	0.1986	0.0302	0.1196	0.2715	1	0.4875	0.9577	0	0	1.3598e-09	1.5267e-08	0
	1128		Oxidative Phosphorylation	acetylphosphate	LC/MS polar	15488	C00227	HMDB01494	186					1.06	1.02	0.86		1.13	2.31	2.31	0.48	2.05	2.06	0.53	1	1.1	1.1		0.96	1.36	1.31		0.0295	0.0005	0.625	0.74	0.4977	0.498	0.7477	0.673	0.9451	1	0.2203	0.8513	6.42e-07	3.55e-09	0.5423	0.5001	2.8401e-06
	1130			phosphate	LC/MS neg	42109	C00009	HMDB01429	1061					1.01	0.99	1.02		1.03	1.26	1.4	0.76	1.22	1.36	0.79	1.11	0.96	1.07		1.09	0.94	1.03		1.4951e-05	2.9366e-07	0.7033	0.7587	0.5749	0.5372	0.855	0.722	0.614	1	0.329	0.9359	2.11e-13	3e-15	0.2378	0.2708	1.3768e-09
	1132	Lipid	Fatty Acid Synthesis	malonylcarnitine	LC/MS pos early	37059		HMDB02095	22833583					1	1.06	1.11		1.41	2.57	3.65	0.6	1.82	2.59	0.84	1.42	1.54	2.18		1.51	1.38	2.07		9e-15	0	0.3044	0.6978	0.6344	0.5709	0.8722	0.7293	0.412	1	0.2631	0.8797	1.24e-12	1.3e-14	0.0013	0.0031	1.5629e-10
	1133			malonate	LC/MS polar	15872	C00383	HMDB00691	867					0.98	0.99	1.09		0.92	0.88	0.8	1.55	0.96	0.87	1.42	0.91	1.37	1.24		0.91	1.24	1.12		5.6123e-06	1.1517e-07	0.6526	0.74	0.4169	0.4591	0.7904	0.6871	0.765	1	0.1838	0.8294	0.0001	4.4e-07	0.4101	0.4102	0.1635
	1135		Fatty Acid Metabolism	acetyl CoA	LC/MS neg	43840	C00024	HMDB01206	444493					1	1.04	1.01		1	1	1	0.75	1	1	0.75	1	0.75	0.75		1.04	0.74	0.77		1.4591e-08	3.6083e-10	0.7202	0.7647	0.8738	0.6679	1	0.7515	0.5305	1	0.9935	1	1.69e-08	1.09e-10	1	0.7171	1
	1148		Medium Chain Fatty Acid	caproate (6:0)	LC/MS neg	32489	C01585	HMDB00535	8892					0.92	0.99	0.99		0.81	0.88	0.84	2.92	1.08	1.04	2.37	0.96	2.57	2.47		1.03	2.41	2.47		1.159e-11	4.35e-13	0.7494	0.7739	0.9868	0.6875	0.7651	0.6815	0.9445	1	0.8533	1	8.04e-07	4.38e-09	0.265	0.2898	0.3084
	1149			heptanoate (7:0)	LC/MS neg	1644	C17714	HMDB00666	8094					0.64	1.97	1.11		1.21	1.1	0.66	2.01	0.92	0.55	2.43	0.6	2.22	1.34		1.85	1.28	2.37		0.0234	0.0004	0.4649	0.7062	0.2002	0.3348	0.3838	0.4559	0.0955	1	0.656	0.9955	0.2171	0.0008	0.9577	0.7171	0.996
	1150			caprylate (8:0)	LC/MS neg	32492	C06423	HMDB00482	379					0.73	0.78	4.43		0.9	0.74	0.96	6.32	0.82	1.06	5.72	1.29	4.7	6.07		1.39	0.77	1.07		0.0056	9.2327e-05	0.4567	0.7062	0.0139	0.1868	0.1988	0.3177	0.7737	1	0.0063	0.2198	0.0001	4.4e-07	0.6708	0.5855	0.1951
	1152			caprate (10:0)	LC/MS neg	1642	C01571	HMDB00511	2969					0.88	0.96	1.17		1.05	0.95	1.03	1.34	0.91	0.99	1.4	1.09	1.27	1.38		1.19	0.96	1.14		0.0037	6.2736e-05	0.6845	0.7523	0.3007	0.3964	0.2201	0.3352	0.6768	1	0.3441	0.9359	0.0009	3.78e-06	0.5732	0.5198	0.5866
	1288		Fatty Acid, Dicarboxylate	glutarate (C5-DC)	LC/MS polar	396	C00489	HMDB00661	743					0.94	0.93	0.99		0.52	0.71	1.09	1.28	1.38	2.1	0.66	1.52	0.91	1.39		1.51	0.86	1.3		9.2423e-06	1.8417e-07	0.5008	0.7062	0.9331	0.6805	0.705	0.6519	0.5125	1	0.8935	1	0.0001	4.4e-07	0.0002	0.0007	0.0206
	1291			3-methylglutarate/2-methylglutarate	LC/MS polar	54676		HMDB00752						0.81	0.93	1.29		0.71	1.18	1.17	1.66	1.68	1.66	1.17	0.99	1.96	1.94		1.13	1.24	1.4		0.0284	0.0005	0.9908	0.825	0.4759	0.4866	0.3905	0.4578	0.9863	1	0.3889	0.9577	0.0809	0.0003	0.2469	0.2781	0.5485
	1292			2-hydroxyglutarate	LC/MS polar	37253	C02630	HMDB00606	43					0.96	0.92	1.01		1.19	1.47	1.21	1.23	1.23	1.02	1.46	0.83	1.8	1.49		0.79	1.73	1.36		4.3e-13	1.8e-14	0.3297	0.6978	0.6541	0.582	0.6146	0.5986	0.2176	1	0.9593	1	6.53e-08	3.99e-10	0.0341	0.0517	1.5995e-05
	1294			adipate (C6-DC)	LC/MS polar	21134	C06104	HMDB00448	196					1.01	0.83	1.39		0.26	0.18	0.14	10.14	0.68	0.55	2.63	0.81	1.78	1.45		0.67	1.29	0.86		0.0135	0.0002	0.5851	0.7383	0.1807	0.3158	0.8547	0.722	0.3485	1	0.0941	0.6674	1.16e-07	6.88e-10	0.0002	0.0007	1.155e-06
	1296			2-hydroxyadipate	LC/MS polar	31934	C02360	HMDB00321	193530					0.5	0.64	1.16		0.95	1.56	1.83	0.79	1.65	1.94	0.75	1.17	1.24	1.45		1.52	0.53	0.8		0.0586	0.0009	0.0755	0.6978	0.18	0.3158	0.0727	0.177	0.0782	1	0.6257	0.9955	0.1652	0.0006	0.7941	0.6512	0.4057
	1297			3-hydroxyadipate	LC/MS polar	62069		HMDB00345	151913					0.89	0.96	1.07		1.51	2.87	0.46	3.38	1.89	0.3	5.12	0.16	9.69	1.54		0.17	8.05	1.38		0	0	0.784	0.79	0.8252	0.648	0.5572	0.5711	0.8646	1	0.7764	1	1.21e-10	9.74e-13	0.0544	0.0774	3.5214e-05
	1301			pimelate (C7-DC)	LC/MS polar	15704	C02656	HMDB00857	385					1.01	0.97	0.85		0.44	0.62	0.77	1	1.39	1.73	0.45	1.24	0.62	0.77		1.19	0.73	0.87		0.0035	5.865e-05	0.4594	0.7062	0.7496	0.6257	0.9448	0.7462	0.7185	1	0.3232	0.9349	0.0015	6.22e-06	0.0014	0.0032	0.0412
	1307			azelate (C9-DC)	LC/MS polar	18362	C08261	HMDB00784	2266					1.07	1.18	0.85		0.44	0.29	0.43	2.82	0.65	0.99	1.24	1.51	0.81	1.22		1.66	1.02	1.69		1.0974e-05	2.174e-07	0.9563	0.8163	0.1674	0.305	0.6158	0.5986	0.2775	1	0.139	0.7763	0.0111	4.36e-05	0.0702	0.0972	0.0006
	1356		Fatty Acid, Amino	2-aminoheptanoate	LC/MS pos early	43761			227939					1	0.92	0.88		0.69	0.77	1.28	1.23	1.11	1.86	0.85	1.68	0.94	1.58		1.54	1.07	1.65		1.2797e-06	2.7752e-08	0.3781	0.6978	0.8234	0.648	0.9858	0.7515	0.5107	1	0.3935	0.9577	0.0031	1.25e-05	0.0606	0.0846	0.134
	1373		Fatty Acid Metabolism (also BCAA Metabolism)	butyrylcarnitine (C4)	LC/MS pos early	32412	C02862	HMDB02013	439829					0.99	1	0.97		3.64	1.59	0.28	7.15	0.44	0.08	26.04	0.18	11.38	1.99		0.18	11.58	2.05		7e-15	0	0.8467	0.8077	0.9153	0.6793	0.9697	0.7515	0.9367	1	0.6514	0.9955	1e-11	9.2e-14	0.0004	0.0011	0.1187
	1376			propionylcarnitine (C3)	LC/MS pos early	32452	C03017	HMDB00824	107738					1.08	0.94	0.98		1.97	1.55	1.85	0.77	0.79	0.94	1.51	1.19	1.19	1.42		1.03	1.32	1.36		0.0001	2.3302e-06	0.8244	0.8002	0.615	0.5614	0.4361	0.4901	0.5459	1	0.8355	1	0.0003	1.3e-06	9.1836e-05	0.0003	0.0027
	1379			methylmalonate (MMA)	LC/MS polar	1496	C02170	HMDB00202	487					0.83	0.97	1.04		0.57	0.65	0.75	1.82	1.15	1.31	1.04	1.14	1.19	1.36		1.34	0.95	1.27		0.0007	1.3372e-05	0.1863	0.6978	0.2182	0.3488	0.0388	0.1365	0.6005	1	0.7364	1	2.73e-07	1.57e-09	4.0759e-07	2.2117e-06	9.7305e-06
	1401		Fatty Acid Metabolism(Acyl Carnitine)	acetylcarnitine (C2)	LC/MS pos early	32198	C02571	HMDB00201	1					0.96	1.01	1.07		2.34	1.89	0.84	1.17	0.81	0.36	2.73	0.44	2.21	0.97		0.47	1.98	0.92		1e-15	0	0.9243	0.8115	0.7008	0.6042	0.6134	0.5986	0.9934	1	0.4985	0.9577	3.81e-13	4e-15	1.0012e-09	1.2073e-08	4.8144e-08
	1403			3-hydroxybutyrylcarnitine (1)	LC/MS pos early	43264		HMDB13127	53481617					1.03	1.05	1.22		2.65	4.61	0.75	2.68	1.74	0.28	7.09	0.16	12.34	2.01		0.16	10.42	1.72		0	0	0.0798	0.6978	0.2845	0.3912	0.6709	0.6357	0.7385	1	0.024	0.3744	0	0	1.9052e-10	2.8194e-09	2e-15
	1404			3-hydroxybutyrylcarnitine (2)	LC/MS pos early	52984		HMDB13127						0.98	1.09	1.25		2.6	2.35	1.1	1.16	0.9	0.42	3.03	0.47	2.73	1.28		0.52	2.16	1.12		1e-15	0	0.1117	0.6978	0.2143	0.3449	0.8985	0.7354	0.5454	1	0.0248	0.3744	7.8e-14	1e-15	1.1162e-10	1.7305e-09	2.6325e-10
	1406			hexanoylcarnitine (C6)	LC/MS pos early	32328		HMDB00705	6426853					1.22	0.88	0.92		2.23	2.49	1.99	0.68	1.12	0.89	1.51	0.8	1.69	1.35		0.58	2.24	1.29		0.0015	2.6431e-05	0.9315	0.8115	0.5337	0.5124	0.3884	0.4569	0.6143	1	0.61	0.9955	0.008	3.17e-05	0.0039	0.0077	0.0011
	1413			laurylcarnitine (C12)	LC/MS pos late	34534		HMDB02250	10427569					1.09	0.97	1.33		1	1.83	1.67	0.8	1.83	1.67	0.8	0.91	1.47	1.34		0.82	1.2	0.98		0.004	6.662e-05	0.0862	0.6978	0.1853	0.3171	0.3838	0.4559	0.8138	1	0.0211	0.3744	2.99e-06	1.52e-08	1	0.7171	6.3247e-06
	1414			myristoylcarnitine (C14)	LC/MS pos late	33952		HMDB05066	6426854					1.04	1	1.33		4.21	19	24.17	0.06	4.52	5.74	0.26	1.27	1.17	1.48		1.22	0.91	1.12		0.0001	2.2829e-06	0.0144	0.6978	0.0525	0.2036	0.5656	0.5777	0.744	1	0.0011	0.1159	0	0	7.75e-13	2.8052e-11	0
	1416			palmitoylcarnitine (C16)	LC/MS pos late	44681	C02990	HMDB00222	461					0.98	1.01	1.21		3.08	6.02	9.74	0.09	1.96	3.16	0.27	1.62	0.53	0.85		1.66	0.42	0.71		0	0	0.0954	0.6978	0.0335	0.1986	0.6981	0.649	0.8747	1	0.0029	0.1289	0	0	4.57e-13	1.8582e-11	0
	1417			palmitoleoylcarnitine (C16:1)	LC/MS pos late	53223			71464547					1.04	0.98	1.36		3.56	14.89	29.47	0.04	4.18	8.27	0.13	1.98	0.53	1.05		1.86	0.41	0.76		2.9e-14	1e-15	0.0401	0.6978	0.0464	0.1986	0.7143	0.6587	0.9917	1	0.002	0.1185	0	0	3.6427e-11	7.4125e-10	0
	1418			stearoylcarnitine (C18)	LC/MS pos late	34409		HMDB00848	6426855					0.92	1.06	1.22		2.29	4.51	7.88	0.15	1.97	3.44	0.35	1.75	0.7	1.22		2.02	0.52	1.06		1.2616e-11	4.67e-13	0.3172	0.6978	0.0875	0.2354	0.3066	0.4023	0.5517	1	0.0348	0.4166	0	0	2.2394e-08	1.7359e-07	1e-14
	1419			linoleoylcarnitine (C18:2)	LC/MS pos late	46223		HMDB06469	6450015					1.07	1.09	1.27		7.91	14.66	11.93	0.11	1.85	1.51	0.85	0.81	1.58	1.29		0.83	1.33	1.1		1.0907e-06	2.373e-08	0.0112	0.6978	0.3012	0.3964	0.4548	0.502	0.2978	1	0.0078	0.2499	0	0	0	7e-15	0
	1422			oleoylcarnitine (C18:1)	LC/MS pos late	35160		HMDB05065	6441392					1.02	1	1.28		2.45	6.14	14.6	0.07	2.5	5.96	0.18	2.38	0.45	1.07		2.34	0.36	0.84		0	0	0.0349	0.6978	0.0458	0.1986	0.76	0.6788	0.9133	1	0.0018	0.1185	0	0	2.1069e-10	2.9824e-09	0
	1424			myristoleoylcarnitine (C14:1)	LC/MS pos late	48182			90659872					1.1	1	1.56		1	1.25	2.53	0.53	1.25	2.53	0.53	2.02	0.66	1.34		1.85	0.47	0.86		5.3515e-07	1.1984e-08	0.0554	0.6978	0.1459	0.2936	0.5894	0.5851	0.9096	1	0.0088	0.2499	1.01e-07	6.03e-10	1	0.7171	0.0988
	1434			arachidoylcarnitine (C20)	LC/MS pos late	57513		HMDB06460						0.94	1.06	1.35		1.58	5.26	10.32	0.13	3.33	6.54	0.21	1.96	0.71	1.39		2.21	0.49	1.09		1.1104e-10	3.601e-12	0.1235	0.6978	0.0787	0.2252	0.5453	0.5657	0.5048	1	0.0113	0.3029	0	0	0.0042	0.0081	4.44e-13
	1435			arachidonoylcarnitine (C20:4)	LC/MS pos late	57518								0.81	1.09	1.21		4.13	19.29	26.65	0.06	4.67	6.45	0.25	1.38	1.18	1.63		1.86	0.79	1.47		9.3775e-07	2.0531e-08	0.9067	0.8095	0.0592	0.205	0.0672	0.1738	0.5487	1	0.146	0.7763	0	0	5.9698e-11	1.0798e-09	0
	1436			adrenoylcarnitine (C22:4)	LC/MS pos late	57528								0.86	1.24	1.3		1.67	2.05	2.73	0.41	1.23	1.64	0.68	1.33	0.83	1.11		1.93	0.55	1.06		0.0016	2.7862e-05	0.3962	0.7025	0.1825	0.3158	0.3262	0.4162	0.3741	1	0.1223	0.7401	8.62e-05	3.94e-07	0.0217	0.035	0.0004
	1437			behenoylcarnitine (C22)	LC/MS pos late	57514								0.76	1.02	1		1	1.58	2.7	0.76	1.58	2.7	0.76	1.7	1.21	2.06		2.3	0.92	2.11		4.3211e-10	1.3029e-11	0.2911	0.6978	0.2286	0.3582	0.049	0.1564	0.8003	1	0.9425	1	8.41e-08	5.1e-10	1	0.7171	0.0025
	1438			dihomo-linolenoylcarnitine (20:3n3 or 6)	LC/MS pos late	57521								0.88	1.08	1.36		3.76	4.67	5.07	0.47	1.24	1.35	1.79	1.08	2.22	2.41		1.32	1.45	1.91		2.5238e-09	6.9124e-11	0.2746	0.6978	0.0547	0.2036	0.327	0.4162	0.7027	1	0.0159	0.3549	1.34e-10	1.07e-12	1.9848e-08	1.5761e-07	1.9541e-10
	1439			dihomo-linoleoylcarnitine (C20:2)	LC/MS pos late	57520								0.87	1.04	1.32		2.33	4.77	4.75	0.25	2.04	2.03	0.59	1	1.21	1.2		1.19	0.8	0.95		0.5765	0.0088	0.4099	0.7048	0.0599	0.205	0.264	0.3662	0.807	1	0.0254	0.3744	1.65e-11	1.46e-13	1.0348e-05	4.3756e-05	1.0287e-11
	1440			eicosenoylcarnitine (C20:1)	LC/MS pos late	57519								0.93	1.09	1.33		1.55	3.2	7.74	0.13	2.07	5.01	0.2	2.42	0.41	0.98		2.85	0.28	0.81		0	0	0.0948	0.6978	0.0393	0.1986	0.4329	0.4897	0.4253	1	0.0054	0.2054	0	0	0.002	0.0045	2.0916e-10
	1445			docosahexaenoylcarnitine (C22:6)	LC/MS pos late	57523								0.96	1.06	1.24		2.15	3.12	4.35	0.72	1.45	2.03	1.55	1.39	2.25	3.14		1.53	1.75	2.68		2.4e-14	1e-15	0.3364	0.6978	0.4107	0.4591	0.7335	0.6655	0.6409	1	0.1274	0.7427	3.38e-13	4e-15	6.8416e-07	3.5357e-06	6.4334e-11
	1447			lignoceroylcarnitine (C24)	LC/MS pos late	57515								0.82	1.09	1.19		1.12	2.72	3.37	0.66	2.44	3.01	0.74	1.24	1.8	2.23		1.63	1.25	2.04		4.4984e-09	1.194e-10	0.9592	0.8163	0.0874	0.2354	0.0683	0.1738	0.497	1	0.2769	0.8941	1.2e-14	0	0.2403	0.2716	3.478e-12
	1457		Carnitine Metabolism	deoxycarnitine	LC/MS pos early	36747	C01181	HMDB01161	134					0.87	0.99	1.34		0.95	2.41	4.19	0.57	2.54	4.42	0.54	1.74	1.37	2.39		1.97	0.9	1.76		3.6e-14	2e-15	0.3685	0.6978	0.0051	0.1309	0.1258	0.2403	0.9112	1	0.0025	0.1241	0	0	0.5999	0.5395	6.8725e-11
	1458			carnitine	LC/MS pos early	15500	C00318	HMDB00062	10917					0.9	1.03	1.11		3.84	5.46	5.06	0.34	1.42	1.32	1.3	0.93	1.85	1.72		1.06	1.49	1.59		0	0	0.8243	0.8002	0.0413	0.1986	0.0632	0.1738	0.5765	1	0.0903	0.6674	0	0	0	0	0
	1463		Ketone Bodies	3-hydroxybutyrate (BHBA)	LC/MS polar	542	C01089	HMDB00357	441					0.97	0.98	1.14		1.48	2.13	0.42	3.26	1.44	0.28	4.84	0.2	6.97	1.37		0.2	5.9	1.18		0	0	0.6446	0.74	0.5318	0.5122	0.8525	0.722	0.8417	1	0.2402	0.8797	3e-14	0	0.0081	0.0147	7.1225e-06
	1464		Neurotransmitter	acetylcholine	LC/MS pos early	18790	C01996	HMDB00895						0.9	0.91	1.29		1.43	4.94	6.4	0.19	3.45	4.47	0.27	1.29	0.95	1.23		1.3	0.66	0.86		0.0319	0.0005	0.8252	0.8002	0.3664	0.4311	0.4136	0.4735	0.5553	1	0.3066	0.9286	6.45e-08	3.95e-10	0.2034	0.2391	3.2205e-06
	1466		Fatty Acid Metabolism (Acyl Choline)	palmitoylcholine	LC/MS pos late	52944			151731					1.07	1	1.26		1.31	1.63	2.52	0.62	1.25	1.93	0.81	1.54	1.01	1.56		1.45	0.86	1.25		1.7958e-06	3.8341e-08	0.0811	0.6978	0.1826	0.3158	0.3863	0.456	0.833	1	0.0195	0.3744	8.51e-08	5.14e-10	0.0443	0.0647	0.0002
	1467			oleoylcholine	LC/MS pos late	53260								0.91	0.93	1.09		1	1.17	2.55	0.71	1.17	2.55	0.71	2.18	0.83	1.81		2.22	0.7	1.54		1.5994e-09	4.4157e-11	0.9126	0.8115	0.5611	0.5291	0.4925	0.5301	0.7754	1	0.435	0.9577	1.09e-06	5.9e-09	1	0.7171	0.2997
	1480		Fatty Acid, Monohydroxy	2-hydroxyheptanoate	LC/MS neg	61827			2750949					0.92	0.99	0.97		0.92	1.26	1	1.99	1.37	1.09	1.82	0.79	2.5	1.99		0.85	2.39	2.03		1.15e-13	6e-15	0.662	0.7438	0.9866	0.6875	0.7241	0.6623	0.899	1	0.7811	1	1.32e-06	7.05e-09	0.5477	0.5023	0.172
	1481			2-hydroxyoctanoate	LC/MS neg	22036		HMDB02264	94180					0.81	1.04	1.33		0.73	0.48	0.87	2.5	0.66	1.19	1.81	1.8	1.2	2.16		2.32	0.73	1.69		1.6631e-07	3.8238e-09	0.7259	0.7647	0.131	0.2864	0.2183	0.334	0.8549	1	0.1015	0.6875	0.0008	3.37e-06	0.2327	0.2668	0.0034
	1482			2-hydroxydecanoate	LC/MS neg	42489			21488					0.98	1.09	1.02		0.81	0.64	0.7	2.59	0.79	0.87	2.1	1.09	1.66	1.82		1.22	1.59	1.94		1.9174e-06	4.0684e-08	0.4672	0.7062	0.9616	0.6817	0.791	0.6871	0.522	1	0.7216	0.9963	0.0001	4.4e-07	0.3093	0.3287	0.0087
	1483			2-hydroxylignocerate	LC/MS polar	61699	C17873	HMDB39540	102430					1.08	0.96	1.18		1	1	8.02	0.08	1	8.02	0.08	7.98	0.08	0.67		7.08	0.08	0.54		0	0	0.2578	0.6978	0.2026	0.3357	0.4442	0.4952	0.501	1	0.0658	0.5858	0	0	1	0.7171	0.9203
	1485			2-hydroxynervonate	LC/MS neg	61698			5312783					1.03	1.03	1.08		1	1	9.03	0.05	1	9.03	0.05	9.03	0.05	0.44		9.05	0.05	0.42		0	0	0.3234	0.6978	0.6066	0.5569	0.906	0.7363	0.8294	1	0.1706	0.8269	5.2e-14	1e-15	1	0.7171	1
	1487			2-hydroxypalmitate	LC/MS neg	35675		HMDB31057	92836					0.99	0.99	0.96		1.02	1.03	0.83	1.38	1.01	0.81	1.4	0.81	1.42	1.14		0.81	1.47	1.19		6.7283e-05	1.2742e-06	0.9559	0.8163	0.955	0.6817	0.9011	0.7354	0.9565	1	0.7836	1	0.0299	0.0001	0.8747	0.6907	0.8903
	1490			2-hydroxybehenate	LC/MS neg	57663			193484					0.99	1.07	1.05		0.83	1.42	3.35	0.26	1.71	4.04	0.21	2.37	0.36	0.86		2.57	0.34	0.88		2.6019e-11	9.08e-13	0.5057	0.7062	0.7776	0.6312	0.8983	0.7354	0.6794	1	0.3865	0.9577	3.08e-10	2.33e-12	0.3075	0.3287	0.0401
	1495			3-hydroxyhexanoate	LC/MS neg	53230			151492					0.8	1.5	1.04		1.59	1.4	0.53	1.94	0.88	0.33	3.09	0.38	2.72	1.02		0.7	2.1	1.47		1.5646e-06	3.3825e-08	0.3805	0.6978	0.1676	0.305	0.5239	0.5534	0.0502	1	0.8777	1	0.0005	2.12e-06	0.2358	0.2694	0.3339
	1503			3-hydroxypalmitate	LC/MS neg	27503		HMDB10734	301590					0.96	0.99	1.31		1.23	1.39	1.02	1.33	1.13	0.83	1.64	0.73	1.85	1.35		0.76	1.35	1.02		0.0055	9.1005e-05	0.3179	0.6978	0.2932	0.3964	0.9086	0.7363	0.8181	1	0.0696	0.5961	0.0301	0.0001	0.3576	0.3673	0.2269
	1516			13-HODE + 9-HODE	LC/MS neg	37752			43013					0.88	0.96	1.04		1.34	1.43	1.66	1.7	1.07	1.24	2.28	1.16	2.43	2.81		1.26	2.04	2.58		8.8419e-10	2.5433e-11	0.6616	0.7438	0.9561	0.6817	0.6538	0.6248	0.78	1	0.9757	1	0.0001	4.4e-07	0.1023	0.1354	0.081
	1578		Eicosanoid	prostaglandin F2alpha	LC/MS neg	19398	C00639	HMDB01139	5280363					0.9	1.07	0.86		1.61	3.51	4.08	0.39	2.18	2.53	0.62	1.16	1.36	1.58		1.39	1.42	1.98		9.245e-12	3.55e-13	0.2011	0.6978	0.1208	0.2776	0.1657	0.278	0.3421	1	0.0797	0.6348	2.7e-14	0	4.4258e-05	0.0002	1.28e-13
	1615			5-HETE	LC/MS neg	37372	C04805	HMDB11134	5280733					0.87	0.94	0.98		1.8	3.52	4.92	0.34	1.95	2.73	0.62	1.4	1.21	1.7		1.51	1.08	1.63		0.0008	1.3862e-05	0.7065	0.7587	0.9433	0.6805	0.7496	0.673	0.6968	1	0.9549	1	4.65e-06	2.33e-08	0.0139	0.0236	1.7076e-05
	1621			12-HETE	LC/MS neg	37536		HMDB06111	5312983					0.73	0.96	1.06		2.69	5.97	6.88	0.4	2.22	2.56	1.07	1.15	2.37	2.73		1.51	1.63	2.47		7.2577e-06	1.4718e-07	0.509	0.7062	0.3128	0.4038	0.147	0.2613	0.7043	1	0.4827	0.9577	6.58e-07	3.63e-09	0.0007	0.0017	3.1312e-07
	1623			15-HETE	LC/MS neg	37538	C04742	HMDB02110	5280724					0.87	0.97	1.12		1.75	2.73	4.53	0.42	1.55	2.58	0.73	1.66	1.14	1.9		1.85	0.89	1.64		7.2078e-10	2.1176e-11	0.9147	0.8115	0.318	0.4071	0.3167	0.4092	0.7706	1	0.2691	0.8872	4.43e-10	3.31e-12	0.0004	0.001	9.5394e-08
	1628			5-KETE	LC/MS neg	48465	C14732	HMDB10217	5283159					0.86	0.95	0.83		1.49	2.47	2.91	0.47	1.66	1.96	0.7	1.18	1.16	1.37		1.31	1.21	1.58		0.0088	0.0001	0.3512	0.6978	0.9344	0.6805	0.6361	0.6113	0.7467	1	0.4102	0.9577	0.0005	2.12e-06	0.073	0.1003	0.0007
	1629			15-KETE	LC/MS neg	48467	C04577	HMDB10210	5280701					1	0.96	1.09		1.62	1.71	2.36	0.73	1.05	1.45	1.18	1.38	1.24	1.71		1.33	1.14	1.51		0.0003	5.5984e-06	0.7454	0.7739	0.8272	0.648	0.669	0.6357	0.7544	1	0.6547	0.9955	0.0018	7.44e-06	0.0191	0.0315	0.0197
	1634		Endocannabinoid	oleoyl ethanolamide	LC/MS neg	38102		HMDB02088	5283454					0.8	1.1	1.13		0.86	3.74	13.09	0.06	4.35	15.2	0.05	3.5	0.23	0.8		4.77	0.16	0.77		1.1e-14	1e-15	0.5108	0.7062	0.1116	0.2662	0.2465	0.3518	0.6519	1	0.0691	0.5961	2.75e-11	2.43e-13	0.9305	0.7171	2.5641e-05
	1637			palmitoyl ethanolamide	LC/MS neg	38165	C16512	HMDB02100	4671					0.84	1.04	1.16		0.97	1.46	4.73	0.1	1.5	4.86	0.1	3.25	0.15	0.5		3.99	0.11	0.44		0	0	0.4703	0.7062	0.1287	0.2834	0.369	0.4465	0.867	1	0.0525	0.5075	1.85e-10	1.43e-12	0.9102	0.7107	0.1015
	1638			stearoyl ethanolamide	LC/MS pos late	38625		HMDB13078	27902					0.95	1.01	1.1		1.03	1.37	4.63	0.22	1.33	4.49	0.23	3.38	0.3	1.02		3.62	0.26	0.94		0	0	0.6307	0.74	0.4084	0.4591	0.5332	0.5567	0.8515	1	0.2085	0.8508	1e-15	0	0.7325	0.6179	0.0069
	1642			arachidonoyl ethanolamide	LC/MS pos late	32463	C11695	HMDB04080	5281969					1.01	0.95	1		1	1.02	4.45	0.25	1.02	4.45	0.25	4.35	0.25	1.09		4.07	0.25	1.03		0	0	0.6828	0.7523	0.6783	0.595	0.8893	0.7354	0.343	1	0.9152	1	0	0	1	0.7171	0.7185
	1645			N-arachidonoyltaurine	LC/MS neg	54748								0.64	0.99	1.59		1	5.26	9.14	0.24	5.25	9.12	0.24	1.74	1.28	2.22		2.67	0.52	1.38		0.0013	2.283e-05	0.9553	0.8163	0.0208	0.1868	0.0443	0.1481	0.9334	1	0.0456	0.4815	4.03e-08	2.53e-10	0.9204	0.7152	5.2817e-06
	1652			linoleoyl ethanolamide	LC/MS neg	52608		HMDB12252	5283446					0.79	1.13	1.26		1	3.62	11.08	0.13	3.62	11.08	0.13	3.06	0.47	1.43		4.37	0.29	1.28		2.5995e-08	6.2484e-10	0.4308	0.7062	0.1902	0.322	0.4232	0.4828	0.715	1	0.0767	0.6348	4.9e-09	3.33e-11	1	0.7171	0.0005
	1659			palmitoleoyl ethanolamide	LC/MS pos late	57541		HMDB13648	9835868					0.86	1.01	1.13		1	1.23	2.91	0.3	1.23	2.91	0.3	2.36	0.37	0.87		2.77	0.28	0.78		1.155e-12	4.8e-14	0.9459	0.8163	0.4646	0.4846	0.3751	0.4506	0.8768	1	0.3953	0.9577	1.67e-09	1.18e-11	1	0.7171	0.2319
	1664			N-stearoylserine	LC/MS neg	61822								1	1.13	0.83		1.34	3.59	2.99	0.45	2.68	2.24	0.6	0.83	1.61	1.35		0.95	1.94	1.84		5.7986e-05	1.1012e-06	0.682	0.7523	0.7467	0.6257	0.8684	0.7279	0.4213	1	0.7926	1	0.0001	4.4e-07	0.3394	0.353	4.2323e-05
	1665			N-palmitoylserine	LC/MS neg	57659			6453686					0.86	1.04	1.41		0.91	1.19	3.13	0.14	1.32	3.46	0.13	2.62	0.17	0.44		3.17	0.1	0.33		3.0188e-09	8.2028e-11	0.3353	0.6978	0.4382	0.4742	0.7194	0.6615	0.5667	1	0.1488	0.7763	3.68e-05	1.71e-07	0.7966	0.6517	0.8442
	1667		Inositol Metabolism	myo-inositol	LC/MS polar	1124	C00137	HMDB00211	892					0.85	0.94	1.05		0.97	1.57	3	0.37	1.63	3.1	0.36	1.91	0.58	1.11		2.11	0.47	1		0	0	0.0849	0.6978	0.0484	0.1986	0.0072	0.0666	0.3222	1	0.4384	0.9577	0	0	0.7793	0.644	5.1231e-07
	1668			chiro-inositol	LC/MS polar	37112	C19891	HMDB34220						0.91	0.96	1.05		0.24	0.24	1.06	1.4	0.99	4.42	0.34	4.46	0.33	1.49		4.71	0.29	1.36		0	0	0.8147	0.8002	0.7301	0.6191	0.5336	0.5567	0.7976	1	0.6355	0.9955	3.05e-12	3.1e-14	2.8116e-09	2.6155e-08	2.3306e-10
	1676			inositol 1-phosphate (I1P)	LC/MS polar	43849	C01177	HMDB00213	440194					1	1.17	1.01		0.45	0.2	0.27	0.33	0.45	0.6	0.15	1.33	0.07	0.09		1.55	0.07	0.1		7.489e-12	2.93e-13	0.7012	0.7587	0.9633	0.6817	1	0.7515	0.7342	1	0.7449	1	2.65e-05	1.24e-07	0.0747	0.1013	0.008
	1696		Phospholipid Metabolism	choline	LC/MS pos early	15506	C00114	HMDB00097	305					0.98	0.97	1.01		1.01	1.08	1.37	1.01	1.06	1.35	1.02	1.27	1.08	1.38		1.26	1.05	1.32		1.3147e-09	3.6741e-11	0.8124	0.8002	0.8431	0.6511	0.8007	0.6934	0.633	1	0.7494	1	9.07e-05	4.13e-07	0.7789	0.644	0.2947
	1697			choline phosphate	LC/MS pos early	34396	C00588	HMDB01565	1014					0.93	1	1.01		0.86	0.9	1.09	1.08	1.04	1.26	0.94	1.21	0.97	1.18		1.3	0.9	1.17		1.7294e-10	5.454e-12	0.248	0.6978	0.2242	0.353	0.0417	0.1422	0.9307	1	0.869	1	0.0002	8.7e-07	0.011	0.0196	0.0356
	1698			cytidine 5'-diphosphocholine	LC/MS polar	34418	C00307	HMDB01413	13804					0.78	1	1.02		1.23	1.88	1.77	0.75	1.53	1.44	0.93	0.94	1.41	1.33		1.21	1.08	1.31		2.0093e-05	3.8911e-07	0.0652	0.6978	0.0197	0.1868	0.0012	0.0463	0.9899	1	0.836	1	6.84e-07	3.76e-09	0.0511	0.0733	2.2832e-07
	1700			glycerophosphorylcholine (GPC)	LC/MS pos early	15990	C00670	HMDB00086	71920					0.94	1.03	0.94		0.68	0.26	0.5	0.99	0.39	0.74	0.67	1.9	0.26	0.5		2.07	0.26	0.54		0	0	0.6208	0.74	0.8085	0.6397	0.7915	0.6871	0.8713	1	0.4516	0.9577	1.02e-13	1e-15	0.0015	0.0034	2.77e-13
	1702			phosphoethanolamine	LC/MS neg	1600	C00346	HMDB00224	1015					0.9	1	1.05		1.01	0.9	0.66	1.99	0.89	0.65	2.01	0.73	1.79	1.31		0.82	1.53	1.25		0	0	0.5228	0.7105	0.0807	0.2258	0.0344	0.1274	0.925	1	0.3304	0.9359	1.24e-12	1.3e-14	0.8067	0.655	0.0885
	1703			cytidine-5'-diphosphoethanolamine	LC/MS polar	34410	C00570	HMDB01564	123727					0.84	0.99	1.04		1.04	1.68	1.65	0.88	1.62	1.59	0.91	0.98	1.48	1.45		1.16	1.19	1.37		1.2706e-08	3.1764e-10	0.2182	0.6978	0.0583	0.205	0.0106	0.0759	0.8856	1	0.5081	0.9577	2.08e-07	1.21e-09	0.6407	0.5715	1.4302e-06
	1704			glycerophosphoethanolamine	LC/MS pos early	37455	C01233	HMDB00114	123874					0.99	0.99	0.98		0.89	0.95	1.54	0.46	1.06	1.73	0.41	1.63	0.44	0.71		1.63	0.44	0.72		0	0	0.6482	0.74	0.9835	0.6875	0.8492	0.722	0.8497	1	0.6809	0.9963	0	0	0.0386	0.0576	0.2523
	1705			glycerophosphoserine	LC/MS pos early	57404			3081457					0.82	1.03	0.95		1.37	4.38	4.96	0.2	3.19	3.61	0.27	1.13	0.86	0.97		1.42	0.74	1.06		0.0005	8.887e-06	0.1335	0.6978	0.1378	0.2932	0.021	0.1058	0.6443	1	0.4816	0.9577	0	0	0.003	0.0061	1.5e-14
	1706			glycerophosphoinositol	LC/MS pos early	52307			167572					0.84	1.03	1.05		1.48	2.22	3.4	0.33	1.5	2.3	0.49	1.53	0.74	1.13		1.89	0.59	1.11		1.4e-14	1e-15	0.336	0.6978	0.0222	0.1868	0.0058	0.0655	0.6171	1	0.4624	0.9577	1.2e-14	0	4.6898e-05	0.0002	7.8455e-11
	1707			trimethylamine N-oxide	LC/MS pos early	40406	C01104	HMDB00925	1145					1.19	1.12	0.94		0.83	0.69	1.74	1	0.83	2.09	0.83	2.51	0.69	1.74		2.35	0.88	2.06		8.337e-06	1.6759e-07	0.3598	0.6978	0.7278	0.6191	0.2543	0.3567	0.6942	1	0.9588	1	0.0434	0.0002	0.7135	0.6068	0.3392
	2237		Glycerolipid Metabolism	glycerol	LC/MS neg	15122	C00116	HMDB00131	753					0.99	1.04	0.95		1.15	2.04	3.16	0.41	1.77	2.74	0.47	1.55	0.83	1.29		1.61	0.87	1.4		8.6888e-10	2.5098e-11	0.8958	0.8095	0.7313	0.6191	0.9471	0.7462	0.6334	1	0.5245	0.9577	1.14e-12	1.2e-14	0.1384	0.174	2.1644e-08
	2238			glycerol 3-phosphate	LC/MS pos early	43847	C00093	HMDB00126	754					0.88	0.96	1.08		0.51	0.16	0.12	7.46	0.32	0.24	3.79	0.77	1.21	0.92		0.84	0.98	0.83		0.092	0.0014	0.8212	0.8002	0.656	0.582	0.5146	0.5452	0.7392	1	0.5527	0.9879	8e-15	0	0.0001	0.0004	1.92e-13
	2243			glycerophosphoglycerol	LC/MS pos early	48857	C03274		439964					0.87	1	1.02		1.31	1.15	1.83	0.63	0.87	1.39	0.83	1.59	0.73	1.15		1.83	0.62	1.14		0	0	0.0689	0.6978	0.0165	0.1868	0.0011	0.0463	0.9911	1	0.7673	1	6e-15	0	3.3516e-07	1.8814e-06	0.0009
	2247		Monoacylglycerol	1-palmitoylglycerol (16:0)	LC/MS neg	21127		HMDB31074	14900					0.53	1.14	1.59		0.72	1.01	0.5	2.47	1.4	0.69	1.79	0.49	2.5	1.23		1.06	0.83	0.88		0.8083	0.0123	0.6785	0.7523	0.2985	0.3964	0.3605	0.4377	0.7304	1	0.201	0.8294	0.2429	0.0009	0.5362	0.4984	0.4106
	2251			1-oleoylglycerol (18:1)	LC/MS neg	21184		HMDB11567	5283468					0.55	1.43	1.25		0.28	0.18	0.2	2.96	0.63	0.72	0.83	1.14	0.52	0.6		2.95	0.23	0.68		1.7707e-05	3.4582e-07	0.2918	0.6978	0.4566	0.4827	0.6888	0.6453	0.3285	1	0.2136	0.8508	0.0004	1.72e-06	0.0075	0.0139	1.2464e-05
	2257			1-arachidonylglycerol (20:4)	LC/MS neg	34397	C13857	HMDB11549	5282281					0.96	0.72	1.24		0.8	0.37	1.24	0.7	0.46	1.54	0.56	3.35	0.26	0.87		2.51	0.2	0.5		7.4977e-11	2.466e-12	0.7795	0.7897	0.3426	0.4199	0.8778	0.7304	0.4933	1	0.1901	0.8294	0.002	8.23e-06	0.7093	0.6068	0.0106
	2260			1-docosahexaenoylglycerol (22:6)	LC/MS neg	35153		HMDB11587						0.98	1.16	1.09		0.87	0.79	0.99	1.84	0.91	1.14	1.6	1.25	1.46	1.83		1.48	1.31	1.94		0.0082	0.0001	0.4911	0.7062	0.9167	0.6793	0.9164	0.7371	0.6894	1	0.4908	0.9577	0.3683	0.0014	0.8565	0.6818	0.7226
	2262			2-palmitoylglycerol (16:0)	LC/MS neg	33419		HMDB11533	123409					0.83	1.24	1.57		0.71	0.28	0.42	2.95	0.4	0.6	2.08	1.49	0.83	1.24		2.23	0.44	0.98		0.0051	8.4212e-05	0.2545	0.6978	0.4224	0.4631	0.8199	0.7046	0.5588	1	0.1087	0.7176	0.0036	1.44e-05	0.4965	0.47	0.0008
	2265			2-oleoylglycerol (18:1)	LC/MS neg	21232		HMDB11537	5319879					0.64	1.11	1.39		0.29	0.16	0.35	2.38	0.56	1.2	0.69	2.15	0.38	0.83		3.71	0.18	0.66		1.1621e-09	3.2741e-11	0.6921	0.7584	0.1231	0.2776	0.2084	0.3247	0.7864	1	0.0979	0.6817	1.53e-05	7.33e-08	0.0008	0.0021	4.3377e-07
	2267			2-arachidonoylglycerol (20:4)	LC/MS neg	19266	C13856	HMDB04666	5282280					0.97	1.34	1.37		1.3	1.19	1.71	0.34	0.92	1.32	0.44	1.44	0.4	0.57		1.97	0.28	0.56		9.57e-07	2.0886e-08	0.0686	0.6978	0.6742	0.5947	0.6681	0.6357	0.2676	1	0.0991	0.6817	0.0081	3.2e-05	0.3522	0.364	0.7656
	2269			2-docosahexaenoylglycerol (22:6)	LC/MS neg	48675		HMDB11557						0.71	1.06	0.86		1	1.11	1.43	1.45	1.12	1.44	1.44	1.29	1.61	2.07		1.93	1.33	2.56		0.0003	4.6448e-06	0.3619	0.6978	0.4134	0.4591	0.1171	0.2323	0.8348	1	0.8394	1	0.1363	0.0005	0.8684	0.6894	0.6848
	2352		Sphingolipid Metabolism	sphinganine	LC/MS pos late	17769	C00836	HMDB00269	3126					0.96	0.98	1.14		1.76	4.4	10.71	0.16	2.5	6.08	0.29	2.44	0.72	1.76		2.5	0.61	1.52		0	0	0.5387	0.7155	0.1254	0.2801	0.4613	0.5034	0.8232	1	0.0482	0.4867	0	0	6.7551e-08	4.7659e-07	0
	2390			sphingosine	LC/MS pos late	17747	C00319	HMDB00252	5353955					0.96	1.01	1.08		1.23	4.51	10.55	0.08	3.68	8.61	0.1	2.34	0.37	0.87		2.46	0.33	0.82		0	0	0.633	0.74	0.2818	0.3904	0.4069	0.469	0.8245	1	0.1557	0.7855	0	0	0.0123	0.0215	0
	2391			sphingosine 1-phosphate	LC/MS pos late	34445	C06124	HMDB00277	5283560					0.86	1	1.43		1.03	1.47	1.34	0.2	1.43	1.3	0.21	0.91	0.3	0.27		1.05	0.18	0.19		0	0	0.4046	0.7041	0.0217	0.1868	0.2316	0.3426	0.9157	1	0.0085	0.2499	4.2e-14	1e-15	0.8027	0.6533	0.0026
	2393			phytosphingosine	LC/MS pos late	1510	C12144	HMDB04610	122121					1.21	1.06	0.99		1.02	3.01	7.04	0.17	2.94	6.87	0.17	2.34	0.5	1.18		2.05	0.61	1.26		4.2641e-11	1.451e-12	0.1844	0.6978	0.4556	0.4827	0.0876	0.1965	0.5552	1	0.9941	1	0	0	0.8543	0.6818	9.6558e-10
	2411			sphingadienine	LC/MS pos late	57426			6449795					0.9	1.03	1.04		2.82	8.82	13.92	0.08	3.13	4.94	0.23	1.58	0.71	1.12		1.8	0.62	1.11		1.97e-13	9e-15	0.7087	0.759	0.2389	0.3666	0.1131	0.2287	0.6866	1	0.5754	0.9955	0	0	9.4147e-11	1.6133e-09	0
	2451			eicosanoylsphingosine (d20:1)	LC/MS pos late	57597								0.88	1.01	0.98		1.24	11.5	22.32	0.04	9.28	18.01	0.05	1.94	0.5	0.96		2.21	0.45	0.99		0	0	0.1417	0.6978	0.2345	0.3638	0.0329	0.1274	0.8558	1	0.5747	0.9955	0	0	0.035	0.0525	0
	2489		Mevalonate Metabolism	3-hydroxy-3-methylglutarate	LC/MS polar	531	C03761	HMDB00355	1662					0.84	1	1.07		1.86	1.53	0.92	2.49	0.82	0.5	4.64	0.6	3.82	2.31		0.72	3.01	2.15		0	0	0.4379	0.7062	0.0738	0.2199	0.027	0.1136	0.9964	1	0.3475	0.9359	7.6e-14	1e-15	3.3495e-06	1.6276e-05	0.0002
	2503		Sterol	desmosterol	LC/MS pos late	6065	C01802	HMDB02719	439577					0.97	0.96	1.1		1.68	0.88	0.52	2.91	0.52	0.31	4.88	0.59	2.56	1.51		0.59	2.26	1.33		0	0	0.7754	0.7877	0.3603	0.4294	0.6904	0.6453	0.6558	1	0.1858	0.8294	5.8e-14	1e-15	5.202e-05	0.0002	0.2732
	2504			cholesterol	LC/MS pos late	63	C00187	HMDB00067	11025495					0.9	1.02	1.1		1.32	4	7.54	0.14	3.03	5.71	0.19	1.88	0.57	1.07		2.14	0.46	0.99		0	0	0.962	0.8163	0.0542	0.2036	0.0598	0.1716	0.774	1	0.1248	0.7427	0	0	0.0016	0.0037	0
	2527			4-cholesten-3-one	LC/MS pos late	38125	C00599	HMDB00921	91477					1.16	1.01	0.95		0.86	1.16	1.18	1.33	1.34	1.37	1.15	1.02	1.54	1.57		0.89	1.89	1.68		4.0099e-08	9.5058e-10	0.6525	0.74	0.4122	0.4591	0.1993	0.3177	0.9708	1	0.5803	0.9955	0.0001	4.4e-07	0.183	0.2207	0.181
	2528			beta-sitosterol	LC/MS pos late	27414	C01753	HMDB00852	222284					1	1.13	1.49		0.56	0.56	0.71	0.47	1	1.25	0.27	1.25	0.27	0.33		1.41	0.18	0.25		3.116e-12	1.25e-13	0.2135	0.6978	0.593	0.5493	1	0.7515	0.4658	1	0.154	0.7854	1.98e-07	1.16e-09	0.0415	0.0609	0.0287
	2530			campesterol	LC/MS pos late	33997	C01789	HMDB02869	173183					0.98	0.34	1.38		1	1.21	4.12	0.12	1.21	4.12	0.12	3.41	0.15	0.5		1.2	0.1	0.13		3e-15	0	0.0307	0.6978	0.0001	0.0182	0.9138	0.7371	8.9887e-06	0.0041	0.1755	0.8294	2.73e-12	2.8e-14	1	0.7171	0.4539
	2547			7-hydroxycholesterol (alpha or beta)	LC/MS pos late	47890		HMDB06119	107722					1.18	1	0.95		1.13	1.73	1.2	0.99	1.54	1.07	1.11	0.69	1.71	1.19		0.59	2.12	1.25		8.0642e-06	1.6258e-07	0.4735	0.7062	0.3647	0.4311	0.1236	0.2402	0.989	1	0.7389	1	0.0526	0.0002	0.5414	0.5001	0.0125
	2600		Corticosteroids	corticosterone	LC/MS neg	5983	C02140	HMDB01547	5753					3.02	2.33	1.05		0.95	1.29	2.29	0.81	1.36	2.41	0.77	1.77	1.04	1.85		1.37	2.98	4.09		0.0028	4.7988e-05	0.0049	0.6141	0.1472	0.2936	0.0092	0.0728	0.0254	1	0.9152	1	0.04	0.0002	0.856	0.6818	0.3289
	2695		Primary Bile Acid Metabolism	cholate	LC/MS neg	22842	C00695	HMDB00619	221493					1	1.17	1.17		1	1	9.86	0.78	1	9.86	0.78	9.86	0.78	7.67		11.53	0.67	7.68		0	0	0.5477	0.7197	0.8974	0.6736	1	0.7515	0.5173	1	0.6934	0.9963	0	0	1	0.7171	1
	3317	Nucleotide	Purine Metabolism, (Hypo)Xanthine/Inosine containing	AICA ribonucleotide	LC/MS pos early	38325	C04677	HMDB01517	65110					0.91	0.93	1.12		1	1.1	3.04	0.77	1.1	3.04	0.77	2.76	0.85	2.35		2.83	0.69	1.95		6.7795e-10	2.0089e-11	0.7391	0.771	0.5062	0.499	0.5883	0.5851	0.4332	1	0.4536	0.9577	1.92e-09	1.34e-11	1	0.7171	0.4889
	3320			inosine 5'-monophosphate (IMP)	LC/MS polar	2133	C00130	HMDB00175	8582					0.83	2.37	1		1.27	1.21	0.01	213.69	0.95	0.01	271.88	0.01	257.5	2.22		0.02	213.89	5.25		0	0	0.1784	0.6978	0.0641	0.2102	0.6975	0.649	0.0088	1	1	1	0	0	0.2764	0.3009	0.5693
	3321			inosine	LC/MS neg	1123	C00294	HMDB00195	6021					0.96	1.04	1		0.85	0.93	1.69	0.74	1.09	1.98	0.63	1.82	0.68	1.25		1.98	0.66	1.31		2e-14	1e-15	0.8968	0.8095	0.6956	0.6042	0.5693	0.5777	0.5367	1	0.8605	1	4.54e-08	2.83e-10	0.1241	0.1584	0.4366
	3322			hypoxanthine	LC/MS neg	3127	C00262	HMDB00157	790					0.83	0.97	1		1.25	3.06	3.28	0.38	2.45	2.63	0.48	1.07	1.17	1.25		1.25	0.98	1.22		0.0015	2.7148e-05	0.104	0.6978	0.2453	0.3666	0.0242	0.1101	0.7051	1	0.8781	1	0	0	0.0055	0.0105	2e-15
	3323			xanthine	LC/MS pos early	3147	C00385	HMDB00292	1188					0.91	1.02	1.05		1.02	3.2	6.32	0.21	3.13	6.19	0.21	1.97	0.67	1.33		2.22	0.58	1.3		0	0	0.7263	0.7647	0.1432	0.2936	0.0743	0.1772	0.6956	1	0.4104	0.9577	0	0	0.7144	0.6068	4e-15
	3325			xanthosine	LC/MS neg	15136	C01762	HMDB00299	64959					1.04	0.98	0.97		0.72	0.51	2.11	0.41	0.71	2.93	0.3	4.15	0.21	0.87		3.89	0.23	0.88		0	0	0.8867	0.8095	0.9025	0.6736	0.7756	0.686	0.7806	1	0.8001	1	0	0	0.0033	0.0067	1.4399e-07
	3328			N1-methylinosine	LC/MS pos early	48351		HMDB02721	65095					1.02	0.83	1		0.57	0.34	0.16	7.62	0.6	0.28	4.36	0.47	2.6	1.22		0.38	2.66	1.02		0	0	0.2742	0.6978	0.3096	0.4013	0.991	0.7515	0.0639	1	1	1	0	0	3.5406e-05	0.0001	9.0148e-11
	3329			2'-deoxyinosine	LC/MS neg	15076	C05512	HMDB00071	65058					0.91	0.99	0.98		0.73	0.54	0.8	1.8	0.74	1.09	1.32	1.47	0.98	1.44		1.6	0.91	1.45		1.5808e-08	3.8952e-10	0.5115	0.7062	0.785	0.6339	0.3471	0.4275	0.9329	1	0.9122	1	2.89e-06	1.48e-08	0.0071	0.0132	1.3341e-06
	3331			urate	LC/MS neg	1604	C00366	HMDB00289	1175					1.15	0.96	0.98		0.94	1.28	2.2	0.46	1.37	2.35	0.43	1.72	0.58	1		1.44	0.68	0.99		1.5933e-05	3.1207e-07	0.6186	0.74	0.6207	0.5622	0.2818	0.3831	0.9211	1	0.9026	1	2.87e-05	1.34e-07	0.8847	0.6958	0.2138
	3333			allantoin	LC/MS polar	1107	C02350	HMDB00462	204					0.9	0.95	0.94		0.38	0.3	0.13	16.19	0.79	0.33	6.17	0.42	4.87	2.05		0.45	4.65	2.07		0	0	0.2273	0.6978	0.9118	0.6789	0.3254	0.4162	0.6982	1	0.4645	0.9577	0	0	4.8389e-08	3.501e-07	1.5025e-10
	3339		Purine Metabolism, Adenine containing	adenosine 5'-monophosphate (AMP)	LC/MS pos early	32342	C00020	HMDB00045	6083					0.78	1.05	1.08		0.94	0.14	0.04	36.55	0.15	0.04	34.32	0.27	5.12	1.4		0.37	3.71	1.36		1e-15	0	0.7405	0.771	0.2698	0.3827	0.1334	0.246	0.6946	1	0.5779	0.9955	0	0	0.7034	0.6059	1.27e-13
	3340			adenosine 3'-monophosphate (3'-AMP)	LC/MS neg	35142	C01367	HMDB03540	41211					0.9	0.93	0.94		0.83	1.08	1.7	0.57	1.3	2.05	0.47	1.58	0.61	0.97		1.63	0.59	0.95		7.0646e-10	2.0844e-11	0.1751	0.6978	0.9432	0.6805	0.2976	0.3951	0.4507	1	0.5678	0.9955	2.99e-07	1.71e-09	0.1457	0.1811	0.5544
	3341			adenosine 2'-monophosphate (2'-AMP)	LC/MS neg	36815	C00946	HMDB11617	94136					1.06	0.96	0.98		0.8	1.5	1.73	0.59	1.86	2.16	0.48	1.16	0.89	1.03		1.05	0.95	1		0.3933	0.006	0.8324	0.8004	0.7972	0.6367	0.5089	0.5425	0.8219	1	0.9436	1	1.64e-05	7.81e-08	0.1675	0.2051	0.0081
	3344			adenosine 3',5'-diphosphate	LC/MS neg	15691	C00054	HMDB00061	159296					1.02	0.84	1.19		1	1	1.48	0.23	1	1.48	0.23	1.48	0.23	0.34		1.22	0.2	0.24		0	0	0.7895	0.7913	0.1835	0.3158	0.8997	0.7354	0.2522	1	0.1417	0.7763	2.8e-12	2.8e-14	1	0.7171	1
	3345			adenylosuccinate	LC/MS neg	57838	C03794	HMDB00536	195					1	1	1		1.05	0.24	0.24	4.12	0.23	0.23	4.35	1	1	1		1	1	1		1	0.0151	1	0.8279	1	0.6937	1	0.7515	1	1	1	1	7.92e-13	9e-15	0.7504	0.628	1.843e-10
	3346			adenosine	LC/MS pos early	555	C00212	HMDB00050	60961					1.14	1.06	1.47		1.03	0.47	0.21	1.58	0.46	0.2	1.62	0.44	0.74	0.33		0.41	0.58	0.24		5.6637e-09	1.4918e-10	0.195	0.6978	0.6735	0.5947	0.6069	0.5967	0.7749	1	0.1475	0.7763	1.06e-09	7.65e-12	0.913	0.7112	7.5965e-05
	3347			adenine	LC/MS pos early	554	C00147	HMDB00034	190					0.72	0.98	1.02		1.08	1.41	3.9	0.13	1.31	3.62	0.14	2.76	0.18	0.5		3.74	0.13	0.47		0	0	0.0282	0.6978	0.0089	0.15	0.0003	0.0463	0.7888	1	0.7724	1	0	0	0.3231	0.3393	0.0001
	3352			N1-methyladenosine	LC/MS pos early	15650	C02494	HMDB03331	27476					0.78	1	1.06		0.75	0.85	1.05	1.49	1.14	1.41	1.11	1.24	1.26	1.56		1.58	0.93	1.47		4.2201e-07	9.5748e-09	0.2426	0.6978	0.0732	0.2199	0.0136	0.0831	0.9936	1	0.5879	0.9955	0.0005	2.12e-06	0.0199	0.0323	0.1449
	3353			N6-methyladenosine	LC/MS pos early	37114		HMDB04044	1869					0.84	1.04	1.05		0.84	1.1	2.99	0.82	1.31	3.57	0.69	2.72	0.9	2.46		3.38	0.72	2.42		1.8e-14	1e-15	0.8581	0.8095	0.4098	0.4591	0.2356	0.3435	0.6997	1	0.6164	0.9955	3.33e-08	2.1e-10	0.3893	0.3925	0.5533
	3362			N6-carbamoylthreonyladenosine	LC/MS neg	35157		HMDB41623	161466					0.94	0.98	1		0.38	0.24	0.3	4.35	0.62	0.79	1.64	1.27	1.02	1.3		1.32	0.97	1.28		8.9377e-05	1.6834e-06	0.6531	0.74	0.9337	0.6805	0.5784	0.5821	0.8794	1	0.9434	1	2.06e-13	3e-15	1.9141e-09	1.8885e-08	6.2e-14
	3371			N6-succinyladenosine	LC/MS neg	48130		HMDB00912	165243					0.89	0.96	0.95		0.86	0.49	0.52	3.12	0.58	0.61	2.68	1.05	1.55	1.62		1.13	1.45	1.64		5.0636e-08	1.1921e-09	0.255	0.6978	0.7418	0.6247	0.2053	0.3217	0.6468	1	0.8026	1	4.01e-11	3.47e-13	0.1798	0.2176	2.2137e-07
	3373		Purine Metabolism, Guanine containing	guanosine 5'- diphosphate (GDP)	LC/MS neg	2848	C00035	HMDB01201	8977					0.83	1.23	0.81		0.56	1.12	0.4	1.98	2.01	0.72	1.11	0.36	2.23	0.8		0.53	2.29	1.21		2.71e-09	7.3929e-11	0.6285	0.74	0.1008	0.2539	0.2343	0.3434	0.1361	1	0.2537	0.8797	1.06e-06	5.75e-09	0.0055	0.0105	0.4973
	3374			guanosine 5'- monophosphate (5'-GMP)	LC/MS pos early	2849	C00144	HMDB01397	6804					0.78	1.28	1.05		1.1	0.61	0.03	65.31	0.55	0.02	72.11	0.05	39.72	1.79		0.07	29.51	2.2		0	0	0.7049	0.7587	0.0387	0.1986	0.0775	0.1813	0.0641	1	0.5731	0.9955	0	0	0.5185	0.4879	0.0016
	3379			guanosine	LC/MS neg	1573	C00387	HMDB00133	6802					0.88	1.07	1.12		0.92	0.75	0.17	11.58	0.81	0.18	10.65	0.22	8.68	1.92		0.27	6.84	1.84		0	0	0.6197	0.74	0.2146	0.3449	0.2549	0.3567	0.4203	1	0.2347	0.8734	0	0	0.5232	0.4896	0.0183
	3380			guanine	LC/MS pos early	32352	C00242	HMDB00132	764					0.97	1	1.09		0.47	0.2	0.11	14.85	0.43	0.22	7.05	0.52	3.03	1.58		0.54	2.68	1.45		1.4e-14	1e-15	0.8011	0.7969	0.6481	0.5798	0.7042	0.6519	0.9467	1	0.3796	0.9577	0	0	3.9785e-07	2.1955e-06	1.2e-14
	3382			7-methylguanine	LC/MS pos early	35114	C02242	HMDB00897	11361					0.93	0.98	1.04		0.5	0.38	0.22	7.88	0.77	0.44	3.92	0.57	3.03	1.72		0.6	2.73	1.64		0	0	0.7133	0.7617	0.7552	0.6259	0.4482	0.4981	0.8668	1	0.7702	1	0	0	9.6569e-08	6.4165e-07	4.0369e-11
	3388			N2,N2-dimethylguanosine	LC/MS pos early	35137		HMDB04824	92919					0.94	0.93	0.93		0.41	0.3	0.31	6.59	0.75	0.75	2.68	1	2.01	2.02		1	2.03	2.02		5.5636e-11	1.848e-12	0.2472	0.6978	0.9443	0.6805	0.5575	0.5711	0.6233	1	0.3484	0.9359	2.5e-14	0	3.025e-08	2.2384e-07	1.8775e-11
	3401		Pyrimidine Metabolism, Orotate containing	orotate	LC/MS polar	1505	C00295	HMDB00226	967					0.91	1.07	1.08		0.9	0.48	0.5	3.23	0.53	0.55	2.91	1.04	1.55	1.61		1.22	1.31	1.6		9.2064e-08	2.1528e-09	0.887	0.8095	0.3518	0.4245	0.2737	0.3781	0.5513	1	0.4535	0.9577	3.21e-12	3.2e-14	0.3788	0.383	3.6653e-08
	3403			orotidine	LC/MS polar	35172		HMDB00788	92751					0.82	1.03	1.14		0.74	0.49	0.27	10.34	0.65	0.36	7.68	0.55	5.03	2.74		0.68	3.64	2.48		0	0	0.8599	0.8095	0.091	0.2389	0.0691	0.1745	0.7473	1	0.2225	0.8513	0	0	0.0275	0.0429	2.0079e-06
	3408		Pyrimidine Metabolism, Uracil containing	uridine 5'-monophosphate (UMP)	LC/MS pos early	2856	C00105	HMDB00288	6030					0.78	1.67	1		0.69	0.17	0.01	297.35	0.24	0.01	205.95	0.05	50.39	2.35		0.1	39.27	3.93		0	0	0.2023	0.6978	0.005	0.1309	0.2128	0.33	0.0012	0.2718	1	1	0	0	0.0819	0.1105	2.0336e-10
	3412			uridine-2',3'-cyclic monophosphate	LC/MS neg	37137	C02355	HMDB11640	439715					0.73	0.99	1.12		0.1	0.05	0.07	31.54	0.56	0.73	3.08	1.31	1.73	2.26		1.79	1.12	2		0.0003	5.5412e-06	0.9009	0.8095	0.5139	0.5042	0.4003	0.4661	0.8773	1	0.435	0.9577	1.28e-11	1.17e-13	2.4552e-08	1.859e-07	2.265e-11
	3413			uridine	LC/MS neg	606	C00299	HMDB00296	6029					0.89	1	0.95		0.81	0.87	0.9	1.44	1.07	1.11	1.17	1.04	1.25	1.3		1.17	1.17	1.37		3.8526e-06	8.1243e-08	0.1925	0.6978	0.5012	0.4986	0.1133	0.2287	0.9572	1	0.4693	0.9577	0.0033	1.33e-05	0.0414	0.0609	0.1238
	3414			uracil	LC/MS polar	605	C00106	HMDB00300	1174					0.83	0.97	1.05		1.16	2.91	4.06	0.4	2.51	3.51	0.46	1.4	1.15	1.61		1.63	0.92	1.49		2.2091e-07	5.0622e-09	0.3097	0.6978	0.2468	0.3666	0.062	0.1738	0.7785	1	0.6733	0.9963	2.52e-13	3e-15	0.205	0.2401	1.292e-10
	3415			pseudouridine	LC/MS pos early	33442	C02067	HMDB00767	15047					0.9	1.01	1.02		0.49	0.47	0.42	3.75	0.96	0.84	1.85	0.87	1.78	1.56		0.99	1.56	1.54		1.61e-13	8e-15	0.632	0.74	0.2735	0.3828	0.1161	0.2317	0.7941	1	0.6127	0.9955	1.42e-12	1.5e-14	8.6918e-08	5.8956e-07	7.4285e-09
	3416			5,6-dihydrouridine	LC/MS neg	61833			94312					0.93	1.12	1.04		0.47	0.36	0.32	4.67	0.76	0.68	2.2	0.89	1.66	1.48		1.07	1.49	1.6		0.0018	3.043e-05	0.5063	0.7062	0.4598	0.4827	0.6422	0.6155	0.1985	1	0.7499	1	2.42e-06	1.26e-08	0.0042	0.0081	7.3754e-05
	3418			5-methyluridine (ribothymidine)	LC/MS neg	35136		HMDB00884	445408					0.82	1.05	1		0.52	0.39	0.56	5.35	0.74	1.08	2.8	1.45	2.08	3.01		1.86	1.7	3.15		0	0	0.3546	0.6978	0.1655	0.305	0.0423	0.1429	0.6336	1	1	1	3.17e-13	4e-15	9.5183e-06	4.132e-05	2.6609e-09
	3429			2'-deoxyuridine	LC/MS neg	52602	C00526	HMDB00012	13712					0.93	0.94	1.01		2.58	3.29	3.11	0.58	1.27	1.21	1.5	0.95	1.91	1.8		0.95	1.77	1.68		3e-15	0	0.281	0.6978	0.7232	0.6191	0.2893	0.387	0.41	1	0.9893	1	4.94e-11	4.2e-13	7.5684e-09	6.6598e-08	1.7479e-11
	3432			3-ureidopropionate	LC/MS pos early	3155	C02642	HMDB00026	111					1.11	1.06	1.11		0.29	0.21	0.16	16.44	0.7	0.56	4.83	0.79	3.39	2.69		0.75	3.39	2.55		5.3995e-11	1.802e-12	0.4245	0.7062	0.9913	0.6892	0.619	0.5999	0.7206	1	0.5946	0.9955	1.17e-13	1e-15	5.8849e-07	3.0904e-06	9.1432e-10
	3439		Pyrimidine Metabolism, Cytidine containing	cytidine 5'-monophosphate (5'-CMP)	LC/MS pos early	2372	C00055	HMDB00095	6131					0.92	1.08	1.1		0.73	0.5	0.39	5.4	0.69	0.54	3.95	0.78	2.72	2.12		0.92	2.26	2.08		0	0	0.3838	0.6978	0.0612	0.205	0.1438	0.2569	0.1692	1	0.1144	0.7176	0	0	0.0003	0.0007	1.6201e-10
	3442			cytidine 2',3'-cyclic monophosphate	LC/MS polar	37465	C02354	HMDB11691	417654					0.86	1	1.34		0.23	0.19	0.27	9.63	0.84	1.14	2.24	1.36	1.87	2.56		1.58	1.2	1.9		1.012e-08	2.5766e-10	0.3837	0.6978	0.1205	0.2776	0.474	0.5134	0.9416	1	0.0361	0.4166	8.26e-12	7.7e-14	1.3222e-08	1.0762e-07	1.4605e-10
	3443			cytidine	LC/MS pos early	514	C00475	HMDB00089	6175					0.91	0.98	1.06		0.83	0.96	1.15	1.36	1.16	1.38	1.13	1.19	1.31	1.56		1.28	1.13	1.45		5.409e-12	2.12e-13	0.4916	0.7062	0.1423	0.2936	0.0771	0.1813	0.6676	1	0.3009	0.9286	6.91e-07	3.79e-09	0.0156	0.0264	0.631
	3444			cytosine	LC/MS pos early	573	C00380	HMDB00630	597					1.17	1	1.39		0.64	0.22	0.35	15.13	0.34	0.55	9.67	1.59	3.32	5.28		1.36	2.81	3.83		1.8e-14	1e-15	0.1141	0.6978	0.5387	0.5157	0.2345	0.3434	0.9677	1	0.1288	0.7427	1e-14	0	0.0164	0.0276	2.8778e-10
	3445			3-methylcytidine	LC/MS pos early	35132			159649					0.91	0.92	1.05		0.98	2.06	6.35	0.2	2.11	6.48	0.19	3.08	0.41	1.25		3.12	0.35	1.09		0	0	0.2411	0.6978	0.2654	0.3799	0.15	0.2643	0.2177	1	0.5129	0.9577	0	0	0.8761	0.6907	3.4099e-10
	3446			5-methylcytidine	LC/MS pos early	22119		HMDB00982	92918					0.91	1.05	1.06		0.93	1.44	1.51	1.56	1.56	1.63	1.45	1.05	2.25	2.35		1.2	1.93	2.33		0	0	0.8945	0.8095	0.3318	0.4131	0.2561	0.3567	0.5125	1	0.4738	0.9577	6.39e-11	5.38e-13	0.4905	0.4656	0.0002
	3447			N4-acetylcytidine	LC/MS pos early	35130		HMDB05923	107461					1.59	1	1		0.21	0.14	0.12	8.27	0.66	0.59	1.74	0.9	1.14	1.03		0.57	1.82	1.03		0.0019	3.342e-05	0.0645	0.6978	0.0382	0.1986	0.0023	0.0463	0.9861	1	1	1	1e-15	0	2.009e-12	5.4494e-11	1e-15
	3451			2'-deoxycytidine 5'-monophosphate	LC/MS pos early	533	C00239	HMDB01202	13945					0.83	1.02	1.08		0.67	0.97	2.31	0.73	1.44	3.45	0.49	2.39	0.7	1.68		2.96	0.54	1.6		0	0	0.4617	0.7062	0.0574	0.205	0.0207	0.1058	0.8358	1	0.3626	0.9359	4.9e-14	1e-15	5.7194e-05	0.0002	0.6499
	3453			2'-deoxycytidine	LC/MS pos early	15949	C00881	HMDB00014	13711					0.87	1.05	1.07		1.44	1.86	1.86	1.51	1.29	1.29	2.18	1	2.82	2.81		1.2	2.29	2.75		0	0	0.8207	0.8002	0.0531	0.2036	0.0353	0.1274	0.4508	1	0.3098	0.9311	8.3e-14	1e-15	0.0002	0.0005	2.0399e-08
	3454			2'-O-methylcytidine	LC/MS pos early	57554			150971					0.65	1.15	0.92		0.78	0.34	0.23	4.71	0.43	0.3	3.65	0.68	1.59	1.08		1.2	1.13	1.35		0.0809	0.0013	0.2851	0.6978	0.2101	0.3428	0.0576	0.1716	0.5634	1	0.6191	0.9955	5.73e-09	3.85e-11	0.2265	0.2624	5.7781e-06
	3455			5-methyl-2'-deoxycytidine	LC/MS pos early	38159	C03592	HMDB02224	440055					0.92	1.06	1.33		1.2	1.11	2	2.49	0.93	1.67	2.98	1.79	2.78	4.98		2.07	1.92	3.97		0	0	0.0631	0.6978	0.0213	0.1868	0.4335	0.4897	0.4311	1	0.0021	0.1185	1.36e-11	1.23e-13	0.2026	0.239	0.4038
	3463		Pyrimidine Metabolism, Thymine containing	thymidine	LC/MS neg	2183	C00214	HMDB00273	5789					0.92	1	0.98		0.93	0.92	0.76	2.6	0.99	0.82	2.42	0.82	2.4	1.97		0.9	2.26	2.02		0	0	0.3513	0.6978	0.4951	0.498	0.152	0.266	0.8388	1	0.7083	0.9963	8.3e-12	7.7e-14	0.5493	0.5023	0.4809
	3467			3-aminoisobutyrate	LC/MS pos early	1566	C05145	HMDB03911	64956					1	0.88	1.39		0.63	1.58	2.39	1	2.51	3.81	0.63	1.52	1.58	2.39		1.34	1.13	1.51		0.0042	6.99e-05	0.5853	0.7383	0.5245	0.5098	0.9284	0.7383	0.7249	1	0.2312	0.8716	0.0027	1.09e-05	0.1913	0.2281	0.3653
	3468		Purine and Pyrimidine Metabolism	methylphosphate	LC/MS polar	37070		HMDB61711	13130					0.69	0.99	1.17		0.92	1.96	3.09	0.31	2.12	3.34	0.28	1.58	0.6	0.95		2.26	0.36	0.8		1.1546e-09	3.2664e-11	0.2868	0.6978	0.0156	0.1868	0.0045	0.0534	0.9889	1	0.2501	0.8797	1.03e-10	8.33e-13	0.5473	0.5023	3.7528e-05
	3476	Cofactors and Vitamins	Nicotinate and Nicotinamide Metabolism	nicotinamide	LC/MS pos early	594	C00153	HMDB01406	936					0.9	1	1.07		1.15	1.78	2.27	0.55	1.54	1.97	0.63	1.28	0.98	1.25		1.43	0.82	1.17		1.8242e-08	4.4472e-10	0.6311	0.74	0.0857	0.2346	0.0505	0.1565	0.9999	1	0.2437	0.8797	1.92e-13	2e-15	0.0303	0.0465	2.3711e-10
	3479			nicotinamide riboside	LC/MS pos early	33013	C03150	HMDB00855	439924					0.74	1.03	1.18		0.27	0.57	0.57	2.27	2.12	2.12	0.61	1	1.3	1.3		1.39	0.82	1.14		0.235	0.0036	0.881	0.8095	0.2429	0.3666	0.1503	0.2643	0.6855	1	0.4288	0.9577	8.15e-05	3.73e-07	3.5515e-06	1.7004e-05	0.0118
	3480			nicotinamide adenine dinucleotide (NAD+)	LC/MS neg	5278	C00003	HMDB00902	5893					0.86	0.97	1.05		0.6	0.85	1.2	0.92	1.42	2	0.56	1.41	0.79	1.11		1.58	0.65	1.03		1.3482e-09	3.7524e-11	0.2321	0.6978	0.1096	0.2642	0.0232	0.1101	0.7082	1	0.5237	0.9577	9.67e-10	7.04e-12	1.4741e-07	9.4105e-07	0.0271
	3488			1-methylnicotinamide	LC/MS pos early	27665	C02918	HMDB00699	10129985					0.78	1.01	0.97		0.68	5.49	2.97	0.55	8.05	4.35	0.37	0.54	3	1.62		0.7	2.42	1.7		0	0	0.0571	0.6978	0.0601	0.205	0.0036	0.0473	0.8663	1	0.6499	0.9955	2.51e-13	3e-15	0.0742	0.1011	3.478e-12
	3493			trigonelline (N'-methylnicotinate)	LC/MS pos early	32401	C01004	HMDB00875	5570					0.87	1.05	1.12		0.28	0.28	1.53	1.59	1.02	5.56	0.44	5.48	0.44	2.43		6.6	0.35	2.29		0	0	0.8909	0.8095	0.2431	0.3666	0.2009	0.3188	0.5675	1	0.341	0.9359	5.9e-14	1e-15	1.4434e-09	1.5664e-08	2.9385e-10
	3495			N1-Methyl-2-pyridone-5-carboxamide	LC/MS neg	40469	C05842	HMDB04193	69698					1.01	1	1		0.46	0.21	0.49	5.03	0.46	1.08	2.31	2.35	1.06	2.48		2.33	1.07	2.49		0.0036	6.1167e-05	0.5911	0.74	0.6813	0.596	0.9925	0.7515	0.3095	1	0.9348	1	0.0005	2.12e-06	0.0257	0.0404	9.4823e-05
	3496			N1-Methyl-4-pyridone-3-carboxamide	LC/MS pos early	57584	C05843	HMDB04194	440810					1.22	0.85	1.89		24.67	0.07	7.26	4.97	0	0.29	122.65	102.45	0.35	36.1		71.61	0.23	16.26		0.0127	0.0002	0.681	0.7523	0.9555	0.6817	0.8765	0.7304	0.9369	1	0.6329	0.9955	0.0005	2.12e-06	0.0408	0.0606	0.0144
	3500		Riboflavin Metabolism	riboflavin (Vitamin B2)	LC/MS neg	1827	C00255	HMDB00244	493570					0.95	0.97	0.99		0.99	0.96	1.58	0.76	0.97	1.6	0.75	1.64	0.73	1.2		1.67	0.7	1.17		2.5876e-11	9.08e-13	0.5477	0.7197	0.8839	0.6694	0.4689	0.5094	0.7808	1	0.9692	1	1.21e-06	6.53e-09	0.8917	0.6979	0.6061
	3501			flavin adenine dinucleotide (FAD)	LC/MS neg	2134	C00016	HMDB01248	643975					0.92	1	1.01		1.06	1.66	2.31	0.57	1.57	2.18	0.61	1.39	0.95	1.32		1.51	0.87	1.31		3.9582e-10	1.204e-11	0.4979	0.7062	0.527	0.5107	0.1945	0.3145	0.9826	1	0.8753	1	1.37e-11	1.23e-13	0.412	0.4102	1.9282e-07
	3502			flavin mononucleotide (FMN)	LC/MS neg	15797	C00061	HMDB01520	710					0.87	0.96	0.96		1.36	3.48	7.14	0.2	2.57	5.27	0.27	2.05	0.69	1.42		2.27	0.63	1.42		1.68e-13	8e-15	0.2502	0.6978	0.6452	0.5789	0.1598	0.2739	0.6971	1	0.8454	1	2e-15	0	0.0249	0.0394	7.8485e-11
	3503		Pantothenate and CoA Metabolism	pantothenate	LC/MS pos early	1508	C00864	HMDB00210	6613					0.86	1	1.1		0.54	0.44	0.33	3.23	0.81	0.61	1.76	0.75	1.42	1.06		0.87	1.11	0.97		0.0007	1.3329e-05	0.6388	0.74	0.116	0.2741	0.0652	0.1738	0.9951	1	0.2838	0.9009	3.09e-13	4e-15	2.2991e-07	1.3862e-06	1.4149e-10
	3505			phosphopantetheine	LC/MS neg	15504	C01134	HMDB01416	987					0.71	0.95	1.1		1.81	8.73	18.31	0.07	4.81	10.09	0.13	2.1	0.65	1.35		2.8	0.42	1.16		1.596e-12	6.6e-14	0.125	0.6978	0.0146	0.1868	0.0022	0.0463	0.6722	1	0.3257	0.9358	0	0	0.0003	0.0009	1e-14
	3506			3'-dephosphocoenzyme A	LC/MS neg	18289	C00882	HMDB01373	444485					0.75	1.04	1.05		1.21	3.44	3.62	0.45	2.84	2.99	0.55	1.05	1.56	1.65		1.45	1.12	1.63		1.4392e-07	3.3538e-09	0.2398	0.6978	0.0427	0.1986	0.0075	0.0666	0.7281	1	0.6821	0.9963	2.88e-11	2.53e-13	0.114	0.1461	2.2078e-10
	3507			3'-dephospho-acetyl-CoA	LC/MS neg	54675			193680					0.78	0.89	0.92		1	1.72	1.82	0.53	1.72	1.82	0.53	1.06	0.91	0.97		1.2	0.78	0.93		0.2004	0.0031	0.1378	0.6978	0.7471	0.6257	0.1436	0.2569	0.6308	1	0.5205	0.9577	0.0003	1.3e-06	1	0.7171	0.004
	3508			coenzyme A	LC/MS neg	46322	C00010	HMDB01423	317					0.82	1.13	1.27		1.11	3.08	6.2	0.14	2.78	5.59	0.15	2.01	0.43	0.86		2.78	0.27	0.76		0	0	0.4927	0.7062	0.0066	0.1309	0.028	0.1152	0.2582	1	0.0249	0.3744	0	0	0.4493	0.4354	9.2734e-10
	3510			pantetheine	LC/MS polar	57555	C00831		439322					0.69	0.95	1.03		1.7	7.1	9.56	0.15	4.18	5.62	0.25	1.35	1.04	1.4		1.85	0.7	1.29		0.0003	6.1385e-06	0.115	0.6978	0.0703	0.2178	0.0069	0.0666	0.8495	1	0.7952	1	2.2e-14	0	0.0026	0.0054	8.65e-13
	3514		Ascorbate and Aldarate Metabolism	ascorbate (Vitamin C)	LC/MS neg	32354	C00072	HMDB00044						0.48	1.06	1.22		59.7	471.43	459.7	0	7.9	7.7	0.1	0.98	0.77	0.75		2.14	0.3	0.65		7.3126e-05	1.3811e-06	0.0748	0.6978	0.006	0.1309	0.0005	0.0463	0.8831	1	0.5979	0.9955	0	0	2.256e-12	5.6502e-11	0
	3515			dehydroascorbate	LC/MS neg	34302	C05422	HMDB01264	835					0.9	0.99	1		1.27	1.88	2.09	0.52	1.48	1.65	0.66	1.12	0.97	1.08		1.23	0.88	1.08		0.0017	2.9067e-05	0.3101	0.6978	0.3874	0.4504	0.0939	0.2022	0.8584	1	0.9073	1	1.84e-09	1.3e-11	0.009	0.0164	2.5874e-08
	3516			threonate	LC/MS polar	27738	C01620	HMDB00943	151152					0.91	0.97	1.06		1.01	1.42	1.12	1.91	1.41	1.11	1.92	0.79	2.71	2.13		0.83	2.35	1.95		3.194e-12	1.27e-13	0.9494	0.8163	0.8436	0.6511	0.7872	0.6871	0.7817	1	0.6622	0.9955	1.27e-05	6.14e-08	0.8702	0.6894	0.0577
	3519			oxalate (ethanedioate)	LC/MS polar	20694	C00209	HMDB02329	971					0.88	0.98	1.08		0.83	0.78	1	1.58	0.94	1.21	1.31	1.29	1.22	1.58		1.45	0.99	1.43		7.9867e-06	1.6149e-07	0.9006	0.8095	0.5871	0.5454	0.4562	0.502	0.8646	1	0.484	0.9577	0.0041	1.63e-05	0.1944	0.2302	0.0303
	3520			gulonate	LC/MS polar	46957	C00257	HMDB03290	9794176					0.8	0.93	1.03		0.2	0.1	0.08	24.36	0.51	0.38	4.88	0.75	2.48	1.87		0.87	1.94	1.7		1.7e-14	1e-15	0.0776	0.6978	0.1451	0.2936	0.0136	0.0831	0.445	1	0.8269	1	0	0	5.6e-14	2.624e-12	0
	3522		Tocopherol Metabolism	alpha-tocopherol	LC/MS pos late	1561	C02477	HMDB01893	14985					0.66	1.1	1.07		4.05	7.22	32.22	0.02	1.79	7.96	0.06	4.46	0.12	0.52		7.43	0.07	0.53		2e-15	0	0.2487	0.6978	0.0705	0.2178	0.0126	0.0809	0.7218	1	0.8134	1	1e-15	0	1.5827e-06	7.8074e-06	5.5036e-09
	3544			gamma-tocopherol/beta-tocopherol	LC/MS pos late	52473								0.72	1	1.11		0.6	1.86	5.95	0.36	3.08	9.88	0.22	3.2	0.67	2.16		4.48	0.43	1.94		1.1908e-10	3.843e-12	0.3825	0.6978	0.1756	0.3142	0.048	0.156	0.9805	1	0.626	0.9955	6.71e-10	4.95e-12	0.1049	0.1377	0.0163
	3550		Folate Metabolism	5-methyltetrahydrofolate (5MeTHF)	LC/MS neg	18330	C00440	HMDB01396	146					0.75	0.98	0.92		0.78	0.79	1.17	1.16	1.01	1.5	0.9	1.48	0.91	1.35		1.94	0.74	1.44		6.6369e-06	1.3574e-07	0.0764	0.6978	0.2088	0.3424	0.0169	0.0959	0.9248	1	0.5797	0.9955	0.2464	0.0009	0.6998	0.605	0.7101
	3566		Hemoglobin and Porphyrin Metabolism	heme	LC/MS pos late	41754	C00032	HMDB03178	26945					0.51	0.92	0.88		0.3	0.72	4.83	0.15	2.4	16.03	0.05	6.68	0.11	0.72		11.94	0.06	0.76		0	0	0.3276	0.6978	0.8763	0.6682	0.3416	0.4253	0.8091	1	0.612	0.9955	1.72e-10	1.34e-12	0.0096	0.0174	0.0772
	3579		Thiamine Metabolism	thiamin (Vitamin B1)	LC/MS pos early	5341	C00378	HMDB00235	1130					0.69	1.07	1.1		0.82	1.94	3.68	0.47	2.37	4.49	0.39	1.89	0.92	1.74		2.93	0.58	1.7		5.9114e-09	1.5511e-10	0.3333	0.6978	0.0268	0.1868	0.0067	0.0666	0.6203	1	0.5024	0.9577	3.03e-09	2.1e-11	0.3729	0.3783	0.0002
	3580			thiamin monophosphate	LC/MS pos early	15798	C01081	HMDB02666	3382778					0.91	1.04	1.07		0.94	2.89	4.56	0.3	3.08	4.85	0.28	1.58	0.87	1.37		1.82	0.73	1.34		4.62e-12	1.83e-13	0.9594	0.8163	0.2054	0.3386	0.1576	0.2729	0.5522	1	0.3575	0.9359	0	0	0.6664	0.5832	7.263e-12
	3603		Vitamin B6 Metabolism	pyridoxamine	LC/MS pos early	2150	C00534	HMDB01431	1052					0.85	0.99	1.04		1.51	2.51	3.53	0.29	1.66	2.34	0.44	1.41	0.73	1.03		1.64	0.6	0.98		1.2807e-08	3.1899e-10	0.3449	0.6978	0.1941	0.3269	0.0502	0.1565	0.9116	1	0.634	0.9955	4.14e-12	4e-14	0.0007	0.0017	2.3917e-09
	3604			pyridoxamine phosphate	LC/MS pos early	3138	C00647	HMDB01555	1053					0.77	1.01	1.09		1.57	7.36	15.75	0.06	4.7	10.05	0.1	2.14	0.47	1.01		2.82	0.33	0.93		0	0	0.1985	0.6978	0.0061	0.1309	0.0012	0.0463	0.8958	1	0.2773	0.8941	0	0	0.0067	0.0126	1.7e-14
	3606			pyridoxal	LC/MS pos early	1651	C00250	HMDB01545	1050					0.78	1.05	1.07		1.39	2.7	4.04	0.32	1.94	2.9	0.45	1.5	0.87	1.3		2.01	0.64	1.28		9.0008e-09	2.3003e-10	0.3766	0.6978	0.0309	0.1949	0.0088	0.0712	0.6408	1	0.4576	0.9577	1.4e-14	0	0.0015	0.0033	1.3646e-11
	3607			pyridoxate	LC/MS polar	31555	C00847	HMDB00017	6723					0.99	0.91	0.97		1.32	1.8	1.87	0.97	1.37	1.42	1.27	1.04	1.74	1.81		0.95	1.78	1.69		0.0045	7.5327e-05	0.6202	0.74	0.9568	0.6817	0.8512	0.722	0.5992	1	0.8842	1	0.0222	8.69e-05	0.2933	0.3162	0.0205
	3609	Xenobiotics	Benzoate Metabolism	hippurate	LC/MS neg	15753	C01586	HMDB00714	464					0.85	0.94	1.12		0.89	1.01	4.21	0.49	1.14	4.74	0.44	4.16	0.5	2.08		4.6	0.38	1.73		3.0964e-11	1.064e-12	0.9324	0.8115	0.8594	0.6601	0.6727	0.6357	0.9407	1	0.7262	0.9963	2.92e-06	1.49e-08	0.7896	0.6492	0.9291
	3621			benzoate	LC/MS neg	15778	C00180	HMDB01870	243					1.06	1.28	0.97		0.69	0.86	1.07	1.26	1.26	1.56	0.87	1.24	1.09	1.35		1.49	1.19	1.77		0.1454	0.0023	0.9854	0.825	0.7755	0.6311	0.6331	0.6101	0.6033	1	0.9409	1	0.433	0.0016	0.1406	0.1753	0.167
	3656			4-ethylphenylsulfate	LC/MS neg	36099	C13637							1	0.9	1.53		1	1	2.73	0.2	1	2.73	0.2	2.72	0.2	0.55		2.45	0.13	0.32		9.16e-13	3.8e-14	0.2061	0.6978	0.2826	0.3904	0.9915	0.7515	0.8574	1	0.0467	0.4819	2.08e-07	1.21e-09	1	0.7171	0.9922
	3831		Food Component/Plant	3-hydroxyindolin-2-one	LC/MS pos early	42561	C11130		6097					1	0.92	0.82		1	1	4	0.46	1	4	0.46	4	0.46	1.85		3.67	0.56	2.07		2.1997e-08	5.3059e-10	0.2466	0.6978	0.7022	0.6042	1	0.7515	0.3642	1	0.2697	0.8872	2.63e-09	1.83e-11	1	0.7171	1
	3838			betonicine	LC/MS pos early	38100	C08269	HMDB29412	164642					0.91	1.05	1.42		0.15	0.16	0.85	6.78	1.1	5.77	1	5.22	1.1	5.77		6.03	0.71	4.26		0	0	0.2118	0.6978	0.1519	0.2936	0.5506	0.5688	0.5537	1	0.0338	0.4166	7e-15	0	5.32e-12	1.2372e-10	2.505e-12
	3842			gluconate	LC/MS polar	587	C00257	HMDB00625	10690					0.72	0.87	0.96		1.93	1.55	1.1	2.67	0.8	0.57	5.15	0.71	4.14	2.94		0.86	3.09	2.67		5e-15	0	0.0494	0.6978	0.3942	0.4517	0.03	0.1196	0.375	1	0.7178	0.9963	1.55e-09	1.1e-11	0.0009	0.0021	0.0166
	3915			ergothioneine	LC/MS pos early	37459	C05570	HMDB03045	3032311					0.48	0.98	1.06		1.39	1.12	0.53	0.74	0.81	0.39	1.03	0.48	0.83	0.4		0.98	0.38	0.37		1.9149e-06	4.0684e-08	0.1941	0.6978	0.0212	0.1868	0.0033	0.0473	0.5633	1	0.7847	1	0.0015	6.22e-06	0.2277	0.2626	0.5882
	3917			erythritol	LC/MS polar	20699	C00503	HMDB02994	222285					0.8	1.01	1.06		0.47	0.66	0.82	1.6	1.4	1.73	0.76	1.24	1.06	1.31		1.55	0.8	1.25		0.0017	2.8849e-05	0.5983	0.74	0.2824	0.3904	0.1239	0.2402	0.9949	1	0.5209	0.9577	0.0021	8.62e-06	0.0003	0.0007	0.0163
	3942			homostachydrine	LC/MS pos early	33009	C08283	HMDB33433	441447					0.61	0.79	0.9		0.24	0.92	2.18	1.63	3.78	8.94	0.4	2.36	1.5	3.55		3.08	1.01	3.1		2.8104e-07	6.3974e-09	0.0959	0.6978	0.7016	0.6042	0.1037	0.2144	0.5837	1	0.4647	0.9577	1.22e-06	6.56e-09	7.7366e-05	0.0002	0.735
	4054			stachydrine	LC/MS pos early	34384	C10172	HMDB04827	115244					0.83	1.05	0.97		0.1	0.19	0.8	2.85	1.98	8.32	0.27	4.21	0.54	2.27		5.36	0.46	2.47		0	0	0.4041	0.7041	0.2577	0.3762	0.0888	0.1979	0.5481	1	0.7515	1	1e-14	0	2.3e-14	1.239e-12	1.1886e-11
	4078			methyl glucopyranoside (alpha + beta)	LC/MS pos early	46144								1.06	1.01	0.94		0.43	0.36	1.12	1.56	0.84	2.59	0.67	3.1	0.56	1.74		2.95	0.63	1.87		5.2782e-11	1.77e-12	0.9002	0.8095	0.7623	0.628	0.5731	0.5785	0.9023	1	0.6387	0.9955	2.93e-08	1.86e-10	4.1315e-05	0.0001	2.3217e-07
	4186		Bacterial/Fungal	tartronate (hydroxymalonate)	LC/MS neg	20693	C02287	HMDB35227	45					1.01	0.97	1.17		0.85	0.68	1.03	1.42	0.8	1.21	1.21	1.52	0.96	1.46		1.46	0.83	1.21		8.6588e-06	1.7355e-07	0.35	0.6978	0.4142	0.4591	0.8504	0.722	0.863	1	0.1131	0.7176	0.0005	2.12e-06	0.194	0.2302	0.0011
	4556		Drug - Topical Agents	salicylate	LC/MS polar	1515	C00805	HMDB01895	338					1.01	1.04	1.12		0.69	0.39	0.89	1.75	0.56	1.29	1.21	2.31	0.67	1.56		2.39	0.61	1.45		1.5232e-07	3.5377e-09	0.3954	0.7025	0.8433	0.6511	0.8164	0.7033	0.7793	1	0.3367	0.9359	0.0001	4.4e-07	0.1022	0.1354	3.985e-05
	4627		Chemical	O-sulfo-L-tyrosine	LC/MS neg	45413			514186					1	1.07	0.92		0.63	0.97	1.42	0.92	1.55	2.27	0.58	1.46	0.9	1.31		1.56	0.97	1.52		7.8127e-08	1.8331e-09	0.8679	0.8095	0.4308	0.4694	0.9438	0.7462	0.4662	1	0.2796	0.8941	6.64e-08	4.04e-10	4.5417e-05	0.0002	0.6899
	4674			S-(3-hydroxypropyl)mercapturic acid (HPMA)	LC/MS neg	44552			3371179					1.18	1.1	1		0.08	0.13	0.26	12.41	1.56	3.24	1	2.07	1.56	3.24		1.92	1.85	3.55		1.1918e-08	2.9903e-10	0.3767	0.6978	0.7735	0.6311	0.316	0.4092	0.597	1	1	1	3e-10	2.29e-12	3.876e-10	5.2582e-09	2.5401e-09
	4703			lanthionine	LC/MS pos early	42002			98504					0.44	0.98	0.93		2.57	2.47	2.31	0.68	0.96	0.9	1.74	0.94	1.67	1.56		2.1	0.78	1.65		0.1913	0.003	0.1084	0.6978	0.2991	0.3964	0.0356	0.1274	0.9958	1	0.5116	0.9577	0.0597	0.0002	0.0125	0.0215	0.0169
	4764			thioproline	LC/MS pos early	53231			93176					0.43	1.04	1.1		1.14	6.38	16.76	0.03	5.59	14.68	0.03	2.62	0.17	0.45		6.33	0.07	0.43		2.11e-13	1e-14	0.1949	0.6978	0.0498	0.1986	0.0073	0.0666	0.8567	1	0.7091	0.9963	7.67e-13	8e-15	0.7354	0.6187	4.7193e-05
[truncated: 47 more columns]
