# Supplementary material for: Metabolomic profiling reveals a differential role for hippocampal glutathione reductase in infantile memory formation
Source: eLife. 2021 Nov 26;10:e68590. doi: 10.7554/eLife.68590 (PMC8626085; doi:10.7554/eLife.68590)
Supplement: Figure 2—source data 1. [file elife-68590-fig2-data1.xlsx]

## Sheet: Figure 2-Source Data 1
Figure 2-Source Data 1
Figure 2
#	Pathway	Sub Pathway	PN1 vs. PN80	PN7 vs. PN80	PN17 vs. PN80	PN24 vs. PN80			Significantly downregulated
1	Amino acids	Glycine, Serine and Threonine Metabolism	0.846084	0.127759	0.304659	0.670789			Significantly upregulated
2		Alanine and Aspartate Metabolism	0.0141464	-0.388844	0.0616675	0.363503			Non-significant change
3		Glutamate Metabolism	0.106	-0.137736	-0.109227	0.292136
4		Histidine Metabolism	2.60585	-0.178559	1.20855	0.490084
5		Lysine Metabolism	0.944638	-0.319069	-0.248639	0.221297
6		Phenylalanine Metabolism	0.352972	-0.0607141	0.642946	0.668748
7		Tyrosine Metabolism	0.797629	0.678863	0.933506	0.420675
8		Tryptophan Metabolism	0.166305	-0.335232	0.487002	0.49913
9		Leucine, Isoleucine and Valine Metabolism	0.894654	1.03566	0.799716	0.884969
10		Methionine, Cysteine, SAM and Taurine Metabolism	0.959962	0.281956	0.229816	0.353834
11		Urea cycle; Arginine and Proline Metabolism	0.65566	0.00487728	0.15562	0.503504
12		Creatine Metabolism	0.429155	0.482836	-0.12051	0.19456
13		Polyamine Metabolism	2.70502	2.18336	1.07953	1.20728
14		Guanidino and Acetamido Metabolism	-0.395878	-0.0726533	0.427613	1.01048
15		Glutathione Metabolism	0.633129	-0.375512	0.118832	0.145553
16	Peptides	Gamma-glutamyl Amino Acid	0.196292	-0.932555	-1.10939	0.283137
17		Dipeptide	-0.0181771	-0.0601611	0.216043	0.497534
18	Carbohydrates	Glycolysis, Gluconeogenesis, and Pyruvate Metabolism	0.12425	-0.316946	0.231491	0.290877
19		Pentose Phosphate Pathway	-0.59862	-0.478207	-0.0221656	0.249134
20		Pentose Metabolism	-0.124496	-0.612536	0.23372	0.544785
21		Glycogen Metabolism	5.57459	2.81431	1.28926	0.936189
22		Fructose, Mannose and Galactose Metabolism	-0.277358	-0.417547	0.29658	0.580457
23		Nucleotide Sugar	2.78962	2.44426	1.39666	0.6057
24		Aminosugar Metabolism	0.607837	0.140637	0.215088	0.628337
25		Advanced Glycation End-product	-1.69299	-2.74009	-2.74009	-0.420703
26	Energy	TCA Cycle	-0.516142	-0.360417	-0.0830183	-0.0959914
27		Oxidative Phosphorylation	-0.695497	-0.599054	0.0397268	0.114517
28	Nucleotides	Purine Metabolism, (Hypo)Xanthine/Inosine containing	0.788976	0.114486	0.00443701	0.134725
29		Purine Metabolism, Adenine containing	1.67822	1.60612	-0.0529147	-0.0325611
30		Purine Metabolism, Guanine containing	3.84158	3.60911	2.92482	0.621141
31		Pyrimidine Metabolism, Orotate containing	2.44654	2.13844	1.39985	0.975004
32		Pyrimidine Metabolism, Uracil containing	2.71098	1.34042	0.700678	0.563035
33		Pyrimidine Metabolism, Cytidine containing	1.59086	0.795117	0.520872	0.928974
34		Pyrimidine Metabolism, Thymine containing	-0.0995315	-0.34213	0.269671	0.606584
35	Cofactors and Vitamins	Nicotinate and Nicotinamide Metabolism	0.499148	2.14418	0.112365	0.599067
36		Riboflavin Metabolism	-0.992004	-0.901019	-0.35316	0.395872
37		Pantothenate and CoA Metabolism	-0.488651	-0.974923	-0.0983233	0.251815
38		Ascorbate and Aldarate Metabolism	2.18213	0.336637	0.429577	0.366043
39		Tocopherol Metabolism	-3.06649	-3.17525	-1.82514	0.009023
40		Folate Metabolism	0.208627	-0.149787	-0.13475	0.434253
41		Hemoglobin and Porphyrin Metabolism	-2.73799	-4.46995	-3.20602	-0.467088
42		Thiamine Metabolism	-1.38767	-1.58954	-0.16492	0.628039
43		Vitamin B6 Metabolism	-2.17456	-1.62484	-0.519636	0.031905
44	Lipids	Fatty Acid Synthesis	0.0339178	0.0893881	0.416332	0.630527
45		Medium Chain Fatty Acid	1.24106	1.23175	1.12129	1.03601
46		Fatty Acid, Dicarboxylate	1.24165	0.427299	0.825463	0.40927
47		Fatty Acid Metabolism (BCAA Metabolism)	1.19054	2.44019	1.53603	0.577602
48		Fatty Acid Metabolism(Carnitine/Acyl Carnitine)	-1.25033	-0.0905922	0.502614	0.511039
49		Ketone Bodies	1.70631	2.27524	2.80035	0.454982
50		Fatty Acid Metabolism (Acyl Choline)	-1.03232	-0.779342	-0.099351	0.596224
51		Fatty Acid, Monohydroxy	0.034125	0.0913515	0.109061	0.0938443
52		Eicosanoid	-1.1361	-0.305158	0.475127	0.855655
53		Endocannabinoid	-2.38918	-2.31744	-1.13597	-0.163644
54		Inositol Metabolism	-0.707913	-1.80685	-1.38276	0.075791
55		Phospholipid Metabolism	-0.30011	-0.380106	-0.220166	0.11163
56		Glycerolipid Metabolism	1.40691	0.691032	-0.137311	0.174915
57		Monoacylglycerol	0.812646	0.00351939	-0.120806	-0.0230181
58		Sphingolipid Metabolism	-3.73843	-2.89691	-1.0791	-0.0598185
59		Sterol	-0.157405	0.234186	0.215406	-0.0212846
