# Supplementary material for: Metabolomic profiling reveals a differential role for hippocampal glutathione reductase in infantile memory formation
Source: eLife. 2021 Nov 26;10:e68590. doi: 10.7554/eLife.68590 (PMC8626085; doi:10.7554/eLife.68590)
Supplement: Figure 3—source data 1. [file elife-68590-fig3-data1.xlsx]

## Sheet: Figure 3-Source Data 1
Figure 3-Source Data 1
Figure 3a
Sample	PN1_1M	PN1_2F	PN1_3M	PN1_4M	PN1_5F	PN7_1M	PN7_2M	PN7_3F	PN7_4F	PN7_5F	PN17_1F	PN17_2M	PN17_3F	PN17_4F	PN17_5M	PN17_6M	PN17_7M	PN24_1M	PN24_2F	PN24_3M	PN24_4M	PN24_5M	PN24_6F	PN24_7F	PN80_1M	PN80_2M	PN80_3M	PN80_4M	PN80_5M	PN80_6M	PN80_7M
Age	PN1	PN1	PN1	PN1	PN1	PN7	PN7	PN7	PN7	PN7	PN17	PN17	PN17	PN17	PN17	PN17	PN17	PN24	PN24	PN24	PN24	PN24	PN24	PN24	PN80	PN80	PN80	PN80	PN80	PN80	PN80
(N(1) + N(8))-acetylspermidine	0.6628	1.1597	0.8489	1.4674	0.9238	0.7075	0.9861	0.6234	0.6296	0.9195	1.4405	1.054	1.007	1.2956	0.7657	0.993	1.0225	0.9869	0.9371	1.0542	1.1272	1.2525	1.1005	0.9142	1.1027	0.7517	1.0561	0.833	0.8526	1.1325	0.9744
1,5-anhydroglucitol (1,5-AG)	0.709	0.9492	0.6797	1.3041	0.9838	0.9586	1.0803	0.9257	0.7996	1.2633	1.901	1.874	1.6914	2.0963	1.8058	2.3441	1.6482	1.2414	0.7939	1.177	0.919	1.0514	0.9871	0.9805	0.8433	0.8271	0.7303	0.9019	0.5457	0.9988	1.292
1-docosahexaenoylglycerol (22:6)	0.154	1.7198	0.9591	1.747	1.0959	1.3513	0.9989	0.154	1.1069	1.3272	0.154	0.499	1.5877	0.6224	1.3047	0.9668	1.1641	0.7313	0.8493	1.2073	0.7289	1.595	1.7611	1	1.2864	0.5998	1.3934	0.154	0.154	0.3733	0.3512
1-methyl-4-imidazoleacetate	0.2016	0.2713	0.4299	0.3258	0.9718	0.221	0.2002	0.1433	0.1471	0.1658	0.8124	1.0762	1.2764	1.1133	1.0314	1.1378	1.2413	1.0679	1.2424	1.2874	1.3793	1.3115	1.5275	1.2905	0.6002	0.7214	0.7606	0.6125	0.4306	0.6026	0.7995
1-methylguanidine	0.8993	1.0589	0.8964	1.4784	0.8725	0.8463	1.0086	0.9026	0.8776	1.1874	0.2165	0.6809	0.7049	0.7545	0.6864	0.666	0.8414	1.5041	1.526	2.1507	1.5489	1.7221	1.8449	1.1496	1.1851	0.9002	0.8749	0.9319	0.7775	1.0865	1.0051
1-methylhistidine	2.2345	4.5897	2.4912	4.6499	2.2755	0.9959	1.0179	1	0.9548	0.7732	1.1435	1.6323	2.4212	2.4225	1.5494	1.3967	1.8749	0.4199	0.5724	0.9347	1.0597	0.9649	1.4183	0.4526	0.1892	0.2781	0.6116	0.6227	0.439	0.4145	1.3001
1-methylnicotinamide	0.2379	0.7598	0.301	0.3568	0.199	0.199	0.268	0.3957	0.199	0.2036	1.7018	1.9653	1.9418	2.0253	2.1421	2.0081	2.4738	1.363	0.9912	1.2015	1.0088	0.963	1.1218	1.0519	0.6906	0.6883	0.5496	0.6045	0.6461	0.8398	0.7269
1-oleoylglycerol (18:1)	1.6293	7.0905	2.9131	5.1236	3.05	1.4827	1.302	0.437	1.0511	1.2604	0.3962	0.2312	0.1872	0.1872	2.5643	0.2761	1.0704	0.7148	0.662	0.6366	0.7238	0.9278	1.254	0.6884	3.8578	0.8636	1.2224	0.3614	0.7155	0.9604	1.3823
1-palmitoylglycerol (16:0)	0.8496	4.6981	1.5568	2.3185	1.4057	1.3595	1.5849	0.7195	2.8369	1.3363	0.5436	2.2132	8.2104	0.5397	0.5995	1.2939	1.9207	0.7057	0.7204	0.8161	1.1264	1.4615	1.9097	0.8045	1.0193	0.7993	0.8075	0.7389	0.554	0.65	1.57
1-ribosyl-imidazoleacetate	13.4506	19.374	18.9089	26.9639	38.8845	1	1.0345	0.6416	0.5596	0.637	2.7431	4.9381	2.1004	2.7056	4.3904	4.6548	5.0391	1.1232	0.8282	0.7186	0.8392	1.058	0.7741	0.9971	0.3195	0.2633	0.17	0.2954	0.1137	0.347	0.2219
12-HETE	0.1096	0.3076	0.1096	0.6511	0.3477	0.7977	0.8461	0.8708	0.7943	0.7963	1.4253	2.0633	2.5103	1.8041	1.8519	1.8696	1.232	1.651	0.7896	2.9696	2.341	2.7307	2.2103	1.9973	1.0548	1.1041	0.98	0.236	0.72	0.2883	0.9887
13-HODE + 9-HODE	0.2299	0.9546	0.6181	1.0496	0.9099	1.0454	1.0856	0.9096	0.7444	1.2529	0.4169	1.2793	1.1046	0.6243	1.4491	1.2103	1.4398	1.2556	1.3794	1.1606	1.3435	1.37	1.1662	1.0509	0.3995	0.5498	0.3623	0.6212	0.3437	0.5369	0.2869
15-HETE	0.3132	0.4177	0.3057	0.5801	0.2984	0.6385	0.7318	0.675	0.6386	0.6765	0.4706	1.2616	0.9087	0.8541	1.3873	1.1553	1.27	1.6615	1.6034	1.975	1.9902	1.7215	1.7107	1.4698	1.1279	0.946	0.806	0.7904	0.7703	1.0557	0.9058
15-KETE	0.5274	0.7754	0.4786	0.8039	0.3543	0.7418	1.0011	1.1158	0.8353	1.0789	0.246	1.1096	1.1708	1.2126	1.1613	0.9217	1.1997	1.5458	1.3401	1.3327	1.4987	1.2988	1.4766	1.1995	1.0244	0.7691	0.8781	0.8666	0.7066	0.6946	0.7215
2'-deoxycytidine	0.5188	0.735	0.5605	0.8077	0.5603	0.9407	0.9722	0.7671	0.9264	0.9849	1.0763	1.1395	1.2028	1.0814	1.1678	1.2333	1.4067	1.0828	1.0796	1.3329	1.2014	1.3551	1.2114	1.0151	0.477	0.4008	0.3889	0.3333	0.3602	0.5448	0.4373
2'-deoxycytidine 5'-monophosphate	0.7679	0.8762	0.7668	1.0155	0.7897	0.6559	0.6112	0.496	0.5446	0.5188	0.7004	0.7229	0.8305	0.9564	0.7336	0.781	0.9845	1.9386	1.7784	1.925	2.1172	2.2973	1.922	1.6795	1.1793	1.0586	1.2079	0.9824	0.9102	1.3484	1.4296
2'-deoxyinosine	1.3988	1.5352	1.4152	1.7028	1.5003	1.2729	1.2178	0.8985	1.0556	1.0916	0.73	0.7345	0.6748	0.6783	0.8021	1.0552	1.0802	1.0475	1.0156	1.4294	1.1368	1.4992	1.363	0.9949	1.0516	0.7141	0.7839	0.8159	0.5959	0.9208	1.0051
2'-deoxyuridine	0.2788	0.5855	0.3545	0.3955	0.2098	0.8451	0.9707	0.8805	1.1154	0.8977	1.1571	1.2497	1.23	1.0742	1.2423	1.1044	1.3473	0.9955	1.2604	1.301	0.9105	1.2315	1.1549	1.0926	0.7942	0.6219	0.5673	0.5224	0.5324	0.7409	0.6244
2'-O-methylcytidine	3.4649	4.0737	3.2987	4.7002	3.6224	3.9662	2.914	2.4792	3.1713	2.3374	0.8951	1.0522	1.0735	1.353	0.9977	1.8044	1.8782	0.7688	0.6798	1.2685	0.9664	1.0797	0.9192	0.4751	0.8037	0.7514	0.8529	0.9498	0.2485	1.1017	0.987
2-aminoadipate	0.9264	1.0845	0.7626	1.14	0.9491	0.3957	0.5894	0.3411	0.364	0.5553	0.7842	0.8739	1.0628	1.2857	1.4718	0.9801	0.8763	2.9105	2.0861	2.4312	1.9694	2.7417	2.0096	1.7636	0.6213	0.6201	0.7716	0.9252	0.9629	0.9696	1.4183
2-aminoheptanoate	1.2429	1.3905	0.9021	1.5133	0.6094	0.6094	0.857	0.9712	0.856	0.6094	0.6094	0.9029	0.853	0.6094	1.2894	1.0354	0.7721	1.7615	1.1014	1.7546	1.6695	1.5649	1.0864	1.2398	1.0415	0.8821	1.4348	0.6094	0.7007	0.8196	0.9563
2-docosahexaenoylglycerol (22:6)	0.3258	1.0482	0.3258	1.0274	1.2084	1.0358	0.5439	0.3258	1.0934	0.9174	0.3258	0.3258	1.0026	0.882	1.1215	1.0348	1.433	0.8157	1.0309	1.4511	0.5731	1.6657	1.5465	0.8084	0.7975	0.3258	1.1859	0.3258	0.3258	0.3258	0.5193
2-hydroxyadipate	1.3717	0.2798	1.0359	0.5614	0.2948	0.2798	0.2798	0.3904	1.6272	0.7807	0.2798	0.2798	2.3254	2.3385	0.7761	0.4603	1.304	0.9492	2.1185	1.0174	1.3808	1.2839	1.5204	0.8277	0.6309	0.7806	0.9797	1.121	0.644	0.9826	1.1271
2-hydroxybehenate	0.501	0.3403	0.3842	0.3832	0.3981	0.3648	0.2905	0.3319	0.3407	0.3377	0.7226	0.6193	0.5306	0.4853	0.5412	0.5879	0.4915	2.2405	1.1412	1.1277	1.1285	1.6403	1.0496	1.0887	3.2283	1.1974	1.5279	0.8003	1.0569	1.9496	1.2192
2-hydroxybutyrate/2-hydroxyisobutyrate	1.1483	1.1086	1.1866	1.4504	1.209	1.1011	1.2056	1.1874	0.9467	1.2804	1.2888	1.6966	1.9392	1.7481	1.9008	1.8581	2.0406	1.0265	0.7878	0.9457	0.922	0.9253	0.9735	0.7019	0.6025	0.5248	0.5842	0.5819	0.4623	0.586	0.5614
2-hydroxydecanoate	1.5034	1.5354	1.1492	1.6514	1.2414	1.0526	1.1344	1.2063	1.1315	1.2048	0.2681	0.8805	1.0148	1.0522	1	1.0192	1.124	1.047	0.7545	1.2163	0.8475	1.1276	1.1813	0.782	0.6464	0.5071	0.7194	0.2681	0.5363	0.5783	0.569
2-hydroxyglutarate	0.8085	0.9491	0.7638	1.1184	0.8355	1.1931	1.1446	0.8762	0.9752	1.1395	1.0161	1.3556	1.383	1.3134	1.4924	1.3262	1.3125	1.2914	0.9265	1.2481	1.0429	1.0467	1.1099	0.9271	0.7269	0.7719	0.7832	0.7404	0.5848	0.7288	0.7645
2-hydroxyheptanoate	1.0597	1.1386	0.9344	1.1975	0.8326	0.9502	1.1048	0.9137	0.7584	1.0092	0.4861	1.3389	1.4627	1.3122	1.3727	1.5627	1.5705	1.067	1.0222	1.1134	1.1233	0.9723	1.0098	0.9285	0.5547	0.4719	0.5179	0.5563	0.4503	0.5585	0.5274
2-hydroxypalmitate	0.8882	1.2947	1.1489	1.5004	0.9597	1.2227	1.1104	1.0939	0.9223	1.5549	0.825	1.061	1.5729	1.597	1.161	0.8646	1.2671	1.2383	0.8339	0.8149	0.7926	1.0908	1.1002	0.8504	1.2489	0.6682	1.0008	0.6502	0.736	0.9018	0.6782
2-methylbutyrylcarnitine (C5)	0.4118	0.5464	0.3081	0.3081	0.5424	2.537	2.1135	1.4014	1.4711	1.4983	1.6108	1.9742	1.3644	1.2852	1.2164	1.4604	1.1397	1.5062	0.88	1.618	0.3081	1.115	1.1253	0.8916	0.8079	0.6577	0.7972	0.5807	0.5868	0.7737	0.4827
2-methylcitrate/homocitrate	0.2231	0.2321	0.1819	0.2464	0.1751	0.4908	0.496	0.4059	0.4679	0.4487	1.0956	1.107	1.126	0.9996	1.2216	1.2725	1.5419	1.7508	1.66	2.1084	1.3538	1.7246	1.5139	1.3606	0.9329	0.8428	0.8406	0.9811	0.6723	0.9087	0.9527
2-methylserine	4.7344	5.6832	5.0578	6.7008	1.4993	0.308	1.2724	0.2632	0.5249	0.4005	0.7781	0.6418	0.3358	0.361	0.3757	0.69	0.9103	3.5792	3.0503	3.2594	2.5518	3.6403	3.2819	0.2632	0.674	0.8488	1.7543	0.2632	0.619	1.3363	1
2-oleoylglycerol (18:1)	1.1911	4.2182	2.2867	3.9062	2.363	0.8192	1.0388	0.3721	0.8553	0.9612	0.3117	0.2525	0.2705	0.1215	1.1915	0.3292	0.6889	0.7141	0.8121	1.0408	0.9375	1.3107	1.136	0.8448	2.7282	1.0503	1.1761	0.7212	0.6372	0.8714	1.0475
2-oxoarginine	0.6325	0.9664	0.8051	0.9997	0.8301	0.7816	1.0058	0.7884	0.9187	0.9721	0.4904	0.9206	0.9736	0.5747	1.1696	1.0003	1.2852	1.4617	1.4454	2.0192	1.2895	1.6397	1.2565	1.3966	1.4722	1.5088	0.8206	0.6333	0.7889	1.1112	1.1697
2-palmitoylglycerol (16:0)	1.003	3.4529	2.0127	3.4037	1.611	1.5231	2.023	0.8428	2.064	1.6513	0.1346	0.1346	0.8157	0.3794	0.4836	1.2713	1.3185	0.8246	0.7116	0.6827	1.0355	1.0963	1.4102	0.9913	1.7934	0.494	0.937	0.4912	0.4811	0.1346	1.1169
3'-dephosphocoenzyme A	0.2386	0.5233	0.2947	0.4802	0.4529	0.5166	0.4532	0.3643	0.5966	0.4796	1.862	1.0729	1.0754	1.4769	1.1792	1.307	1.6059	1.1794	1.3861	1.3662	1.6313	1.5166	1.3694	1.6381	0.7622	0.7043	0.833	0.8988	0.7554	0.8489	1.3254
3-(4-hydroxyphenyl)lactate	0.7522	0.8352	0.7594	0.9456	0.8544	0.9046	0.9854	0.9167	0.8035	1.0661	0.9669	1.043	1.0773	0.884	1.0719	1.5615	1.4053	0.8453	0.6273	1.424	1.3089	1.2392	1.2848	1.0272	0.9118	0.9055	0.9453	0.999	0.8692	1.2127	1.1691
3-aminoisobutyrate	0.6739	0.7227	0.4814	0.8206	0.5225	0.3865	0.5049	0.2512	0.4163	0.4648	0.7006	0.9524	1.9813	0.2512	1.4263	0.5505	1.2574	1.5443	1.9341	2.3738	1.4287	1.5582	1.1982	0.7546	1.4172	0.2777	1.0679	0.2512	0.2512	0.9904	0.2512
3-hydroxy-3-methylglutarate	0.9831	1.1546	0.8362	1.3864	0.6408	1.9317	2.0353	1.7883	1.6795	1.8717	1.2465	1.5125	1.6584	1.4181	1.4944	1.6837	1.7015	1.0169	0.8221	1.1617	0.834	1.0337	0.8989	0.706	0.4047	0.4153	0.3544	0.4082	0.288	0.4325	0.5032
3-hydroxyadipate	1.943	1.6258	1.2405	2.2774	0.5606	1.8604	2.9511	1.7797	2.35	2.6329	2.7567	4.7127	4.8206	4.5132	4.5404	4.6345	4.7201	0.7164	0.9683	1.3293	0.322	0.5213	0.4629	0.564	0.6557	0.459	0.4393	0.5166	0.3724	0.5374	0.187
3-hydroxybutyrate (BHBA)	1.5585	1.9331	1.7427	2.8138	1.1242	2.5232	2.752	2.6752	2.4058	3.2502	2.5218	4.8875	4.871	4.0221	3.6774	3.7439	3.6885	1.1224	0.6306	0.6852	0.8168	0.785	0.7995	0.5546	0.5587	0.4979	0.5354	0.7456	0.3351	0.629	0.6334
3-hydroxybutyrylcarnitine (1)	1.3619	1.229	1.1317	1.3759	0.885	3.0598	3.7214	3.0679	2.9596	3.0351	3.8361	6.5157	6.125	5.8626	6.0539	4.9793	5.2431	1.048	0.7986	0.9257	0.9118	0.9199	0.952	0.7235	0.4818	0.3497	0.499	0.5705	0.3752	0.4177	0.4359
3-hydroxybutyrylcarnitine (2)	0.9213	0.959	0.6609	0.9336	0.7149	2.0764	2.5214	1.9224	2.184	2.1963	1.7027	2.2044	2.2931	2.2294	1.9509	1.8098	1.5845	0.9989	0.7671	0.8841	1.0409	1.0759	0.9658	0.7187	0.8033	0.6109	0.762	0.8017	0.7911	0.7255	0.5459
3-hydroxyhexanoate	0.4755	1.0081	0.8912	1.5391	0.9392	0.7533	0.9772	3.9	1.0987	0.9919	0.4755	1.2794	3.4574	1.1462	1.0433	1.0384	1.0741	0.4755	0.7182	0.4755	0.4755	0.4755	0.4755	0.4755	0.4755	0.4755	0.4755	0.6503	0.4755	0.4755	0.4755
3-hydroxyisobutyrate	2.0446	2.5798	2.6622	3.6998	2.4623	1.3753	1.6824	1.1796	1.3335	1.8698	1.3306	1.4516	1.7359	1.1948	1.1938	1.2396	1.167	1.197	0.7171	1.1745	0.8234	0.7117	0.974	0.6713	0.3849	0.277	0.3213	0.4797	0.2825	0.2629	0.4545
3-hydroxypalmitate	0.9455	0.984	0.7427	0.9133	1.1114	1.18	1.3936	0.8384	1.3755	0.9987	0.3704	1.5082	1.2267	1.2319	1.357	1.9445	1.4974	1.0598	1.0246	0.8774	1.0013	1.0541	0.858	0.8221	1.2856	0.8471	0.7746	0.4634	0.4666	0.5187	0.5872
3-methoxytyrosine	0.5889	0.7275	0.508	1	0.4899	1.7676	1.8864	2.1855	2.0385	2.0215	2.7572	3.3414	4.5365	3.1886	4.2287	5.4733	5.3657	0.1388	0.5607	0.1388	0.3874	0.7055	0.5363	0.3084	0.1388	0.1388	0.2694	0.1388	0.1388	0.1388	0.3031
3-methylcytidine	0.1819	0.2737	0.1916	0.2529	0.2109	0.2326	0.2459	0.208	0.1833	0.219	0.3736	0.3923	0.4892	0.4205	0.591	0.4642	0.4798	1.3175	1.4791	1.618	1.4339	1.4628	1.3328	1.2325	1.1668	1.1381	1.0473	1.1827	0.9526	1.1638	1.2661
3-methylglutaconate	0.6691	0.7326	0.4878	1.1215	0.4548	0.9475	0.9376	0.9988	0.9268	1.3187	1.2011	1.4422	1.5234	1.1247	1.4566	1.4867	1.5598	1.8012	1.1269	1.6465	0.7221	1.429	1.0474	0.8615	0.5605	0.7483	0.453	0.4842	0.3792	0.6466	0.5518
3-methylhistidine	0.9065	1.9857	1.0167	2.2848	1.4339	0.2408	0.2975	0.3012	0.2551	0.3238	1.4824	1.6284	2.5566	2.1335	1.7172	1.8585	2.7063	0.1265	0.1265	0.4065	0.234	0.3434	0.1265	0.1265	0.6852	0.7601	0.9778	0.8164	1.052	0.864	1.813
3-phosphoglycerate	2.2806	3.2174	2.9746	2.9893	3.451	1.5761	1.4157	1.8599	1.4004	1.8967	0.9725	0.9993	0.9377	1.015	1.0632	1.1007	1.0537	0.8911	1.0051	0.9864	1.0657	0.9571	1.2018	1.0203	0.8179	0.9032	1.0146	0.9036	0.8343	0.8815	0.8233
3-ureidopropionate	3.7501	5.2863	5.9629	6.2859	4.4659	1.5724	1.3822	1.748	1.3869	1.468	1.0834	1.2974	1.55	1.0687	0.7884	0.7135	0.9313	1.127	0.879	1.2661	0.6651	0.7224	0.8813	0.3552	0.2471	0.3309	0.3373	0.2471	0.2471	0.2471	0.5357
4-cholesten-3-one	0.8676	1.2039	0.8832	1.1617	0.9381	0.7698	0.9998	0.8669	0.7828	0.9422	0.7082	1.0848	1.6124	1.1001	1.15	1.3108	1.2439	1.4224	1.368	1.1834	1.034	1.1912	1.1542	0.9974	0.9309	0.7854	0.6961	0.6726	0.7039	0.8224	0.7168
4-guanidinobutanoate	0.0485	0.0754	0.0434	0.0754	0.0475	0.3867	0.4691	0.3688	0.3986	0.4301	1.0121	1.337	1.3236	1.2862	1.3307	1.3605	1.4152	1.2791	1.1714	1.7166	1.1087	1.2845	1.3997	0.9879	0.5225	0.4199	0.484	0.3545	0.3676	0.592	0.6216
4-hydroxy-nonenal-glutathione	0.8424	0.9708	0.8194	1.3107	0.9175	1.057	1.129	0.8558	0.9686	0.8677	0.5288	1.4271	1.3911	2.1467	1.2559	1.9442	1.9395	0.9924	1.0583	1.0341	1.0892	1.0544	1.0947	0.9568	0.7942	0.5337	0.8695	0.7486	0.6015	0.8562	0.6457
5,6-dihydrouridine	2.6583	2.8837	2.5304	3.9956	2.3601	1.3906	1.2917	1.263	1.3194	1.5227	0.9247	0.7798	1.1327	1.1764	1.1154	0.975	1.0918	0.8788	0.7983	1.1013	1.0581	1.2451	1.1609	0.1785	0.7322	0.4833	0.678	0.5641	0.3522	0.7576	0.7574
5-(galactosylhydroxy)-L-lysine	1.3801	1.8221	1.4455	1.9612	1.6295	0.99	1.1328	0.9176	0.9991	1.1639	0.952	0.9432	1.0465	1.0819	1.2582	1.1223	1.1601	1.0604	1.0536	1.2486	1.1179	1.1584	1.0164	0.9033	0.581	0.6574	0.5177	0.4381	0.4301	0.5714	0.7155
5-aminovalerate	0.2803	0.42	0.2603	0.4997	0.2768	0.4752	0.5323	0.5276	0.4306	0.5138	0.3668	0.7349	1.0679	0.9816	0.7389	0.7983	0.9051	1.2148	1.2545	1.3748	0.8893	0.9343	0.8708	0.8197	1.3443	1.3517	1.3629	1.2024	1.3228	1.2178	1.3039
5-HETE	0.1859	0.4931	0.2081	0.5762	0.1602	0.5914	0.467	0.7549	0.4119	0.6992	0.3115	1.1263	1.4857	1.5511	1.1421	1.3908	0.9828	1.6879	1.0235	1.609	2.4561	1.4884	1.7887	1.1339	1.666	0.8338	0.8816	0.5942	0.7176	0.9095	0.9937
5-hydroxyindoleacetate	0.1307	0.1886	0.1782	0.2326	0.1459	0.2927	0.3169	0.3174	0.2465	0.237	0.9984	0.9259	0.9448	0.9418	0.7791	0.834	1.0881	1.2285	1.4113	1.8686	1.7293	1.88	1.8805	1.5072	0.9431	0.705	1.1082	1.0789	1.0016	0.8962	1.2884
5-KETE	0.5375	0.5559	0.268	0.6181	0.268	0.7056	0.7144	0.7914	0.531	0.598	0.268	1.3526	1.1251	1.4311	0.9893	1.4163	1.1875	1.4759	1.1298	1.3549	1.524	1.444	1.2324	0.9986	1.6448	0.8897	1.1711	0.7137	0.6384	0.9804	0.6337
5-methyl-2'-deoxycytidine	0.7939	1.0705	0.7819	1.1651	0.7432	1.0122	1.2562	0.8947	1.0716	1.21	0.7563	0.9048	1.0349	0.9878	1.0142	1.1589	1.2391	1.8148	1.3302	2.4628	1.7642	2.2628	1.7439	1.3513	0.3191	0.3114	0.2893	0.3213	0.2709	0.7052	0.3382
5-methylcytidine	0.7098	0.8605	0.6824	1.1077	0.858	0.8831	0.8604	0.7006	0.7154	0.7575	0.9014	1.1306	1.3165	1.2003	1.1439	1.3605	1.4753	1.2557	1.2286	1.4558	1.2933	1.4327	1.2044	1.0479	0.5854	0.4491	0.5424	0.5025	0.4638	0.6313	0.6193
5-methyltetrahydrofolate (5MeTHF)	0.2368	1.2262	1.0596	1.8327	1.0375	0.9213	1.025	0.8187	0.5254	0.9161	0.8565	0.7254	0.6187	0.8787	0.639	1.1718	1.0607	1.2033	1.0182	1.3383	1.4395	1.5269	1.2885	1.0133	0.8624	0.8122	0.9267	0.9158	0.6405	1.1199	1.2559
5-methylthioadenosine (MTA)	0.8016	1.2773	0.8793	1.4655	1.1627	0.9957	1.0491	0.8547	0.9327	1.0501	0.7709	1.0043	1.1803	1.1074	1.1353	1.3041	1.2575	1.128	1.1695	1.5524	1.278	1.4529	1.2475	1.0175	0.6653	0.6284	0.5556	0.4584	0.4817	0.6535	0.8229
5-oxoproline	0.3372	0.2829	0.3138	0.5165	0.2923	0.2868	0.3211	0.1586	0.2225	0.2964	0.4384	0.5336	0.5537	0.5082	0.6356	0.6364	0.6841	1.5404	1.4852	1.7397	1.6543	1.8553	1.5267	1.2968	1.5456	1.0806	1.0651	1.1202	0.9349	1.2211	1.6675
5-phosphoribosyl diphosphate (PRPP)	0.47	0.588	0.6109	0.8885	0.6799	0.6031	0.655	0.6044	0.6173	0.6907	0.6539	0.2483	0.34	0.5966	0.1461	0.4162	0.4599	0.9285	1.0121	0.962	1.1944	1.1825	1.3933	1.2158	1.4244	1.354	1.6247	1.4362	1.3837	1.5513	1.4655
6-phosphogluconate	0.5201	0.9812	0.7127	0.6822	1.2841	2.1252	1.5966	1.652	1.4287	1.3167	0.8899	1.5562	1.1591	1.4398	1.008	1.8107	1.9196	0.6091	0.668	1.3268	1.0076	0.9557	1.1798	1.0627	0.4969	0.4854	0.6888	0.3524	0.3798	0.5937	0.4808
7-hydroxycholesterol (alpha or beta)	0.8805	0.91	0.8809	0.9548	0.7975	0.9924	1.127	1.0747	0.7606	1.0349	0.3906	1.7576	1.7163	1.9535	1.433	1.7777	1.7156	1.1549	0.9676	1.018	1.209	1.1662	1.0575	0.8774	0.9965	0.7676	0.9657	0.9299	0.8331	0.8843	0.8937
7-methylguanine	3.4954	4.7094	3.8071	4.9816	4.4242	2.2881	2.6172	1.7944	2.0335	1.9151	1.1887	1.8665	1.9152	1.4154	1.6908	1.6324	1.802	0.8855	0.8351	1.1945	0.9289	0.9671	0.9756	0.7741	0.5745	0.5152	0.4693	0.5418	0.4344	0.5964	0.6726
acetylcarnitine (C2)	0.9511	1.1035	0.7455	1.3282	0.8554	2.285	2.5055	2.4294	2.1486	2.2936	1.8985	1.9824	2.0842	1.778	1.7424	1.8553	1.8778	0.7263	0.7536	0.8558	0.9219	0.6148	1.1054	0.8501	0.9068	0.7913	1.0021	0.8505	0.908	0.8818	0.6396
acetylphosphate	0.355	0.5569	0.5505	0.3777	0.5518	0.6759	0.2895	0.6784	0.541	0.5084	0.8255	1.0443	1.184	1.1923	1.171	1.0924	1.2174	0.8767	1.0265	1.13	1.1491	1.4161	1.0856	1.0663	0.8032	1.1615	1.0454	0.6449	0.9706	0.7376	1.6854
aconitate [cis or trans]	0.4712	0.4759	0.4446	0.5571	0.425	0.464	0.2551	0.4764	0.4657	0.5348	0.4945	0.905	0.8437	0.8703	0.8923	0.5842	0.7213	1.1744	1.0912	1.2455	1.1736	1.1612	0.9766	1.0478	2.3266	2.2548	2.0601	2.5105	2.3237	2.2827	2.6177
adenine	0.3673	0.3036	0.3302	0.2852	0.2776	0.3266	0.3425	0.3313	0.3552	0.3326	0.5761	0.433	0.4904	0.3966	0.3969	0.3993	0.4014	1.3607	1.2234	1.2425	1.1113	1.6115	1.0275	0.9725	2.476	2.5584	2.4932	2.1684	2.1833	2.4337	2.9553
adenosine	1.8295	1.8898	1.9737	1.822	2.3452	1.7588	1.8169	1.8406	2.6802	2.0439	0.7124	1.1576	1.1397	1.0211	0.4751	0.9838	1.0162	0.4074	0.4086	0.4793	0.3592	0.4319	0.436	0.3462	0.6538	1.1267	2.4823	1.2086	0.8927	0.7544	1.6241
adenosine 2'-monophosphate (2'-AMP)	0.7193	0.5746	0.6656	0.8436	0.4247	0.4831	0.4524	0.5329	0.3958	0.7269	0.7754	1.076	0.782	1.2965	0.6535	1.0844	1.0946	0.9534	0.7379	0.8234	1.4648	1.3344	1.4575	1.0625	1.0425	0.8648	1.1568	0.8821	1.0468	1.1876	1.4469
adenosine 3'-monophosphate (3'-AMP)	0.8021	0.5123	0.7847	0.7991	0.6181	0.4866	0.6616	0.6421	0.4487	0.6841	0.663	0.752	0.6169	0.8219	0.5203	1.0156	0.9208	1.0704	0.9932	1.2022	1.2554	1.5842	1.3642	0.9148	1.1512	1.0727	1.3513	1.271	1.026	1.2104	1.5588
adenosine 5'-monophosphate (AMP)	24.1723	20.9182	21.8382	27.3086	21.4516	19.4149	22.7373	20.5952	21.8724	24.0014	1.6632	4.3974	2.2298	3.0614	1.8066	5.0122	4.4993	0.885	0.7646	0.9798	0.9699	0.9941	0.9245	0.6736	0.6166	0.6896	0.6265	0.4747	0.6331	0.5899	0.8004
adipate (C6-DC)	5.878	7.021	6.0394	9.2106	1.3157	1.2008	1.3383	1.8344	1.4438	1.8229	0.3944	0.9317	0.9832	1.2397	1.4216	0.9835	1.2929	0.3944	1.0586	1.0447	0.5433	1.1586	0.6084	1.0923	0.6393	0.6439	0.5769	0.3944	0.6231	0.3944	0.7977
adrenoylcarnitine (C22:4)	0.3387	0.5461	0.3387	0.6253	0.3665	0.9261	1.0287	0.6537	0.3387	0.7492	1.202	0.8816	1.0711	0.9229	0.8955	0.656	0.7177	1.4987	1.6824	1.1577	0.9405	1.3424	1.1444	0.7056	1.3613	1.0829	0.9713	1.5747	0.7991	1.2116	0.6103
alanine	1.0914	1.1186	1.0813	1.2244	1.3967	0.8721	0.9775	0.6708	0.813	0.8312	0.9355	1.0058	1.1005	0.8359	1.0382	1.1015	1.1323	1.2515	1.1521	1.3043	1.0494	1.1674	1.0102	1.0147	1.0161	0.9845	0.838	0.7764	0.7521	1.0003	0.9263
alanylglycine	0.9408	1.0682	0.2992	1.7945	0.5364	0.9736	0.3869	0.5981	0.2992	0.7302	0.2992	0.6057	0.8033	1.0623	0.864	0.6964	0.8129	1.1044	1.1112	1.2327	1.3916	1.0086	1.3177	0.2992	0.7102	0.9092	1.2004	0.954	1.2316	0.5641	1.5913
allantoin	5.6717	8.5533	6.194	7.4723	4.9327	2.4782	3.1858	2.5892	1.772	2.4833	1.3259	2.0547	1.8817	1.9117	1.9466	2.3416	2.3781	0.854	0.7485	0.9068	1.0745	0.9918	0.7155	0.5413	0.4092	0.3457	0.4188	0.3499	0.3472	0.4877	0.4804
allo-threonine	0.5105	0.4843	0.4664	0.7822	0.3665	0.7536	0.7802	0.7002	0.6509	0.7102	0.9989	1.076	1.1825	1.1536	1.114	1.2833	1.455	1.4633	1.2053	1.4636	1.4666	1.5413	1.1594	1.2126	0.9193	0.7678	0.7268	0.8124	0.6911	1.0661	1.0011
alpha-hydroxyisovalerate	2.5459	3.4162	3.268	4.7041	2.8612	1.3169	2.0241	1.0678	1.3726	1.6819	0.4656	1.1222	0.9647	0.91	1.1247	1.173	1.1662	1.1547	0.8396	0.5832	1.0734	1.0022	1.0823	1.0161	0.2062	0.3261	0.3273	0.3244	0.2062	0.2774	0.2062
alpha-ketoglutarate	1.69	1.3346	1.3511	1.5034	1.1125	1.2784	1.7792	1.2052	1.6677	1.5205	0.5521	1.1078	1.8277	1.7346	1.2763	1.4209	2.0216	1.0245	0.9396	1.0242	0.8866	1.0146	0.9346	0.7729	0.6373	0.657	0.6717	0.6565	0.5547	0.6525	0.6829
alpha-tocopherol	0.0108	0.0396	0.0249	0.0557	0.0449	0.1575	0.1508	0.1069	0.1355	0.1615	0.686	0.1664	0.2083	0.1365	0.2491	0.2073	0.1261	1.1629	0.8913	1.4542	1.0824	1.3282	1.0974	0.9216	2.2654	2.3917	2.1097	2.0281	1.862	2.3455	2.3389
arabinose	0.4014	0.7156	0.4026	0.8302	0.3508	0.3744	0.4321	0.362	0.3045	0.4217	1.0915	1.2404	1.2576	1.1403	1.3042	1.2906	1.4292	1.4464	1.0594	1.3925	1.2637	1.3156	1.2469	0.9908	0.8333	0.8984	0.8775	1.0092	0.6389	0.9835	1.0301
arabitol/xylitol	0.6972	0.8702	0.6251	1.255	0.554	0.4215	0.5946	0.3918	0.3896	0.5653	0.9032	0.9412	0.8715	0.9571	0.9895	1.0687	0.9761	1.3608	1.2519	1.3	1.1616	1.0226	1.2052	1.0392	1.2617	1.0105	1.2392	1.5237	0.8891	1.5585	1.3541
arabonate/xylonate	0.9985	1.1884	0.8317	1.7723	0.9151	0.5733	0.9038	0.5928	0.6104	0.8364	0.9001	1.1022	1.0749	0.9968	1.023	1.2879	1.2994	1.526	1.2715	1.6122	1.2087	1.375	1.1899	0.9209	0.978	0.7698	0.8287	0.8892	0.6121	1.0635	0.9557
arachidonoylcarnitine (C20:4)	0.0586	0.0534	0.0343	0.0897	0.0482	0.2289	0.3027	0.2029	0.2319	0.207	1.7328	1.1665	1.2207	1.0196	0.9093	0.7489	0.873	1.7004	1.5494	1.6104	1.5226	1.6473	1.3195	1.2449	1.1927	0.7815	0.9323	0.9445	0.8828	0.8807	0.8777
argininate	0.1377	0.2438	0.1619	0.3081	0.2005	0.1806	0.269	0.1814	0.2514	0.2546	0.1857	0.3015	0.3442	0.2133	0.393	0.4153	0.4638	0.9583	1.2179	1.6139	1.1051	1.208	1.0957	1.0216	1.5513	1.8395	1.2471	1.0069	1.0046	1.5474	1.5658
arginine	0.5145	0.6371	0.4692	0.7196	0.5137	0.6678	0.6157	0.5327	0.5326	0.5889	0.7369	0.935	0.9725	0.8368	0.9395	0.9795	1.0205	1.275	1.2268	1.4812	1.3502	1.5239	1.2473	1.1798	1.2072	1.1113	1.0235	0.881	0.9178	1.1128	1.3333
argininosuccinate	0.5989	0.777	0.4975	0.8624	0.5077	0.6885	0.7875	0.6224	0.629	0.8253	0.9233	1.3211	1.2373	1.0242	1.1265	1.3625	1.3085	1.9972	1.5629	2.5328	2.1087	2.4162	1.6382	1.4497	0.9555	0.8909	0.81	0.6581	0.5831	1.0246	1.2458
asparagine	0.9172	1.1982	0.8584	1.1541	0.8805	0.9219	0.9992	0.8266	0.8481	1.0421	1.1535	1.1272	1.1229	0.941	1.2674	1.3326	1.422	1.3406	1.0675	1.3089	1.1991	1.4004	1.3333	0.9543	1.0697	0.8437	0.7577	0.7785	0.654	0.825	0.9428
asparaginylalanine	1.8137	2.0424	1.3455	1.7075	1.1778	1.8954	1.1407	1.4453	0.8869	1.3213	1.1507	0.8696	1.1227	1.1539	1.1591	1.8594	1.2472	0.7188	0.7912	1.2169	1.2497	1.2403	1.2991	0.9712	0.9603	0.5823	0.8501	0.4761	0.6307	0.4439	0.9758
asparaginylglutamate	0.663	1.2709	0.3328	0.988	1.0766	0.9125	0.9432	0.7135	0.7051	0.5475	1.1185	1.5293	1.7618	1.4825	1.4359	1.2992	1.6622	1.4662	0.9014	1.1236	0.9947	1.1551	1.0956	1.2009	0.7601	0.7771	0.642	0.3937	0.6175	0.3328	0.3328
aspartate	0.4774	0.566	0.444	0.7407	0.4871	0.5377	0.5268	0.4191	0.4638	0.4911	0.7723	0.8259	0.8577	0.9249	0.9954	1.0002	0.9998	1.4976	1.5057	1.7279	1.7389	1.7416	1.6128	1.3735	1.0761	0.9846	1.1144	1.065	0.9024	0.9855	1.356
aspartylaspartate	0.3856	0.5284	0.2955	0.6411	0.6039	0.4324	0.5903	0.3448	0.461	0.4391	0.7401	0.88	0.9314	0.7863	0.9936	1.1391	1.2792	1.422	1.4138	1.8509	1.3989	1.7749	1.2039	1.2357	1.5918	1.2513	0.8878	0.9362	0.9142	1.2008	1.243
aspartylglycine	0.6081	1.0847	0.8408	1.3625	1.2413	0.6525	0.9927	0.6163	0.7928	0.7186	1.2731	0.8857	1.3429	1.0198	1.4522	1.637	1.6604	1.3851	1.3361	1.9076	0.9998	1.6465	1.1567	1.3258	1.2527	0.7742	0.6592	0.5105	0.4456	0.943	0.7366
azelate (C9-DC)	1.5546	1.7201	1.0622	8.6299	0.9866	0.8554	1.1041	1.6245	1.4508	1.1034	0.6233	0.6139	0.8922	0.9156	0.8105	0.8143	0.9481	1.1224	1.3764	1.5442	1.2183	1.1412	1.2077	0.8578	0.9377	0.8764	0.9319	1.0117	0.9791	1.1897	1.0038
benzoate	1.2001	1.1232	1.3314	1.4585	1.2508	0.8052	0.9029	0.8871	0.6601	1.126	0.6731	0.9408	0.6782	0.5307	0.8579	0.8181	3.2032	1.1845	0.9651	3.5137	0.6996	1.2667	1.0249	0.8916	0.7934	0.8357	1.1622	1.3362	0.7532	1.1314	1.0337
beta-citrylglutamate	5.8356	6.4565	5.6157	7.5442	5.6432	5.6682	5.7195	4.9544	5.1792	5.65	1.7271	1.7883	1.653	1.7713	1.9321	2.1068	2.1428	0.9136	0.8291	0.9799	0.9519	0.9983	1.0198	0.9338	0.4839	0.4087	0.3882	0.4015	0.3663	0.4813	0.5003
beta-hydroxyisovalerate	1.2004	1.3474	1.1435	2.082	1.0131	1.0632	1.243	0.9715	1.0891	1.2187	0.8398	1.091	1.3606	0.8827	1.1529	0.9941	1.1734	1.1425	1.1036	1.1521	0.8303	1.2406	0.9615	0.8985	0.6428	0.5303	0.6962	0.7098	0.5789	0.6889	0.7489
betaine	0.6406	1.0254	0.6728	1.1569	0.6853	0.7851	0.9608	0.758	0.9587	0.8751	0.8665	1.2923	1.1647	1.1175	1.1382	1.1913	1.2375	1.3712	1.3756	1.7346	1.3606	1.4894	1.1991	1.0249	0.7823	0.7397	0.732	0.5036	0.5963	0.8753	1.0121
betaine aldehyde	0.1947	0.1281	0.1281	0.1281	0.1588	0.3093	0.2852	0.3979	0.1281	0.303	0.3967	0.3149	0.2374	0.4036	0.522	0.3236	0.3325	1.6014	1.4462	2.0838	1.6204	2.1039	1.3819	0.9875	1.0575	1.064	1.0565	0.9463	1.0765	0.8523	1.9977
butyrylcarnitine (C4)	3.4071	2.5581	1.9799	1.9028	2.4704	11.1646	11.0165	7.7001	7.5984	7.3581	4.3223	4.3114	3.5334	3.7608	4.3873	3.5663	3.5507	0.7616	0.5338	0.6064	0.9815	0.3817	0.9445	0.5977	0.4343	0.6141	0.6313	0.0878	0.4674	0.0878	0.0878
C-glycosyltryptophan	0.5356	0.6051	0.4752	0.7282	0.4842	0.5728	0.6328	0.5676	0.5545	0.5751	1.0221	1.0322	0.9225	1.0698	0.9466	1.1602	1.1825	1.5568	1.4185	1.8753	1.6488	1.8	1.5279	1.293	0.9305	0.7533	0.8687	1.0167	0.6722	1.0765	1.0142
caprate (10:0)	0.9205	1.1272	0.9397	1.3792	1.1825	1.2558	1.2422	1.3036	1.0594	0.9524	0.8414	1.0263	1.2675	0.9309	1.1585	1.0071	1.1711	0.9938	1.2435	1.1542	1.026	1.2612	1.3198	1.0338	0.8405	0.9357	0.8409	0.6949	0.705	0.7526	1.0381
caproate (6:0)	1.0103	1.2972	1.3979	1.7837	0.9897	1.1362	0.9374	1.2807	0.8185	1.0917	0.4186	1.1544	1.2218	1.0923	1.3821	1.3754	1.3313	1.3574	0.8181	1.2602	1.0266	1.2094	1.0967	0.8915	0.3205	0.3739	0.3819	0.5379	0.4282	0.5291	0.5349
carboxyethyl-GABA	0.6409	0.7258	0.4498	0.7287	0.3231	0.7491	0.6031	0.9302	0.2123	0.9796	0.5732	0.7362	0.7533	1.1805	1.0377	0.9368	1.134	0.9469	1.0864	1.4166	1.2045	1.284	1.2993	1.0985	1.3046	1.0006	1.0127	0.7995	1.1988	0.9634	1.2688
carnitine	0.2179	0.2267	0.2042	0.2695	0.2107	0.9268	0.8864	0.8214	0.8449	0.8547	1.2325	1.2781	1.3492	1.3114	1.1595	1.0618	1.239	1.0554	1.0383	1.3429	1.2256	1.2468	1.1438	0.9479	0.6789	0.6837	0.6655	0.6782	0.6378	0.6433	0.6726
chiro-inositol	1.0947	1.6183	1.1635	1.6279	1.1716	0.3276	0.3241	0.3605	0.2571	0.3297	0.2586	0.2853	0.2865	0.1356	0.4114	0.3777	0.4614	1.2186	1.3984	1.7637	1.2091	1.8609	1.2625	1.1768	0.7887	1.0632	0.8351	0.7376	0.815	1.1659	1.2521
cholesterol	0.1398	0.1892	0.1338	0.2046	0.1334	0.2359	0.2356	0.1865	0.1795	0.2204	0.5633	0.635	0.6471	0.5611	0.6823	0.7094	0.6928	1.1968	1.179	1.2632	1.326	1.3814	1.1221	0.9844	1.2529	1.1079	1.1221	1.0442	0.9612	1.0939	1.3312
choline	0.9157	1.1017	0.8439	1.1115	0.775	0.943	0.9875	0.9423	0.9155	1.0125	0.7628	0.9611	0.9707	0.9774	1.0607	1.2182	1.1956	1.1868	1.2455	1.4187	1.3413	1.3969	1.3676	1.1238	1.0378	0.9229	0.915	0.8568	0.8649	0.9476	1.0536
choline phosphate	1.0117	1.1235	1.0151	1.2757	0.8609	0.9346	0.9217	0.8911	0.8659	0.9587	0.8409	0.9313	0.8965	0.916	1.0202	0.9903	1.0421	1.131	1.1138	1.219	1.18	1.2606	1.1125	1.0379	1.0282	0.9867	0.9604	0.9457	0.9439	0.9317	1.0484
citrate	0.3289	0.3335	0.2596	0.3738	0.2847	0.3683	0.4192	0.4316	0.3934	0.4404	0.5691	0.8962	0.8111	0.8847	0.9861	0.7753	0.7268	1.0622	1.0403	1.1661	1.1046	1.137	0.9557	1.04	2.1488	2.0131	1.941	2.3166	2.1157	1.9948	2.4489
citrulline	1.2989	1.2743	1.2245	1.525	1.3168	1.2423	1.3416	1.099	1.2146	1.2751	1.111	1.1628	1.1559	1.0113	1.0033	1.164	1.2816	0.8283	0.9623	0.9529	0.9112	0.9408	0.8633	0.8178	0.4155	0.4451	0.3403	0.4003	0.3994	0.4341	0.4632
coenzyme A	0.1179	0.2293	0.1648	0.2259	0.2433	0.2452	0.2215	0.1808	0.1384	0.301	0.4975	0.6536	0.6116	0.6345	0.708	0.5599	0.5606	1.298	0.833	1.2713	1.3569	1.5031	1.2661	0.9829	1.2752	1.2718	1.2105	1.3978	1.4484	1.5497	1.7552
creatine	0.6642	0.7194	0.6851	0.8163	0.6814	0.7691	0.7636	0.742	0.7003	0.7889	0.8572	0.926	0.929	0.9072	0.8965	0.9422	0.9911	1.0917	1.0341	1.1253	1.1085	1.1806	1.0771	1.015	1.0354	1.0402	1.014	1.0258	0.9881	1.0297	1.1214
creatinine	0.6101	0.7362	0.6921	0.8268	0.7084	0.7098	0.7338	0.6465	0.6942	0.6771	0.7869	0.8744	0.9216	0.8374	0.9392	0.9182	1.0599	1.2514	1.2782	1.422	1.3914	1.3862	1.1973	1.1155	1.3701	1.0654	1.0274	0.9726	0.9583	1.2068	1.3245
cystathionine	7.828	8.6137	7.559	11.3531	8.1306	5.1169	4.9224	3.8518	4.4881	5.7634	1.3887	1.8749	1.9958	1.4405	1.5329	1.6007	2.0352	0.7547	0.6644	1.0052	0.8481	1.1187	0.9399	0.738	0.5668	0.4885	0.4558	0.381	0.3914	0.5606	0.6933
cysteine	0.0839	0.1539	0.0876	0.1854	0.1204	0.1417	0.1233	0.0865	0.1348	0.1176	0.6398	0.2851	0.34	0.2307	0.4026	0.3278	0.377	1.0636	1.0773	1.4931	1.1704	1.3851	1.037	0.9961	1.4642	1.4288	1.1868	1.0039	1.0881	1.4013	2.0783
cysteine sulfinic acid	0.5275	1.1401	0.5566	1.4547	0.7285	0.3769	0.7584	0.3386	0.2125	0.2787	0.2125	0.8247	0.788	0.8309	0.7383	0.8977	1.0008	2.2148	2.0978	1.5724	1.9914	1.4019	1.4915	1.3453	1.2284	0.7799	1.1392	1.2735	0.9156	1.1135	0.6846
cysteine-glutathione disulfide	0.789	0.9452	0.7853	1.1322	0.6046	0.3172	0.41	0.3116	0.3817	0.4642	0.2341	0.4236	0.4495	0.494	0.4839	0.5121	0.5298	1.1699	1.3624	1.4483	1.1833	1.071	1.1104	0.9329	2.1618	1.6838	2.0779	1.7469	1.7579	1.6974	1.9392
cytidine	0.9967	1.2175	0.9607	1.3482	0.9652	0.9468	0.9419	0.8125	0.8374	1.0165	0.8933	1.0298	1.0661	1.0051	1.0723	1.0968	1.2417	1.182	1.1885	1.3487	1.2829	1.4013	1.291	1.1273	0.8556	0.8117	0.7869	0.7167	0.6778	0.8123	0.984
cytidine 2',3'-cyclic monophosphate	4.1734	5.5521	3.9007	6.9319	4.6106	1.0513	1.3531	1.0275	1.036	1.3946	0.4941	0.6273	0.9692	0.8804	1.1347	1.2555	1.4994	0.9591	1.1088	1.4888	1.5757	1.9243	1.3196	0.9835	0.3911	0.4669	0.4174	0.5127	0.4365	0.5894	0.8461
cytidine 5'-diphosphocholine	0.6774	0.8768	0.4923	0.6929	0.6271	0.9991	1.0546	0.6736	0.6321	0.7938	1.2469	1.2435	1.3269	1.1788	1.3306	1.3621	1.1784	1.4975	1.0124	1.3088	1.1515	1.3903	1.0691	0.9357	0.8847	0.8233	0.7958	0.9371	0.7905	1.0597	0.9842
cytidine 5'-monophosphate (5'-CMP)	1.9849	2.452	2.1104	2.8471	2.319	1.5808	1.7153	1.6041	1.7486	1.9177	1.1404	1.1858	1.0623	1.1896	0.9925	1.3029	1.3724	0.9916	0.7588	1.0975	0.8809	1.0121	0.9307	0.7701	0.4472	0.4073	0.4267	0.4279	0.3674	0.468	0.4907
cytidine 5'-monophospho-N-acetylneuraminic acid	0.7684	0.902	0.6374	0.9747	0.6159	0.6748	0.7767	0.6052	0.4927	0.6569	1.0253	1.3007	1.2604	1.1781	1.2154	1.3984	1.4686	1.5022	1.3345	1.539	1.5855	1.688	1.3261	1.1324	0.7247	0.6696	0.6147	0.685	0.6069	0.7495	0.8254
cytidine-5'-diphosphoethanolamine	0.6233	0.8329	0.6416	1.0016	0.6021	0.8797	0.9109	0.6263	0.6456	0.7721	1.1833	1.1827	1.1865	1.1438	1.2632	1.3514	1.3749	1.3679	0.9842	1.3458	1.2808	1.2801	1.2371	1.0336	0.8515	0.8461	0.7478	0.9006	0.6676	1.0363	0.8308
cytosine	2.9335	3.0155	3.3123	3.3402	2.7091	1.643	2.0152	1.8475	1.9402	2.3365	0.193	0.6515	0.7205	0.7692	0.6239	0.9975	0.754	1.0318	0.9291	1.1925	1.2257	0.8396	1.2722	0.9951	0.2584	0.193	0.193	0.193	0.193	0.193	0.193
dehydroascorbate	0.4914	0.5825	0.3932	0.651	0.5699	0.7535	0.7039	0.5828	0.6133	0.7565	0.7474	0.9867	0.9926	1.1204	1.1465	1.1155	0.9501	1.1724	1.1297	1.0889	1.2355	1.0759	1.0534	1.117	0.8524	0.9684	0.9625	1.3924	0.9896	1.0226	1.0837
deoxycarnitine	0.3782	0.4972	0.4627	0.5727	0.4221	0.4237	0.5047	0.3855	0.4556	0.4404	0.9245	1.1765	1.1557	1.1681	1.0372	1.1111	1.2839	2.0451	1.8116	2.3774	1.9716	1.9106	1.9531	1.603	0.9029	0.8006	0.8904	0.9671	0.5262	0.8429	0.7847
desmosterol	1.4787	1.9602	1.3618	2.1281	1.3986	3.1586	3.2315	2.4189	2.3617	2.8289	1.2625	1.3761	1.3882	1.4934	1.6327	1.7391	1.3926	0.8581	0.8444	0.9262	0.9443	1.0694	0.7784	0.6488	0.7177	0.5767	0.4632	0.4485	0.4349	0.6599	0.7124
dihydroxyacetone phosphate (DHAP)	0.1644	0.2551	0.1571	0.2171	0.1735	0.2598	0.2645	0.2408	0.2355	0.371	0.8691	0.9804	0.8241	0.9248	1.0004	1.002	0.9348	1.1044	0.9721	1.3601	1.1597	1.0319	1.2588	1.2056	1.265	1.7154	1.3061	1.2821	1.258	1.4081	1.5498
dimethylarginine (SDMA + ADMA)	2.3255	3.002	2.1166	3.2441	2.1849	1.5816	1.47	1.2114	1.2608	1.2882	0.7833	0.9922	1.038	0.8856	0.9477	1.1324	1.1451	1.0685	1.0259	1.3254	1.2388	1.3754	1.2032	0.925	0.7147	0.6917	0.6225	0.5472	0.5764	0.6202	0.8595
dimethylglycine	2.6499	5.3504	4.0272	4.7199	3.1009	2.5232	4.3418	2.4194	2.3935	2.8526	1.7829	3.2063	2.8224	2.5966	2.4578	3.4869	2.8455	0.7131	0.6282	0.8065	0.9971	0.7729	1.0308	0.8512	0.273	0.3273	0.2638	0.3136	0.283	0.3382	0.4254
dopamine 3-O-sulfate	1.2779	1.8008	1.2113	1.9666	0.9721	1.1315	1.1439	1.0623	0.9187	1.9623	0.3352	0.6865	1.0237	1.5501	1.5885	1.2187	0.9966	1.0193	0.9834	1.5787	1.4317	1.361	1.1832	0.8611	0.4039	0.3489	0.4399	0.3514	0.3081	0.5616	0.4063
eicosanoylsphingosine (d20:1)	0.0419	0.0723	0.0389	0.0677	0.0403	0.0661	0.0802	0.0651	0.0428	0.0691	0.5703	0.627	0.6195	0.5512	0.6359	0.5973	0.602	1.0882	1.2305	1.1916	1.3001	1.2483	1.0725	1.0235	1.4163	1.1591	1.2196	1.2002	1.0901	1.1051	1.2891
eicosenoylcarnitine (C20:1)	0.1688	0.1778	0.1081	0.1969	0.1034	0.276	0.3226	0.1668	0.1812	0.2199	0.583	0.4538	0.6017	0.4155	0.44	0.4992	0.3892	1.3255	1.1768	1.1907	1.143	1.4753	0.9936	0.8797	1.4415	1.1682	1.0935	1.2089	1.1287	1.1849	1.0864
ergothioneine	0.4526	1.8607	0.8062	1.3428	1.0098	1.6225	2.2634	1.4931	0.8059	1.401	1.9738	1.5443	1.5302	0.9445	0.685	0.892	0.9902	0.3723	0.3798	1.1985	0.2329	1.3089	0.3127	0.2866	2.0726	1.5017	0.8899	1.1753	1.1192	1.2526	2.2899
erythritol	1.2833	1.4612	1.1565	2.2892	1.101	0.4703	0.9144	0.6916	0.7377	0.6413	0.4703	0.9934	1.0844	0.8823	0.9267	1.0619	1.355	1.4662	1.1487	1.2141	1.2178	1.2116	1.2351	0.873	0.8809	0.863	0.7313	0.6559	0.6155	1.1784	1.4557
erythronate	1.0153	1.3532	1.0337	1.681	1.0569	0.5412	0.6943	0.5227	0.5241	0.6351	0.78	0.7741	0.8183	0.7684	0.9065	0.901	0.901	1.5915	1.2493	1.5589	1.4574	1.4253	1.2764	1.1143	1.0995	0.9123	0.9098	1.0677	0.7784	1.0223	1.1204
ethylmalonate	1.0387	1.3056	0.9082	1.6051	0.6584	1	1.1364	0.4484	0.7921	0.8875	0.9349	1.2141	1.1787	1.3087	1.2426	1.1472	1.1744	2.1155	0.991	1.467	1.3356	1.8913	0.7605	0.7123	0.803	1.0889	0.7429	0.4484	0.4484	0.6436	1.322
flavin adenine dinucleotide (FAD)	0.4992	0.6217	0.5351	0.7439	0.5112	0.6157	0.6583	0.5537	0.643	0.6075	0.9975	0.8863	0.8357	1.0064	0.8289	1.0614	1.1367	1.2304	1.2585	1.5765	1.4514	1.3014	1.3266	1.2508	1.1211	0.8826	0.981	1.0025	0.794	1.0936	1.2315
flavin mononucleotide (FMN)	0.2087	0.2355	0.1991	0.3291	0.2304	0.3871	0.344	0.2277	0.3238	0.3497	0.6627	0.6267	0.8003	0.849	0.9341	1.03	0.9603	1.3049	1.4587	2.0605	1.7737	1.8672	1.9735	1.5922	1.2291	0.8493	1.1077	1.2342	0.97	1.1974	1.8883
formiminoglutamate	2.1197	2.8368	1.3122	2.8982	1.5143	0.7234	1.0349	0.735	0.9728	0.7575	1.0817	1.6434	1.5534	1.2221	1.4915	1.9166	2.7645	1.1122	0.8511	1.3628	0.7926	1.0088	0.9912	0.839	0.6477	0.668	0.3897	0.3003	0.4404	0.6254	0.5617
fructose	1.3312	1.5125	1.1073	2.3294	1.0577	0.8167	0.8023	0.9275	0.9832	1.1411	0.5319	2.1535	0.9884	0.6094	1.227	0.8766	1.0116	0.9127	0.8567	1.4272	1.2328	1.3344	1.4426	1.0241	1.0334	1.2269	0.897	0.8436	0.7534	0.9838	1.2072
fructose 1,6-diphosphate/glucose 1,6-diphosphate/myo-inositol diphosphates	0.1967	0.3246	0.2076	0.3062	0.2362	0.4532	0.4829	0.476	0.4225	0.5444	0.7113	0.8498	0.5552	1.2158	0.6512	1.1939	0.9637	0.9194	0.9671	0.7281	1.3608	0.9593	1.247	1.3208	1.8132	1.8444	1.9085	1.2847	1.3423	1.8353	1.9219
fumarate	0.7398	0.9439	0.7127	1.0392	0.755	1.025	1.0325	0.723	0.7457	0.9475	0.93	1.1609	1.2853	0.9678	1.2339	1.202	1.2325	1.4328	1.3741	1.4466	1.4059	1.5268	1.3675	1.1821	0.8963	0.9123	0.8543	0.9087	0.7629	0.9525	1.0221
galactitol (dulcitol)	0.8723	1	0.7355	1.1636	0.8866	1.1172	1.0667	0.8911	0.8696	1.0293	1.1658	1.3756	1.178	1.3035	1.6473	1.8306	1.718	1.3108	0.9225	1.2222	1.0717	1.3324	1.2498	0.9323	0.84	0.9614	0.8318	0.7937	0.6012	0.787	1.0187
gamma-aminobutyrate (GABA)	0.2556	0.3399	0.2524	0.3129	0.2609	0.4552	0.5205	0.4345	0.4553	0.4839	0.7346	0.7955	0.8328	0.7584	0.8726	0.8656	0.8863	1.2368	1.111	1.32	1.2029	1.2844	1.1636	1.0295	1.0821	0.9889	1.0615	1.0335	0.9574	1.0877	1.1903
gamma-glutamylglutamate	0.2124	0.2939	0.2333	0.3658	0.2769	0.2301	0.3525	0.22	0.2634	0.288	0.4727	0.4647	0.4886	0.3444	0.5301	0.5276	0.5819	1.8326	1.6154	1.902	1.2315	1.5264	1.1353	1.5482	2.031	1.4276	1.2123	1.0844	1.1909	1.7247	1.3813
gamma-glutamylglutamine	0.8391	1.3042	0.7983	1.4393	0.8126	0.3437	0.6898	0.3102	0.4878	0.6389	0.2791	0.2386	0.2075	0.2081	0.2766	0.2851	0.2954	1.043	0.9675	1.2088	0.9698	1.0293	1.1404	0.9768	1.4831	1.0761	1.1378	1.3482	1.029	1.4738	1.4079
gamma-glutamylglycine	0.3196	0.7254	0.4082	0.8499	0.3286	0.0932	0.2032	0.1782	0.0799	0.0773	0.0582	0.0463	0.0463	0.0546	0.0463	0.1055	0.0463	1.1647	1.0407	1.3013	1.212	1.301	0.9051	0.7279	1.5704	0.9177	1.2027	1.0886	0.9593	1.3525	1.3466
gamma-glutamylleucine	0.6939	1.1672	0.9536	1.4448	1.0394	0.3896	0.5132	0.242	0.3451	0.482	0.2312	0.2312	0.4325	0.2312	0.4606	0.6131	0.407	1.4483	0.9991	1.7851	1.4613	1.3743	1.2451	1.0419	1.2876	0.9024	0.8527	0.7762	0.6255	1.0541	1.2377
gamma-glutamylphenylalanine	0.2966	0.4331	0.2966	0.2966	0.2966	0.2966	0.2966	0.2966	0.2966	0.2966	0.2966	0.2966	0.2966	0.2966	0.3742	0.3677	0.2966	1.4542	1.1638	1.7361	1.2505	1.1142	0.9009	1.0768	1.04	0.7283	0.8179	0.6423	0.5098	1.0819	1.2482
gamma-glutamylthreonine	0.4566	0.7768	0.6801	0.8153	1.1754	0.5903	0.9365	0.4803	0.7835	0.6362	0.6822	0.8947	1.0855	0.5476	1.1087	1.1323	1.2844	1.6591	1.6591	2.024	1.0871	1.524	1.0985	1.43	1.7258	1.4138	0.6777	0.5656	0.87	1.4601	1.4181
gamma-glutamylvaline	1.3993	2.2744	1.6833	2.5834	1.7994	0.6298	0.7989	0.4	0.5866	0.9881	0.3245	0.2526	0.6357	0.4265	0.7621	0.6012	0.7181	1.2268	1.3111	1.6487	1.2632	2.0129	1.3351	1.2201	0.5298	0.9111	0.8913	0.6827	1.0057	0.7819	1.247
gamma-tocopherol/beta-tocopherol	0.1748	0.4123	0.1748	0.5682	0.3586	0.1748	0.2141	0.1748	0.2273	0.226	1.4178	0.6055	0.479	0.2009	0.6361	0.6823	0.3703	2.1536	1.7236	2.3416	1.7523	2.1346	1.9601	2.0019	0.8129	1.0292	0.8294	0.6166	0.8742	0.9708	1.3941
gluconate	0.7433	1.5306	0.7539	1.3645	0.8212	2.3782	2.6428	1.7587	1.9466	1.3225	1.0753	1.5114	1.2308	1.1214	1.6129	3.0625	1.7029	0.9752	1.5501	1.3603	1.1024	1.1764	0.9923	0.8707	0.4205	0.439	0.4219	0.2755	0.2687	0.4668	0.441
glucose	1.0015	1.5041	0.9985	1.3232	1.2622	0.8028	0.6627	0.9133	0.9541	0.8943	0.6198	1.3001	1.134	1.0732	1.6637	1.4578	1.6435	1.0641	0.9153	1.9865	1.5315	1.311	1.5586	1.2433	0.553	0.9322	0.6906	0.3501	0.4766	0.6933	0.8831
glucose 6-phosphate	0.118	0.1866	0.157	0.1122	0.2204	0.1621	0.247	0.2081	0.2654	0.1949	0.9592	1.3866	1.3265	0.7283	1.5753	1.6097	1.876	1.5845	1.171	2.2857	1.3096	1.4536	1.1072	1.2415	1.0324	1.1799	0.4378	0.3675	0.433	1.0368	0.6981
glucuronate	2.734	3.349	2.5955	4.2072	3.1044	1.9936	2.2921	1.8374	2.0501	2.1045	0.6557	1.0087	1.0016	0.863	1.158	1.0912	1.2288	1.0101	1.0614	1.3676	1.1698	0.9932	0.9152	0.8216	0.5501	0.5674	0.4503	0.5515	0.3802	0.301	0.6868
glutamate	0.6555	0.7084	0.6181	0.8339	0.6583	0.6795	0.6837	0.6197	0.5909	0.7225	0.8395	0.9386	0.9255	0.9835	0.9357	1.0388	1.0209	1.2224	1.1938	1.2785	1.2932	1.3321	1.3004	1.1394	1.0582	0.9892	1.0036	0.9964	0.9334	1.0423	1.1338
glutamate, gamma-methyl ester	0.5408	0.7538	0.5705	0.7204	0.7002	0.6308	0.6137	0.4954	0.535	0.5131	0.8331	0.8141	0.8705	0.7219	1.0574	0.7373	0.7544	0.9321	1.0488	1.701	1.1601	1.2626	1.156	1.0906	1.1322	1.6767	0.9922	1.0459	1.0908	1.2382	1.464
glutamine	0.8291	0.9929	0.7517	1.1269	0.6586	0.669	0.6665	0.5197	0.515	0.7201	0.7733	0.8004	0.7987	0.8213	0.8237	0.8692	0.8791	1.2598	1.2049	1.3281	1.2446	1.3525	1.2573	1.0794	1.1444	1.0336	0.9941	0.9378	0.9789	1.0314	1.2995
glutaminylglutamate	1.0022	1.0738	0.9533	1.4949	1.1947	0.9838	1.0938	0.8862	1.1788	1.0189	0.6008	1.4592	1.4187	1.2326	1.3188	1.5006	1.6603	1.1799	1.1859	1.0505	0.8506	1.0427	0.9225	1.0268	0.8086	0.7882	0.7176	0.6952	0.5298	0.8409	0.7012
glutarate (C5-DC)	1.1025	1.5192	1.1196	1.6534	0.7816	0.6548	0.7119	0.5281	0.4621	0.84	0.413	0.8092	1.1582	0.9149	1.0547	1.0051	0.8122	1.4155	1.4518	1.504	1.2427	1.4014	1.3736	0.9949	0.927	0.8436	1.1107	0.923	0.8259	0.9677	1.1607
glutathione, oxidized (GSSG)	0.9239	1.0926	0.7868	1.477	0.8981	0.9493	0.7819	0.6668	0.7378	0.8826	2.0362	1.0616	1.2253	0.7181	1.3787	1.1483	1.5149	1.3266	1.097	1.5831	1.2437	1.4771	1.4976	1.2167	0.9059	0.9579	0.8844	0.7504	0.9799	0.9505	1.1467
glutathione, reduced (GSH)	0.4525	0.5628	0.5286	0.6394	0.748	0.7239	0.7739	0.503	0.7649	0.6582	1.1625	0.9341	0.89	0.8557	0.9055	1.0229	1.0355	1.5394	1.383	2.1256	1.4963	1.7429	1.3569	1.5738	0.7955	0.917	0.5962	0.596	0.6899	1.0061	1.2631
glycerate	1.2903	1.5428	1.3369	2.0265	1.2396	1.0518	1.2311	1.0628	1.0179	1.2641	0.418	0.8689	0.9704	0.9433	0.9638	1.0887	1.323	1.1582	1.0877	1.1604	1.2	1.1658	1.0986	0.921	0.6491	0.5864	0.5714	0.6652	0.477	0.8116	0.5449
glycerol	0.4664	0.5913	0.3545	0.4371	0.3978	0.6225	0.4949	0.4839	0.4287	0.5626	0.6822	0.8982	0.9066	0.8851	0.9069	1.1988	0.9489	1.5047	1.1652	1.5166	1.307	1.7428	1.4843	1.2322	1.3045	1.1387	0.9282	0.9907	0.9429	1.2234	1.2147
glycerol 3-phosphate	8.2486	7.132	5.9847	8.7593	6.4722	3.626	3.8174	4.0869	3.0688	4.0011	0.4764	0.8986	1.1533	1.013	1.3699	1.4646	1.9084	0.8109	0.8446	0.8756	0.9126	1.0201	1.0346	0.8451	1.0572	0.9211	0.9276	0.9294	0.9715	0.9447	1.12
glycerophosphoethanolamine	0.6576	0.742	0.6252	0.7017	0.7237	0.6498	0.6197	0.5793	0.5647	0.6613	0.546	0.6108	0.641	0.6929	0.6147	0.7684	0.7035	1.0402	1.0259	1.1118	1.0893	1.1406	1.0813	0.9656	1.5306	1.6124	1.4836	1.3564	1.4373	1.3518	1.7233
glycerophosphoglycerol	0.6745	0.7505	0.6419	0.713	0.7105	0.9045	1.0049	0.7866	0.934	0.9517	0.8068	0.7691	0.7921	0.7787	0.7333	0.8604	0.8705	1.2204	1.2598	1.2946	1.2183	1.3407	1.2911	1.3108	1.1752	1.0283	0.9951	1.1249	1.104	1.1316	1.1773
glycerophosphoinositol	0.3345	0.443	0.2634	0.4213	0.3786	0.5083	0.5991	0.4803	0.5563	0.5783	0.7492	0.7812	0.84	0.6606	0.7918	0.9147	0.9759	1.2531	1.2409	1.3728	1.3337	1.289	1.1135	1.159	1.3146	1.1664	0.857	1.0742	1.051	1.1981	1.0866
glycerophosphorylcholine (GPC)	1.7494	1.9594	1.5627	1.7491	1.8887	1.2657	1.1424	1.0995	1.1502	1.3917	0.5059	0.3433	0.3264	0.4781	0.3245	0.7004	0.6256	0.8965	0.7579	0.9076	0.9276	0.9246	1.0339	0.8397	1.8465	1.884	1.6918	1.6558	1.7496	1.6665	2.131
glycerophosphoserine	0.1895	0.2321	0.1467	0.302	0.2664	0.3378	0.2917	0.2907	0.3055	0.336	0.9766	1.0813	0.9552	0.8576	1.2125	0.9942	0.8922	1.315	1.0921	1.4197	1.0052	1.2765	0.949	0.8449	1.1784	1.219	1.0344	0.9948	1.078	1.2372	1.3803
glycine	0.9385	1.1959	0.9218	1.3045	0.8725	0.6991	0.7488	0.6483	0.6151	0.7408	0.5665	0.5798	0.621	0.5463	0.6392	0.6549	0.6828	1.1461	1.0906	1.2623	1.1145	1.2596	0.9943	0.8848	1.281	1.0748	1.0965	1.0268	0.9686	1.2296	1.3315
glycylalanine	0.5102	0.7485	0.9616	0.8993	0.9574	1.3268	0.8692	0.2718	0.6793	0.4801	1.0084	1.5051	1.1466	0.513	1.1871	1.1984	1.4055	1.5566	1.2459	1.4111	1.3777	1.3354	1.2017	1.2235	0.9345	0.8541	0.6767	1.0183	0.2718	0.7466	2.3504
glycylaspartate	0.9588	1.2989	0.9563	1.5824	1.0913	0.9916	0.9558	0.7958	0.7154	0.84	0.7691	0.8659	1.033	0.783	0.9886	1.0297	1.0081	1.4142	1.2968	1.8336	1.4998	2.0371	1.5918	1.2946	0.8161	0.9718	0.828	0.723	0.7634	0.8782	1.3027
glycylglutamate	1.2583	1.5593	0.9897	1.7466	1.1098	0.9696	1.0103	0.8003	0.7042	1.0326	0.8555	1.0502	1.0456	0.864	1.1502	1.2371	1.2161	1.3316	1.1669	1.3444	1.3821	1.4307	1.2285	1.1754	0.895	0.7417	0.7674	0.7045	0.5509	0.7825	0.8941
glycylglycine	1.0587	1.4144	1.0724	1.4688	1.3858	1.2399	1.4521	0.8899	1.0664	1.072	0.8863	1.0065	1.0229	0.8918	1.1194	1.0193	0.9659	1.0582	1.2613	1.1117	1.0219	0.9592	0.8679	0.9361	0.9107	0.8666	0.9271	0.5596	0.5751	0.7843	1.1897
glycylserine	0.9795	1.2358	0.7015	1.2347	1.0541	1.0125	0.9094	0.754	0.8306	0.7812	1.0069	1.0558	1.0018	0.912	1.2441	1.1672	1.0659	1.0791	1.0556	1.2886	1.1894	1.4819	0.9014	1.0672	1.2335	0.9305	0.7479	0.5874	0.6679	0.8989	1.3111
guanidinoacetate	2.652	2.6645	2.3629	3.3607	2.1919	2.3948	3.9265	2.5128	2.2404	2.8445	0.8149	0.8587	1.1525	0.9407	0.9059	0.9309	1.0944	1.0893	1.0999	1.2133	0.9552	1.2942	1.011	0.9033	0.8883	0.8655	0.8377	0.751	0.844	0.8723	0.9438
guanine	7.2361	7.9121	7.8853	7.3283	7.7015	2.8898	3.7911	3.5074	4.1023	3.7833	1.0913	1.6478	1.7309	1.2299	1.6716	1.7718	1.7186	0.8711	0.8282	1.0567	0.5865	0.7775	0.726	0.8424	0.5473	0.7096	0.3539	0.4873	0.4195	0.5949	0.4771
guanosine	4.1412	5.0851	4.0479	5.2468	4.3761	4.6826	4.2678	4.2511	4.0817	3.7795	2.7947	3.3199	3.6204	3.401	3.1072	3.9002	3.8818	0.581	0.4999	1.0754	0.6848	0.9246	0.8752	0.6646	0.3433	0.3607	0.3116	0.3384	0.3365	0.4262	0.6509
guanosine 5'- diphosphate (GDP)	1.2737	1.5945	1.7415	2.229	1.4902	0.9497	1.0587	0.7767	0.7787	1.0978	1.7709	1.729	1.3081	2.0785	1.78	2.1626	2.2884	0.408	0.408	0.408	0.9575	0.9827	0.6195	0.9252	0.408	0.8635	0.989	1.011	0.7331	0.6831	1.2042
guanosine 5'- monophosphate (5'-GMP)	20.6322	25.3683	22.4636	30.3256	21.8467	25.8815	30.8617	23.6916	25.4009	27.3458	12.593	18.152	11.5599	13.2825	9.2668	19.8737	17.9807	0.6003	0.4287	1.0486	0.6289	0.7147	0.7143	0.5028	0.2781	0.4678	0.3248	0.276	0.3211	0.296	0.622
gulonate	10.5822	13.3699	10.4705	18.0853	11.2549	2.5026	3.2456	1.7953	2.3499	2.8887	1.1296	1.3756	1.1754	1.1599	1.2537	1.5482	1.4439	0.9568	0.7793	1.0694	1.1274	1.0074	1.1163	0.7981	0.5576	0.492	0.4499	0.4785	0.4299	0.6787	0.5772
heme	0.0834	0.2674	0.1727	0.4841	0.1052	0.067	0.067	0.067	0.067	0.067	0.693	0.067	0.067	0.067	0.0983	0.067	0.067	0.4551	0.8152	2.0827	1.0426	1.2558	0.9552	0.9123	1.3642	2.1182	0.9018	1.5911	1.2752	1.4065	1.7365
hexanoylcarnitine (C6)	0.529	0.3379	0.4891	0.8183	0.4004	0.8931	1.5517	1.1172	1.0724	1.0948	0.7279	1.6963	1.5294	0.944	0.6837	1.6635	1.7174	0.7208	2.0141	0.9301	1.0908	0.3379	1.023	1.0486	0.4927	0.6157	0.3379	1	0.9114	1.0284	0.9164
hippurate	0.3145	0.7133	0.2445	0.8457	0.302	0.5006	0.427	0.2445	0.2445	0.7365	1.1838	0.2445	0.459	0.2445	0.2445	0.4277	0.6297	1.3404	1.2798	3.3471	2.3137	2.904	2.0799	1.0104	0.9568	0.8972	1.2285	0.8616	0.7799	1.0165	1.1223
histidine	0.9193	1.1053	0.917	1.5165	0.8563	0.7747	0.699	0.7314	0.671	0.7223	1.3421	1.135	1.2707	1.2762	1.138	1.2972	1.3872	1.1094	0.9515	1.1207	1.1803	1.1889	1.0448	0.9851	0.8258	0.6812	0.6889	0.6147	0.6181	0.7634	0.8964
histidylglutamate	0.6618	0.8699	0.275	1.1568	1.0091	1.0002	0.9975	1.0287	1.1163	1.0563	0.968	1.1594	1.1897	0.9088	0.9615	1.173	1.4214	1.2871	1.2808	2.0804	1.3224	1.7178	1.6412	1.4103	0.7986	0.8353	0.8904	0.275	0.6403	0.7775	1.0195
histidylglycine	0.6252	0.9263	0.4905	0.6809	0.2453	0.6197	0.3335	0.2484	0.1797	0.3762	0.217	0.249	0.2793	0.1797	0.6989	0.1797	0.6334	1.0101	1.4252	1.5328	1.2773	2.7542	1.0601	1.2466	1.5083	1.0402	1.0599	0.4226	0.5938	1.3213	1.8684
homoarginine	2.8165	3.4055	2.2562	3.7851	3.8562	1.0021	1.0779	1.1092	0.8298	1.2515	0.9979	1.4679	1.3816	1.2749	1.5156	1.5647	1.6505	1.0073	0.7425	1.0079	0.9329	1.242	0.8641	0.9217	0.248	0.3043	0.2243	0.1687	0.2658	0.363	0.3655
homocitrulline	1.1516	2.1124	1.516	2.3419	1.5408	0.282	0.5592	0.2989	0.4752	0.3427	0.6028	1.0227	1.6983	1.0565	1.4711	0.6894	1.053	0.9734	1.0189	1.4517	1.36	1.1095	1.3263	0.6908	0.4006	0.715	0.8918	1.0509	0.6616	0.977	1.5586
homostachydrine	0.7294	1.1829	0.874	1.6869	1.7862	0.234	0.5637	0.2351	0.2507	0.2436	0.9336	1.0831	1.0968	0.4313	1.2836	1.4495	1.8126	3.2305	2.9939	5.1147	1.5001	3.2602	0.96	2.0455	1.2944	1.0276	0.4035	0.3174	0.5919	1.005	0.7452
hypotaurine	1.2593	1.37	1.0108	1.1698	1.245	0.6979	0.9892	0.6389	0.833	0.941	1.428	1.122	1.1958	0.9847	1.0765	1.0589	1.1789	1.172	0.859	1.3234	0.8795	1.1848	1.2899	1.0804	0.5202	0.5214	0.4237	0.5443	0.484	0.6302	0.6962
hypoxanthine	0.322	0.3789	0.3554	0.3488	0.3833	0.5033	0.4728	0.4133	0.4065	0.434	1.0026	1.0779	1.2229	0.9341	1.2361	1.0674	1.1083	1.1997	1.1523	1.3544	1.0771	1.3112	1.0369	1.0777	1.0002	1.1091	0.8298	0.7062	0.8522	0.9395	1.1082
imidazole lactate	0.8584	1.066	0.9115	1.6101	1.1292	1.097	1.2119	0.8448	1.3113	1.0339	1.7527	2.0034	2.1407	1.8493	2.885	3.2758	2.9966	1.0055	0.779	1.0691	0.8831	0.9529	0.7502	0.9945	0.4223	0.5535	0.3476	0.3044	0.2764	0.6036	0.527
imidazole propionate	0.606	0.9237	0.816	1.3055	2.2441	0.1355	0.1355	0.1355	0.1355	0.1355	1.1842	1.0532	0.7221	1.4541	0.9539	0.944	0.6631	1.828	2.0708	1.4837	1.8554	1.9683	2.0916	1.4382	0.3919	0.3257	0.6145	0.2592	0.3193	1.0461	0.3277
inosine	0.721	0.9155	0.7077	1.0014	0.7173	0.797	0.7732	0.6192	0.6021	0.6782	0.7237	0.6695	0.7042	0.7921	0.6565	0.838	0.8894	1.3081	1.162	1.54	1.4081	1.4416	1.5447	1.2028	1.2528	0.7864	1.0088	1.2112	0.8385	1.3406	1.2702
isobutyrylcarnitine (C4)	1.3529	1.6669	1.1169	0.9145	1.711	2.5269	3.1782	2.3032	2.0683	2.5974	1.5002	1.5535	1.3918	1.0136	0.9759	1.3848	1.0165	1	0.8078	1.1776	0.7912	0.9655	1.1765	0.8771	0.4193	0.4124	0.6161	0.4124	0.4743	0.4312	0.5395
isocitric lactone	0.5024	0.675	0.5024	0.8131	0.5871	0.7704	1	0.5437	0.5275	0.8707	1.3438	1.1672	0.7595	0.6539	1.1511	1.4315	1.1558	1.2422	1.085	0.9435	0.5024	0.8306	0.8137	0.7871	1.0444	1.1316	1.1516	1.1968	0.7831	1.2509	1.1208
isoleucine	0.8312	1.0381	0.9458	1.2278	0.9134	1.014	0.9894	0.8399	0.8056	0.964	0.8118	1	1.035	0.8989	1.1215	1.1987	1.2395	1.3821	1.3163	1.5861	1.4092	1.6203	1.3393	1.1792	0.9769	0.9611	0.9091	0.756	0.7443	0.9431	1.0559
isovalerylcarnitine (C5)	0.584	0.7608	0.5608	0.4093	0.3552	1.7571	2.1145	1.487	1.2379	1.5845	1.8772	1.6268	1.3239	1.4151	1.1808	1.4211	1.4149	1.1414	0.9357	1.4179	1.4153	0.995	1.3405	0.889	0.4912	0.4477	0.5635	0.3994	0.5127	0.3532	0.4222
kynurenine	0.6104	0.9977	0.7015	1.145	0.2158	0.3604	0.5367	0.445	0.2066	0.4144	1.9492	2.2681	2.9342	2.404	2.441	2.5804	2.2354	0.4623	0.4669	0.5489	0.5685	0.5612	0.5623	0.3633	0.9956	0.897	1.4802	0.6504	0.9537	1.1505	1.3818
lactate	0.5662	0.6828	0.5128	0.7382	0.5408	0.6166	0.6133	0.4661	0.452	0.6024	0.84	0.8304	0.9433	0.7779	1.0483	0.9324	0.9871	1.2622	1.22	1.3511	1.1807	1.4653	1.0739	0.9248	1.0973	1.1962	1.0228	1.0129	0.8929	1.1536	1.2495
lanthionine	0.4889	0.6261	0.1662	0.1662	0.9955	0.9014	1.5974	1.0111	1.1825	1.5969	0.9872	1.6686	1.9633	0.3135	1.2947	0.9105	1.3055	1.447	1.1541	2.1071	0.1662	0.8688	0.8025	1.3617	1.2007	0.699	0.599	0.1662	0.3664	1.1998	0.8231
leucine	0.9253	1.1166	0.9789	1.3322	0.8353	0.9634	0.9717	0.8086	0.7545	0.9581	0.7838	0.9427	0.9809	0.8847	1.0512	1.1306	1.1406	1.3469	1.2492	1.5003	1.4213	1.6408	1.3798	1.1272	1.0408	0.9707	0.9514	0.8005	0.7858	0.9544	1.1236
linoleoylcarnitine (C18:2)	0.0832	0.071	0.071	0.1221	0.071	0.6734	0.8625	0.5552	0.5787	0.6415	1.1175	1.1263	1.2951	1.1394	1.2637	1.5658	1.0828	1.0784	0.8625	1.2642	0.9853	1.0701	1.0244	0.7069	0.7397	0.7845	0.8989	0.6908	0.8916	0.6477	0.7775
lysine	0.9092	1.1084	0.8187	1.2696	0.981	0.9076	0.8997	0.8009	0.7579	0.8961	0.9943	1.1747	1.2169	1.0931	1.1591	1.263	1.2374	1.3256	1.1858	1.4653	1.4181	1.5655	1.2714	1.1895	0.943	0.925	0.8244	0.7284	0.7453	0.956	0.9951
malate	0.8507	1.0064	0.8045	1.0171	0.8501	0.9286	0.9647	0.8389	0.8247	1.0171	1.0243	1.1663	1.133	1.0355	1.1281	1.2102	1.1572	1.1906	1.1755	1.1696	1.2474	1.2567	1.1855	1.0491	0.9017	0.8769	0.8343	0.8808	0.7229	0.9363	0.9759
malonate	1.2361	1.3252	1.1955	1.7199	0.9403	1.1485	1.2334	1.1455	1.3382	1.0132	0.8867	1.3195	1.171	0.9846	1.189	1.1404	1.2232	0.9893	1.1027	1.0713	0.9048	1.118	0.8719	1.1055	0.6772	0.9356	0.7417	0.8405	0.848	0.945	0.7952
malonylcarnitine	0.3341	0.5466	0.4338	0.5497	0.2805	0.6678	0.6516	0.5626	0.5485	0.588	0.9628	1.1031	1.1159	1.2877	1.0726	1.1017	1.0663	1.2453	1.4103	1.8551	1.503	2.0367	1.6939	1.2175	0.7413	0.7072	0.7799	0.6615	0.7655	0.6301	0.7341
maltose	8.9288	13.9453	8.1442	11.2623	10.4006	2.033	1.7926	1.7457	1.5313	1.9932	0.5362	1.1145	0.8127	0.8495	1.1334	1.4875	1.3194	0.9454	0.7905	1.1969	1.1227	1.0296	1.0543	0.9888	0.6175	0.6969	0.6587	0.4629	0.5791	0.7787	0.7153
maltotetraose	29.5147	41.3506	28.5029	37.8546	37.9886	4.8147	3.8621	4.3328	5.3298	4.5738	0.6309	1.1156	0.5082	0.1147	1.1718	1.729	1.6778	0.3853	0.4838	0.1147	0.7288	0.9823	0.3992	0.8415	0.2755	0.2619	0.1147	0.1147	0.1205	0.1147	0.4527
maltotriose	13.9636	18.8979	12.9899	18.3205	18.8995	3.2117	2.3493	2.5989	3.1029	2.6248	0.7327	1.1751	0.8374	1.0959	1.1296	1.6724	1.4823	0.6247	0.515	1.5239	1.0113	0.8913	0.9352	0.9147	0.4848	0.4812	0.5588	0.3208	0.3986	0.5441	0.3831
mannitol/sorbitol	0.7784	0.9015	0.5988	1.0104	0.5218	0.6604	0.5974	0.4328	0.4828	0.6547	0.7418	0.9628	0.728	0.7411	0.8622	0.8257	0.7992	1.3183	1.1537	1.3057	1.3302	1.4856	1.0855	0.8466	1.4337	1.0157	1.0331	1.162	1.0364	1.2369	1.2498
mannose	0.3368	0.332	0.4081	0.4248	0.332	0.6632	0.5261	0.6127	0.6809	0.5842	0.8562	1.3566	1.5424	1.1312	2.1289	1.671	1.9298	1.553	1.4108	2.2286	1.7016	1.7561	1.4092	1.2156	0.7648	0.9381	0.654	0.5307	0.5276	0.8871	0.9875
mannose-6-phosphate	0.1492	0.2217	0.1675	0.1294	0.2402	0.2285	0.291	0.2787	0.2981	0.1949	0.8626	1.3068	1.2913	0.7008	1.559	1.4609	1.8314	1.6121	1.1541	2.3839	1.4383	1.6299	1.3345	1.1888	0.9969	1.1873	0.5082	0.4086	0.537	1.0448	0.8452
methionine	0.5414	0.7341	0.5584	0.7432	0.6219	0.7219	0.711	0.6416	0.6596	0.6949	0.8213	0.8609	0.9176	0.8823	1.0089	1.0759	1.0956	1.2858	1.1717	1.562	1.4264	1.601	1.4181	1.1651	1.0285	0.9713	0.889	0.8021	0.7834	1.0507	1.2059
methionine sulfoxide	0.7462	1.0259	0.6761	0.9153	0.7611	0.7611	0.8892	0.7847	0.696	0.7878	0.4067	1.2602	1.1107	1.1694	1.2	1.4801	1.4395	1.3083	1.2437	1.3807	1.353	1.3241	1.2264	1.0281	0.9342	0.7688	0.8136	0.7553	0.6591	0.8711	0.7652
methyl glucopyranoside (alpha + beta)	1.4923	1.6003	1.4044	1.4783	1.6652	0.7529	0.5606	0.6603	0.6877	0.6247	0.2285	0.2909	0.6003	0.605	0.7847	0.7212	0.6183	1.6074	1.6607	1.408	1.7702	1.3533	2.4003	1.7372	1.0609	0.6686	0.7695	1.1111	1.0238	0.9762	1.2561
methylmalonate (MMA)	1.3819	1.6175	1.4006	2.0713	1.3833	0.9989	0.9797	0.8647	0.7178	0.8982	0.8536	0.9837	1.049	0.8801	1.2698	1.1048	1.0275	1.2515	1.1625	1.3384	1.0866	1.2137	1.0078	1.1333	0.7059	1.0183	0.8335	0.8651	0.7675	0.8551	0.9811
methylphosphate	0.3811	0.4752	0.3227	0.54	0.3648	0.3927	0.4956	0.3591	0.2419	0.4372	0.5481	0.7588	0.7467	0.6591	1.086	0.9434	0.9787	1.2901	1.1539	1.6102	1.3186	1.5286	1.1221	0.9917	1.1687	1.5953	1.0885	0.9928	1.1987	1.4167	2.0388
methylsuccinate	0.5242	0.6253	0.4242	0.8551	0.3513	0.8378	1.0129	0.7786	0.6142	0.9389	0.9871	1.1751	1.2239	1.053	1.2036	1.2819	1.1115	3.199	2.2335	2.7734	2.0454	2.8007	2.2286	1.552	1.0866	0.6019	0.6396	0.755	0.7173	0.8789	0.7077
myo-inositol	0.3582	0.465	0.3475	0.5199	0.3554	0.427	0.3958	0.4181	0.3428	0.3968	0.5484	0.6453	0.7404	0.5571	0.6517	0.6839	0.6805	1.1668	1.0924	1.4101	1.2547	1.3805	1.1735	1.1112	1.0776	1.1925	1.0497	1.0418	0.9592	1.0961	1.3393
myristoylcarnitine (C14)	0.0498	0.0675	0.0426	0.0696	0.0422	0.2421	0.2648	0.1849	0.2169	0.2359	0.8367	1.0744	1.2059	0.9431	1.0124	1.2352	0.9272	1.3378	1.3335	1.8299	1.2128	1.4556	1.2004	0.8349	0.9141	0.8672	0.9163	0.9578	0.7963	0.7654	0.9842
N-acetyl-1-methylhistidine	1.7943	1.6003	0.3795	0.672	0.862	0.3643	0.2581	0.2467	0.2563	0.4033	1.0871	1.9261	1.8004	1.6968	1.4662	1.883	2.3493	0.2461	0.2783	1.0531	1.1122	1.3113	0.5727	0.6463	1.1151	0.4591	0.2266	0.3562	0.2215	0.7233	0.4383
N-acetyl-aspartyl-glutamate (NAAG)	0.898	0.9257	0.7942	1.0163	0.9136	1.1977	1.1632	1.047	1.078	1.1684	1.0915	1.2748	1.1663	1.1299	1.3663	1.2553	1.3535	1.0675	0.9351	1.0503	1.0049	0.9951	0.9894	0.9121	0.7646	0.7767	0.7291	0.6963	0.7313	0.8029	0.9067
N-acetyl-glucosamine 1-phosphate	2.1921	2.4804	2.2669	2.5934	2.0069	1.5598	1.3841	1.1157	1.1812	1.3131	0.4871	0.8543	0.9552	0.7017	1.1658	0.9765	1.1186	0.993	1.1075	1.2614	1.1974	1.4966	1.391	0.7529	0.6484	0.9373	0.6573	0.7052	0.6426	0.7343	1.077
N-acetylalanine	0.405	0.5326	0.3778	0.5358	0.4134	0.4717	0.4961	0.3683	0.374	0.4687	0.6432	0.8026	1.0016	0.7511	0.9491	0.9011	1.0494	1.4726	1.3532	1.5617	1.3752	1.8483	1.1404	1.1646	1.4386	1.0828	1.0251	0.787	0.7934	1.153	1.3543
N-acetylarginine	0.104	0.1478	0.1189	0.1802	0.1126	0.2266	0.2305	0.2295	0.1909	0.2234	0.6711	0.7992	0.9954	0.8379	0.8107	0.9026	1.0046	1.6797	1.4909	2.2848	1.5709	1.9968	1.9077	1.5076	1.0816	1.1766	0.8891	0.8745	0.889	1.5061	1.3588
N-acetylasparagine	0.8813	0.8974	0.5999	0.8784	0.6486	0.574	0.5609	0.4642	0.6307	0.7887	0.5284	0.9431	1.1019	1.0553	1.1551	1.0787	1.2067	1.0859	1.0398	1.7325	1.4134	1.3658	1.2531	1.4018	1.4415	0.9384	0.6959	0.6811	0.5381	0.9652	0.6901
N-acetylaspartate (NAA)	0.1434	0.164	0.1332	0.1764	0.1198	0.2212	0.2191	0.208	0.1905	0.2122	0.7502	0.8481	0.8603	0.8247	0.8203	0.844	0.8838	1.1718	1.0814	1.2361	1.1777	1.2098	1.1627	1.0817	1.2345	1.0375	1.0856	1.1018	0.9891	1.1783	1.2119
N-acetylglucosamine 6-phosphate	0.435	0.6435	0.4284	0.6763	0.5448	0.8039	0.7239	0.6122	0.659	0.8037	0.5626	0.6145	0.9812	0.7819	1.0031	0.797	0.9969	1.6435	2.0328	2.2366	2.1999	2.3618	2.0634	1.5364	1.2398	1.5273	1.2538	0.8863	0.9866	1.218	1.692
N-acetylglucosamine/N-acetylgalactosamine	0.4601	0.474	0.4454	0.5133	0.5688	0.7795	0.8889	0.664	0.79	0.704	1.1453	1.1818	1.2008	1.0051	1.4904	1.2538	1.3211	1.1708	1.1232	1.2526	1.0631	1.043	1.0689	0.9949	0.8558	0.8504	0.71	0.7085	0.6102	0.8586	0.6661
N-acetylglucosaminylasparagine	0.9829	1.2062	0.9499	1.4968	1.0171	0.8394	0.8756	0.6701	0.6625	0.7213	0.6432	0.7274	0.8873	0.8241	0.8326	0.8652	0.7959	1.0503	1.1951	1.3855	1.318	1.1857	1.1609	1.055	1.074	1.0291	0.9484	0.9124	0.8251	1.1376	1.2193
N-acetylglutamate	0.1378	0.1448	0.1557	0.1196	0.1976	0.2441	0.2394	0.2269	0.2662	0.1811	0.76	0.8335	0.9925	0.887	0.9381	0.8941	1.0075	1.2951	1.2486	1.5204	1.2424	1.3025	1.3703	1.1201	1.1648	1.0203	0.9775	1.0439	0.953	0.9194	1.0303
N-acetylglutamine	0.492	0.51	0.2033	0.3118	0.3596	0.4415	0.221	0.2008	0.3815	0.4774	0.7925	0.936	1.1504	0.958	1.0497	1.0024	1.1781	1.1216	0.9976	2.1863	1.5295	1.8365	1.2083	1.6385	2.4783	1.5917	0.8941	0.8216	0.8506	1.6121	1.1433
N-acetylhistidine	1.7436	2.0455	0.8718	1.5671	1.1013	0.7006	0.3693	0.4477	0.8145	0.9743	0.9485	1.3182	1.658	1.8126	1.6319	1.4458	1.6909	0.4222	0.271	1.0586	0.714	0.8986	0.9903	1.0531	0.5415	0.4502	0.3019	0.271	0.271	0.271	0.6012
N-acetylmethionine	0.2954	0.3257	0.2427	0.3281	0.2817	0.4084	0.3626	0.3193	0.3434	0.3266	0.9938	0.8694	0.7832	0.7165	0.8051	0.8711	0.8761	1.2143	0.979	1.2881	1.2244	1.3003	1.2331	1.2186	1.2852	1.1564	1.23	1.1404	0.9719	1.2736	1.3626
N-acetylmethionine sulfoxide	0.3818	0.5096	0.2688	0.4702	0.4448	0.5198	0.5769	0.5047	0.4941	0.4178	0.4931	1.1685	1.1653	1.239	1.2184	1.2577	1.0172	0.9834	0.9051	1.1389	1.1528	0.9279	1.2649	0.9418	0.8583	1.007	1.2606	1.0635	0.8564	0.902	0.993
N-acetylneuraminate	0.2392	0.2999	0.2131	0.2573	0.2152	0.498	0.4187	0.3941	0.3785	0.4484	1.0022	1.1562	1.0871	1.0739	1.2363	1.2325	1.1693	1.3251	1.3469	1.4031	1.4127	1.4605	1.324	1.1575	0.9302	0.9029	0.8804	0.8655	0.8123	0.8618	1.0541
N-acetylphenylalanine	1.543	1.0934	0.5365	0.5927	0.8803	0.8503	0.55	0.3922	0.7456	0.8381	0.9974	1.335	1.2895	1.2258	1.1788	1.5086	1.6727	0.8149	0.6574	1.5403	1.1484	1.3126	0.9294	1	1.1126	0.6279	0.4772	0.3347	0.2882	0.1723	0.5195
N-acetylputrescine	5.5213	7.2721	5.4018	8.2326	7.2551	4.9999	4.4421	3.4601	3.6689	4.9665	1.1866	1.1308	1.3883	1.2475	0.9971	1.3202	1.2667	0.867	0.994	1.1748	0.8952	1.0292	0.9316	0.855	0.4516	0.3811	0.304	0.3439	0.2464	0.3697	0.321
N-acetylserine	0.9665	1.0871	0.9255	0.9803	1.0045	0.9062	0.7702	0.7442	0.8464	0.8432	0.7026	1.0545	1.1994	0.9955	1.1338	1.017	1.2534	1.2556	1.1651	1.4043	1.288	1.181	1.3179	1.0921	0.9415	0.8155	0.8757	0.8424	0.7849	0.8518	0.843
N-acetyltaurine	5.4339	5.271	4.956	7.5819	5.4074	2.83	3.3723	2.9022	2.9248	3.3341	1.0052	1.2228	1.2936	1.4926	1.1675	1.6252	1.4152	0.9314	0.7601	1.0189	0.8728	0.8544	1.0034	0.8138	0.4695	0.2813	0.3712	0.2882	0.2313	0.4282	0.334
N-acetylthreonine	1.0436	1.1779	0.8898	1.2482	1.0682	0.9509	0.8713	0.873	0.8811	1.0422	0.7371	1.0229	1.1552	1.1438	1.0027	1.1027	1.1213	1.0886	0.8883	1.6568	1.0062	1.2895	1.2283	0.9529	1.12	0.6145	0.7429	0.5366	0.5651	0.9617	0.902
N-acetyltyrosine	1.1032	0.7587	0.2654	0.3885	0.6725	1.0736	0.4897	0.5745	1.0881	1.4271	0.9746	1.1266	1.116	1.0005	1.1764	1.8352	1.8561	0.4969	0.275	1.0168	1.119	1.0981	0.5515	0.9431	1.0887	0.5227	0.3232	0.3479	0.3249	0.9291	0.3547
N-arachidonoyltaurine	0.1596	0.1807	0.1549	0.3984	0.1549	0.1549	0.2061	0.1549	0.3477	0.188	0.6088	0.9021	1.1412	0.8344	1.2668	2.0717	0.9015	1.6188	0.9573	2.6624	2.9364	2.9103	1.2635	1.0709	1.7984	1.534	0.8132	0.2441	0.4113	0.7707	0.4793
N-delta-acetylornithine	0.6714	1.1826	0.9597	1.2694	1.0945	0.0604	0.1103	0.0565	0.0814	0.058	0.1556	0.2359	0.3135	0.2422	0.2856	0.2309	0.208	1.1308	1.3807	1.6352	2.0554	1.4077	2.4119	1.0109	0.6933	0.9451	1.1792	1.2061	0.7837	1.1636	1.7122
N-formylmethionine	0.999	1.0427	0.7881	1.1372	0.7355	0.7897	0.7321	0.8391	0.6476	0.7618	0.7732	0.9628	1.0465	1.0922	0.9459	0.9791	1.2807	1.5102	1.4176	1.8522	1.6454	1.79	1.7512	1.3635	0.9059	0.6977	0.9713	0.8569	0.823	0.8936	1.0185
N-formylphenylalanine	2.1096	2.5705	2.3668	2.7047	1.2886	1.3294	1.5486	1.4092	0.8181	1.3821	0.488	0.8532	1.2065	0.7589	0.9433	1.2439	1.1888	1.3729	0.9095	1.3305	0.89	1.0937	1.2406	0.8534	0.6278	0.488	0.6697	0.8598	0.5849	0.488	0.6676
N-methylalanine	2.3342	3.8239	2.5913	2.4658	1.6047	1.0629	2.0707	1.394	1.5514	1.6637	0.3393	1.6656	0.9238	0.4516	0.6678	1.8037	1.5292	0.4253	0.1129	0.9312	0.6429	0.6996	1.1496	0.463	1.4194	0.6719	0.7639	1	0.1129	0.9402	0.2717
N-monomethylarginine	0.37	0.5092	0.2564	0.8037	0.5399	0.2969	0.4329	0.1881	0.2706	0.2496	0.4306	0.4724	0.6246	0.5183	0.6897	0.5404	0.6302	1.2357	1.489	1.776	1.4338	1.3043	1.3992	1.1268	1.6327	1.4258	1.0448	1.0032	0.8957	1.3541	1.6941
N-palmitoylserine	0.2678	0.4764	0.2608	0.4262	0.48	0.3135	0.3427	0.2608	0.553	0.2608	0.2608	0.9785	0.2608	0.2608	0.5609	0.2608	0.6102	1.9534	0.2608	0.9455	1.0215	3.1871	0.2608	0.7446	6.8132	3.0108	2.1825	0.9432	1.2782	3.0125	1.6867
N-stearoylserine	0.2004	0.4766	0.3005	0.6133	0.3248	0.6263	0.6154	0.2045	0.4261	0.6869	0.673	1.2052	1.4987	1.7832	1.6201	1.0736	1.7608	2.0751	1.0383	1.1378	1.0129	1.1115	0.9173	0.7316	1.9717	0.6412	0.9871	0.3141	0.508	1.0481	0.4832
N-trimethyl 5-aminovalerate	0.6631	0.7151	0.5679	0.8573	0.4649	1.032	1.249	0.9705	1.0561	1.0703	0.6599	0.7949	0.7789	0.6443	0.8854	0.9948	1.0052	0.7817	0.9229	1.21	1.0893	1.0813	0.8474	0.7525	2.625	2.4717	4.4495	3.3522	2.0416	2.3926	6.08
N1-methyladenosine	0.9303	1.4816	0.9801	1.4712	1.1751	0.9776	0.9743	0.6698	0.8695	1.0099	0.7464	1.0252	1.0454	0.8871	1.1086	1.0509	1.2923	1.0981	1.258	1.5017	1.0717	1.378	1.37	1.1798	0.8246	0.8008	0.8532	0.8043	0.5145	0.8113	1.061
N2,N2-dimethylguanosine	2.7108	3.2968	3.18	4.1927	4.0412	1.4662	1.5782	1.1705	1.406	1.4699	0.8421	1.0808	0.9213	1.0209	0.9581	1.2295	1.3694	0.761	1.0139	1.4347	1.1305	1.2722	1.0232	0.8237	0.5766	0.5715	0.4195	0.5702	0.3836	0.5889	0.5907
N6,N6,N6-trimethyllysine	1.1947	1.8119	1.2367	2.2805	1.2435	1.082	0.9787	0.8823	0.7598	0.9378	0.6291	0.9435	1.0422	0.859	1.0677	1.4683	1.1905	0.925	0.8531	1.2376	1.0535	1.243	1.0213	0.8296	1.1931	0.7124	0.632	0.5427	0.9536	1.309	1.419
N6-carbamoylthreonyladenosine	3.6299	3.8731	3.6566	4.7941	3.2072	1.5508	1.5447	1.1299	1.3288	1.6707	0.8236	0.8681	0.7056	0.9045	0.8161	1.3013	0.8928	0.9343	0.9614	1.2068	1.2234	1.419	1.2603	1.0106	1.0399	0.7551	0.8965	0.8953	0.6066	0.9272	1.0483
N6-succinyladenosine	2.1552	2.1451	1.8468	2.5197	1.9121	1.8989	1.9401	1.5469	1.8148	1.8779	1.0892	0.9388	0.9693	1.2117	1.0546	1.0004	1.0633	1.0047	1.0141	1.205	1.1642	1.391	1.1401	0.7799	0.6616	0.4191	0.7124	0.7415	0.4994	0.8398	0.8662
nicotinamide	0.463	0.5841	0.4947	0.6074	0.5802	0.6141	0.7193	0.5521	0.6386	0.6218	0.8588	0.9292	1.0249	0.8812	0.9995	1.0005	1.1064	1.3055	1.2101	1.3962	1.1628	1.245	1.1534	1.2149	1.1239	1.1017	0.9162	0.8696	0.8342	1.0862	1.0223
nicotinamide adenine dinucleotide (NAD+)	0.9293	0.8523	1.0771	0.8992	1.1155	0.6964	0.498	0.5994	0.5981	0.5497	0.8845	0.7412	0.8268	0.7519	0.9096	0.8536	0.8641	0.9815	1.1272	1.527	1.1921	1.2263	1.1448	1.0205	1.065	0.9435	1.0009	1.0584	0.9991	1.0855	1.2566
nicotinamide riboside	1.9965	1.7606	2.0032	2.0208	2.3729	0.9181	0.3852	0.592	0.4567	0.3852	1.2785	1.4371	0.9795	0.7249	1.5106	1.2628	0.93	1.4975	1.3441	1.3404	1.2814	0.3852	1	1.261	0.9143	1.6168	0.6428	0.8094	0.3852	1.1049	0.7797
O-sulfo-L-tyrosine	0.9265	0.946	0.8628	1.1486	0.9274	0.6276	0.7328	0.5298	0.4702	0.6545	0.8865	0.8702	0.7497	0.8123	0.9407	1.1796	1.0991	1.4302	1.2153	1.6491	1.3644	1.371	1.445	1.0929	1.0625	0.9235	1.0819	0.9482	0.7836	1.1194	1.3671
o-Tyrosine	1.4883	2.3313	1.6877	2.0035	1.4418	1.2741	0.9922	1	1.1687	1.436	0.5018	0.7177	0.8546	0.8654	0.8635	0.7991	1.0155	1.2018	1.3235	1.8057	1.2497	1.3998	1.7964	1	0.5018	0.8802	0.9047	0.6619	0.5018	0.6534	1.2914
oleoyl ethanolamide	0.0344	0.1567	0.0344	0.1505	0.0878	0.1128	0.0935	0.0344	0.059	0.0996	0.2298	0.3048	0.3752	0.2831	0.413	0.4409	0.3835	1.4186	1.278	1.2117	1.0148	1.5485	1.045	0.9852	4.2906	1.1907	1.755	0.475	0.774	1.1186	1.0261
oleoylcarnitine (C18:1)	0.0758	0.0945	0.0641	0.1057	0.0696	0.2097	0.2346	0.1799	0.1743	0.2044	0.5307	0.4743	0.6455	0.4882	0.4309	0.5186	0.4296	1.2243	1.2517	1.3792	1.1233	1.3921	1.1348	0.8646	1.1876	1.1234	1.1537	1.0625	1.1055	1.0053	1.207
ophthalmate	3.6728	4.221	3.5983	4.4921	4.2671	1.0154	1.0215	1.1826	0.9846	1.7305	1.3863	1.2053	1.7855	1.7003	1.8557	1.7737	1.6811	1.0176	0.7002	0.717	0.841	0.8257	0.8842	0.5171	0.3891	0.6199	0.5452	0.6031	0.6166	0.5379	0.765
ornithine	0.8876	1.2562	0.9981	1.4452	0.8057	1.351	1.2105	1.0019	0.9546	1.2528	0.9121	1.0166	0.9902	0.9549	1.0934	1.0896	1.0558	1.3713	1.3847	1.9677	1.4182	1.8054	1.4562	1.1336	0.881	0.8158	0.7238	0.7217	0.6545	0.8527	0.8719
orotate	1.8773	2.329	1.9103	3.1264	1.8249	2.1693	2.2518	1.6247	1.7665	2.168	1.063	0.9722	1.0276	0.9973	0.9907	1.2974	1.0994	1.2706	0.9333	1.069	0.9352	1.0027	1.384	1.1445	0.6125	0.6786	0.6288	0.7515	0.5166	0.7569	0.8583
orotidine	2.8521	3.3997	2.6684	4.2858	2.9395	2.2488	3.0254	2.064	1.9424	2.7194	1.2458	1.6181	1.4139	1.4871	1.5963	1.8472	1.7867	0.9973	0.7774	1.0474	0.884	0.9471	0.8068	0.539	0.3418	0.2119	0.2982	0.306	0.2361	0.416	0.376
oxalate (ethanedioate)	1.2438	1.3846	1.079	1.4774	1.0339	0.9074	1.103	1.0099	0.8437	1.2856	0.372	0.8943	1.1345	0.9961	0.9883	1.0973	1.2676	1.3651	1.3076	1.2607	1.2554	1.328	1.119	1.0887	0.8605	0.7244	0.7614	0.8575	0.676	0.9008	0.7432
palmitoleoylcarnitine (C16:1)	0.0343	0.0501	0.035	0.0532	0.0326	0.1571	0.1722	0.1248	0.1226	0.1534	0.5549	0.629	0.6849	0.5814	0.579	0.7126	0.5321	1.227	1.2277	1.6917	1.05	1.2756	1.3048	0.6801	1.0659	1.1754	1.2494	1.1987	1.0848	0.9582	1.2889
palmitoyl ethanolamide	0.1918	0.3038	0.2201	0.3584	0.248	0.305	0.296	0.1566	0.2502	0.2802	0.2425	0.3845	0.4058	0.3758	0.465	0.4151	0.4089	1.5112	1.2817	1.2342	1.0689	1.6615	0.9888	1.0128	7.1175	1.9608	2.9063	0.7968	1.2312	1.8493	1.7965
palmitoylcarnitine (C16)	0.0989	0.1331	0.1034	0.142	0.1069	0.3919	0.4293	0.2804	0.3196	0.3769	0.6791	0.655	0.8272	0.7219	0.6692	0.7163	0.6563	1.1965	1.2172	1.2931	1.0669	1.3428	1.0136	0.8366	1.3962	1.3375	1.3945	1.3473	1.3046	1.1144	1.449
pantetheine	0.0867	0.19	0.1229	0.1552	0.1924	0.3464	0.2312	0.2419	0.2581	0.1929	1.2262	0.9723	0.9923	0.6602	1.2289	1.1135	1.2362	1.4542	1.318	1.8183	1.3584	1.8895	1.1635	0.9952	1.0077	1.2194	0.8641	0.6621	0.7443	1.0048	1.6236
pantothenate	2.4734	2.9989	2.6078	3.2353	2.92	1.5414	1.698	1.4301	1.3687	1.7132	0.9357	1.2407	1.318	1.0052	1.4026	1.5124	1.3844	0.9629	0.82	0.959	0.9948	1.1545	0.8976	0.7802	0.887	0.8963	0.8398	0.7396	0.77	0.9119	1.1328
phenylalanine	0.9409	1.0944	0.9133	1.1371	0.8028	0.829	0.8394	0.6864	0.6904	0.7361	0.8856	0.9479	1.1057	0.9225	0.9825	1.0846	1.1831	1.3223	1.1691	1.4123	1.2889	1.5649	1.3093	1.1444	1.0904	0.9967	0.9739	0.7845	0.8431	1.0147	1.2155
phosphate	0.7307	0.7854	0.7347	0.7833	0.7779	0.8214	0.7617	0.7783	0.7893	0.7889	0.9337	0.9503	0.9867	0.8898	0.9665	1.0045	0.9999	1.0489	1.0488	1.1796	1.0895	1.0371	1.0733	1.0001	1.02	1.0057	0.9571	0.9598	0.9549	1.0407	1.0788
phosphoenolpyruvate (PEP)	1.919	2.6925	2.533	2.5584	2.8953	1.3432	1.1935	1.6135	1.1681	1.6658	1.0371	1.0958	0.9876	1.0214	1.1322	1.0765	1.0577	0.9643	1.0264	0.9438	1.0986	0.9233	1.1972	1.0911	0.8612	0.9359	0.9498	0.8932	0.8859	0.9622	0.8404
phosphoethanolamine	1.2465	1.5643	1.2487	1.7066	1.2935	1.5095	1.4924	1.3743	1.2569	1.4924	1.0892	1.3616	1.2278	1.1391	1.3057	1.4185	1.3373	0.9101	0.8063	1.0204	1.0088	0.9912	0.917	0.8567	0.7639	0.6711	0.678	0.723	0.6138	0.746	0.7733
phosphopantetheine	0.0603	0.079	0.0603	0.1299	0.1252	0.2036	0.2073	0.1455	0.1244	0.1436	0.9876	0.7394	0.6154	0.6377	0.8388	0.9016	0.837	1.4681	1.6055	1.8014	1.74	2.0826	1.4631	1.4873	1.1678	1.295	1	1.0443	0.7926	1.4693	1.8357
pimelate (C7-DC)	1.0178	1.2616	0.8355	2.5347	0.7254	0.5012	0.5012	0.7629	0.5012	0.5647	0.5012	0.706	1.0955	0.8144	0.7636	0.8406	0.7843	1.1546	1.1938	1.0937	0.8837	1.4944	0.5152	0.5012	1.2734	1.0243	1.3562	1.533	1.2325	1.1455	1.3265
pipecolate	6.013	10.9715	8.2574	10.6517	11.709	1.3645	2.3275	1.4209	1.684	1.7134	1.038	1.5703	1.4732	1.1933	1.7744	1.8519	2.2366	0.8945	0.8353	1.0667	0.8639	1.1293	0.856	0.6833	0.7832	0.5697	0.63	0.6284	0.6654	0.8403	0.7282
proline	1.2464	1.3835	1.3243	1.6699	1.3406	1.1772	1.2153	0.9216	1.0714	1.1421	0.8812	1.0668	1.1406	0.9318	1.1238	1.0673	1.0583	1.2186	1.0575	1.2661	1.1297	1.2466	1.0091	1.0225	0.8757	0.8268	0.7905	0.6799	0.7341	0.8679	0.9385
prolylalanine	0.6577	0.9138	0.4556	0.9564	0.6176	1.1858	1.1959	0.9879	0.8661	0.9396	1.0357	1.3843	1.1579	1.2238	1.102	1.4344	1.4133	1.1431	1.0435	1.5902	1.3572	1.8137	1.1809	1.1024	0.7317	0.7088	0.6747	0.4892	0.588	0.8184	1.0136
prolylglutamate	0.7113	0.9661	0.7837	1.1137	0.8847	1.0211	0.9998	0.8659	0.889	0.9583	0.7846	0.9662	1.1657	1.0262	1.1832	1.1471	1.422	1.3716	1.3866	1.8824	1.3623	1.7606	1.4029	1.2566	0.8831	0.8185	0.8074	0.6614	0.7587	0.8239	1.0321
prolylglycine	0.4409	0.6645	0.3977	0.8608	0.501	0.9902	1.0379	0.7485	0.6973	1.0667	0.9825	1.4011	1.3541	1.0463	1.105	1.1558	1.7375	1.3066	1.2413	1.7087	1.1543	2.2327	1.3433	1.281	0.704	0.7458	0.5965	0.5646	0.5464	0.758	1.0027
prolylproline	0.7028	1.0455	0.6083	1.0186	0.7982	0.9602	0.8436	0.6607	0.6483	0.679	1.0211	1.3583	1.3119	1.1608	1.6529	1.7422	1.2775	1.2199	1.1554	1.729	1.7288	1.5791	1.3274	0.9814	0.7758	0.9711	0.7094	0.5859	0.4819	0.6794	0.8596
propionylcarnitine (C3)	0.4886	1.0748	0.5409	0.6593	0.4908	0.9934	1.2655	1.1449	1.3828	1.6229	0.71	1.1763	1.1913	0.9766	1.143	0.9684	0.9067	1.1741	1.1121	1.4043	1.4459	1.12	1.3175	0.8707	0.7704	0.9159	0.8496	1.4829	0.5871	0.7167	0.6106
prostaglandin F2alpha	0.3856	0.2978	0.2754	0.3055	0.3208	0.51	0.6299	0.4366	0.4544	0.5209	0.9465	1.0808	1.1161	1.0659	1.2203	1.329	1.0215	1.3272	1.1359	1.5754	1.1949	1.3324	1.4205	1.0588	1.025	0.6262	0.9072	0.9785	0.5895	0.8365	0.7546
pseudouridine	1.8515	2.5376	2.1202	3.0483	2.1941	1.1295	1.425	1.0451	1.1008	1.1129	1.0714	1.1822	1.1896	0.8893	1.0862	1.1537	1.2405	1.0342	0.8575	1.1446	0.978	1.0546	0.9242	0.8416	0.7423	0.5455	0.5653	0.6198	0.4421	0.7454	0.7288
putrescine	6.4937	7.3503	6.4708	8.7784	9.1081	4.866	5.42	4.0096	4.5194	5.0872	1.1679	0.9954	1.2516	1.1539	1.0934	1.2113	1.1299	0.8713	1.0695	1.0514	0.9764	1.1416	0.946	0.9505	0.5871	0.4897	0.3433	0.4669	0.3152	0.4814	0.4905
pyridoxal	0.2814	0.4062	0.2783	0.3839	0.333	0.5595	0.4998	0.4058	0.4565	0.4256	0.8356	0.8857	0.9071	0.7464	1.0186	0.9461	1.0224	1.2918	1.3083	1.6361	1.3679	1.507	1.2531	1.1527	1.096	0.9546	1.004	0.8839	0.8278	0.996	1.5375
pyridoxamine	0.2183	0.5011	0.298	0.3473	0.3101	0.5819	0.4413	0.5135	0.4461	0.5453	0.9863	0.7077	0.8558	0.6442	0.9712	0.892	0.8222	1.2034	1.2004	1.4202	1.2627	1.3343	0.8182	1.0412	1.1046	1.2273	1.1167	1.0578	1.0796	0.9869	1.4295
pyridoxamine phosphate	0.0633	0.0603	0.0587	0.1132	0.0834	0.1662	0.1523	0.0587	0.1164	0.1006	0.6093	0.5761	0.5274	0.414	0.598	0.5389	0.6407	1.2011	1.2766	1.4311	1.1076	1.2098	0.988	1.1438	1.3183	1.2533	1.1069	0.9464	1	1.3735	1.3151
pyroglutamine	0.0444	0.0425	0.0378	0.0497	0.0376	0.0766	0.0611	0.0589	0.0643	0.0616	0.437	0.3874	0.3949	0.4048	0.3837	0.3955	0.4163	1.0873	1.0648	1.1338	1.0283	1.1646	1.0701	0.9992	1.1552	1.0613	1.0197	0.9756	1.0008	1.0569	1.2196
pyruvate	0.2322	0.2437	0.2139	0.3662	0.2045	0.3069	0.3194	0.235	0.2616	0.3165	0.755	1.0946	1.2042	1.064	1.3776	1.2551	1.2931	1.5111	1.2537	1.5139	1.5347	1.7046	1.4138	1.1964	0.8586	0.8777	0.8217	0.8604	0.73	0.9528	0.8953
ribitol	0.9523	1.073	0.8959	1.423	0.8565	1.002	0.9428	0.7785	0.4692	0.9089	0.6326	0.7709	0.9255	0.9564	1.0712	1.0278	1.2491	1.5951	1.4227	1.311	1.296	1.5737	1.4985	1.0886	4.0082	0.7467	0.767	0.9354	0.5174	3.7693	0.9116
riboflavin (Vitamin B2)	0.8746	0.9109	0.8518	0.9254	0.8153	0.958	0.87	0.8251	0.7685	0.9126	0.7383	0.7804	0.8461	0.9256	0.7912	0.9784	0.8356	1.276	1.2768	1.786	1.2662	1.7189	1.3966	0.965	1.3703	1.0216	1.2662	1.085	0.9023	1.3049	1.1133
ribonate	1.3611	1.8609	1.5246	2.5642	1.4823	0.7349	0.9035	0.7358	0.6476	0.8762	0.6902	0.792	0.9233	0.7849	1.0062	0.9938	1.1763	1.5167	1.1532	1.529	1.3389	1.4212	1.2556	1.1494	1.4166	0.9192	0.7557	0.7625	0.562	1.38	0.9552
ribose	0.9238	1.3328	0.9051	1.4414	1.0378	1.296	1.2222	0.9163	0.9265	1.0546	0.771	0.7869	1.0463	0.8962	1.0076	0.998	1.1124	1.6728	1.6128	1.6939	1.7138	1.6078	1.772	1.3601	0.8662	0.7705	0.8269	0.989	0.7818	1.002	0.9642
ribose 1-phosphate	1.4774	1.2605	1.1622	1.6245	1.4085	1.1045	1.3508	0.8144	1.0091	1.0133	0.3763	0.2785	0.2338	0.2157	0.2127	0.2363	0.3886	1.3287	0.8597	1.0926	1.1816	0.7974	1.2764	0.9909	1.1402	0.8138	0.8608	1.5319	0.989	1.5654	0.9185
ribulonate/xylulonate	0.836	1.005	0.7459	1.3457	0.7111	0.7431	0.9507	0.7512	0.7104	0.8632	0.8514	0.8515	1.1783	0.9244	1.3423	1.2008	1.4717	1.6019	1.3487	1.669	1.4269	1.7863	1.4469	1.155	0.7842	0.8436	0.7385	0.726	0.608	0.9333	0.9805
ribulose 5-phosphate	0.1206	0.3099	0.1206	0.1801	0.176	0.3968	0.21	0.3458	0.3219	0.4109	0.5577	0.8984	1.8705	1.3422	2.1069	0.9757	2.0412	0.8589	1.0202	1.8136	1.5456	1.9254	1.9059	1.0071	0.5717	1.7669	0.9812	0.6143	0.9047	0.4519	1.3571
S-adenosylhomocysteine (SAH)	0.8517	0.8727	0.7803	0.9978	0.8434	1.1235	1.1355	0.8557	0.8901	0.9181	1.2083	1.1139	0.8858	0.9882	1.2183	1.1972	1.0022	0.9205	0.7704	1.0083	0.9265	1.2866	0.9446	0.9023	1.1216	0.9158	1.1614	1.2052	0.9098	1.1428	1.3797
S-adenosylmethionine (SAM)	0.9339	1.2746	1.011	1.4657	1.3041	1.0208	1.0735	0.9067	0.8604	0.9827	1.0627	1.229	1.1858	1.0248	1.2282	1.2691	1.3631	1.1161	0.9313	1.4453	1.0049	1.1763	1.0868	0.9274	0.6458	0.6748	0.5898	0.5609	0.5498	0.7206	0.867
S-methylcysteine	1.3981	2.0016	1.4379	2.1582	1.5345	0.8243	0.7719	0.7096	0.7631	0.9088	1.4086	0.9411	1.2185	1.0637	1.1626	1.3565	1.4064	0.5473	0.4637	0.557	0.5815	0.6064	0.5152	0.4743	0.8972	1.029	1.0078	0.7998	0.7206	1.2088	1.4983
S-methylglutathione	1.821	2.0678	1.905	2.6003	2.2597	1.211	1.1924	0.5773	0.968	0.9528	0.7767	0.5868	0.8554	1	0.881	0.7292	0.9425	0.9903	1.022	1.7005	1.2696	1.1023	1.1172	1.0571	0.8377	1.0245	0.4209	0.4209	0.6084	0.8335	1.1018
sedoheptulose	0.4005	0.4246	0.4005	0.6857	0.4005	0.6398	0.5675	0.6151	0.6753	0.4755	0.9848	1.3678	1.8803	1.1056	2.0902	1.6223	1.5516	1.2201	1.4382	2.1017	1.7501	1.8057	1.3864	1.2476	0.7196	0.9414	0.5534	0.4005	0.4481	0.7264	0.907
sedoheptulose-7-phosphate	0.1128	0.1404	0.1215	0.0723	0.1355	0.1798	0.1328	0.2578	0.1979	0.1506	0.8558	1.1187	1.0305	1.06	1.2074	1.0951	1.1696	1.0052	0.8462	1.5222	1.0874	1.2346	0.9271	1.0283	0.9948	1.2156	0.8206	0.5265	0.8123	0.895	1.1771
serine	1.0428	1.3633	1.0632	1.4242	0.9686	0.8455	0.8311	0.6665	0.6772	0.8666	0.8785	1.0038	1.0143	0.9982	0.9916	1.0945	1.1139	1.1318	1.0667	1.2639	1.1744	1.3075	1.1178	0.9982	1.0873	0.8818	0.9131	0.8433	0.7898	0.9686	1.053
serylglutamate	0.6484	1.0156	0.6529	1.157	0.9402	1.0505	1.0557	0.6567	0.7506	0.844	0.9137	1.1988	1.0964	0.8967	1.0471	1.2289	1.1686	1.069	1.0702	1.235	1.1418	1.3782	0.9839	1.1118	0.8216	0.844	0.4221	0.5394	0.6229	0.9797	1.1478
serylglycine	0.479	0.5812	0.4238	0.6463	0.5091	0.715	0.5845	0.5131	0.4999	0.5386	0.9983	1.2317	1.0828	0.9948	1.162	1.3249	1.1492	1.1699	1.1024	1.1792	1.1968	1.2869	0.9801	1.0357	1.1325	1.0599	0.9014	0.6828	0.7301	1.0637	1.198
spermidine	1.0294	1.4582	0.997	1.6902	1.2926	1.3381	1.5271	1.0203	1.1571	1.3529	0.7406	0.897	1.1027	0.7375	1.0988	1.1577	1.2468	1.2536	1.1	1.5754	1.2325	1.5088	1.2308	1.003	0.4337	0.3812	0.3426	0.4032	0.3291	0.5935	0.7861
spermine	0.3782	0.5311	0.3522	0.756	0.3629	0.6385	0.6438	0.7272	0.4347	0.9652	0.6462	1.1463	1.7408	1.1193	0.8756	1.3468	1.0096	2.2092	1.1994	1.4152	1.6963	1.6895	2.2614	0.8181	0.6701	0.4948	0.7624	0.9106	0.6074	0.8691	1.0913
sphingadienine	0.0728	0.113	0.0547	0.1039	0.1078	0.2847	0.3046	0.2277	0.2321	0.2264	0.9302	0.8732	0.7801	0.6993	0.664	0.7948	0.843	1.207	1.2111	1.264	1.4326	1.3995	1.1901	1.1115	1.2942	1.1766	1.0007	0.9993	0.9846	1.1939	1.2029
sphinganine	0.1881	0.2186	0.1478	0.1832	0.1763	0.3349	0.384	0.2989	0.2945	0.2968	0.7886	0.8075	0.7895	0.7515	0.7803	0.8768	0.8302	1.831	1.853	2.0253	2.0453	2.4655	1.8366	1.6465	1.2725	1.0944	1.0734	0.9565	0.8966	1.1264	1.3807
sphingosine	0.0805	0.1297	0.0884	0.1275	0.0888	0.1361	0.1368	0.1108	0.1153	0.1318	0.4595	0.4666	0.4882	0.3955	0.4467	0.4873	0.5073	1.0837	1.0404	1.1176	1.1825	1.2667	1.0335	0.8822	1.4093	1.2877	1.1656	1.1515	1.0484	1.2322	1.4174
stachydrine	2.1496	3.7095	2.666	4.0705	2.2588	0.2959	0.4317	0.1727	0.2474	0.2737	0.3975	0.533	0.4511	0.4982	0.5919	0.6686	0.7923	2.0139	1.9988	2.878	2.5503	2.8094	2.5847	1.7161	1.0103	0.9563	0.9027	0.9897	0.8397	1.0255	1.5774
stearoyl ethanolamide	0.1913	0.3302	0.2415	0.3189	0.2994	0.3266	0.2762	0.2469	0.2426	0.3313	0.3882	0.325	0.4232	0.2923	0.4305	0.4126	0.3758	1.4267	1.2963	1.4305	1.2605	1.5192	1.1135	0.9059	1.9096	1.1836	1.099	0.9844	1.0156	1.153	1.4058
stearoylcarnitine (C18)	0.1509	0.1991	0.1402	0.1999	0.1487	0.4203	0.4967	0.3101	0.3308	0.3623	0.8566	0.7177	0.8989	0.6711	0.728	0.7808	0.6415	1.6553	1.3891	1.4355	1.2108	1.6223	1.0261	0.9157	1.3093	1.0449	1.0451	1.0743	1.0623	0.9739	1.0929
succinylcarnitine (C4-DC)	0.7154	0.8534	0.7479	0.9996	0.7868	1.1285	1.2082	1.0786	1.07	1.216	0.7934	1.2004	1.0879	1.0129	1.3052	1.1319	1.4154	1.0232	0.9203	1.5428	1.1597	1.053	1.1502	0.9466	0.6627	0.5246	0.5161	0.494	0.6392	0.6825	0.7215
tartronate (hydroxymalonate)	1.066	1.2933	1.2284	1.2526	1.0826	1.1037	0.9664	0.8501	1.0306	1.1049	0.5787	0.6713	0.9948	0.7287	1.0982	0.7011	0.8619	0.9871	1.0056	1.5588	1.0052	1.5946	1.363	1.0455	0.6801	0.919	0.7394	0.7078	0.8215	0.7505	1.2367
taurine	1.1695	1.2887	1.1368	1.3883	1.1404	1.1248	1.0864	0.9739	0.953	1.1211	0.9691	1.0071	1.0026	1.0093	1.066	1.1015	1.1195	1.0163	0.9965	1.0785	1.1031	1.1504	1.0419	0.9612	0.7791	0.7434	0.7397	0.7265	0.7035	0.83	0.8468
thiamin (Vitamin B1)	0.3478	0.611	0.2844	0.701	0.3522	0.3482	0.4253	0.2658	0.3396	0.5051	0.8844	0.683	0.654	0.6848	1.0905	1.1687	1.0845	1.7564	1.2725	2.0767	1.7826	2.165	1.4889	1.2999	1.0139	0.8661	1.065	0.6797	0.6438	1.0976	1.4372
thiamin monophosphate	0.25	0.3169	0.2708	0.4902	0.2877	0.2914	0.3734	0.2421	0.2782	0.3321	0.7031	0.9371	1.0585	0.9814	0.8872	0.8971	1.0681	1.4127	1.276	1.5357	1.5098	1.6786	1.5474	1.3449	1.0082	1.0394	1.0383	0.9422	0.9739	1.2455	1.2796
threonate	0.7989	1.1408	0.7343	1.4534	0.811	0.9689	1.2462	0.937	0.7713	1.0424	0.4743	1.5706	1.4507	1.5411	1.3952	1.8436	1.5449	1.2532	1.1849	1.0026	1.2073	1.0878	0.9751	1.0062	0.5668	0.4344	0.5588	0.6344	0.4629	0.5598	0.4014
threonine	0.983	1.2697	0.9316	1.4539	0.8385	0.9977	1.0459	0.8141	0.7995	1.0377	0.8799	0.967	0.9961	0.9781	0.9109	1.0852	1.1084	1.183	1.1253	1.2603	1.2938	1.3803	1.1389	0.9988	1.1009	0.9264	0.8257	0.7866	0.7953	1.1787	1.2062
thymidine	1.107	1.5749	1.0523	1.6006	0.9588	1.1464	1.3569	0.9939	1.1564	1.1995	1.1108	1.1669	1.1399	1.0796	1.1021	1.1884	1.3453	0.808	0.841	1.1409	0.963	1.0608	1.0917	0.7781	0.4955	0.4387	0.4598	0.5306	0.4079	0.5387	0.5202
trans-4-hydroxyproline	3.7204	3.6903	3.5154	3.8704	3.873	3.0871	3.3879	3.2942	3.5224	3.2733	2.1409	2.191	2.2927	1.9102	2.4954	2.3032	2.5548	0.9726	0.8936	0.9863	0.9351	1.0664	0.892	0.8311	0.8177	0.7028	0.7452	0.537	0.6845	0.8015	0.7903
trigonelline (N'-methylnicotinate)	1.1126	2.0721	1.0544	1.9877	1.7247	0.4328	0.5438	0.3849	0.3964	0.432	0.3556	0.3691	0.3933	0.3412	0.4761	0.5731	0.6036	2.2973	1.793	3.0698	2.6671	2.7503	2.5925	1.8809	1.1168	0.9287	0.936	0.8566	0.775	1.134	1.2639
trimethylamine N-oxide	0.9254	1.4421	0.911	1.1106	0.19	0.7503	0.19	1.0523	0.8115	1.0023	0.8813	0.6636	0.19	0.9161	0.9702	0.19	0.6341	1.4166	1.2723	1.6744	1.8423	1.9274	1.6281	1.3831	1.0666	0.8319	0.19	0.8483	0.9474	1.1368	1.3991
tryptophan	1.3613	1.8475	1.6999	2.4283	0.9379	0.93	0.958	0.7567	0.7872	0.9124	0.8817	1.0015	1.1412	0.9217	1.042	1.0833	1.1411	1.1997	1.1203	1.2984	1.1568	1.3568	1.1422	1.0403	0.9728	0.9537	0.8417	0.7169	0.8052	0.967	1.0982
tyrosine	0.809	1.0258	0.8266	1.1211	0.9998	1.0046	1.1134	0.8555	1.017	0.9025	0.8144	1.0002	1.0992	0.8761	1.1574	1.1639	1.1664	1.0514	0.9937	1.4275	1.3477	1.121	1.3999	1.0806	0.7988	0.981	0.8947	0.8159	0.6876	0.9743	1.2816
UDP-galactose	3.5049	4.1255	3.1575	4.4645	3.7123	3.5218	3.838	2.9049	3.0448	3.518	1.6068	1.4689	1.4201	1.4299	0.8168	1.5896	1.3942	0.8356	0.7421	0.3527	0.8418	0.6317	1	0.6747	0.4356	0.2832	0.4324	0.7809	0.6804	0.4336	0.5906
UDP-glucose	8.7904	10.1545	9.2261	11.525	9.7375	9.2293	7.8579	6.7969	6.8054	8.156	0.9926	1.2792	1.0221	1.2906	0.7041	1.4406	1.3694	0.8306	0.8816	0.5458	0.7665	0.9129	1.3018	0.664	0.6447	0.4045	0.8153	0.9008	1.3113	0.8544	1.492
UDP-glucuronate	5.982	6.4953	5.4897	8.0684	6.3637	4.2466	4.7851	3.2783	4.9177	4.065	2.6926	2.0827	2.0127	2.3608	1.6576	2.9344	3.2821	0.6394	0.5178	0.9468	0.7104	0.7184	0.7812	0.8804	0.3405	0.2268	0.4361	0.6571	0.3833	0.3798	0.3241
UDP-N-acetylglucosamine/galactosamine	2.0387	2.4149	1.8266	2.9232	1.8713	1.798	2.124	1.5656	1.5051	1.9167	1.0867	1.4266	1.3502	1.2837	1.3762	1.5776	1.597	0.9969	0.6985	1.0416	0.9471	0.9793	0.9194	0.7973	0.3838	0.328	0.3551	0.4185	0.3761	0.413	0.4252
uracil	0.3179	0.3974	0.3043	0.4722	0.3043	0.4578	0.4892	0.3376	0.3223	0.4715	0.7224	0.9479	1.1856	0.9215	1.2368	1.1426	1.1545	1.5357	1.3995	1.6577	1.4699	1.7419	1.2688	1.1285	0.9973	1.0122	0.7932	0.799	0.7225	0.8791	1.1283
urate	0.6444	0.2831	0.6506	0.4171	0.7737	0.6392	0.3336	0.5279	0.4793	0.6116	0.6984	0.4419	0.6784	0.3226	1.0245	0.8506	0.9468	1.4591	1.5038	1.4779	1.2625	1.0237	0.6261	1.165	1.0948	1.2201	1.5014	1.184	1.2611	1.2658	0.9871
urea	2.1359	2.1916	1.6401	2.6699	1.8301	0.8427	1.0305	0.6458	0.6555	0.9417	0.7725	0.8479	0.8869	0.9426	0.7794	0.9939	0.9307	1.1039	1.1204	1.0563	1.0681	1.2691	1.1813	0.9951	0.9667	0.7884	0.9109	0.7984	0.7441	1.0112	0.9614
uridine	1.1852	1.343	1.1723	1.5611	0.9928	1.1717	0.9337	0.9723	0.8763	1.1371	1.0592	0.8628	1.2282	1.2544	1.0652	0.9537	1.1791	1.0189	0.9526	1.1007	1.3384	1.2867	1.2844	0.9334	0.9296	0.6584	0.9783	0.8351	0.754	1.0006	0.9184
valine	1.1322	1.4515	1.1054	1.7953	1.0663	0.9843	1.0177	0.7833	0.7223	1.021	0.8381	0.9596	0.9828	0.8214	1.0312	1.1529	1.1685	1.4929	1.3064	1.577	1.4212	1.6725	1.3182	1.1504	0.9826	0.8945	0.8605	0.7697	0.7497	0.9393	0.9985
xanthine	0.1925	0.2803	0.1891	0.2853	0.2279	0.2776	0.2676	0.2054	0.2113	0.2379	0.7397	0.6752	0.8095	0.676	0.9007	0.694	0.7678	1.552	1.3607	1.676	1.5335	1.6116	1.3495	1.3087	1.1948	1.1018	1.088	1.0034	0.9966	1.1943	1.2378
xanthosine	0.4655	0.6707	0.4709	0.6979	0.5202	0.4758	0.4785	0.3976	0.3604	0.3219	0.2916	0.2539	0.2889	0.2481	0.294	0.3082	0.3299	1.1715	1.1413	1.3949	1.1962	1.1561	1.3305	0.9646	1.4388	1.1347	1.4153	1.7798	1.0354	1.6214	1.1544
xylulose 5-phosphate	0.0916	0.2179	0.0916	0.3367	0.2663	0.6089	0.2693	0.2704	0.4054	0.3392	0.6035	1.3026	1.6125	0.8445	1.1997	1.4044	1.6315	1.1476	0.7507	1.618	1.1679	2.4092	1.9955	0.9013	0.8856	1.1994	0.7109	0.4844	1.0208	0.9052	2.288
Figure 3b
#	Metabolite	PN1 vs. PN80	PN7 vs. PN80	PN17 vs. PN80	PN24 vs. PN80			Significantly downregulated
1	sphinganine	-2.64386	-1.78588	-0.473931	0.815575			Significantly upregulated
2	cystathionine	4.10518	3.25701	1.74846	0.782409			Non-significant change
3	1-ribosyl-imidazoleacetate	6.57183	1.64616	3.94111	1.87184
4	gulonate	4.60644	2.28688	1.31034	0.903038
5	N-acetylneuraminate	-1.88897	-1.08927	0.333424	0.584963
6	arachidonoylcarnitine (C20:4)	-4.05889	-2	0.238787	0.704872
7	cytidine 5'-monophosphate (5'-CMP)	2.43296	1.98185	1.44361	1.08406
8	homoarginine	3.53978	1.926	2.34483	1.79077
9	putrescine	4.07468	3.3978	1.33342	1.14405
10	orotidine	3.37016	2.94111	2.33056	1.45418
11	3-hydroxybutyrylcarnitine (1)	1.42223	2.82579	3.62527	1.0072
12	UDP-glucuronate	4.04527	3.43962	2.63227	0.918386
13	N-delta-acetylornithine	-0.0892673	-3.8365	-2.18442	0.526069
14	trans-4-hydroxyproline	2.36457	2.19219	1.64616	0.378512
15	3-methoxytyrosine	1.87184	3.45154	4.51223	1.13093
16	adenine	-2.94342	-2.8365	-2.47393	-1
17	citrate	-2.73697	-2.39593	-1.39593	-1
18	linoleoylcarnitine (C18:2)	-3.18442	-0.234465	0.659925	0.367371
19	guanine	3.89239	2.81762	1.59932	0.659925
20	N-acetylarginine	-3.05889	-2.32193	-0.37707	0.678072
21	imidazole propionate	1.32769	-1.78588	1.08406	1.95606
22	myristoylcarnitine (C14)	-4.05889	-1.94342	0.226509	0.565597
23	dimethylarginine (SDMA + ADMA)	1.95977	1.04264	0.575312	0.815575
24	3-hydroxy-3-methylglutarate	1.31615	2.21412	1.93357	1.20789
25	allantoin	4.01703	2.62527	2.28392	1.03562
26	2-hydroxybutyrate/2-hydroxyisobutyrate	1.13093	1.03562	1.67807	0.687061
27	imidazole lactate	1.36177	1.34483	2.47768	1.08406
28	2-methylcitrate/homocitrate	-2.05889	-0.915936	0.443607	0.903038
29	glucuronate	2.68257	2.04614	1.0072	1.07039
30	cytosine	3.91934	3.27352	1.73118	2.40054
