# Supplementary material for: Metabolomic profiling reveals a differential role for hippocampal glutathione reductase in infantile memory formation
Source: eLife. 2021 Nov 26;10:e68590. doi: 10.7554/eLife.68590 (PMC8626085; doi:10.7554/eLife.68590)
Supplement: Figure 4—source data 1. [file elife-68590-fig4-data1.xlsx]

## Sheet: Figure 4-Source Data 1
Figure 4-Source Data 1
Figure 4
Pathway	Metabolite	PN1 vs. PN80	PN7 vs. PN80	PN17 vs. PN80	PN24 vs. PN80			Significantly downregulated
Glycolysis, Gluconeogenesis, and Pyruvate Metabolism	1,5-anhydroglucitol (1,5-AG)	0.0771884	0.197264	1.12194	0.22004			Significantly upregulated
	glucose	0.896592	0.369902	0.957366	1.06942			Non-significant change
	glucose 6-phosphate	-2.22187	-1.7814	0.867619	0.969295		NA	Not quantified
	fructose 1,6-diphosphate/glucose 1,6-diphosphate/myo-inositol diphosphates	-2.74703	-1.8432	-0.96049	-0.671596
	dihydroxyacetone phosphate (DHAP)	-2.8535	-2.34933	-0.582127	-0.273892
	3-phosphoglycerate	1.75674	0.884863	0.209162	0.206189
	phosphoenolpyruvate (PEP)	1.47864	0.627571	0.227194	0.194937
	pyruvate	-1.76479	-1.57322	0.423642	0.756103
	lactate	-0.840784	-0.985636	-0.261843	0.152917
	glycerate	1.27371	0.871673	0.611072	0.85569
Pentose Phosphate Pathway	6-phosphogluconate	0.750838	1.70873	1.49221	0.969478
	ribulose 5-phosphate	-2.3875	-1.4943	0.558749	0.600024
	ribose 5-phosphate	NA	-1.45543	0.453868	0.48563
	ribose 1-phosphate	0.311793	-0.0778734	-2.00972	-0.0550191
	5-phosphoribosyl diphosphate (PRPP)	-1.17578	-1.20595	-1.83962	-0.376373
	sedoheptulose-7-phosphate	-2.98177	-2.32397	0.22644	0.248117
Pentose Metabolism	ribose	0.34897	0.290114	0.0940965	0.882737
	ribitol	-0.678748	-1.02139	-0.813106	-0.252244
	ribonate	0.866724	-0.306898	-0.084558	0.472051
	xylulose 5-phosphate	-2.41459	-1.49929	0.198361	0.414768
	arabinose	-0.730111	-1.24152	0.481095	0.474852
	arabitol/xylitol	-0.657556	-1.41748	-0.39777	-0.0832691
	ribulose/xylulose	NA	-0.898088	1.24233	1.36165
	arabonate/xylonate	0.389807	-0.308533	0.333739	0.578433
	sedoheptulose	-0.536956	-0.173936	1.17477	1.22135
	ribulonate/xylulonate	0.211766	0.00305485	0.478213	0.894316
Glycogen Metabolism	maltotetraose	7.39776	4.4629	2.25602	1.43589
	maltotriose	5.19645	2.61589	1.35722	1.01646
	maltose	4.0317	1.49764	0.685722	0.660582
Fructose, Mannose and Galactose Metabolism	fructose	0.564756	-0.0868995	0.091136	0.24494
	mannitol/sorbitol	-0.614316	-1.0447	-0.528881	0.0618384
	mannose	-1.04321	-0.300985	1.00496	1.0918
	mannose-6-phosphate	-2.12054	-1.61282	0.705196	0.958392
	galactitol (dulcitol)	0.160702	0.255397	0.80869	0.463047
	galactose 1-phosphate	NA	NA	-0.78631	0.68646
Nucleotide Sugar	UDP-glucose	3.42955	3.08181	0.334327	-0.121819
	UDP-galactose	2.86811	2.69563	1.41937	0.481852
	UDP-glucuronate	4.04518	3.43958	2.63132	0.918921
	UDP-N-acetylglucosamine/galactosamine	2.52169	2.20787	1.84475	1.24061
	cytidine 5'-monophospho-N-acetylneuraminic acid	0.162589	-0.119331	0.859366	1.05167
Aminosugar Metabolism	glucosamine-6-phosphate	NA	NA	0.896632	1.00589
	glucuronate	2.68237	2.04476	1.00665	1.07339
	N-acetylglucosamine 6-phosphate	-1.20487	-0.803517	-0.617796	0.676838
	N-acetyl-glucosamine 1-phosphate	1.58047	0.764336	0.212557	0.602122
	N-acetylneuraminate	-1.87933	-1.0756	0.335379	0.580258
	N-acetylglucosaminylasparagine	0.147388	-0.437447	-0.357954	0.224773
	erythronate	0.314896	-0.75861	-0.24053	0.485239
	N-acetylglucosamine/N-acetylgalactosamine	-0.610043	0.0264443	0.70901	0.552995
	N6-carboxymethyllysine	-1.69297	NA	NA	-0.420642
TCA Cycle	citrate	-2.75902	-2.38167	-1.40684	-0.996767
	aconitate [cis or trans]	-2.30081	-2.41325	-1.6246	-1.05717
	isocitric lactone	-0.832561	-0.563101	-0.00302797	-0.307697
	alpha-ketoglutarate	1.1172	1.20903	1.13952	0.547935
	succinylcarnitine (C4-DC)	0.437838	0.912373	0.90616	0.878447
	fumarate	-0.104885	-0.0106034	0.34489	0.625836
	malate	0.0489206	0.0631844	0.357857	0.433008
	2-methylcitrate/homocitrate	-2.04874	-0.923186	0.448052	0.90389
Oxidative Phosphorylation	acetylphosphate	-1.07363	-0.902634	0.132689	0.136995
	phosphate	-0.394838	-0.347374	-0.0599495	0.0917235
