# Supplementary material for: Metabolomic profiling reveals a differential role for hippocampal glutathione reductase in infantile memory formation
Source: eLife. 2021 Nov 26;10:e68590. doi: 10.7554/eLife.68590 (PMC8626085; doi:10.7554/eLife.68590)
Supplement: Figure 5—source data 1. [file elife-68590-fig5-data1.xlsx]

## Sheet: Figure 5-Source Data 1
Figure 5-Source Data 1
Figure 5a-c
	Trained / Naïve			PN17 Trained / PN17 Naïve		PN24 Trained / PN24 Naïve		PN80 Trained / PN80 Naïve
Metabolite	PN17	PN24	PN80	p-value	q-value	p-value	q-value	p-value	q-value
glycine	-0.200913	0.0143553	0.0840643	0.0209	0.1058	0.8377	1	0.3068	0.9286
dimethylglycine	-0.152003	0.0703893	0.137504	0.3719	0.4483	0.6078	1	0.4591	0.9577
betaine	-0.200913	0	-0.152003	0.0927	0.2022	0.9726	1	0.2635	0.8797
betaine aldehyde	0.176323	0.0976108	0.0285692	0.8589	0.7235	0.7438	1	0.8357	1
serine	-0.200913	-0.0144996	0.0565835	0.0154	0.0889	0.9181	1	0.4839	0.9577
N-acetylserine	-0.0439433	0	0.0285692	0.7454	0.6728	0.9942	1	0.7492	1
2-methylserine	-0.184425	0.0976108	-0.0892673	0.5937	0.5854	0.3778	1	0.9961	1
threonine	-0.217591	-0.0291463	0.0143553	0.0196	0.1045	0.7827	1	0.7063	0.9963
N-acetylthreonine	-0.104697	-0.0588937	-0.0144996	0.5039	0.5406	0.8069	1	0.8738	1
allo-threonine	-0.286304	-0.0892673	-0.0291463	0.048	0.156	0.492	1	0.6552	0.9955
alanine	-0.268817	-0.0588937	0.0565835	0.0025	0.0466	0.5314	1	0.508	0.9577
N-acetylalanine	-0.286304	-0.0892673	-0.0291463	0.0337	0.1274	0.5233	1	0.9967	1
N-methylalanine	0.344828	-0.836501	0.0143553	0.3308	0.4163	0.0859	1	0.848	1
aspartate	-0.120294	0.0565835	0.15056	0.1427	0.2569	0.4504	1	0.0546	0.5168
N-acetylaspartate (NAA)	-0.152003	-0.0144996	0.0143553	0.0079	0.0678	0.8693	1	0.8162	1
asparagine	-0.340075	-0.0291463	0.0565835	0.0027	0.0466	0.8041	1	0.5273	0.9577
N-acetylasparagine	-0.0291463	0.111031	0.0976108	0.9787	0.7515	0.5559	1	0.5731	0.9955
glutamate	-0.136062	0.0143553	0.0703893	0.0121	0.0806	0.7266	1	0.1507	0.7772
glutamine	-0.217591	0.0565835	0.163499	0.0028	0.0466	0.4965	1	0.0271	0.3744
alpha-ketoglutaramate	0.378512	0.0285692	-0.304006	0.3291	0.4163	0.9749	1	0.3233	0.9349
N-acetylglutamate	-0.0740006	0.0143553	0.15056	0.279	0.3823	0.8646	1	0.0254	0.3744
N-acetylglutamine	-0.184425	0.286881	0.214125	0.4367	0.4901	0.2158	1	0.4111	0.9577
glutamate, gamma-methyl ester	-0.217591	0.189034	0.0703893	0.0799	0.1829	0.1276	1	0.5358	0.9653
pyroglutamine	-0.0740006	0.0285692	0.137504	0.1619	0.2749	0.6743	1	0.0295	0.3823
N-acetyl-aspartyl-glutamate (NAAG)	-0.184425	0.0143553	0.0703893	0.0035	0.0473	0.7863	1	0.2005	0.8294
beta-citrylglutamate	-0.184425	-0.0144996	0.0565835	0.0256	0.1105	0.8658	1	0.4273	0.9577
gamma-aminobutyrate (GABA)	-0.200913	0.0565835	0.0840643	0.0023	0.0463	0.3209	1	0.1951	0.8294
carboxyethyl-GABA	-0.0291463	-0.0144996	0.0426443	0.999	0.7515	0.9021	1	0.728	0.9963
N-methyl-GABA	0.238787	-0.0291463	0.263034	0.1572	0.2729	0.9482	1	0.3628	0.9359
S-1-pyrroline-5-carboxylate	-0.0740006	0.263034	0.333424	0.2887	0.387	0.4544	1	0.3945	0.9577
histidine	-0.217591	0.0143553	0.0285692	0.0076	0.0666	0.8514	1	0.6097	0.9955
1-methylhistidine	0.250962	0.286881	-0.0588937	0.5076	0.5425	0.275	1	0.8885	1
3-methylhistidine	-0.0439433	0.0840643	0.124328	0.8131	0.7022	0.7075	1	0.7195	0.9963
N-acetylhistidine	0.0285692	0.367371	0.31034	0.9204	0.7371	0.1429	1	0.4158	0.9577
N-acetyl-1-methylhistidine	-0.136062	0.475085	0.422233	0.7429	0.6723	0.1358	1	0.181	0.8294
imidazole propionate	0	-0.184425	0.604071	0.9186	0.7371	0.4103	1	0.0031	0.1289
formiminoglutamate	-0.340075	-0.0892673	0.0703893	0.1428	0.2569	0.6184	1	0.7552	1
imidazole lactate	-0.321928	0	0.137504	0.1257	0.2403	0.988	1	0.5482	0.9838
carnosine	-0.200913	-0.136062	0.0426443	0.2433	0.3488	0.366	1	0.8206	1
homocarnosine	-0.168123	-0.104697	0.15056	0.1662	0.278	0.3714	1	0.2477	0.8797
1-methyl-4-imidazoleacetate	-0.152003	0.124328	0.604071	0.1759	0.2886	0.2432	1	2.0179e-06	0.0009
1-ribosyl-imidazoleacetate	-0.599462	0	0.0285692	0.0591	0.1716	0.6891	1	0.9076	1
4-imidazoleacetate	-0.514573	-0.621488	0.815575	0.3087	0.4035	0.0745	1	0.4339	0.9577
lysine	-0.217591	0.0285692	0.0565835	0.0063	0.0666	0.7448	1	0.455	0.9577
N6,N6,N6-trimethyllysine	-0.340075	0.111031	-0.136062	0.0857	0.1936	0.5291	1	0.6615	0.9955
5-(galactosylhydroxy)-L-lysine	-0.168123	-0.0144996	0.0285692	0.0894	0.1981	0.9343	1	0.5905	0.9955
saccharopine	-0.321928	-0.120294	0.333424	0.2556	0.3567	0.4071	1	0.1601	0.7985
2-aminoadipate	-0.120294	-0.251539	0.124328	0.5917	0.5851	0.1395	1	0.4298	0.9577
glutarylcarnitine (C5-DC)	-0.340075	0.0285692	-0.0588937	0.0663	0.1738	0.8867	1	0.6971	0.9963
pipecolate	-0.217591	0.0565835	0	0.1369	0.2511	0.6289	1	0.9581	1
5-aminovalerate	0.176323	-0.0144996	-0.136062	0.3502	0.4298	0.9975	1	0.4285	0.9577
N-trimethyl 5-aminovalerate	-0.184425	0.0426443	-0.514573	0.3593	0.4377	0.7959	1	0.0175	0.3616
phenylalanine	-0.217591	0.0426443	0.0426443	0.0215	0.1065	0.5959	1	0.6086	0.9955
N-acetylphenylalanine	-0.0439433	0.163499	0.0840643	0.8835	0.7334	0.5438	1	0.5703	0.9955
tyrosine	-0.200913	0.0426443	0.0143553	0.0714	0.1753	0.59	1	0.6954	0.9963
N-acetyltyrosine	0.0285692	0.432959	-0.136062	0.8969	0.7354	0.086	1	0.796	1
4-hydroxyphenylpyruvate	0.411426	-0.136062	0	0.1746	0.2884	0.6106	1	0.9861	1
3-(4-hydroxyphenyl)lactate	0.0143553	0.0565835	-0.0588937	0.9249	0.7372	0.4879	1	0.7132	0.9963
phenol sulfate	0.214125	0.464668	-0.200913	0.6328	0.6101	0.1301	1	0.3481	0.9359
3-methoxytyrosine	-0.286304	-0.0892673	-0.217591	0.4328	0.4897	0.832	1	0.6304	0.9955
o-Tyrosine	-0.514573	-0.0439433	0.201634	0.0109	0.0759	0.8114	1	0.1722	0.8269
dopamine 4-sulfate	0.526069	-0.268817	0	0.3011	0.3974	0.3724	1	1	1
dopamine 3-O-sulfate	-0.0588937	-0.0740006	-0.304006	0.7288	0.663	0.7971	1	0.173	0.8269
N-formylphenylalanine	-0.0588937	0.226509	0.0976108	0.7266	0.6628	0.2654	1	0.6584	0.9955
tryptophan	-0.268817	0	0.0840643	0.0062	0.0666	0.9872	1	0.3626	0.9359
C-glycosyltryptophan	-0.104697	0	0.0143553	0.2292	0.3426	0.8851	1	0.8538	1
kynurenine	0.0840643	0.485427	0.137504	0.6783	0.6393	0.0166	1	0.3186	0.9338
N-acetylkynurenine (2)	0.137504	0	0	0.3826	0.4559	1	1	1	1
N-formylanthranilic acid	0.356144	-0.37707	0.0976108	0.1261	0.2403	0.1586	1	0.7423	1
5-hydroxyindoleacetate	-0.217591	0.15056	0.226509	0.0698	0.175	0.2103	1	0.0636	0.5777
3-indoxyl sulfate	0	0.0143553	-0.268817	1	0.7515	0.8211	1	0.1728	0.8269
leucine	-0.234465	0.0426443	0.0565835	0.025	0.1101	0.6516	1	0.5846	0.9955
N-acetylleucine	-0.152003	0.0426443	-0.0291463	0.4769	0.5149	0.8537	1	0.9609	1
4-methyl-2-oxopentanoate	0.748461	-0.0892673	-0.0740006	0.0624	0.1738	0.7735	1	0.8492	1
isovalerylcarnitine (C5)	-0.304006	-0.0291463	0.189034	0.0274	0.114	0.8527	1	0.1922	0.8294
beta-hydroxyisovalerate	-0.0740006	0.0976108	0.124328	0.5332	0.5567	0.4383	1	0.3605	0.9359
3-methylglutaconate	-0.304006	0.111031	0.214125	0.0789	0.182	0.3938	1	0.2231	0.8513
isoleucine	-0.234465	0.0426443	0.0703893	0.0247	0.1101	0.7009	1	0.4958	0.9577
N-acetylisoleucine	-0.200913	0.15056	0.238787	0.4602	0.5034	0.4423	1	0.2945	0.9286
3-methyl-2-oxovalerate	0.356144	0	0	0.0605	0.172	1	1	1	1
alpha-hydroxyisovalerate	-0.136062	-0.0144996	0.263034	0.5519	0.5688	0.9931	1	0.2323	0.8716
2-methylbutyrylcarnitine (C5)	-0.37707	0.137504	0.286881	0.0975	0.2066	0.293	1	0.1978	0.8294
3-hydroxy-2-ethylpropionate	-0.168123	-0.0291463	0.263034	0.5706	0.5777	0.8978	1	0.435	0.9577
ethylmalonate	-0.304006	-0.217591	-0.0439433	0.1723	0.2867	0.592	1	0.8702	1
methylsuccinate	-0.152003	0.0703893	-0.0892673	0.2908	0.3875	0.5807	1	0.4934	0.9577
valine	-0.286304	0.0426443	0.0840643	0.0103	0.0759	0.6664	1	0.4727	0.9577
3-methyl-2-oxobutyrate	0.0976108	-0.0291463	0	0.5912	0.5851	0.8712	1	1	1
isobutyrylcarnitine (C4)	-0.286304	0.0426443	0.275007	0.0783	0.1818	0.9693	1	0.1169	0.7176
3-hydroxyisobutyrate	-0.321928	-0.0291463	0.124328	0.0708	0.1753	0.8983	1	0.5053	0.9577
methionine	-0.234465	0.0840643	0.0976108	0.0234	0.1101	0.3914	1	0.3117	0.9311
N-acetylmethionine	-0.184425	0.0285692	0.0143553	0.0637	0.1738	0.8012	1	0.9969	1
N-formylmethionine	-0.0892673	-0.0144996	0.0976108	0.3319	0.4163	0.9094	1	0.2593	0.8797
methionine sulfoxide	-0.0291463	-0.0291463	0	0.7527	0.674	0.8198	1	0.9526	1
N-acetylmethionine sulfoxide	0.0703893	0.0143553	0.0285692	0.4032	0.4679	0.9259	1	0.8052	1
S-adenosylmethionine (SAM)	-0.321928	-0.0291463	0.176323	0.0023	0.0463	0.8698	1	0.083	0.6387
S-adenosylhomocysteine (SAH)	-0.152003	0.0976108	0.0703893	0.1619	0.2749	0.4507	1	0.6537	0.9955
cystathionine	-0.217591	0	0.238787	0.0936	0.2022	0.9406	1	0.0624	0.5777
cysteine	-0.621488	0	0.321928	0.0029	0.0466	0.9646	1	0.094	0.6674
S-methylcysteine	-0.104697	0.137504	0.0840643	0.4	0.4661	0.33	1	0.3677	0.9431
cystine	1.73552	-0.395929	-0.434403	0.0088	0.0712	0.5644	1	0.1781	0.8294
cysteine sulfinic acid	0.275007	0.0143553	-0.0144996	0.1632	0.2757	0.9265	1	0.9831	1
hypotaurine	-0.184425	0.0426443	0.189034	0.0942	0.2022	0.6647	1	0.117	0.7176
taurine	-0.136062	-0.0588937	0.0426443	0.0109	0.0759	0.3273	1	0.4609	0.9577
N-acetyltaurine	-0.0291463	-0.0740006	-0.0892673	0.7861	0.6871	0.4959	1	0.6166	0.9955
taurocyamine	-0.234465	-0.136062	0	0.0661	0.1738	0.347	1	1	1
3-sulfo-L-alanine	0.286881	-0.0892673	-0.251539	0.2762	0.3799	0.7544	1	0.3844	0.9577
cyano-alanine	0	0.0703893	0.0143553	1	0.7515	0.7083	1	0.6428	0.9955
arginine	-0.184425	0.0143553	0.0426443	0.0406	0.1398	0.8258	1	0.525	0.9577
argininosuccinate	-0.37707	0.0143553	0.0976108	0.0141	0.0831	0.8406	1	0.4242	0.9577
urea	-0.0439433	0.0565835	0.263034	0.5456	0.5657	0.529	1	0.0138	0.3491
ornithine	-0.200913	0.0703893	0.15056	0.0457	0.1514	0.4362	1	0.1411	0.7763
2-oxoarginine	-0.251539	-0.0291463	-0.0439433	0.32	0.412	0.7743	1	0.9626	1
citrulline	0.0426443	0.111031	0.15056	0.5681	0.5777	0.1094	1	0.0218	0.3744
homoarginine	-0.200913	0.0565835	0.321928	0.1956	0.3148	0.6875	1	0.0275	0.3744
homocitrulline	-0.0439433	0.189034	-0.0588937	0.9189	0.7371	0.382	1	0.8702	1
proline	-0.200913	0.0143553	0	0.0117	0.0797	0.9294	1	0.9613	1
dimethylarginine (SDMA + ADMA)	-0.200913	-0.0144996	0.0565835	0.1125	0.2287	0.9551	1	0.7691	1
N-acetylarginine	-0.184425	0.0703893	0.15056	0.1405	0.2563	0.5714	1	0.2182	0.8513
N-acetylcitrulline	-0.251539	0.400538	0.0840643	0.1295	0.2438	0.023	1	0.7286	0.9963
N-delta-acetylornithine	0.0840643	0.31034	0.0285692	0.5883	0.5851	0.0735	1	0.7715	1
trans-4-hydroxyproline	-0.152003	0	0.0285692	0.0776	0.1813	0.9246	1	0.6709	0.9963
N-monomethylarginine	-0.304006	-0.0588937	0.0285692	0.0262	0.1119	0.6534	1	0.6516	0.9955
argininate	-0.251539	0.0426443	0.176323	0.2554	0.3567	0.7839	1	0.3042	0.9286
guanidinoacetate	-0.0291463	-0.0588937	0.176323	0.7781	0.686	0.5294	1	0.036	0.4166
creatine	-0.0892673	0	0.0285692	0.01	0.0758	0.8365	1	0.4812	0.9577
creatinine	-0.152003	0.0143553	0.0143553	0.0657	0.1738	0.8899	1	0.7571	1
putrescine	-0.168123	0.111031	-0.120294	0.1192	0.2351	0.3239	1	0.3188	0.9338
spermidine	-0.434403	-0.0144996	0.356144	0.0126	0.0809	0.9561	1	0.0164	0.3549
spermine	0.214125	0.124328	0.0703893	0.5125	0.5447	0.5829	1	0.7216	0.9963
5-methylthioadenosine (MTA)	-0.321928	0.0565835	0.163499	0.0191	0.1045	0.6744	1	0.1807	0.8294
N-acetylputrescine	-0.251539	0.0426443	0	0.0731	0.177	0.7853	1	0.8098	1
(N(1) + N(8))-acetylspermidine	-0.0740006	0.0565835	0.0840643	0.5827	0.5847	0.7877	1	0.7904	1
1-methylguanidine	-0.0144996	0	0.163499	0.8622	0.7245	0.9924	1	0.3903	0.9577
4-guanidinobutanoate	-0.168123	0.0285692	0.15056	0.1326	0.2459	0.7525	1	0.1292	0.7427
glutathione, reduced (GSH)	-0.268817	0.0565835	0.124328	0.0495	0.1564	0.6659	1	0.2998	0.9286
glutathione, oxidized (GSSG)	-0.68966	0.0565835	0.189034	0.0012	0.0463	0.7789	1	0.4197	0.9577
cysteine-glutathione disulfide	0.189034	-0.0740006	-0.0740006	0.1292	0.2438	0.5333	1	0.6211	0.9955
S-methylglutathione	-0.152003	0.111031	0.275007	0.3445	0.4264	0.5246	1	0.0779	0.6348
S-lactoylglutathione	-1.18442	0.189034	0.0426443	0.0065	0.0666	0.7185	1	0.9099	1
cysteinylglycine	0.321928	-0.0291463	0.176323	0.345	0.4264	0.5193	1	0.417	0.9577
cysteinylglycine disulfide	2.32769	0.0143553	-0.785875	0.001	0.0463	0.9729	1	0.0918	0.6674
5-oxoproline	-0.37707	-0.0144996	0.15056	0.0017	0.0463	0.9803	1	0.2119	0.8508
2-hydroxybutyrate/2-hydroxyisobutyrate	-0.184425	-0.0144996	0.0143553	0.1011	0.2103	0.7971	1	0.9902	1
ophthalmate	0	0.111031	0.356144	0.9245	0.7372	0.5691	1	0.0367	0.4166
4-hydroxy-nonenal-glutathione	0.124328	-0.0144996	-0.152003	0.2882	0.387	0.924	1	0.4425	0.9577
gamma-glutamylglutamate	-0.321928	-0.104697	0.0143553	0.0633	0.1738	0.479	1	0.9823	1
gamma-glutamylglutamine	-0.358454	0.0285692	0.238787	0.0036	0.0473	0.8345	1	0.041	0.4427
gamma-glutamylglycine	-0.321928	0.0565835	0.189034	0.1149	0.2307	0.7367	1	0.1988	0.8294
gamma-glutamylhistidine	-0.136062	0.0565835	0.555816	0.4554	0.502	0.7141	1	0.0013	0.1159
gamma-glutamylleucine	-0.473931	-0.0439433	0.0976108	0.0492	0.1564	0.8653	1	0.5988	0.9955
gamma-glutamyl-alpha-lysine	-0.152003	-0.0439433	0.344828	0.4618	0.5034	0.7903	1	0.0159	0.3549
gamma-glutamylmethionine	0	0.286881	0.31034	1	0.7515	0.0926	1	0.0821	0.6387
gamma-glutamylphenylalanine	0	0.0143553	0.0426443	0.9446	0.7462	0.9372	1	0.8177	1
gamma-glutamylthreonine	-0.340075	-0.104697	0.0840643	0.225	0.3412	0.5337	1	0.6397	0.9955
gamma-glutamyltyrosine	0	0.111031	-0.268817	1	0.7515	0.3265	1	0.3623	0.9359
gamma-glutamylvaline	-0.37707	0.0703893	0.275007	0.1052	0.2161	0.7489	1	0.2548	0.8797
gamma-glutamyl-2-aminobutyrate	-0.514573	0.0426443	-0.168123	0.1586	0.2732	0.927	1	0.6652	0.9963
alanylglycine	-0.358454	0.275007	0.0285692	0.2056	0.3217	0.3696	1	0.9008	1
alanylserine	0	0.163499	0.575312	1	0.7515	0.5	1	0.3588	0.9359
asparaginylalanine	-0.473931	-0.0740006	0.0703893	0.0138	0.0831	0.8296	1	0.6772	0.9963
asparaginylglutamate	-0.321928	-0.0291463	0.443607	0.0742	0.1772	0.8704	1	0.028	0.3744
aspartylaspartate	-0.358454	0.0143553	0.0840643	0.0358	0.1274	0.9822	1	0.6558	0.9955
aspartylglycine	-0.454032	-0.251539	0.0426443	0.0395	0.1377	0.2334	1	0.839	1
glutaminylglutamate	-0.37707	0.0426443	0	0.0314	0.1233	0.7944	1	0.9858	1
glycylalanine	-0.304006	0.0426443	-0.358454	0.3849	0.4559	0.9511	1	0.4311	0.9577
glycylaspartate	-0.251539	-0.0892673	0.111031	0.0515	0.1568	0.5545	1	0.3762	0.9577
glycylglutamate	-0.358454	-0.0291463	0.0426443	0.004	0.0491	0.7864	1	0.7027	0.9963
glycylglycine	-0.321928	0.0840643	-0.0144996	0.0211	0.1058	0.5783	1	0.9592	1
glycylhistidine	-0.434403	-0.200913	0.163499	0.232	0.3426	0.9876	1	0.7027	0.9963
glycylserine	-0.454032	-0.0439433	-0.0144996	0.0016	0.0463	0.7962	1	0.7951	1
histidylglutamate	-0.643856	0	0.0426443	0.0016	0.0463	0.9867	1	0.5114	0.9577
histidylglycine	-0.0588937	-0.0892673	0.250962	0.9865	0.7515	0.8717	1	0.261	0.8797
leucylproline	-0.268817	-0.268817	-0.104697	0.3352	0.4189	0.367	1	0.829	1
leucylserine	-0.168123	0.176323	0.422233	0.6847	0.6435	0.2999	1	0.1094	0.7176
methionylaspartate	-0.321928	0.137504	0.189034	0.0953	0.2033	0.3266	1	0.2168	0.8513
prolylalanine	-0.473931	0.124328	0.214125	0.0009	0.0463	0.2929	1	0.0789	0.6348
prolylglutamate	-0.286304	0.0840643	0.0840643	0.0246	0.1101	0.4824	1	0.478	0.9577
prolylglycine	-0.358454	0.0426443	0.163499	0.0226	0.1101	0.6769	1	0.262	0.8797
prolylproline	-0.37707	0.0426443	0.0703893	0.0284	0.1152	0.7395	1	0.7692	1
serylglycine	-0.37707	0	0.0143553	0.0019	0.0463	0.9818	1	0.8506	1
serylglutamate	-0.37707	0.0285692	0.214125	0.0174	0.097	0.8329	1	0.1478	0.7763
serylserine	-0.761213	-0.136062	0.163499	0.003	0.047	0.5794	1	0.5319	0.962
threonylisoleucine	-0.268817	-0.104697	0.0976108	0.0544	0.1644	0.485	1	0.4606	0.9577
1,5-anhydroglucitol (1,5-AG)	-0.340075	-0.0144996	-0.184425	0.0251	0.1101	0.8457	1	0.2573	0.8797
glucose	-0.168123	-0.152003	-0.268817	0.5323	0.5567	0.6086	1	0.2547	0.8797
glucose 6-phosphate	-0.473931	-0.251539	-0.0588937	0.13	0.2438	0.4689	1	0.7145	0.9963
fructose 1,6-diphosphate/glucose 1,6-diphosphate/myo-inositol diphosphates	0.201634	0.163499	-0.200913	0.203	0.3206	0.4795	1	0.2616	0.8797
dihydroxyacetone phosphate (DHAP)	-0.120294	-0.104697	-0.152003	0.2426	0.3488	0.2758	1	0.0931	0.6674
3-phosphoglycerate	0.0143553	-0.104697	-0.217591	0.8309	0.7123	0.1146	1	0.0011	0.1159
phosphoenolpyruvate (PEP)	0.0285692	-0.152003	-0.234465	0.7758	0.686	0.0269	1	0.001	0.1159
pyruvate	-0.234465	-0.0291463	0.124328	0.0599	0.1716	0.7506	1	0.3368	0.9359
lactate	-0.286304	-0.0291463	0.0285692	0.0038	0.0477	0.7595	1	0.7754	1
glycerate	0	0.0143553	0.0143553	0.7823	0.6871	0.9735	1	0.8335	1
6-phosphogluconate	-0.136062	-0.0291463	-0.340075	0.7228	0.6623	0.9647	1	0.0513	0.5061
ribulose 5-phosphate	-0.415037	-0.234465	-0.200913	0.2884	0.387	0.5739	1	0.5242	0.9577
ribose 5-phosphate	-0.200913	0.111031	-0.184425	0.6117	0.5986	0.7933	1	0.2109	0.8508
ribose 1-phosphate	0.389567	0.0703893	0.0976108	0.2808	0.3831	0.7328	1	0.8226	1
5-phosphoribosyl diphosphate (PRPP)	0.526069	0.0703893	-0.0439433	0.0643	0.1738	0.7644	1	0.8764	1
sedoheptulose-7-phosphate	-0.217591	-0.0144996	0.0285692	0.3017	0.3974	0.9623	1	0.7168	0.9963
ribose	-0.0740006	-0.0291463	0.0285692	0.4061	0.469	0.6483	1	0.7893	1
ribitol	-0.434403	-0.104697	0.454176	0.2304	0.3426	0.7745	1	0.1445	0.7763
ribonate	-0.152003	-0.0588937	-0.0291463	0.3539	0.4327	0.7408	1	0.8482	1
xylulose 5-phosphate	-0.0291463	-0.0588937	-0.120294	0.7767	0.686	0.9462	1	0.6469	0.9955
arabinose	-0.251539	0.0565835	-0.0740006	0.0252	0.1101	0.7074	1	0.5702	0.9955
arabitol/xylitol	-0.136062	0.0703893	-0.200913	0.2307	0.3426	0.7244	1	0.1153	0.7176
ribulose/xylulose	-0.395929	0.0426443	-0.0588937	0.1004	0.2102	0.9631	1	0.5096	0.9577
arabonate/xylonate	-0.152003	-0.0144996	-0.0144996	0.2386	0.3449	0.9672	1	0.925	1
sedoheptulose	-0.434403	-0.217591	0.0426443	0.0348	0.1274	0.4042	1	0.8719	1
ribulonate/xylulonate	-0.234465	0.0426443	0.189034	0.0983	0.207	0.7379	1	0.1982	0.8294
maltotetraose	0.321928	-0.535332	0.545968	0.215	0.3306	0.1809	1	0.4502	0.9577
maltotriose	-0.0740006	-0.0588937	0.545968	0.9067	0.7363	0.9226	1	0.1987	0.8294
maltose	-0.321928	-0.152003	0.176323	0.1809	0.2953	0.4165	1	0.7221	0.9963
fructose	-0.494109	-0.0588937	0	0.0673	0.1738	0.8254	1	0.9796	1
mannitol/sorbitol	-0.200913	-0.0291463	0.0565835	0.0682	0.1738	0.8126	1	0.6387	0.9955
mannose	-0.268817	-0.120294	-0.168123	0.2266	0.3421	0.5983	1	0.3475	0.9359
mannose-6-phosphate	-0.37707	-0.321928	-0.0588937	0.175	0.2884	0.2933	1	0.7187	0.9963
galactitol (dulcitol)	-0.268817	-0.168123	-0.0144996	0.082	0.1864	0.2676	1	0.7917	1
galactose 1-phosphate	-0.304006	-0.152003	0.0426443	0.1929	0.3134	0.6737	1	0.9766	1
UDP-glucose	0.378512	0.356144	-0.321928	0.3314	0.4163	0.2481	1	0.3149	0.9338
UDP-galactose	-0.0144996	0.238787	0.0976108	0.9791	0.7515	0.3205	1	0.7994	1
UDP-glucuronate	-0.200913	0.31034	-0.395929	0.4428	0.4952	0.1535	1	0.0388	0.4297
guanosine 5'-diphospho-fucose	-0.514573	0.31034	0.137504	0.0592	0.1716	0.3519	1	0.6983	0.9963
UDP-N-acetylglucosamine/galactosamine	-0.234465	0.0426443	0.0143553	0.0194	0.1045	0.6424	1	0.9255	1
cytidine 5'-monophospho-N-acetylneuraminic acid	-0.184425	-0.0740006	0.0426443	0.0591	0.1716	0.4988	1	0.7004	0.9963
glucosamine-6-phosphate	-0.514573	-0.184425	-0.217591	0.0937	0.2022	0.6058	1	0.3038	0.9286
glucuronate	-0.136062	-0.136062	0.0976108	0.4135	0.4735	0.4196	1	0.5274	0.9577
N-acetylglucosamine 6-phosphate	-0.184425	-0.152003	0.124328	0.2555	0.3567	0.352	1	0.3975	0.9577
N-acetyl-glucosamine 1-phosphate	-0.200913	-0.0740006	0.0703893	0.3121	0.4064	0.6853	1	0.6836	0.9963
N-acetylneuraminate	-0.136062	-0.0588937	0.0565835	0.0333	0.1274	0.2967	1	0.3558	0.9359
N-acetylglucosaminylasparagine	-0.168123	0.0426443	0.0565835	0.0712	0.1753	0.6179	1	0.4656	0.9577
erythronate	-0.251539	-0.0144996	0	0.0141	0.0831	0.9017	1	0.9309	1
N-acetylglucosamine/N-acetylgalactosamine	-0.184425	0.0565835	-0.0892673	0.035	0.1274	0.538	1	0.2779	0.8941
N6-carboxymethyllysine	0	0	0.15056	1	0.7515	0.8007	1	0.3948	0.9577
citrate	0.0976108	-0.0291463	0.0703893	0.2151	0.3306	0.7543	1	0.4294	0.9577
aconitate [cis or trans]	0.137504	-0.0144996	0.0426443	0.1316	0.2454	0.8493	1	0.7047	0.9963
isocitric lactone	-0.494109	-0.0144996	0.0703893	0.0511	0.1568	0.5094	1	0.8515	1
alpha-ketoglutarate	0.275007	-0.0740006	-0.0291463	0.2375	0.3449	0.7227	1	0.9107	1
succinylcarnitine (C4-DC)	-0.217591	0.0285692	0.31034	0.1226	0.2402	0.7539	1	0.0275	0.3744
succinate	0.0143553	0.0840643	0.0840643	0.8906	0.7354	0.8317	1	0.654	0.9955
fumarate	-0.251539	-0.0740006	0.0143553	0.0096	0.0741	0.4335	1	0.9474	1
malate	-0.251539	-0.0291463	-0.0144996	0.0006	0.0463	0.7079	1	0.9023	1
2-methylcitrate/homocitrate	-0.234465	0.0976108	0.0703893	0.0302	0.1196	0.2715	1	0.4875	0.9577
acetylphosphate	0.0840643	0.0285692	-0.217591	0.7477	0.673	0.9451	1	0.2203	0.8513
phosphate	0.0143553	-0.0144996	0.0285692	0.855	0.722	0.614	1	0.329	0.9359
malonylcarnitine	0	0.0840643	0.15056	0.8722	0.7293	0.412	1	0.2631	0.8797
malonate	-0.0291463	-0.0144996	0.124328	0.7904	0.6871	0.765	1	0.1838	0.8294
acetyl CoA	0	0.0565835	0.0143553	1	0.7515	0.5305	1	0.9935	1
caproate (6:0)	-0.120294	-0.0144996	-0.0144996	0.7651	0.6815	0.9445	1	0.8533	1
heptanoate (7:0)	-0.643856	0.978196	0.15056	0.3838	0.4559	0.0955	1	0.656	0.9955
caprylate (8:0)	-0.454032	-0.358454	2.14731	0.1988	0.3177	0.7737	1	0.0063	0.2198
caprate (10:0)	-0.184425	-0.0588937	0.226509	0.2201	0.3352	0.6768	1	0.3441	0.9359
glutarate (C5-DC)	-0.0892673	-0.104697	-0.0144996	0.705	0.6519	0.5125	1	0.8935	1
3-methylglutarate/2-methylglutarate	-0.304006	-0.104697	0.367371	0.3905	0.4578	0.9863	1	0.3889	0.9577
2-hydroxyglutarate	-0.0588937	-0.120294	0.0143553	0.6146	0.5986	0.2176	1	0.9593	1
adipate (C6-DC)	0.0143553	-0.268817	0.475085	0.8547	0.722	0.3485	1	0.0941	0.6674
2-hydroxyadipate	-1	-0.643856	0.214125	0.0727	0.177	0.0782	1	0.6257	0.9955
3-hydroxyadipate	-0.168123	-0.0588937	0.0976108	0.5572	0.5711	0.8646	1	0.7764	1
pimelate (C7-DC)	0.0143553	-0.0439433	-0.234465	0.9448	0.7462	0.7185	1	0.3232	0.9349
azelate (C9-DC)	0.0976108	0.238787	-0.234465	0.6158	0.5986	0.2775	1	0.139	0.7763
2-aminoheptanoate	0	-0.120294	-0.184425	0.9858	0.7515	0.5107	1	0.3935	0.9577
butyrylcarnitine (C4)	-0.0144996	0	-0.0439433	0.9697	0.7515	0.9367	1	0.6514	0.9955
propionylcarnitine (C3)	0.111031	-0.0892673	-0.0291463	0.4361	0.4901	0.5459	1	0.8355	1
methylmalonate (MMA)	-0.268817	-0.0439433	0.0565835	0.0388	0.1365	0.6005	1	0.7364	1
acetylcarnitine (C2)	-0.0588937	0.0143553	0.0976108	0.6134	0.5986	0.9934	1	0.4985	0.9577
3-hydroxybutyrylcarnitine (1)	0.0426443	0.0703893	0.286881	0.6709	0.6357	0.7385	1	0.024	0.3744
3-hydroxybutyrylcarnitine (2)	-0.0291463	0.124328	0.321928	0.8985	0.7354	0.5454	1	0.0248	0.3744
hexanoylcarnitine (C6)	0.286881	-0.184425	-0.120294	0.3884	0.4569	0.6143	1	0.61	0.9955
laurylcarnitine (C12)	0.124328	-0.0439433	0.411426	0.3838	0.4559	0.8138	1	0.0211	0.3744
myristoylcarnitine (C14)	0.0565835	0	0.411426	0.5656	0.5777	0.744	1	0.0011	0.1159
palmitoylcarnitine (C16)	-0.0291463	0.0143553	0.275007	0.6981	0.649	0.8747	1	0.0029	0.1289
palmitoleoylcarnitine (C16:1)	0.0565835	-0.0291463	0.443607	0.7143	0.6587	0.9917	1	0.002	0.1185
stearoylcarnitine (C18)	-0.120294	0.0840643	0.286881	0.3066	0.4023	0.5517	1	0.0348	0.4166
linoleoylcarnitine (C18:2)	0.0976108	0.124328	0.344828	0.4548	0.502	0.2978	1	0.0078	0.2499
oleoylcarnitine (C18:1)	0.0285692	0	0.356144	0.76	0.6788	0.9133	1	0.0018	0.1185
myristoleoylcarnitine (C14:1)	0.137504	0	0.641546	0.5894	0.5851	0.9096	1	0.0088	0.2499
arachidoylcarnitine (C20)	-0.0892673	0.0840643	0.432959	0.5453	0.5657	0.5048	1	0.0113	0.3029
arachidonoylcarnitine (C20:4)	-0.304006	0.124328	0.275007	0.0672	0.1738	0.5487	1	0.146	0.7763
adrenoylcarnitine (C22:4)	-0.217591	0.31034	0.378512	0.3262	0.4162	0.3741	1	0.1223	0.7401
behenoylcarnitine (C22)	-0.395929	0.0285692	0	0.049	0.1564	0.8003	1	0.9425	1
dihomo-linolenoylcarnitine (20:3n3 or 6)	-0.184425	0.111031	0.443607	0.327	0.4162	0.7027	1	0.0159	0.3549
dihomo-linoleoylcarnitine (C20:2)	-0.200913	0.0565835	0.400538	0.264	0.3662	0.807	1	0.0254	0.3744
eicosenoylcarnitine (C20:1)	-0.104697	0.124328	0.411426	0.4329	0.4897	0.4253	1	0.0054	0.2054
docosahexaenoylcarnitine (C22:6)	-0.0588937	0.0840643	0.31034	0.7335	0.6655	0.6409	1	0.1274	0.7427
lignoceroylcarnitine (C24)	-0.286304	0.124328	0.250962	0.0683	0.1738	0.497	1	0.2769	0.8941
deoxycarnitine	-0.200913	-0.0144996	0.422233	0.1258	0.2403	0.9112	1	0.0025	0.1241
carnitine	-0.152003	0.0426443	0.15056	0.0632	0.1738	0.5765	1	0.0903	0.6674
3-hydroxybutyrate (BHBA)	-0.0439433	-0.0291463	0.189034	0.8525	0.722	0.8417	1	0.2402	0.8797
acetylcholine	-0.152003	-0.136062	0.367371	0.4136	0.4735	0.5553	1	0.3066	0.9286
palmitoylcholine	0.0976108	0	0.333424	0.3863	0.456	0.833	1	0.0195	0.3744
oleoylcholine	-0.136062	-0.104697	0.124328	0.4925	0.5301	0.7754	1	0.435	0.9577
2-hydroxyheptanoate	-0.120294	-0.0144996	-0.0439433	0.7241	0.6623	0.899	1	0.7811	1
2-hydroxyoctanoate	-0.304006	0.0565835	0.411426	0.2183	0.334	0.8549	1	0.1015	0.6875
2-hydroxydecanoate	-0.0291463	0.124328	0.0285692	0.791	0.6871	0.522	1	0.7216	0.9963
2-hydroxylignocerate	0.111031	-0.0588937	0.238787	0.4442	0.4952	0.501	1	0.0658	0.5858
2-hydroxynervonate	0.0426443	0.0426443	0.111031	0.906	0.7363	0.8294	1	0.1706	0.8269
2-hydroxypalmitate	-0.0144996	-0.0144996	-0.0588937	0.9011	0.7354	0.9565	1	0.7836	1
2-hydroxybehenate	-0.0144996	0.0976108	0.0703893	0.8983	0.7354	0.6794	1	0.3865	0.9577
3-hydroxyhexanoate	-0.321928	0.584963	0.0565835	0.5239	0.5534	0.0502	1	0.8777	1
3-hydroxypalmitate	-0.0588937	-0.0144996	0.389567	0.9086	0.7363	0.8181	1	0.0696	0.5961
13-HODE + 9-HODE	-0.184425	-0.0588937	0.0565835	0.6538	0.6248	0.78	1	0.9757	1
prostaglandin F2alpha	-0.152003	0.0976108	-0.217591	0.1657	0.278	0.3421	1	0.0797	0.6348
5-HETE	-0.200913	-0.0892673	-0.0291463	0.7496	0.673	0.6968	1	0.9549	1
12-HETE	-0.454032	-0.0588937	0.0840643	0.147	0.2613	0.7043	1	0.4827	0.9577
15-HETE	-0.200913	-0.0439433	0.163499	0.3167	0.4092	0.7706	1	0.2691	0.8872
5-KETE	-0.217591	-0.0740006	-0.268817	0.6361	0.6113	0.7467	1	0.4102	0.9577
15-KETE	0	-0.0588937	0.124328	0.669	0.6357	0.7544	1	0.6547	0.9955
oleoyl ethanolamide	-0.321928	0.137504	0.176323	0.2465	0.3518	0.6519	1	0.0691	0.5961
palmitoyl ethanolamide	-0.251539	0.0565835	0.214125	0.369	0.4465	0.867	1	0.0525	0.5075
stearoyl ethanolamide	-0.0740006	0.0143553	0.137504	0.5332	0.5567	0.8515	1	0.2085	0.8508
arachidonoyl ethanolamide	0.0143553	-0.0740006	0	0.8893	0.7354	0.343	1	0.9152	1
N-arachidonoyltaurine	-0.643856	-0.0144996	0.669027	0.0443	0.1481	0.9334	1	0.0456	0.4815
linoleoyl ethanolamide	-0.340075	0.176323	0.333424	0.4232	0.4828	0.715	1	0.0767	0.6348
palmitoleoyl ethanolamide	-0.217591	0.0143553	0.176323	0.3751	0.4506	0.8768	1	0.3953	0.9577
N-stearoylserine	0	0.176323	-0.268817	0.8684	0.7279	0.4213	1	0.7926	1
N-palmitoylserine	-0.217591	0.0565835	0.495695	0.7194	0.6615	0.5667	1	0.1488	0.7763
myo-inositol	-0.234465	-0.0892673	0.0703893	0.0072	0.0666	0.3222	1	0.4384	0.9577
chiro-inositol	-0.136062	-0.0588937	0.0703893	0.5336	0.5567	0.7976	1	0.6355	0.9955
inositol 1-phosphate (I1P)	0	0.226509	0.0143553	1	0.7515	0.7342	1	0.7449	1
choline	-0.0291463	-0.0439433	0.0143553	0.8007	0.6934	0.633	1	0.7494	1
choline phosphate	-0.104697	0	0.0143553	0.0417	0.1422	0.9307	1	0.869	1
cytidine 5'-diphosphocholine	-0.358454	0	0.0285692	0.0012	0.0463	0.9899	1	0.836	1
glycerophosphorylcholine (GPC)	-0.0892673	0.0426443	-0.0892673	0.7915	0.6871	0.8713	1	0.4516	0.9577
phosphoethanolamine	-0.152003	0	0.0703893	0.0344	0.1274	0.925	1	0.3304	0.9359
cytidine-5'-diphosphoethanolamine	-0.251539	-0.0144996	0.0565835	0.0106	0.0759	0.8856	1	0.5081	0.9577
glycerophosphoethanolamine	-0.0144996	-0.0144996	-0.0291463	0.8492	0.722	0.8497	1	0.6809	0.9963
glycerophosphoserine	-0.286304	0.0426443	-0.0740006	0.021	0.1058	0.6443	1	0.4816	0.9577
glycerophosphoinositol	-0.251539	0.0426443	0.0703893	0.0058	0.0655	0.6171	1	0.4624	0.9577
trimethylamine N-oxide	0.250962	0.163499	-0.0892673	0.2543	0.3567	0.6942	1	0.9588	1
glycerol	-0.0144996	0.0565835	-0.0740006	0.9471	0.7462	0.6334	1	0.5245	0.9577
glycerol 3-phosphate	-0.184425	-0.0588937	0.111031	0.5146	0.5452	0.7392	1	0.5527	0.9879
glycerophosphoglycerol	-0.200913	0	0.0285692	0.0011	0.0463	0.9911	1	0.7673	1
1-palmitoylglycerol (16:0)	-0.915936	0.189034	0.669027	0.3605	0.4377	0.7304	1	0.201	0.8294
1-oleoylglycerol (18:1)	-0.862496	0.516015	0.321928	0.6888	0.6453	0.3285	1	0.2136	0.8508
1-arachidonylglycerol (20:4)	-0.0588937	-0.473931	0.31034	0.8778	0.7304	0.4933	1	0.1901	0.8294
1-docosahexaenoylglycerol (22:6)	-0.0291463	0.214125	0.124328	0.9164	0.7371	0.6894	1	0.4908	0.9577
2-palmitoylglycerol (16:0)	-0.268817	0.31034	0.650765	0.8199	0.7046	0.5588	1	0.1087	0.7176
2-oleoylglycerol (18:1)	-0.643856	0.15056	0.475085	0.2084	0.3247	0.7864	1	0.0979	0.6817
2-arachidonoylglycerol (20:4)	-0.0439433	0.422233	0.454176	0.6681	0.6357	0.2676	1	0.0991	0.6817
2-docosahexaenoylglycerol (22:6)	-0.494109	0.0840643	-0.217591	0.1171	0.2323	0.8348	1	0.8394	1
sphinganine	-0.0588937	-0.0291463	0.189034	0.4613	0.5034	0.8232	1	0.0482	0.4867
sphingosine	-0.0588937	0.0143553	0.111031	0.4069	0.469	0.8245	1	0.1557	0.7855
sphingosine 1-phosphate	-0.217591	0	0.516015	0.2316	0.3426	0.9157	1	0.0085	0.2499
phytosphingosine	0.275007	0.0840643	-0.0144996	0.0876	0.1965	0.5552	1	0.9941	1
sphingadienine	-0.152003	0.0426443	0.0565835	0.1131	0.2287	0.6866	1	0.5754	0.9955
eicosanoylsphingosine (d20:1)	-0.184425	0.0143553	-0.0291463	0.0329	0.1274	0.8558	1	0.5747	0.9955
3-hydroxy-3-methylglutarate	-0.251539	0	0.0976108	0.027	0.1136	0.9964	1	0.3475	0.9359
desmosterol	-0.0439433	-0.0588937	0.137504	0.6904	0.6453	0.6558	1	0.1858	0.8294
cholesterol	-0.152003	0.0285692	0.137504	0.0598	0.1716	0.774	1	0.1248	0.7427
4-cholesten-3-one	0.214125	0.0143553	-0.0740006	0.1993	0.3177	0.9708	1	0.5803	0.9955
beta-sitosterol	0	0.176323	0.575312	1	0.7515	0.4658	1	0.154	0.7854
campesterol	-0.0291463	-1.55639	0.464668	0.9138	0.7371	8.9887e-06	0.0041	0.1755	0.8294
7-hydroxycholesterol (alpha or beta)	0.238787	0	-0.0740006	0.1236	0.2402	0.989	1	0.7389	1
corticosterone	1.59455	1.22033	0.0703893	0.0092	0.0728	0.0254	1	0.9152	1
cholate	0	0.226509	0.226509	1	0.7515	0.5173	1	0.6934	0.9963
AICA ribonucleotide	-0.136062	-0.104697	0.163499	0.5883	0.5851	0.4332	1	0.4536	0.9577
inosine 5'-monophosphate (IMP)	-0.268817	1.24489	0	0.6975	0.649	0.0088	1	1	1
inosine	-0.0588937	0.0565835	0	0.5693	0.5777	0.5367	1	0.8605	1
hypoxanthine	-0.268817	-0.0439433	0	0.0242	0.1101	0.7051	1	0.8781	1
xanthine	-0.136062	0.0285692	0.0703893	0.0743	0.1772	0.6956	1	0.4104	0.9577
xanthosine	0.0565835	-0.0291463	-0.0439433	0.7756	0.686	0.7806	1	0.8001	1
N1-methylinosine	0.0285692	-0.268817	0	0.991	0.7515	0.0639	1	1	1
2'-deoxyinosine	-0.136062	-0.0144996	-0.0291463	0.3471	0.4275	0.9329	1	0.9122	1
urate	0.201634	-0.0588937	-0.0291463	0.2818	0.3831	0.9211	1	0.9026	1
allantoin	-0.152003	-0.0740006	-0.0892673	0.3254	0.4162	0.6982	1	0.4645	0.9577
adenosine 5'-monophosphate (AMP)	-0.358454	0.0703893	0.111031	0.1334	0.246	0.6946	1	0.5779	0.9955
adenosine 3'-monophosphate (3'-AMP)	-0.152003	-0.104697	-0.0892673	0.2976	0.3951	0.4507	1	0.5678	0.9955
adenosine 2'-monophosphate (2'-AMP)	0.0840643	-0.0588937	-0.0291463	0.5089	0.5425	0.8219	1	0.9436	1
adenosine 3',5'-diphosphate	0.0285692	-0.251539	0.250962	0.8997	0.7354	0.2522	1	0.1417	0.7763
adenylosuccinate	0	0	0	1	0.7515	1	1	1	1
adenosine	0.189034	0.0840643	0.555816	0.6069	0.5967	0.7749	1	0.1475	0.7763
adenine	-0.473931	-0.0291463	0.0285692	0.0003	0.0463	0.7888	1	0.7724	1
N1-methyladenosine	-0.358454	0	0.0840643	0.0136	0.0831	0.9936	1	0.5879	0.9955
N6-methyladenosine	-0.251539	0.0565835	0.0703893	0.2356	0.3435	0.6997	1	0.6164	0.9955
N6-carbamoylthreonyladenosine	-0.0892673	-0.0291463	0	0.5784	0.5821	0.8794	1	0.9434	1
N6-succinyladenosine	-0.168123	-0.0588937	-0.0740006	0.2053	0.3217	0.6468	1	0.8026	1
guanosine 5'- diphosphate (GDP)	-0.268817	0.298658	-0.304006	0.2343	0.3434	0.1361	1	0.2537	0.8797
guanosine 5'- monophosphate (5'-GMP)	-0.358454	0.356144	0.0703893	0.0775	0.1813	0.0641	1	0.5731	0.9955
guanosine	-0.184425	0.0976108	0.163499	0.2549	0.3567	0.4203	1	0.2347	0.8734
guanine	-0.0439433	0	0.124328	0.7042	0.6519	0.9467	1	0.3796	0.9577
7-methylguanine	-0.104697	-0.0291463	0.0565835	0.4482	0.4981	0.8668	1	0.7702	1
N2,N2-dimethylguanosine	-0.0892673	-0.104697	-0.104697	0.5575	0.5711	0.6233	1	0.3484	0.9359
orotate	-0.136062	0.0976108	0.111031	0.2737	0.3781	0.5513	1	0.4535	0.9577
orotidine	-0.286304	0.0426443	0.189034	0.0691	0.1745	0.7473	1	0.2225	0.8513
uridine 5'-monophosphate (UMP)	-0.358454	0.739848	0	0.2128	0.33	0.0012	0.2718	1	1
uridine-2',3'-cyclic monophosphate	-0.454032	-0.0144996	0.163499	0.4003	0.4661	0.8773	1	0.435	0.9577
uridine	-0.168123	0	-0.0740006	0.1133	0.2287	0.9572	1	0.4693	0.9577
uracil	-0.268817	-0.0439433	0.0703893	0.062	0.1738	0.7785	1	0.6733	0.9963
pseudouridine	-0.152003	0.0143553	0.0285692	0.1161	0.2317	0.7941	1	0.6127	0.9955
5,6-dihydrouridine	-0.104697	0.163499	0.0565835	0.6422	0.6155	0.1985	1	0.7499	1
5-methyluridine (ribothymidine)	-0.286304	0.0703893	0	0.0423	0.1429	0.6336	1	1	1
2'-deoxyuridine	-0.104697	-0.0892673	0.0143553	0.2893	0.387	0.41	1	0.9893	1
3-ureidopropionate	0.15056	0.0840643	0.15056	0.619	0.5999	0.7206	1	0.5946	0.9955
cytidine 5'-monophosphate (5'-CMP)	-0.120294	0.111031	0.137504	0.1438	0.2569	0.1692	1	0.1144	0.7176
cytidine 2',3'-cyclic monophosphate	-0.217591	0	0.422233	0.474	0.5134	0.9416	1	0.0361	0.4166
cytidine	-0.136062	-0.0291463	0.0840643	0.0771	0.1813	0.6676	1	0.3009	0.9286
cytosine	0.226509	0	0.475085	0.2345	0.3434	0.9677	1	0.1288	0.7427
3-methylcytidine	-0.136062	-0.120294	0.0703893	0.15	0.2643	0.2177	1	0.5129	0.9577
5-methylcytidine	-0.136062	0.0703893	0.0840643	0.2561	0.3567	0.5125	1	0.4738	0.9577
N4-acetylcytidine	0.669027	0	0	0.0023	0.0463	0.9861	1	1	1
2'-deoxycytidine 5'-monophosphate	-0.268817	0.0285692	0.111031	0.0207	0.1058	0.8358	1	0.3626	0.9359
2'-deoxycytidine	-0.200913	0.0703893	0.0976108	0.0353	0.1274	0.4508	1	0.3098	0.9311
2'-O-methylcytidine	-0.621488	0.201634	-0.120294	0.0576	0.1716	0.5634	1	0.6191	0.9955
5-methyl-2'-deoxycytidine	-0.120294	0.0840643	0.411426	0.4335	0.4897	0.4311	1	0.0021	0.1185
thymidine	-0.120294	0	-0.0291463	0.152	0.266	0.8388	1	0.7083	0.9963
3-aminoisobutyrate	0	-0.184425	0.475085	0.9284	0.7383	0.7249	1	0.2312	0.8716
methylphosphate	-0.535332	-0.0144996	0.226509	0.0045	0.0534	0.9889	1	0.2501	0.8797
nicotinamide	-0.152003	0	0.0976108	0.0505	0.1565	0.9999	1	0.2437	0.8797
nicotinamide riboside	-0.434403	0.0426443	0.238787	0.1503	0.2643	0.6855	1	0.4288	0.9577
nicotinamide adenine dinucleotide (NAD+)	-0.217591	-0.0439433	0.0703893	0.0232	0.1101	0.7082	1	0.5237	0.9577
1-methylnicotinamide	-0.358454	0.0143553	-0.0439433	0.0036	0.0473	0.8663	1	0.6499	0.9955
trigonelline (N'-methylnicotinate)	-0.200913	0.0703893	0.163499	0.2009	0.3188	0.5675	1	0.341	0.9359
N1-Methyl-2-pyridone-5-carboxamide	0.0143553	0	0	0.9925	0.7515	0.3095	1	0.9348	1
N1-Methyl-4-pyridone-3-carboxamide	0.286881	-0.234465	0.918386	0.8765	0.7304	0.9369	1	0.6329	0.9955
riboflavin (Vitamin B2)	-0.0740006	-0.0439433	-0.0144996	0.4689	0.5094	0.7808	1	0.9692	1
flavin adenine dinucleotide (FAD)	-0.120294	0	0.0143553	0.1945	0.3145	0.9826	1	0.8753	1
flavin mononucleotide (FMN)	-0.200913	-0.0588937	-0.0588937	0.1598	0.2739	0.6971	1	0.8454	1
pantothenate	-0.217591	0	0.137504	0.0652	0.1738	0.9951	1	0.2838	0.9009
phosphopantetheine	-0.494109	-0.0740006	0.137504	0.0022	0.0463	0.6722	1	0.3257	0.9358
3'-dephosphocoenzyme A	-0.415037	0.0565835	0.0703893	0.0075	0.0666	0.7281	1	0.6821	0.9963
3'-dephospho-acetyl-CoA	-0.358454	-0.168123	-0.120294	0.1436	0.2569	0.6308	1	0.5205	0.9577
coenzyme A	-0.286304	0.176323	0.344828	0.028	0.1152	0.2582	1	0.0249	0.3744
pantetheine	-0.535332	-0.0740006	0.0426443	0.0069	0.0666	0.8495	1	0.7952	1
ascorbate (Vitamin C)	-1.05889	0.0840643	0.286881	0.0005	0.0463	0.8831	1	0.5979	0.9955
dehydroascorbate	-0.152003	-0.0144996	0	0.0939	0.2022	0.8584	1	0.9073	1
threonate	-0.136062	-0.0439433	0.0840643	0.7872	0.6871	0.7817	1	0.6622	0.9955
oxalate (ethanedioate)	-0.184425	-0.0291463	0.111031	0.4562	0.502	0.8646	1	0.484	0.9577
gulonate	-0.321928	-0.104697	0.0426443	0.0136	0.0831	0.445	1	0.8269	1
alpha-tocopherol	-0.599462	0.137504	0.0976108	0.0126	0.0809	0.7218	1	0.8134	1
gamma-tocopherol/beta-tocopherol	-0.473931	0	0.15056	0.048	0.156	0.9805	1	0.626	0.9955
5-methyltetrahydrofolate (5MeTHF)	-0.415037	-0.0291463	-0.120294	0.0169	0.0959	0.9248	1	0.5797	0.9955
heme	-0.971431	-0.120294	-0.184425	0.3416	0.4253	0.8091	1	0.612	0.9955
thiamin (Vitamin B1)	-0.535332	0.0976108	0.137504	0.0067	0.0666	0.6203	1	0.5024	0.9577
thiamin monophosphate	-0.136062	0.0565835	0.0976108	0.1576	0.2729	0.5522	1	0.3575	0.9359
pyridoxamine	-0.234465	-0.0144996	0.0565835	0.0502	0.1565	0.9116	1	0.634	0.9955
pyridoxamine phosphate	-0.37707	0.0143553	0.124328	0.0012	0.0463	0.8958	1	0.2773	0.8941
pyridoxal	-0.358454	0.0703893	0.0976108	0.0088	0.0712	0.6408	1	0.4576	0.9577
pyridoxate	-0.0144996	-0.136062	-0.0439433	0.8512	0.722	0.5992	1	0.8842	1
Figure 5d
PN17
Amino Acids	23
Peptides	8
Carbohydrates	2
Energy	2
Lipids	5
Nucleotides	3
Cofactors and Vitamins	11
Total	54
Metabolite	Log2 (Fold change)
creatine	-0.0892673
glutamate	-0.136062
taurine	-0.136062
N-acetylaspartate (NAA)	-0.152003
N-acetyl-aspartyl-glutamate (NAAG)	-0.184425
serine	-0.200913
proline	-0.200913
gamma-aminobutyrate (GABA)	-0.200913
glycerophosphoglycerol	-0.200913
histidine	-0.217591
lysine	-0.217591
glutamine	-0.217591
myo-inositol	-0.234465
erythronate	-0.251539
cytidine-5'-diphosphoethanolamine	-0.251539
fumarate	-0.251539
glycerophosphoinositol	-0.251539
malate	-0.251539
tryptophan	-0.268817
alanine	-0.268817
valine	-0.286304
lactate	-0.286304
gulonate	-0.321928
S-adenosylmethionine (SAM)	-0.321928
asparagine	-0.340075
N1-methyladenosine	-0.358454
pyridoxal	-0.358454
glycylglutamate	-0.358454
gamma-glutamylglutamine	-0.358454
1-methylnicotinamide	-0.358454
cytidine 5'-diphosphocholine	-0.358454
serylglutamate	-0.37707
argininosuccinate	-0.37707
serylglycine	-0.37707
5-oxoproline	-0.37707
pyridoxamine phosphate	-0.37707
5-methyltetrahydrofolate (5MeTHF)	-0.415038
3'-dephosphocoenzyme A	-0.415038
spermidine	-0.434403
glycylserine	-0.454032
asparaginylalanine	-0.473931
prolylalanine	-0.473931
adenine	-0.473931
phosphopantetheine	-0.494109
o-Tyrosine	-0.514573
pantetheine	-0.535332
thiamin (Vitamin B1)	-0.535332
methylphosphate	-0.535332
alpha-tocopherol	-0.599462
cysteine	-0.621488
histidylglutamate	-0.643856
glutathione, oxidized (GSSG)	-0.68966
ascorbate (Vitamin C)	-1.05889
S-lactoylglutathione	-1.18443
Figure 5e
PN80
Amino Acids	2
Peptides	1
Carbohydrates	2
Energy	0
Lipids	5
Nucleotides	1
Cofactors and Vitamins	0
Total	11
Metabolite	Log2 (Fold change)
1-methyl-4-imidazoleacetate	0.604071
imidazole propionate	0.604071
gamma-glutamylhistidine	0.555816
palmitoleoylcarnitine (C16:1)	0.443607
deoxycarnitine	0.422233
myristoylcarnitine (C14)	0.411426
5-methyl-2'-deoxycytidine	0.411426
oleoylcarnitine (C18:1)	0.356144
palmitoylcarnitine (C16)	0.275007
3-phosphoglycerate	-0.217591
phosphoenolpyruvate (PEP)	-0.234465
