# Supplementary material for: Metabolomic profiling reveals a differential role for hippocampal glutathione reductase in infantile memory formation
Source: eLife. 2021 Nov 26;10:e68590. doi: 10.7554/eLife.68590 (PMC8626085; doi:10.7554/eLife.68590)
Supplement: Figure 6—source data 1. [file elife-68590-fig6-data1.xlsx]

## Sheet: Figure 6-Source Data 1
Figure 6-Source Data 1
Figure 6b
GSH	PN17	PN24	PN80		GSSG	PN17	PN24	PN80		GSH/GSSG	PN17	PN24	PN80		Glutamate	PN17	PN24	PN80		Cysteine	PN17	PN24	PN80		Glycine	PN17	PN24	PN80
	138.775	183.768	94.964			216.759	141.22	96.4354			64.7942	131.697	99.6605			82.1096	119.56	103.5			46.4036	77.1411	106.196			49.5143	100.174	111.964
	111.51	165.098	109.468			113.01	116.778	101.971			99.861	143.08	108.646			91.8023	116.763	96.7514			20.6778	78.1348	103.629			50.6767	95.3226	93.9417
	106.245	253.747	71.1723			130.436	168.525	94.1466			82.4349	152.383	76.508			90.521	125.047	98.1598			24.6596	108.292	86.0766			54.2778	110.33	95.8383
	102.15	178.623	71.1484			76.4436	132.395	79.882			135.238	136.542	90.1398			96.1939	126.485	97.4556			16.7323	84.8872	72.8112			47.7487	97.4116	89.7463
	108.095	208.061	82.3579			146.766	157.241	104.313			74.5387	133.914	79.9039			91.5187	130.29	91.2937			29.1999	100.459	78.9181			55.8685	110.094	84.6594
	122.11	161.982	120.105			122.24	159.423	101.183			101.098	102.829	120.13			101.603	127.189	101.945			23.7748	75.2119	101.634			57.2408	86.9057	107.472
	123.614	187.875	150.785			161.265	129.521	122.069			77.5764	146.801	125.012			99.8519	111.442	110.894			27.3432	72.2455	150.736			59.6793	77.3349	116.378
MEAN	116.071	191.308	100		MEAN	138.131	143.586	100		MEAN	90.7916	135.321	100		MEAN	93.3714	122.397	100		MEAN	26.9702	85.1959	100		MEAN	53.5723	96.796	100
SEM	4.83932	11.9082	10.9902		SEM	16.5761	7.08209	4.78747		SEM	8.92894	6.0856	7.16911		SEM	2.48119	2.5298	2.34488		SEM	3.59473	5.22955	9.76615		SEM	1.6568	4.50003	4.52957
n	7	7	7		n	7	7	7		n	7	7	7		n	7	7	7		n	7	7	7		n	7	7	7
Figure 6c
Glutathione reductase	PN17	PN24	PN80			Glutathione peroxidase		PN17	PN24	PN80		Glutamate-cysteine ligase		PN17	PN24	PN80		Glutamate-cysteine ligase		PN17	PN24	PN80		Glutathione synthetase		PN17	PN24	PN80
	78.0902	82.1452	98.531					225.077	153.99	97.5619		Catalytic subunit		95.934	108.589	108.153		Regulatory subunit		48.2837	147.826	98.8496				44.2037	51.794	109.547
	65.3416	73.8713	94.4049					169.783	133.568	92.1063				76.3126	81.3289	87.5259				35.4864	173.385	102.833				43.4554	49.4089	101.16
	74.1975	86.4175	112.237					196.099	152.402	106.793				83.5763	81.5756	95.9686				54.1975	186.284	112.237				44.0917	45.5921	95.9812
	77.4894	95.8658	94.8276					188.151	180.91	103.539				85.6894	94.476	108.352				37.3847	155.735	94.509				45.1891	45.0165	93.3119
	74.1732							174.885						76.8454						24.9937	190.103	91.5723				40.5152
	92.2535							223.762						87.2591						19.3934						43.6566
MEAN	76.9242	84.5749	100				MEAN	196.293	155.218	100			MEAN	84.2695	91.4924	100			MEAN	36.6232	170.666	100			MEAN	43.5186	47.9529	100
SEM	3.5862	4.57667	4.18279				SEM	9.67892	9.73921	3.25223			SEM	2.97726	6.47328	5.06697			SEM	5.41235	8.28752	3.60734			SEM	0.64889	1.60908	3.5751
n	6	4	4				n	6	4	4			n	6	4	4			n	6	5	5			n	6	4	4
Figure 6d
GR activity	PN17	PN24	PN80		GPx activity	PN17	PN24	PN80		GCL activity	PN17	PN24	PN80		GSy activity	PN17	PN24	PN80
	149.262	135.356	58.9036			210.843	179.909	100.804			54.8744	148.24	81.9827			48.0987	86.7934	134.738
	169.72	154.393	100.385			243.076	203.997	76.649			45.2681	190.745	114.552			35.3032	73.8438	80.4728
	215.9	184.775	94.1381			202.286	222.44	113.326			64.0202	121.855	143.305			25.591	80.3186	103.443
	207.42	191.253	117.288			162.377	229.817	131.385			31.6482	165.084	100.537			37.9239	92.9599	72.3022
	188.24	166.71	124.32			191.386	195.07	92.1895			48.1632	198.509	68.6917			49.0236	67.369	129.959
	171.125	175.017	104.965			222.069	164.574	85.6473			19.2784	211.471	90.931			80.7811	120.709	79.0853
MEAN	183.611	167.917	100		Mean	205.339	199.301	100		Mean	43.8754	172.651	100		Mean	46.1202	86.999	100
SEM	10.2626	8.41379	9.37805		SEM	11.231	10.1467	8.1148		SEM	6.58693	13.8279	10.7618		SEM	7.78751	7.69193	11.1086
n	6	6	6		n	6	6	6		n	6	6	6		n	6	6	6
