# Supplementary material for: Metabolomic profiling reveals a differential role for hippocampal glutathione reductase in infantile memory formation
Source: eLife. 2021 Nov 26;10:e68590. doi: 10.7554/eLife.68590 (PMC8626085; doi:10.7554/eLife.68590)
Supplement: Figure 7—source data 1. [file elife-68590-fig7-data1.xlsx]

## Sheet: Figure 7-Source Data 1
Figure 7-Source Data 1
Figure 7a
GSH	PN17				PN24				PN80
	Naive	Trained			Naive	Trained			Naive	Trained
	119.56	70.4505			96.059	84.2216			94.964	74.67
	96.0698	90.1046			86.2996	92.5084			109.468	101.398
	91.5342	68.9283			132.638	98.8171			71.1723	152.921
	88.0065	100.842			93.3695	92.602			71.1484	116.392
	93.1283	62.7575			108.757	94.3243			82.3579	175.913
	105.203	96.9748			84.6709	122.161			120.105	118.648
	106.499	112.793			98.2055	117.718			150.785	133.284
MEAN	100	86.1215		MEAN	100	100.336		MEAN	100	124.747
SEM	4.16926	7.15271		SEM	6.22462	5.34004		SEM	10.9902	12.5779
n	7	7		n	7	7		n	7	7
GSSG	PN17				PN24				PN80
	Naive	Trained			Naive	Trained			Naive	Trained
	156.922	52.459			98.352	88.6621			96.4354	78.7429
	81.8135	71.8565			81.3298	98.1593			101.971	108.592
	94.4292	40.7295			117.369	110.518			94.1466	117.076
	55.3412	60.6588			92.2059	94.7044			79.882	112.765
	106.251	38.7103			109.51	98.4039			104.313	117.683
	88.4951	66.5158			111.03	101.488			101.183	119.791
	116.748	74.5153			90.2042	102.86			122.069	125.167
MEAN	100	57.9208		MEAN	100	99.2565		MEAN	100	111.403
SEM	12.0002	5.44533		SEM	4.93228	2.58051		SEM	4.78747	5.78971
n	7	7		n	7	7		n	7	7
GSH/GSSG	PN17				PN24				PN80
	Naive	Trained			Naive	Trained			Naive	Trained
	71.3658	125.792			97.3218	94.6545			99.6606	95.9699
	109.989	117.454			105.734	93.9086			108.646	94.5002
	90.7957	158.518			112.609	89.0951			76.5079	132.19
	148.955	155.717			100.902	97.4329			90.1398	104.46
	82.0987	151.854			98.9604	95.5139			79.9039	151.281
	111.351	136.56			75.989	119.942			120.13	100.239
	85.4444	141.783			108.484	114.039			125.012	107.768
MEAN	100	141.097		MEAN	100	100.655		MEAN	100	112.344
SEM	9.83453	5.87003		SEM	4.49716	4.37282		SEM	7.16912	8.05648
n	7	7		n	7	7		n	7	7
Figure 7b
Glutathione reductase		PN17-N	Tr-1h	Tr-24h		Glutathione peroxidase		PN17-N	Tr-1h	Tr-24h		Glutamate-cysteine ligase		PN17-N	Tr-1h	Tr-24h		Glutamate-cysteine ligase		PN17-N	Tr-1h	Tr-24h		Glutathione synthetase		PN17-N	Tr-1h	Tr-24h
		111.445	114.447	116.284				95.2512	115.853	115.24		Catalytic subunit		141.256	104.878	95.969		Regulatory subunit		86.6373	114.284	117.375				106.17	105.098	98.7404
		89.2927	100.143	107.855				107.295	97.0597	97.7871				96.8517	104.095	105.744				109.495	94.8476	91.7774				93.0312	113.957	105.219
		99.2625	99.6655	93.8999				97.4541	95.1	87.9988				89.313	76.6987	88.5407				97.4935	99.4775	97.5528				100.799	110.574	100.621
		85.6406	91.1471	97.7627				102.667	87.5561	104.374				93.1488	97.114	90.5171				108.375	93.8393	107.358				93.4494	91.833	115.879
		93.2677	107.235	126.549				92.0885	108.995	112.014				94.9054	78.7425	65.0665				91.8836	109.374	100.826				89.6548	103.035	119.109
		121.092	116.308	95.6887				105.245	114.157					84.5251	144.607					106.117	115.664					116.896	122.91
	MEAN	100	104.824	106.34			MEAN	100	103.12	103.483			MEAN	100	101.022	89.1675			MEAN	100	104.581	102.978			MEAN	100	107.901	107.914
	SEM	5.60523	3.94072	5.32714			SEM	2.44579	4.69658	4.91932			SEM	8.44304	10.0453	6.72353			SEM	3.86615	3.98382	4.39303			SEM	4.17402	4.31594	4.08278
	n	6	6	6			n	6	6	5			n	6	6	5			n	6	6	5			n	6	6	5
Figure 7c
GR activity	PN17-N	Tr-15 min	Tr-1h	Tr-24h	Tr-7d	PN24-N		GPx activity	PN17-N	Tr-15 min	Tr-1h	Tr-24h		GCL activity	PN17-N	Tr-15 min	Tr-1h	Tr-24h		GSy activity	PN17-N	Tr-15 min	Tr-1h	Tr-24h
	81.2923	144.252	96.5534	101.326	97.6446	46.9485			102.68	89.6814	111.425	97.9282			116.345	86.91	78.2609	101.558			104.29	109.304	142.061	137.382
	92.4344	154.705	119.586	112.638	62.6987	84.0868			118.378	84.6468	105.349	108.593			95.9777	120.809	130.016	88.305			76.546	137.382	123.008	72.8691
	117.585	147.781	138.697	133.604	87.0089	100.634			98.5132	118.336	88.3439	99.6506			135.736	58.7305	103.79	76.3078			55.4875	68.8579	71.532	94.9304
	112.967	168.882	113.72	128.251	91.5656	49.0078			79.0772	111.186	86.8042	85.0578			67.1007	77.8424	84.957	87.0495			82.2284	91.5877	135.376	115.989
	102.521	141.026	158.425	140.887	57.2208	75.8408			93.2045	89.5096	121.816	106.055			102.116	132.109	107.835	113.276			106.295	106.63	95.9331	102.618
	93.1996	148.604	126.978	130.283	66.234	64.4828			108.147	97.7433	95.1945	125.554			82.7249	107.277	120.809	137.828			175.153	84.9025	103.955	83.2312
MEAN	100	150.875	125.66	124.498	77.0621	70.1668			100	98.5172	101.489	103.807			100	97.2797	104.278	100.721			100	99.7772	111.978	101.17
SEM	5.58931	4.06006	8.70233	5.99074	6.95261	8.5114			5.46947	5.49388	5.64169	5.49024			9.90902	11.3108	8.16256	9.0781			16.8852	9.65423	10.8502	9.47743
n	6	6	6	6	6	6			6	6	6	6			6	6	6	6			6	6	6	6
Figure 7d
GR activity	PN17-N	SO-15 min	Tr-15 min
	109.723	101.587	208.586
	119.396	90.9705	160.221
	70.5377	110.679	106.518
	91.239	123.709	185.052
	80.4749	145.576	175.104
	128.629	140.63	176.474
MEAN	100	118.858	168.659
SEM	9.3388	8.85873	14.0216
n	6	6	6
Figure 7e
GR activity	PN24-N	Tr-15 min	Tr-1h	Tr-24h
	123.498	72.4151	116.462	102.055
	96.7869	123.431	109.04	107.05
	90.1074	126.117	91.7043	103.125
	101.584	117.129	101.248	116.261
	108.017	104.075	74.3443	87.6252
	80.0068	90.1877	87.7189	93.0669
MEAN	100	105.559	96.7529	101.531
SEM	6.12877	8.58853	6.24198	4.14435
n	6	6	6	6
Figure 7f
	PN80-N	Tr-15 min	Tr-1h	Tr-24h
	58.9036	119.773	155.771	136.248
	100.385	148.33	86.8232	60.7378
	94.1381	90.283	59.969	106.099
	117.288	68.9478	123.233	80.343
	124.32	90.1182	103.161	92.2874
	104.965	121.887	66.3942	69.2773
MEAN	100	106.557	99.2252	90.8321
SEM	9.37805	11.6964	14.7897	11.2222
n	6	6	6	6
Figure 7g
WB validation	NeuN	Neurons	Astrocytes	Unlabeled		GFAP	Neurons	Astrocytes	Unlabeled
		97.5704	15.8183	24.2578			6.20565	98.8634	27.7905
		107.819	5.68317	19.4852			16.1962	115.407	25.1944
		102.503	12.7313	11.6704			22.7434	103.018	22.3029
		92.1078	10.7887	21.6098			14.1851	82.7115	16.3921
	MEAN	100	11.2554	19.2558		MEAN	14.8326	100	22.92
	SEM	3.36136	2.12653	2.71036		SEM	3.40689	6.74946	2.44761
	n	4	4	4		n	4	4	4
GR activity	Neurons	PN17-N	Tr-15 min		Astrocytes	PN17-N	Tr-15 min		Unlabeled	PN17-N	Tr-15 min
nmol/min/mg prot		76.928	114.772			43.281	43.883			57.229	108.446
		52.736	99.565			31.783	52.329			73.783	82.773
		65.339	72.628			51.552	48.927			54.032	51.882
		56.893	83.661			28.537	59.811			46.255	69.033
		60.224	117.399			35.229	28.836			66.418	77.115
	Mean	62.424	97.605		Mean	38.0764	46.7572		Mean	59.5434	77.8498
	SEM	4.17224	8.68515		SEM	4.1677	5.17487		SEM	4.80801	9.25464
	n	5	5		n	5	5		n	5	5
