# Supplementary material for: Metabolomic profiling reveals a differential role for hippocampal glutathione reductase in infantile memory formation
Source: eLife. 2021 Nov 26;10:e68590. doi: 10.7554/eLife.68590 (PMC8626085; doi:10.7554/eLife.68590)
Supplement: Figure 8—source data 1. [file elife-68590-fig8-data1.xlsx]

## Sheet: Figure 8-Source Data 1
Figure 8-Source Data 1
Figure 8a
GR activity	N-Veh	N-2-AAPA 100uM	N-2-AAPA 200uM	Tr-Veh	Tr-2-AAPA 100uM	Tr-2-AAPA 200uM
	94.3383	37.0234	12.0538	154.76	92.6905	20.8104
	113.103	49.1493	21.1838	140.444	88.2862	30.0227
	107.093	75.1757	27.7679	173.555	118.45	13.1566
	84.078	59.4442	14.7454	99.9983	141.736	24.194
	101.388	80.9841	38.5574	164.901	108.521	39.369
MEAN	100	60.3553	22.8616	146.732	109.937	25.5106
SEM	5.04722	8.11164	4.77455	12.9182	9.6225	4.40942
n	5	5	5	5	5	5
Figure 8b
Vehicle	Acq	T1	T2		2-AAPA (100 uM)	Acq	T1	T2	T3		2-AAPA (200 uM)	Acq	T1	T2	T3
	9.88	11.56	312.13			7.02	20.18	5.77	432.12			14.3	92.12	117.14	900
	9.04	8.09	556.19			14.8	98.26	191.23	809.43			65.68	134.07	86.26	789.23
	14.36	13.5	437.12			26.45	13.31	16.17	499.9			10.38	180.88	14.29	414.13
	23.07	19.13	210.18			12.34	8.99	167.85	564.89			27.14	32.67	45.13	567.57
	16.43	15.18	373.69			10.93	8.63	189.66	589.99			54.18	87.89	86.34	876.54
	45.83	124.44	648.17			5.32	8.67	110.31	709.88			13.21	66.18	143.3	674.01
	40.65	54.02	712.29									9.5	22.98	18.12	493.33
	7.32	32.22	432.18
MEAN	20.8225	34.7675	460.244		MEAN	12.81	26.34	113.498	601.035		MEAN	27.77	88.1129	72.94	673.544
SEM	5.21929	13.8545	59.9602		SEM	3.07348	14.4995	34.5858	56.4106		SEM	8.68043	21.0052	18.5675	71.859
n	8	8	8		n	6	6	6	6		n	7	7	7	7
Figure 8c
Vehicle	Acq	T1	T2		2-AAPA (100 uM)	Acq	T1	T2
	16.46	305.28	403.76			19.49	466.63	321.34
	9.71	657.35	309.12			5.57	207.98	478.98
	7.03	303.1	644.89			4.58	612.11	567.87
	6.83	559.76	543.88			7.68	521.77	111.89
	12.68	709.43	433.87			14.08	244.45	377.78
	34.92	564.92	641.88			52.94	782.44	712.38
	17.55	720.9	699.33			26.21	608.33	581.37
MEAN	15.0257	545.82	525.247		MEAN	18.65	491.959	450.23
SEM	3.68094	66.7604	55.2892		SEM	6.44379	78.0404	75.1065
n	7	7	7		n	7	7	7
Figure 8d
Vehicle	Acq	T1	T2		2-AAPA (100 uM)	Acq	T1	T2
	12.58	506.26	328.65			8.52	165.93	478.27
	5.77	410.57	582.22			15.27	528.69	377.96
	34.73	213.68	437.96			27.12	472.91	412.74
	19.91	458.29	627.77			6.83	502.58	563.73
	11.28	619.94	603.56			31.66	672.82	599.93
	8.35	312.47	409.45			9.22	315.58	264.22
MEAN	15.4367	420.202	498.268		MEAN	16.4367	443.085	449.475
SEM	4.32569	58.6237	50.067		SEM	4.2984	72.4817	50.762
n	6	6	6		n	6	6	6
Figure 8e-g
GSH
VEH	PN17-N	Tr-15 min	Tr-1h	Tr-24h		2-AAPA	PN17-N	Tr-15 min	Tr-1h	Tr-24h
	92.0388	129.903	92.6214	96.699			50.6796	113.01	85.0485	125.825
	83.301	136.311	102.524	66.4078			63.4951	101.359	103.689	111.262
	104.272	126.408	100.194	87.9612			41.9417	115.34	112.427	92.0388
	118.835	161.942	82.1359	101.359			30.8738	88.5437	73.9806	100.194
	94.3689	168.35	109.515	112.427			35.534	96.699	106.602	94.9515
	107.184	155.534	95.534	104.272			57.6699	78.0583	90.8738	101.359
MEAN	100	146.408	97.0874	94.8544		MEAN	46.699	98.835	95.4369	104.272
SEM	5.15935	7.25809	3.82776	6.58264		SEM	5.2155	5.83624	5.97368	5.08278
n	6	6	6	6		n	6	6	6	6
GSSG
VEH	PN17-N	Tr-15 min	Tr-1h	Tr-24h		2-AAPA	PN17-N	Tr-15 min	Tr-1h	Tr-24h
	104.297	36.3281	41.0156	49.2188			124.219	90.2344	144.141	77.3438
	145.312	62.1094	50.3906	62.1094			185.156	73.8281	71.4844	91.4062
	75	43.3594	69.1406	50.3906			142.969	107.812	114.844	106.641
	87.8906	50.3906	43.3594	41.0156			183.984	159.375	86.7188	130.078
	114.844	56.25	72.6562	56.25			167.578	72.6562	114.844	96.0938
	72.6562	72.6562	45.7031	66.7969			162.891	133.594	121.875	97.2656
MEAN	100	53.5156	53.7109	54.2969		MEAN	161.133	106.25	108.984	99.8047
SEM	11.2714	5.34172	5.59903	3.82334		SEM	9.72374	14.1523	10.6031	7.20753
n	6	6	6	6		n	6	6	6	6
GSH/GSSG
VEH	PN17-N	Tr-15 min	Tr-1h	Tr-24h		2-AAPA	PN17-N	Tr-15 min	Tr-1h	Tr-24h
	81.521	330.328	208.608	181.494			37.6891	115.695	54.5067	150.284
	52.9562	202.741	187.952	98.7715			31.679	126.827	133.996	112.445
	128.433	269.315	133.869	161.254			27.1004	98.828	90.4344	79.7293
	124.903	296.879	174.993	228.288			15.5017	51.3224	78.8088	71.1554
	75.9087	276.477	139.241	184.637			19.5883	122.947	85.7487	91.2801
	136.279	197.753	193.1	144.205			32.7057	53.9762	68.8801	96.2662
MEAN	100	262.249	172.96	166.442		MEAN	27.3774	94.9326	85.3958	100.193
SEM	13.9996	21.4377	12.3428	17.7795		SEM	3.43999	13.9374	11.0421	11.5701
n	6	6	6	6		n	6	6	6	6
